# Supplementary material for: Reaction of Pyrrolobenzothiazines with Schiff Bases and Carbodiimides: Approach to Angular 6/5/5/5-Tetracyclic Spiroheterocycles
Source: MDPI journal article supplement (doi:10.3390/molecules29092089), 2024-05-01
Supplement: s1 [file s1]

# Supporting information

For

## Reaction of Pyrrolobenzothiazines with Schiff Bases and Carbodiimides: Approach to Angular 6/5/5/5-Tetracyclic Spiroheterocycles

Ekaterina A. Lystsova <sup>1</sup>, Anastasia D. Novokshonova <sup>2,3</sup>, Pavel V. Khramtsov <sup>2,3</sup>, Alexander S. Novikov <sup>4,5</sup>, Maksim V. Dmitriev <sup>1</sup>,  
Andrey N. Maslivets <sup>1</sup> and Ekaterina E. Khramtsova <sup>1,\*</sup>

<sup>1</sup> Department of Chemistry, Perm State University, ul. Bukireva, 15, 614990 Perm, Russia, caterina.stepanova@psu.ru

<sup>2</sup> Department of Biology, Perm State University, ul. Bukireva, 15, 614990 Perm, Russia

<sup>3</sup> Institute of Ecology and Genetics of Microorganisms, Perm Federal Research Center, The Ural Branch of Russian Academy of Sciences, ul. Goleva, 13, 614081 Perm, Russia

<sup>4</sup> Institute of Chemistry, Saint Petersburg State University, Universitetskaya nab. 7/9, 199034 St. Petersburg, Russia

<sup>5</sup> Research Institute of Chemistry, Peoples' Friendship University of Russia (RUDN University), ul. Miklukho-Maklaya, 6, 117198 Moscow, Russia

\* Correspondence: caterina.stepanova@psu.ru

## Table of contents

|                                                                                                                                                                                                        |     |
|--------------------------------------------------------------------------------------------------------------------------------------------------------------------------------------------------------|-----|
| NMR charts of compounds <b>3a-m, 3'k,j, 8a-j, 4a,b, 6d</b> .....                                                                                                                                       | S3  |
| Calculated total electronic energies (E, in Hartree), enthalpies (H, in Hartree),<br>Gibbs free energies (G, in Hartree), and entropies (S, cal/mol•K) for optimized equilibrium model structures..... | S86 |
| ORTEP images of X-ray crystal structures of compounds <b>3a, 4b, 6d, 8a</b> .....                                                                                                                      | S87 |

MAN7036.008.ESP

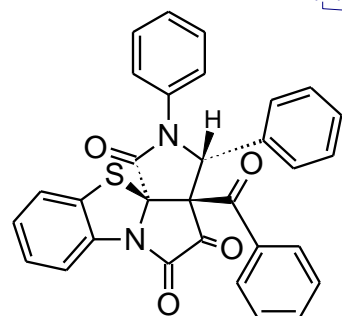

$^1\text{H}$  NMR of **3a** (400 MHz,  $\text{DMSO}-d_6$ )

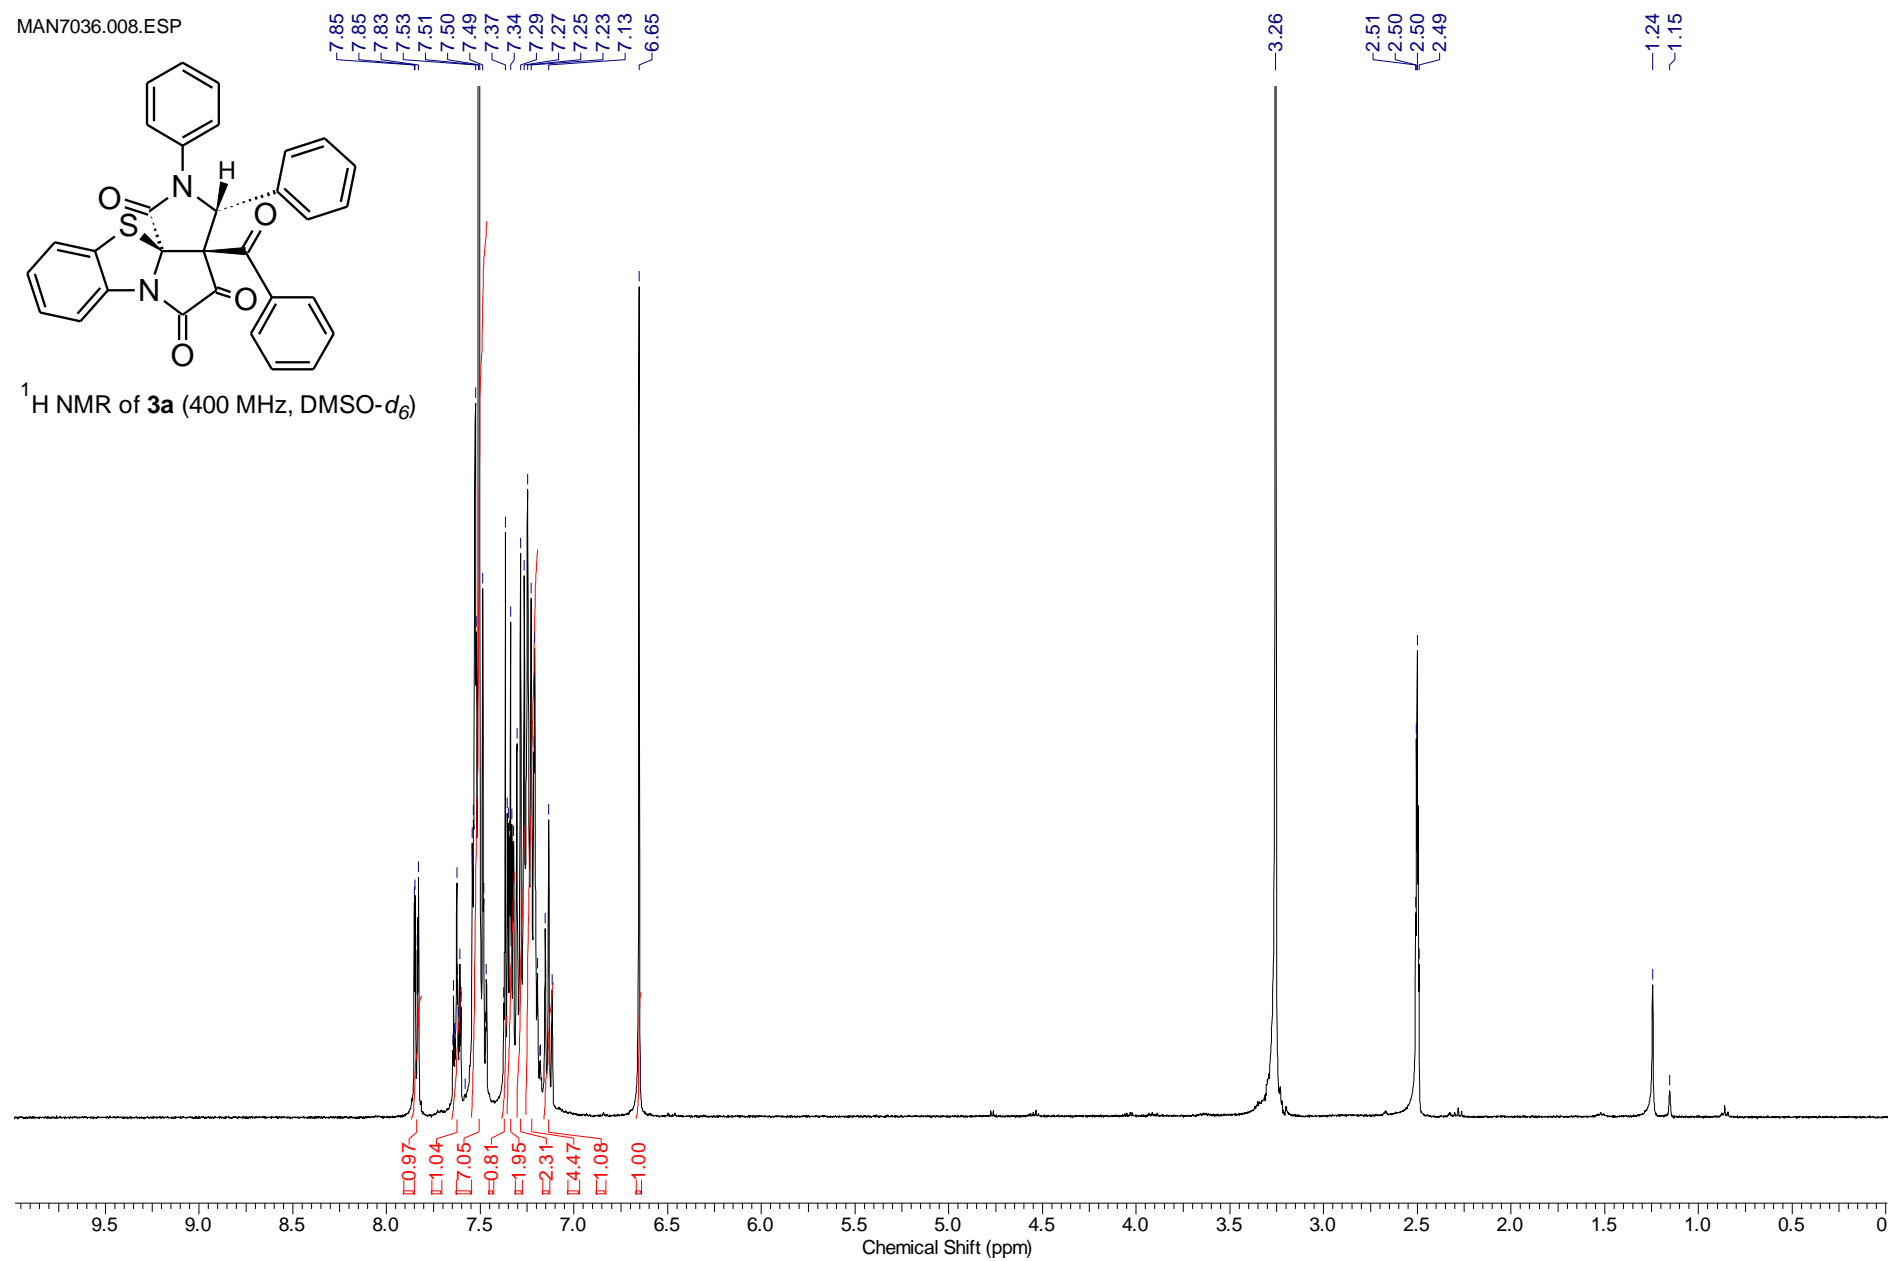

MAN7036.009

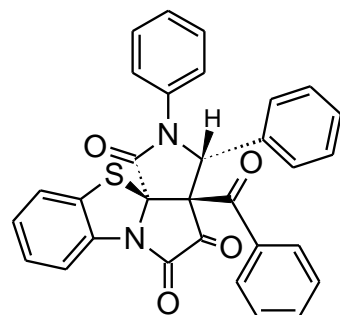

$^{13}\text{C}$  NMR of **3a** (100 MHz,  $\text{DMSO-}d_6$ )

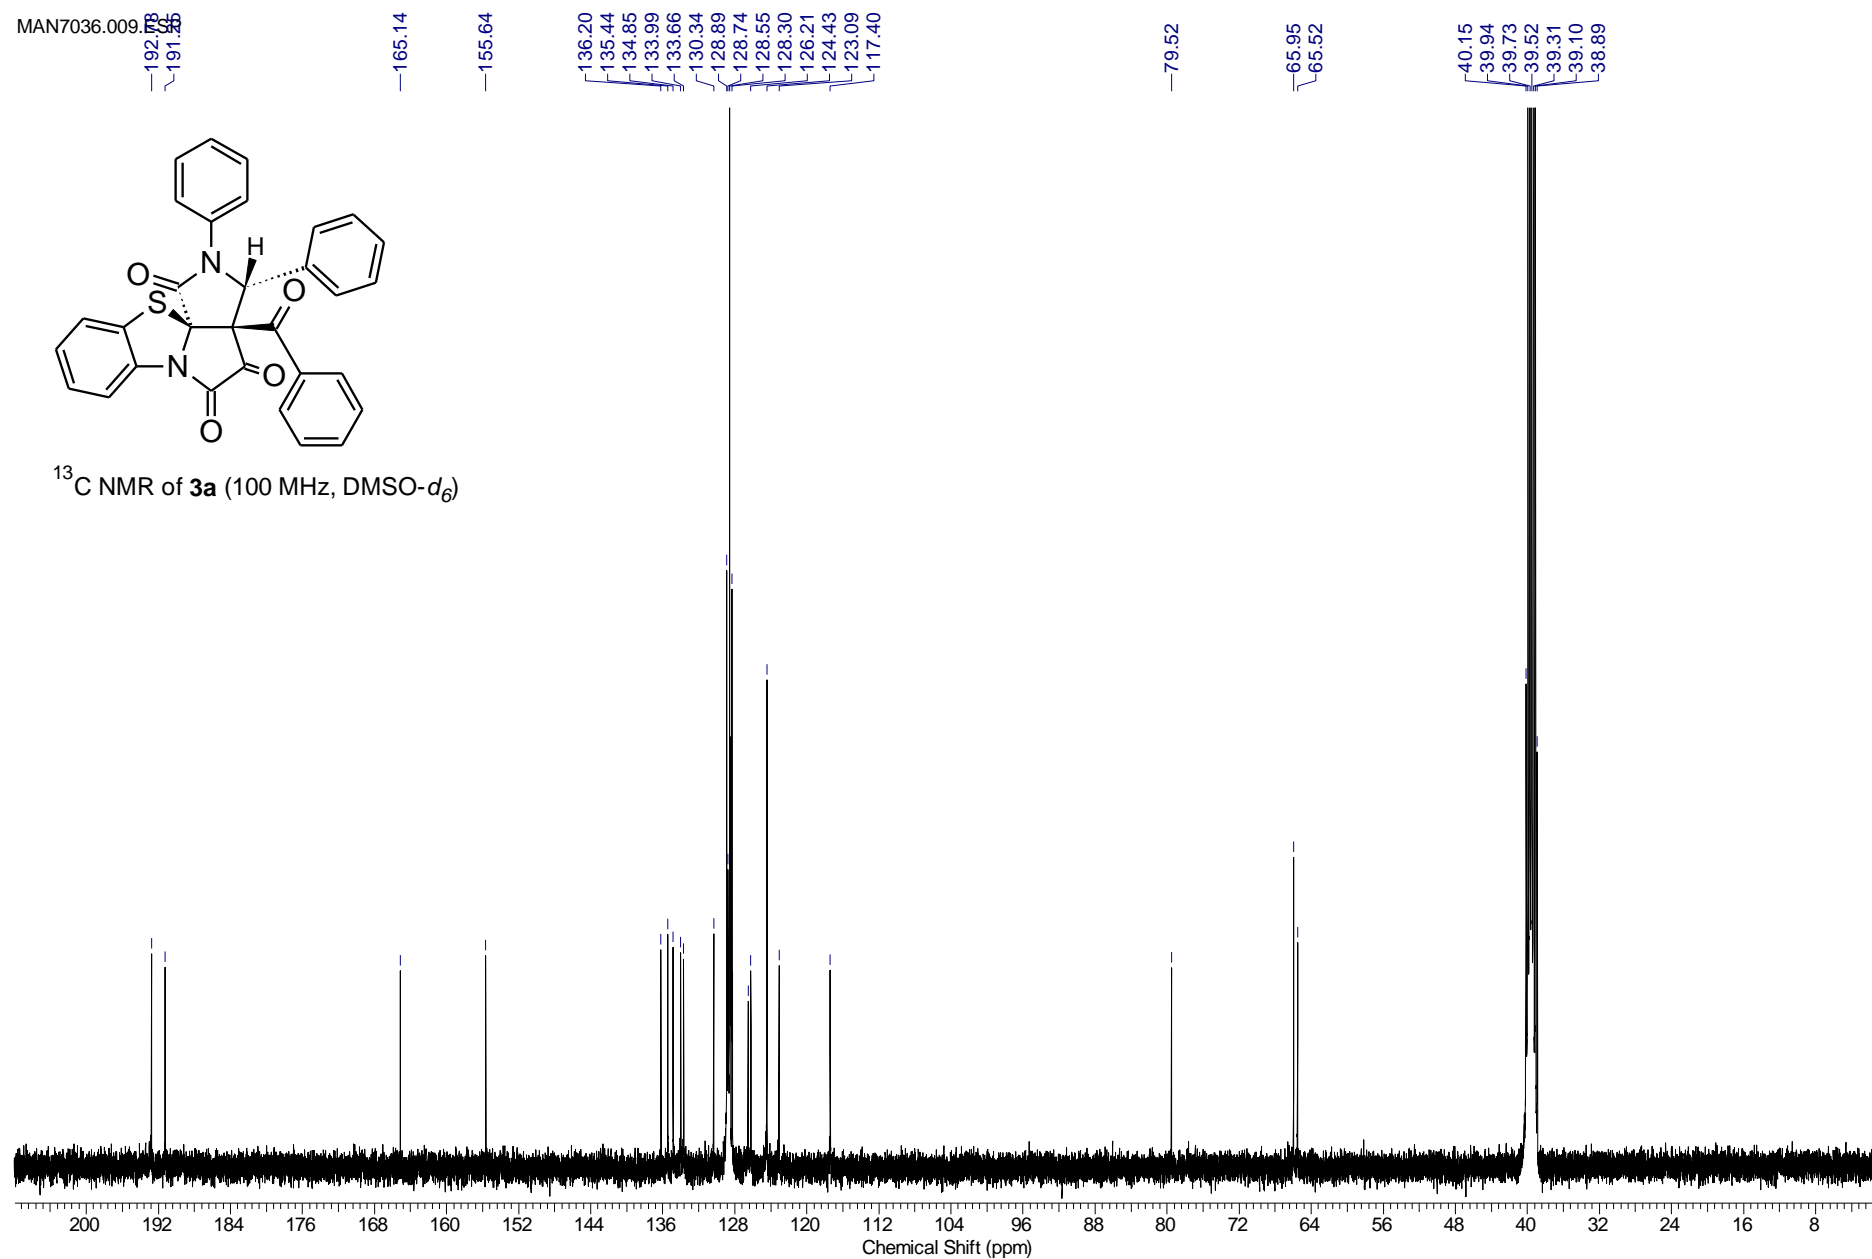

MAN7036.010.ESP

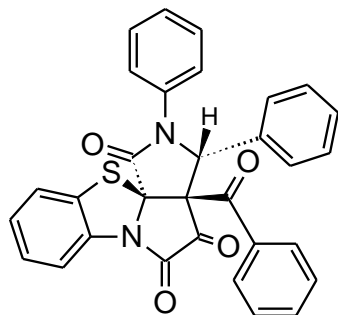

DEPT135 of **3a** (100 MHz, DMSO- $d_6$ )

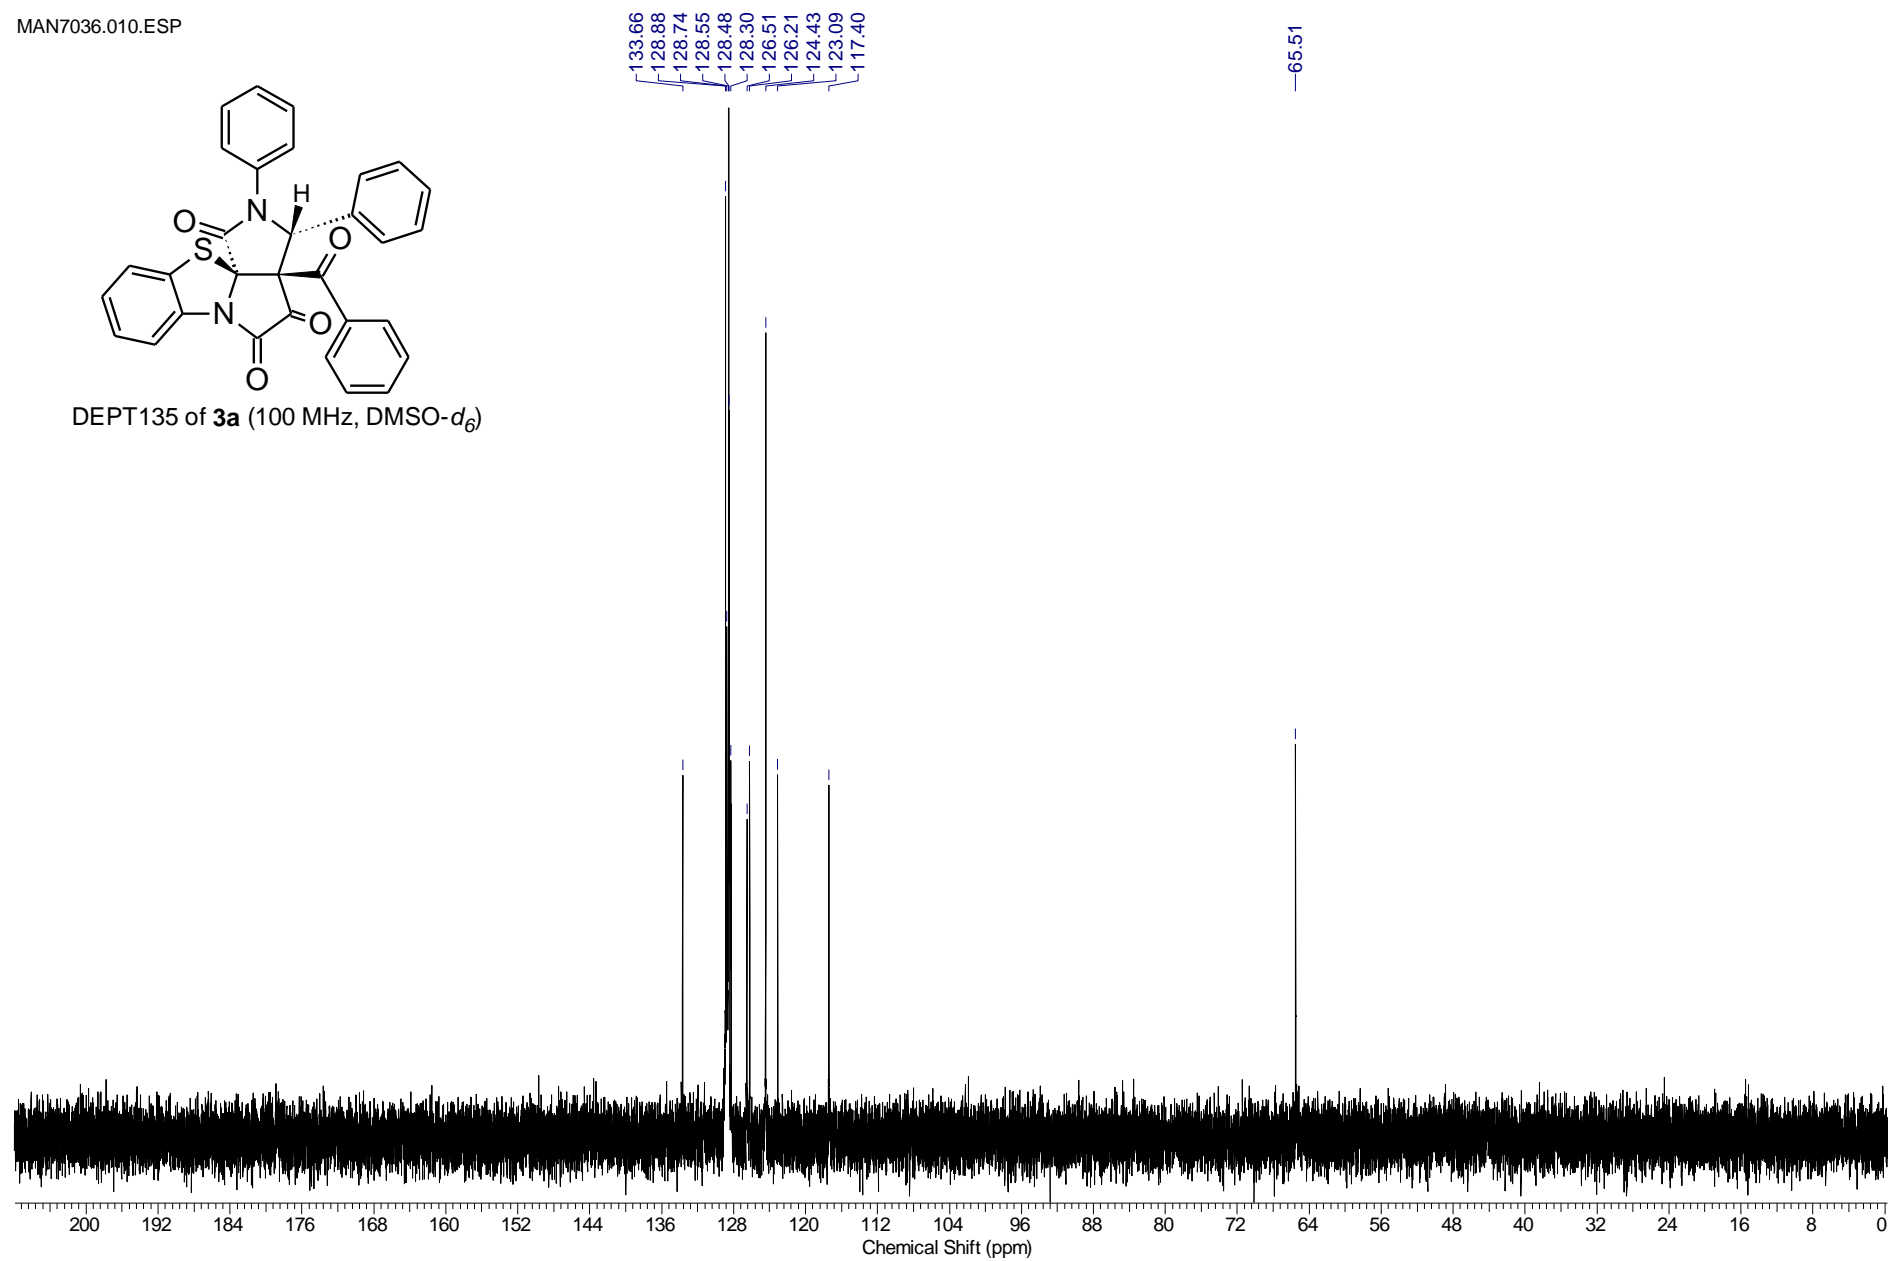

MAN8407.001.ESP

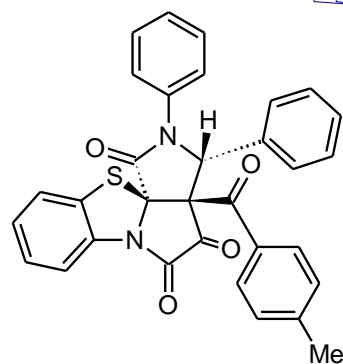

$^1\text{H}$  NMR of **3b** (400 MHz,  $\text{DMSO}-d_6$ )

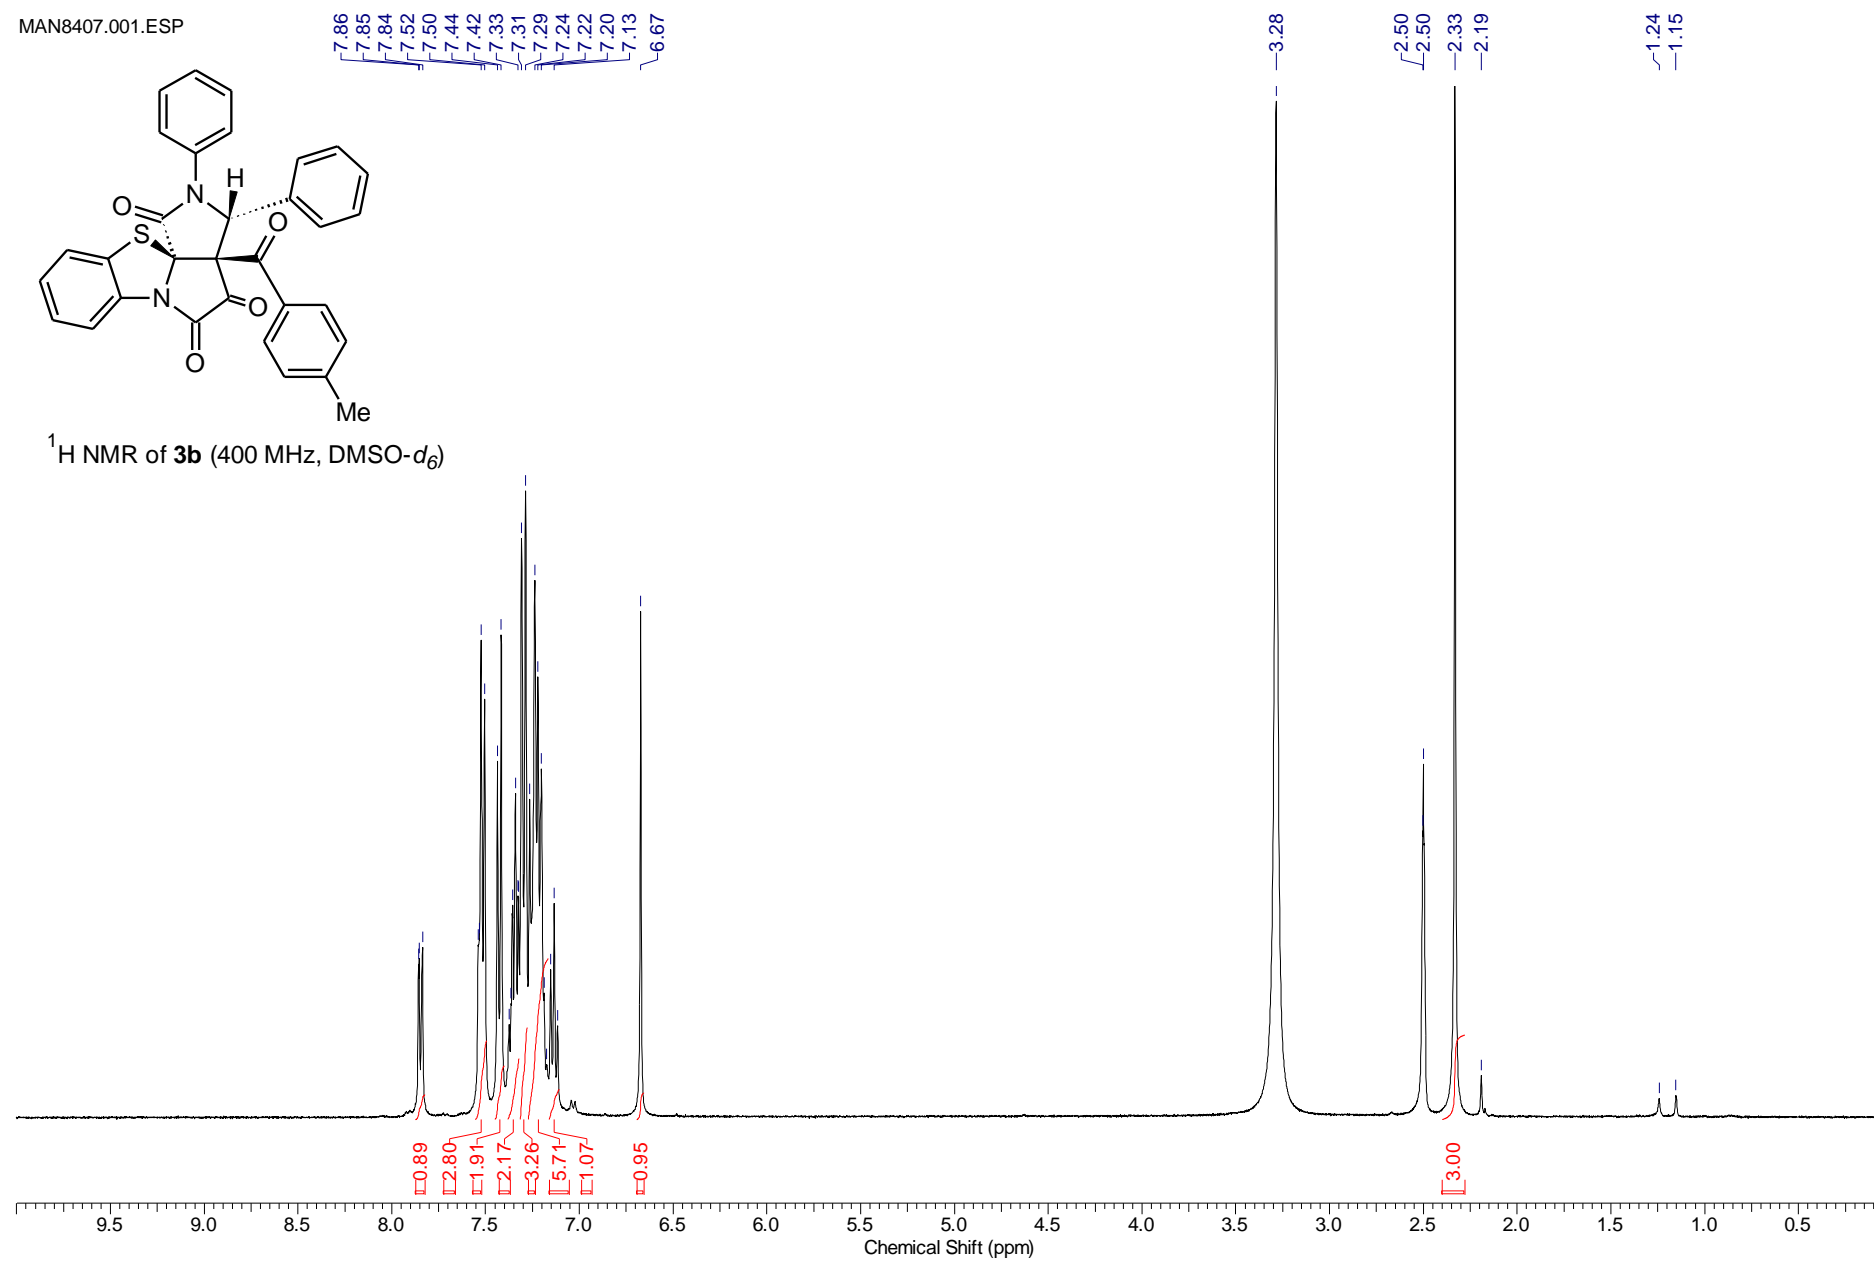

MAN8407.002.E1

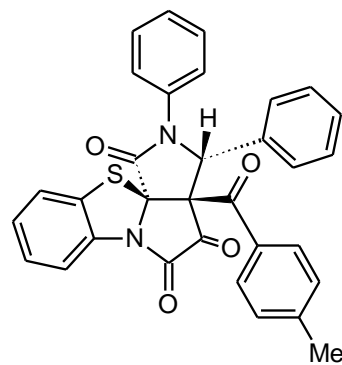

$^{13}\text{C}$  NMR of **3b** (100 MHz, DMSO- $d_6$ )

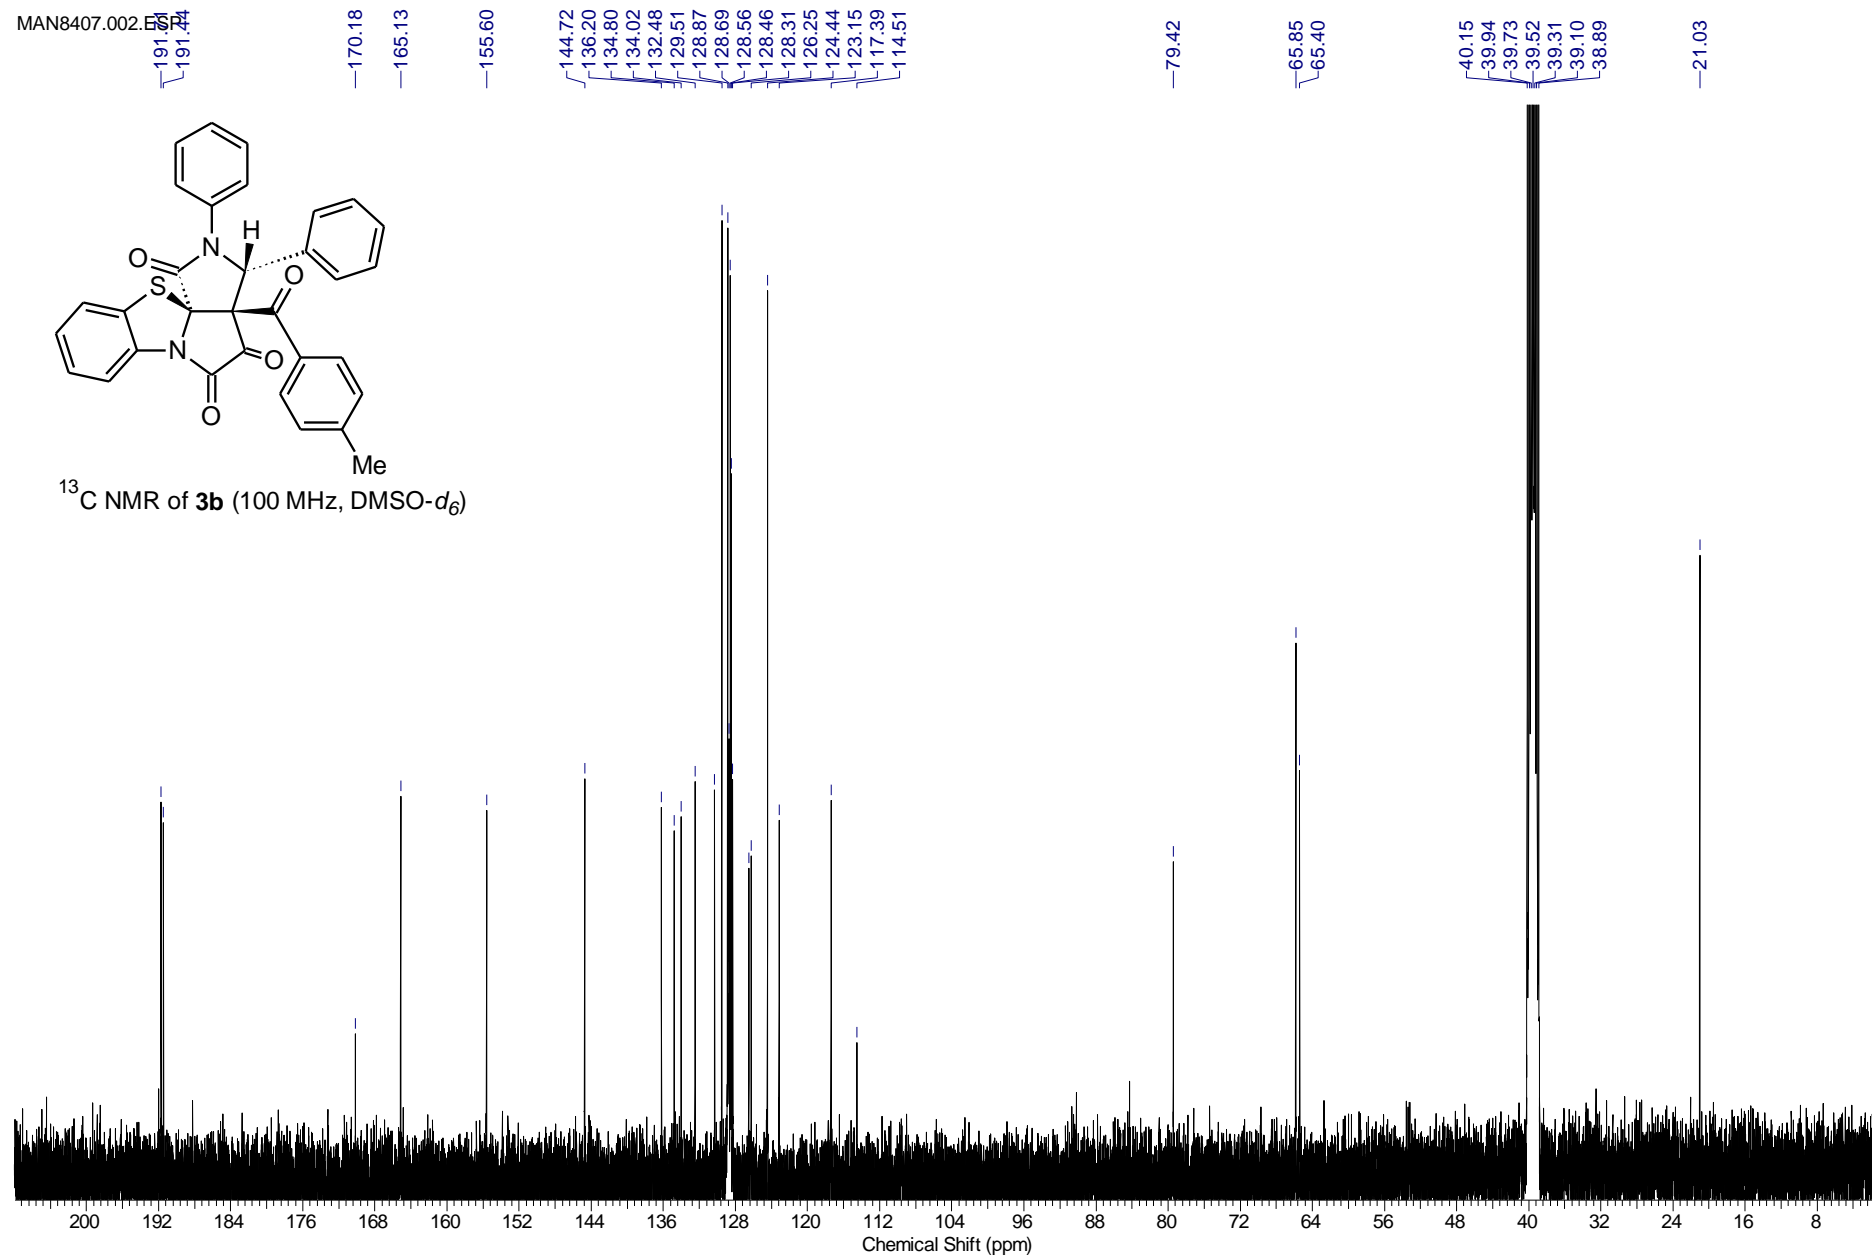

MAN8407.003.ESP

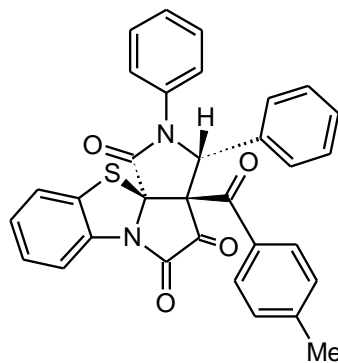

DEPT135 of **3b** (100 MHz, DMSO- $d_6$ )

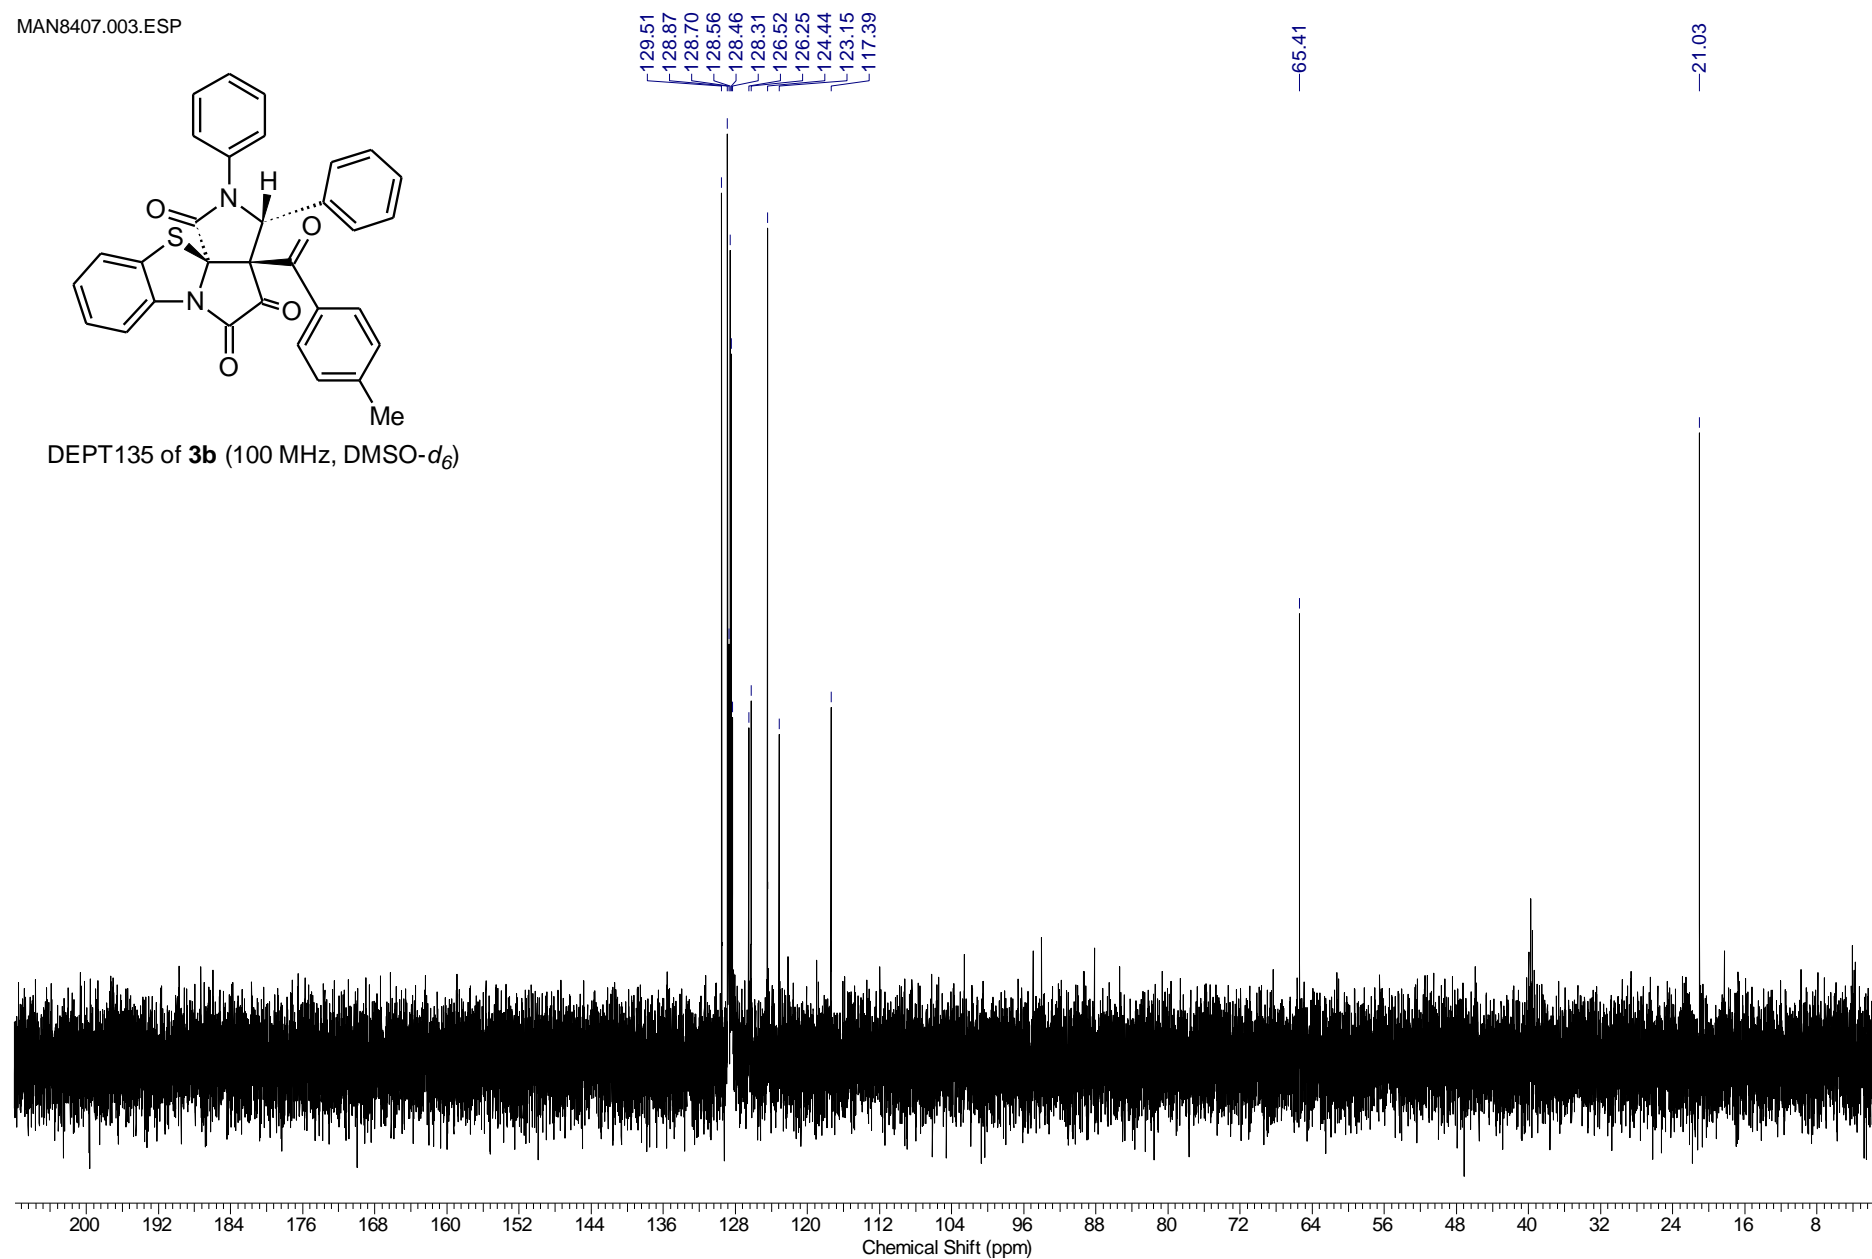



MAN8462.001.ESP

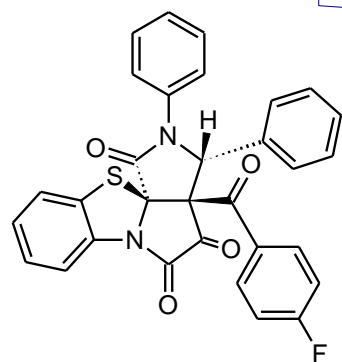

$^1\text{H}$  NMR of **3c** (400 MHz,  $\text{DMSO}-d_6$ )  
(solvate with toluene)

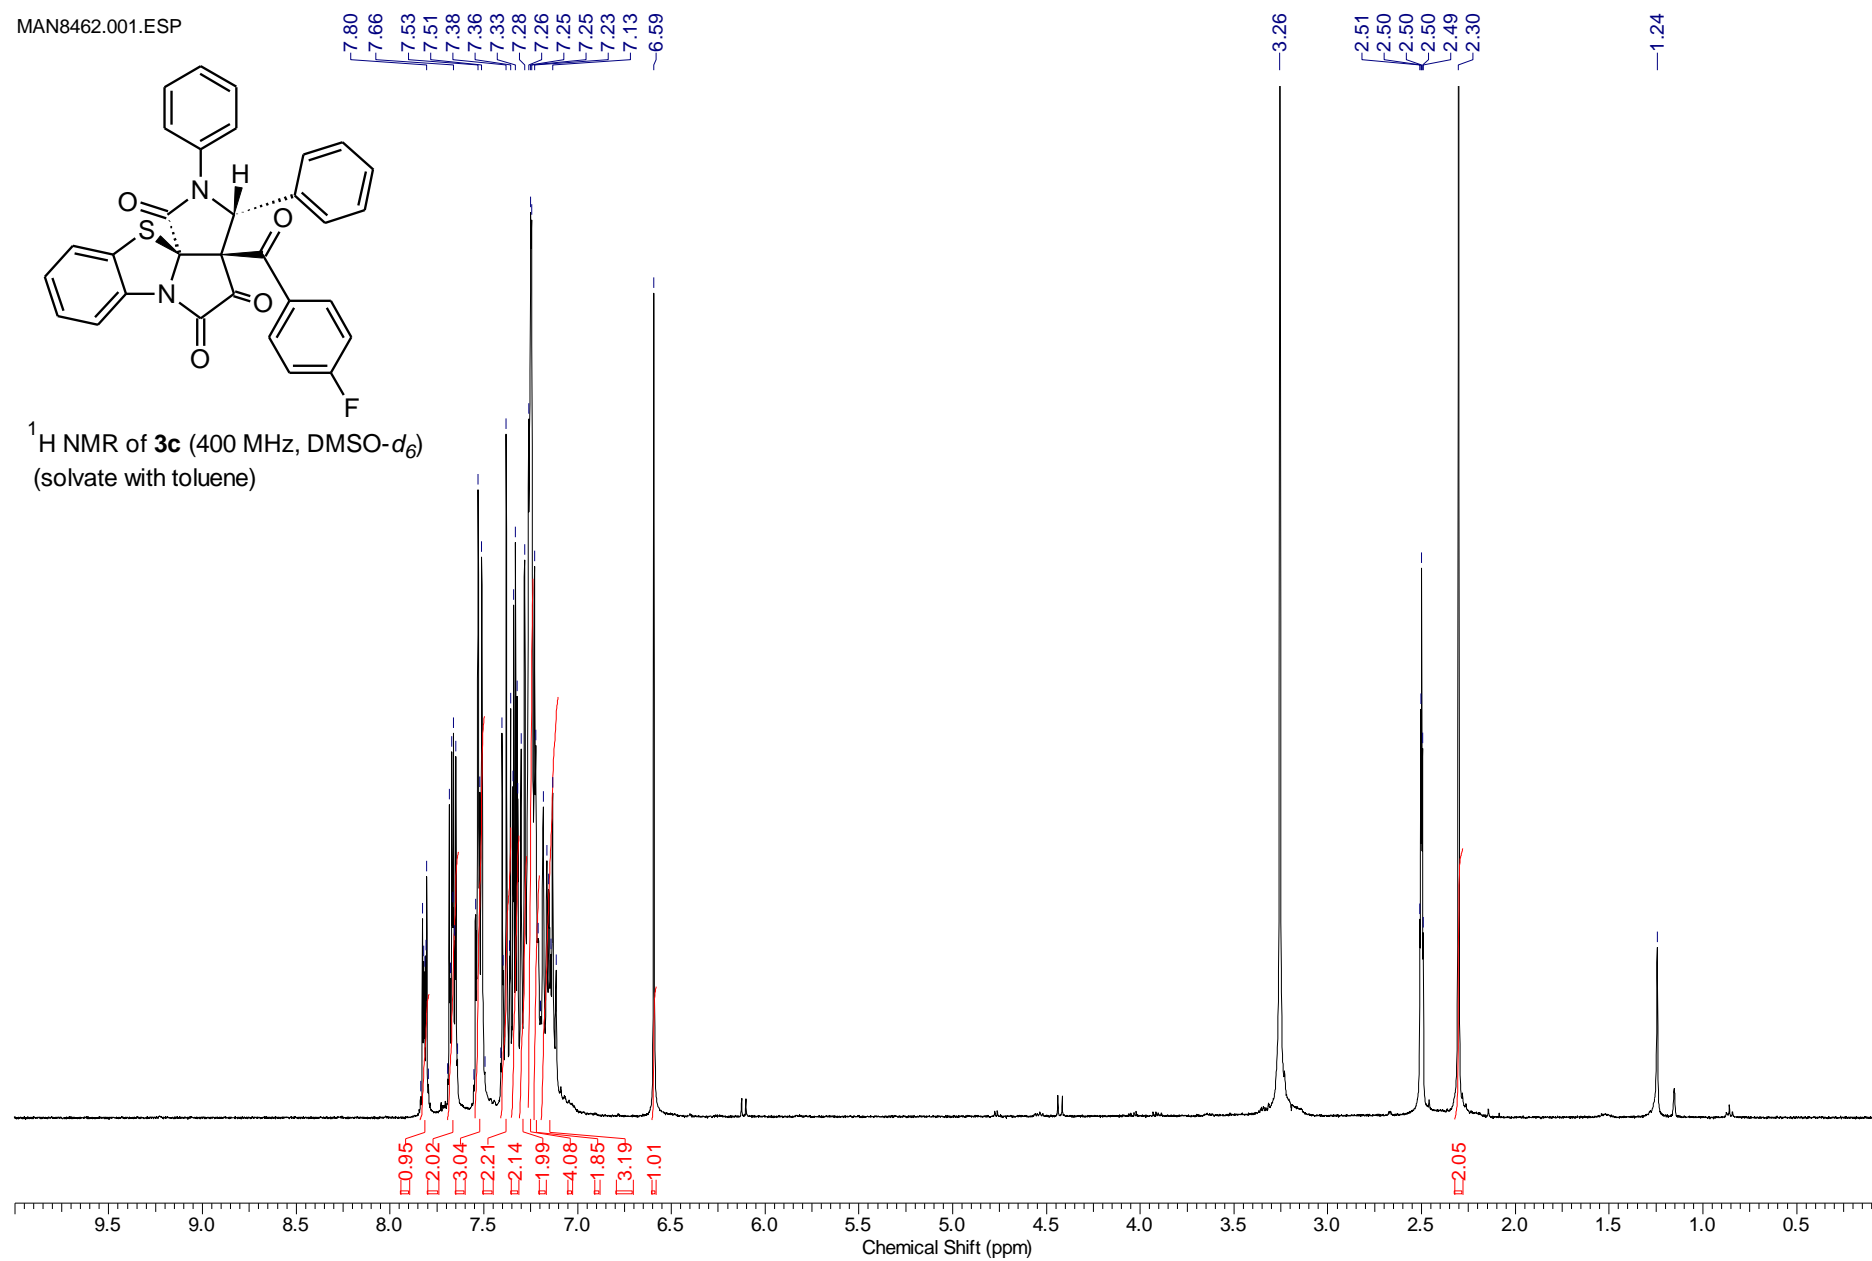

MAN8462.002

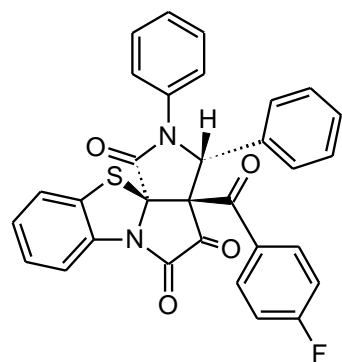

$^{13}\text{C}$  NMR of **3c** (100 MHz,  $\text{DMSO}-d_6$ )  
(solvate with toluene)

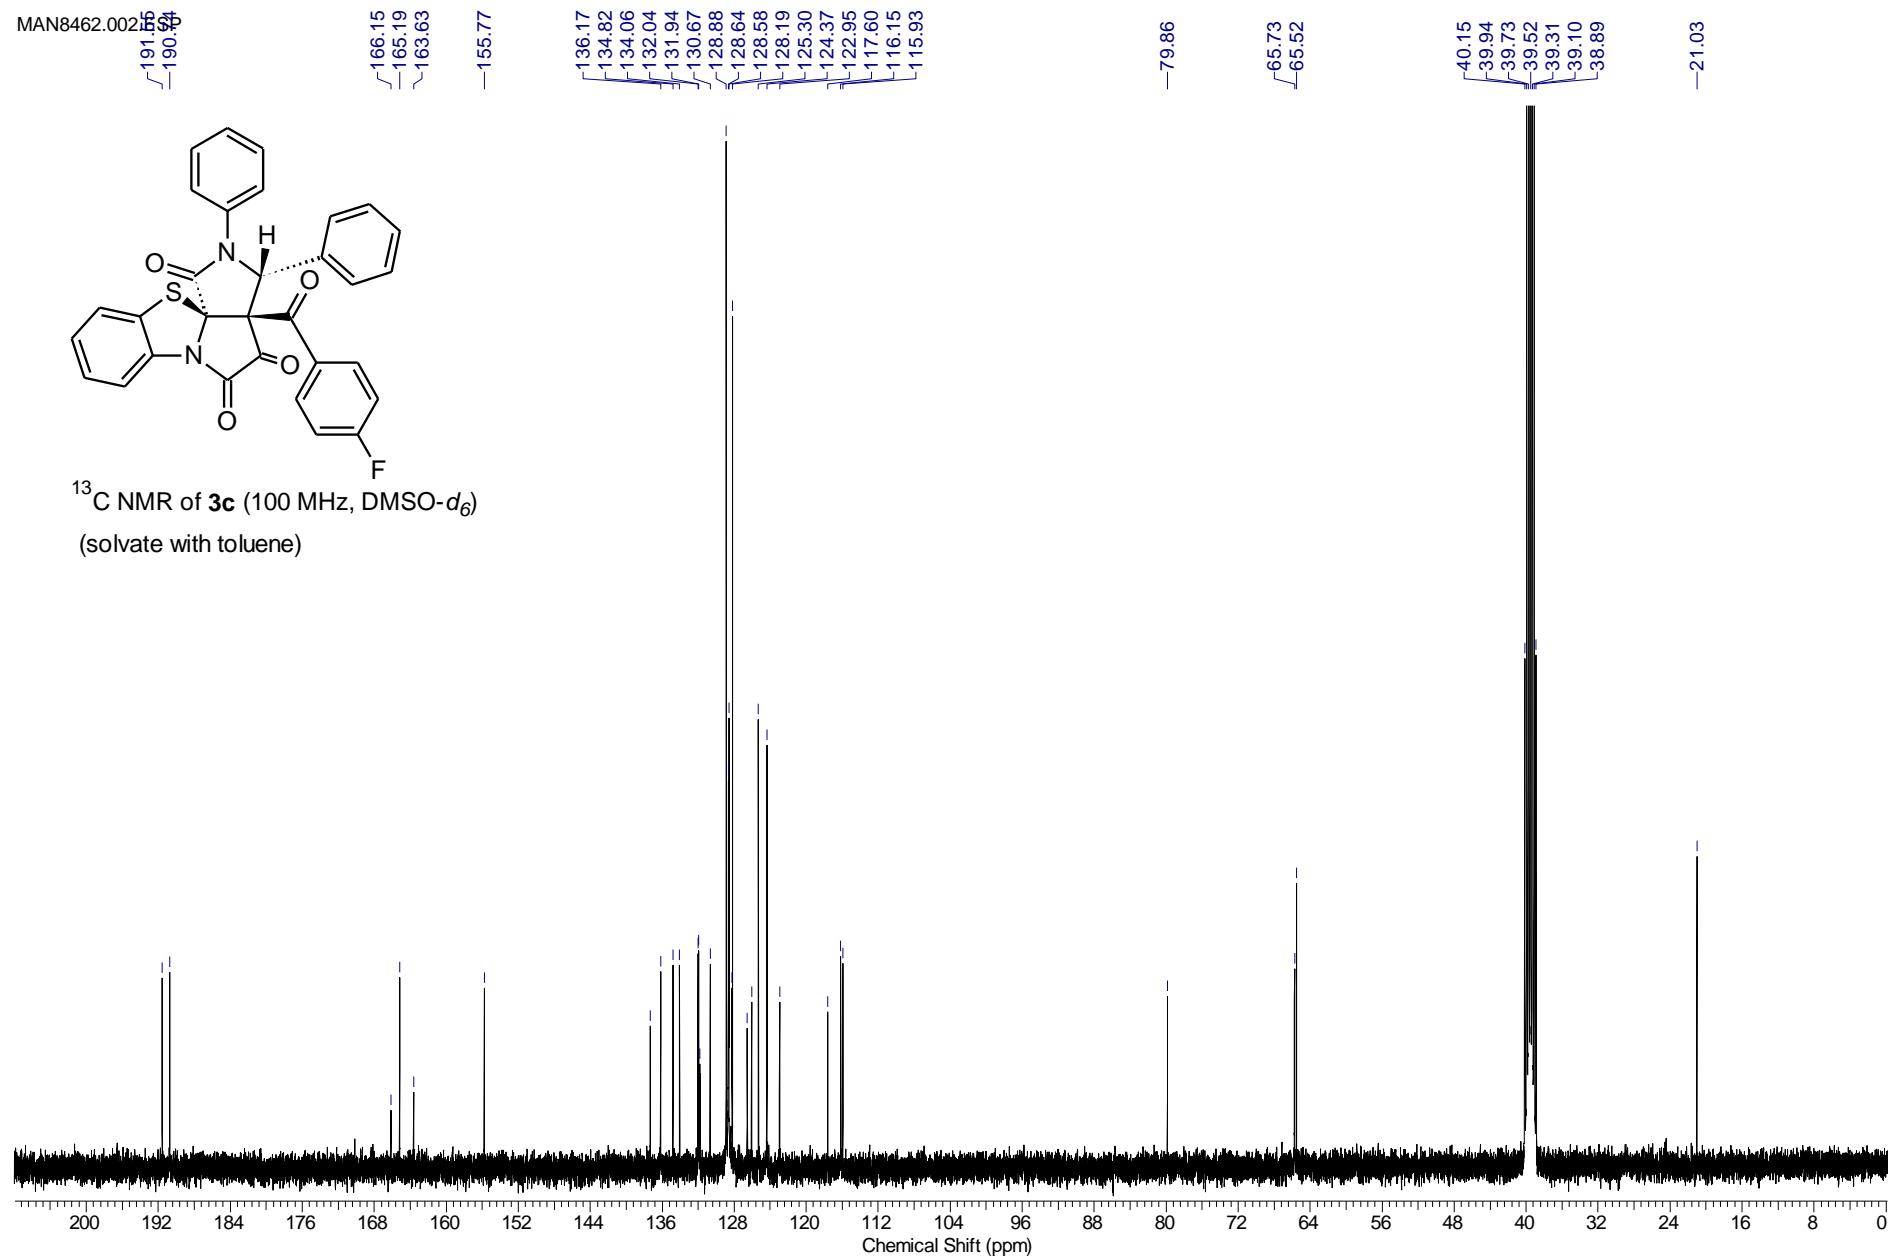

MAN8462.003.ESP

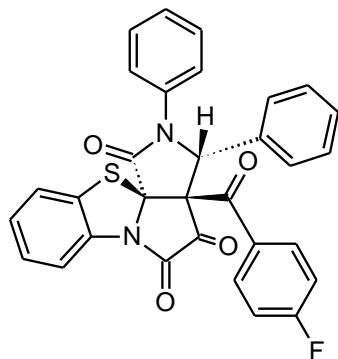

DEPT135 of **3c** (100 MHz, DMSO- $d_6$ )  
(solvate with toluene)

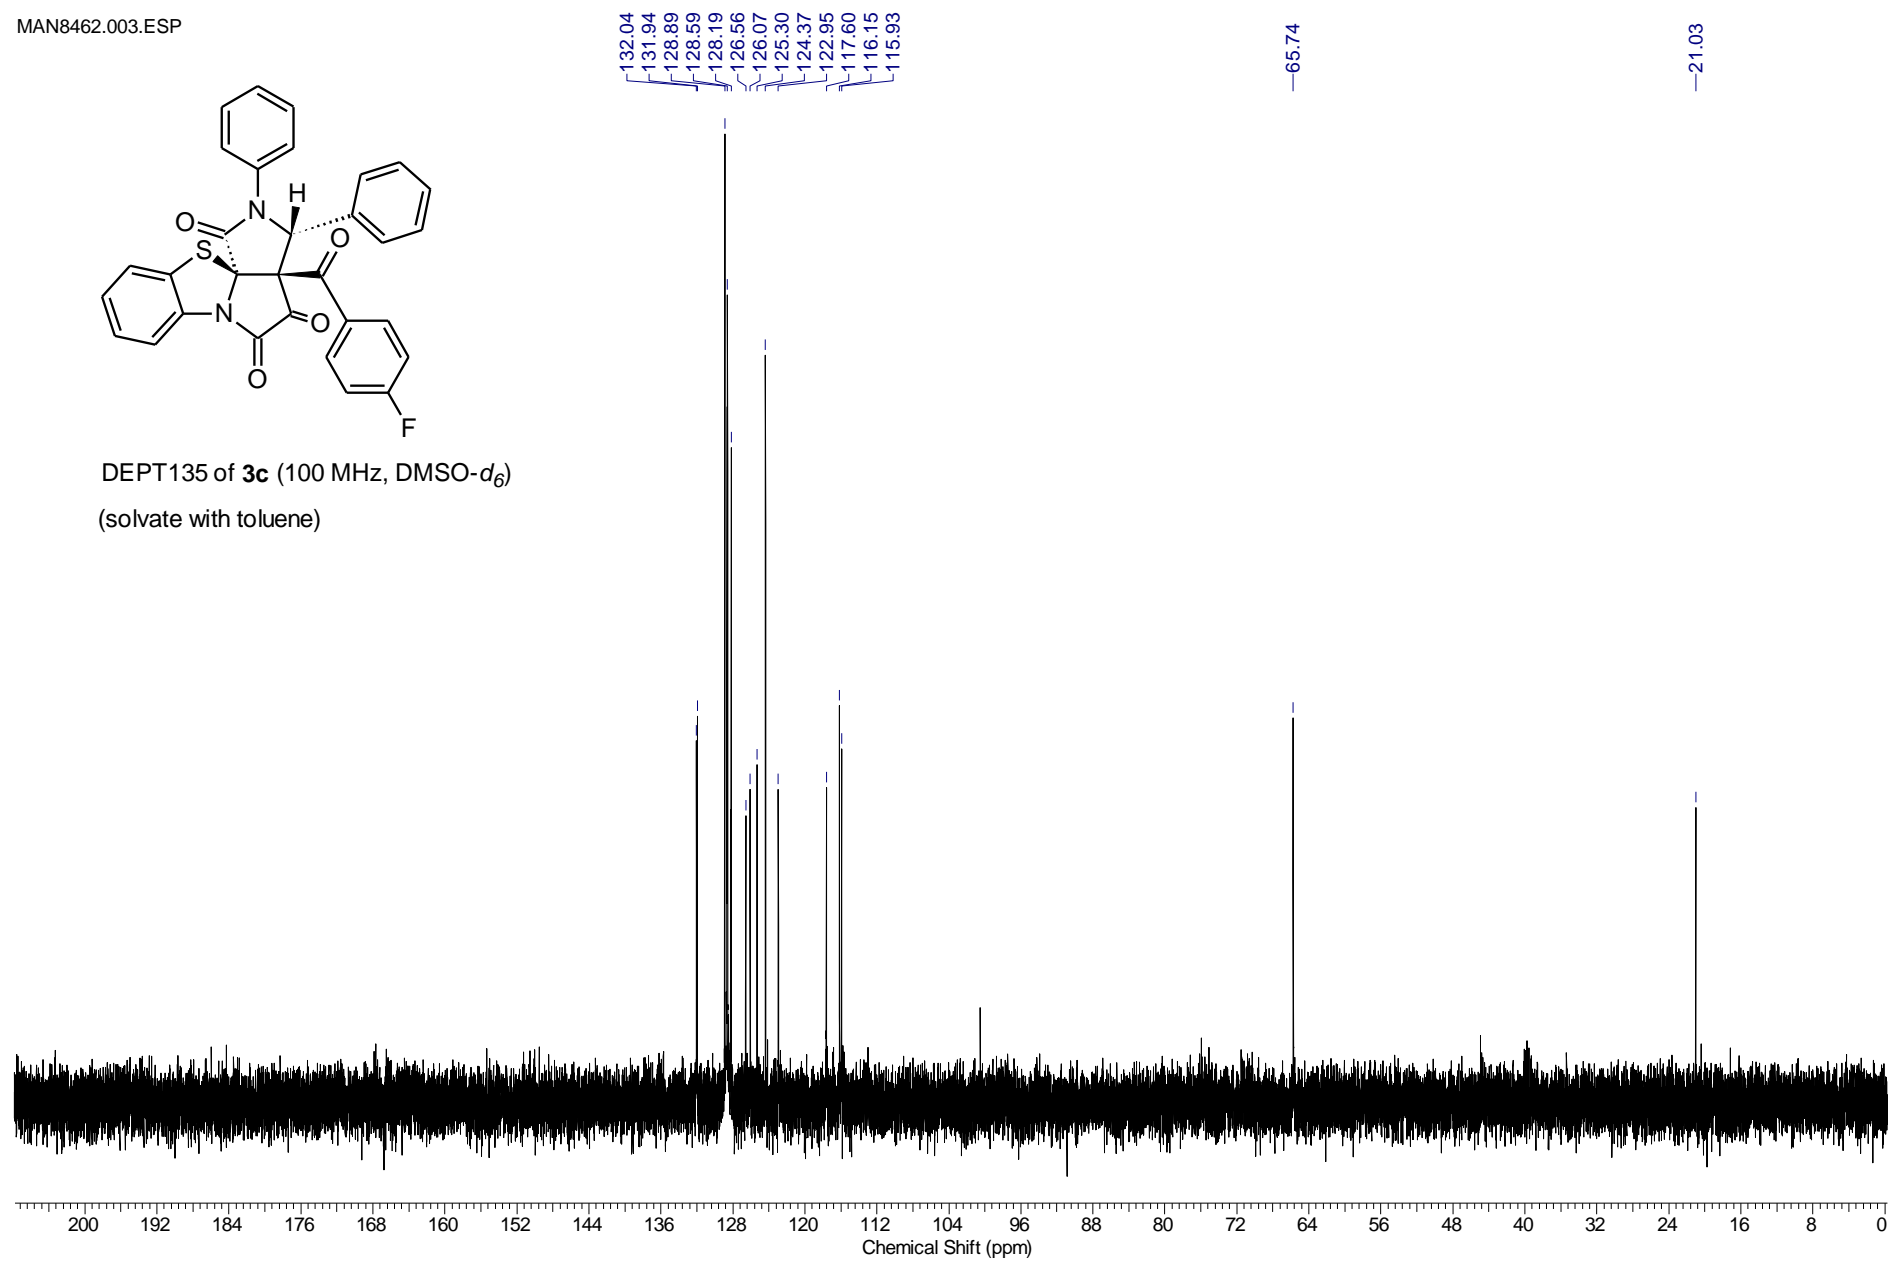

MAN8462.004.ESP

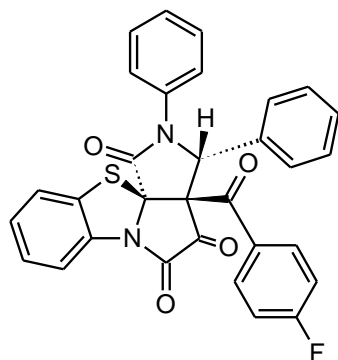

$^{19}\text{F}$  NMR of **3c** (376 MHz,  $\text{DMSO}-d_6$ )  
(solvate with toluene)

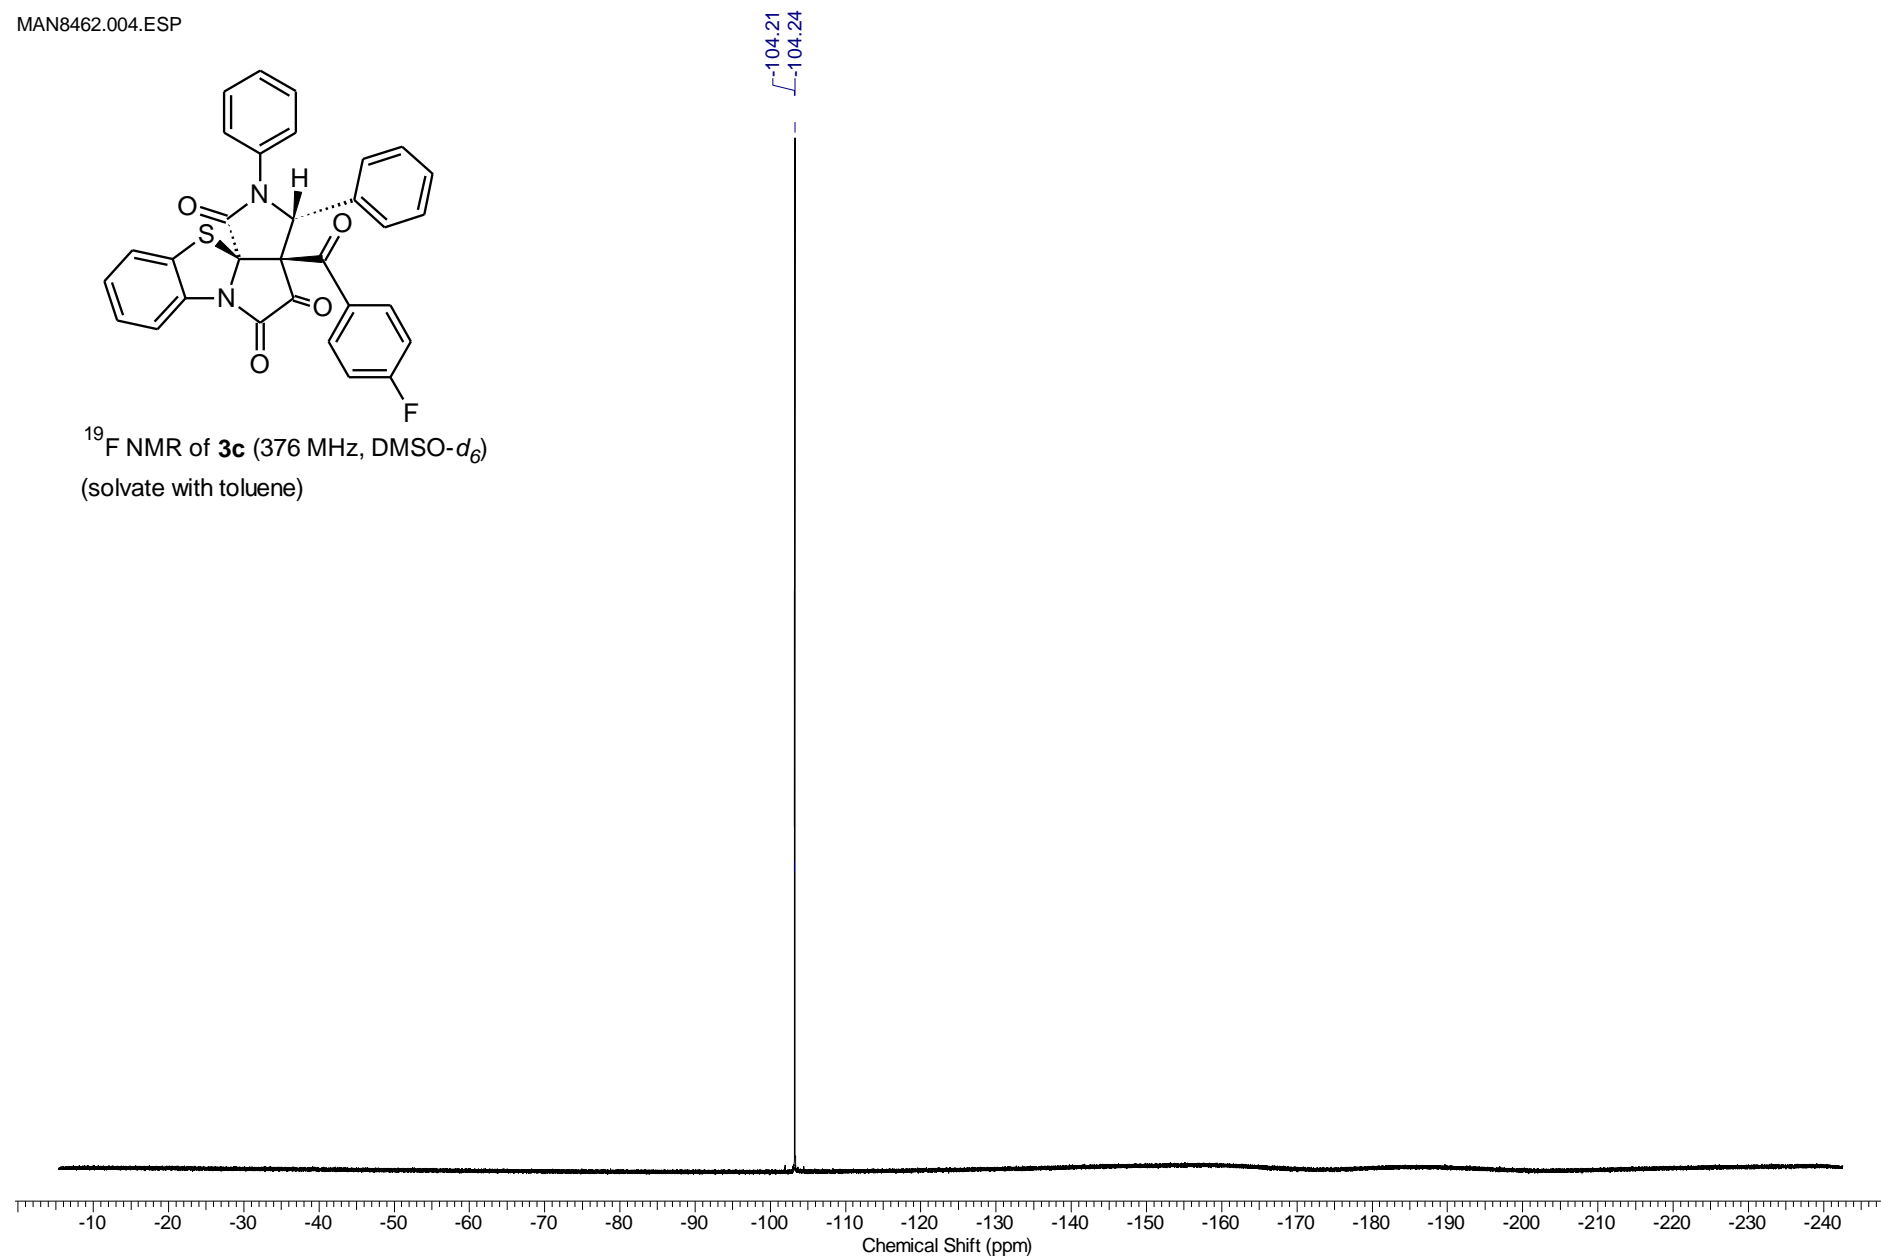

MAN8468.001.ESP

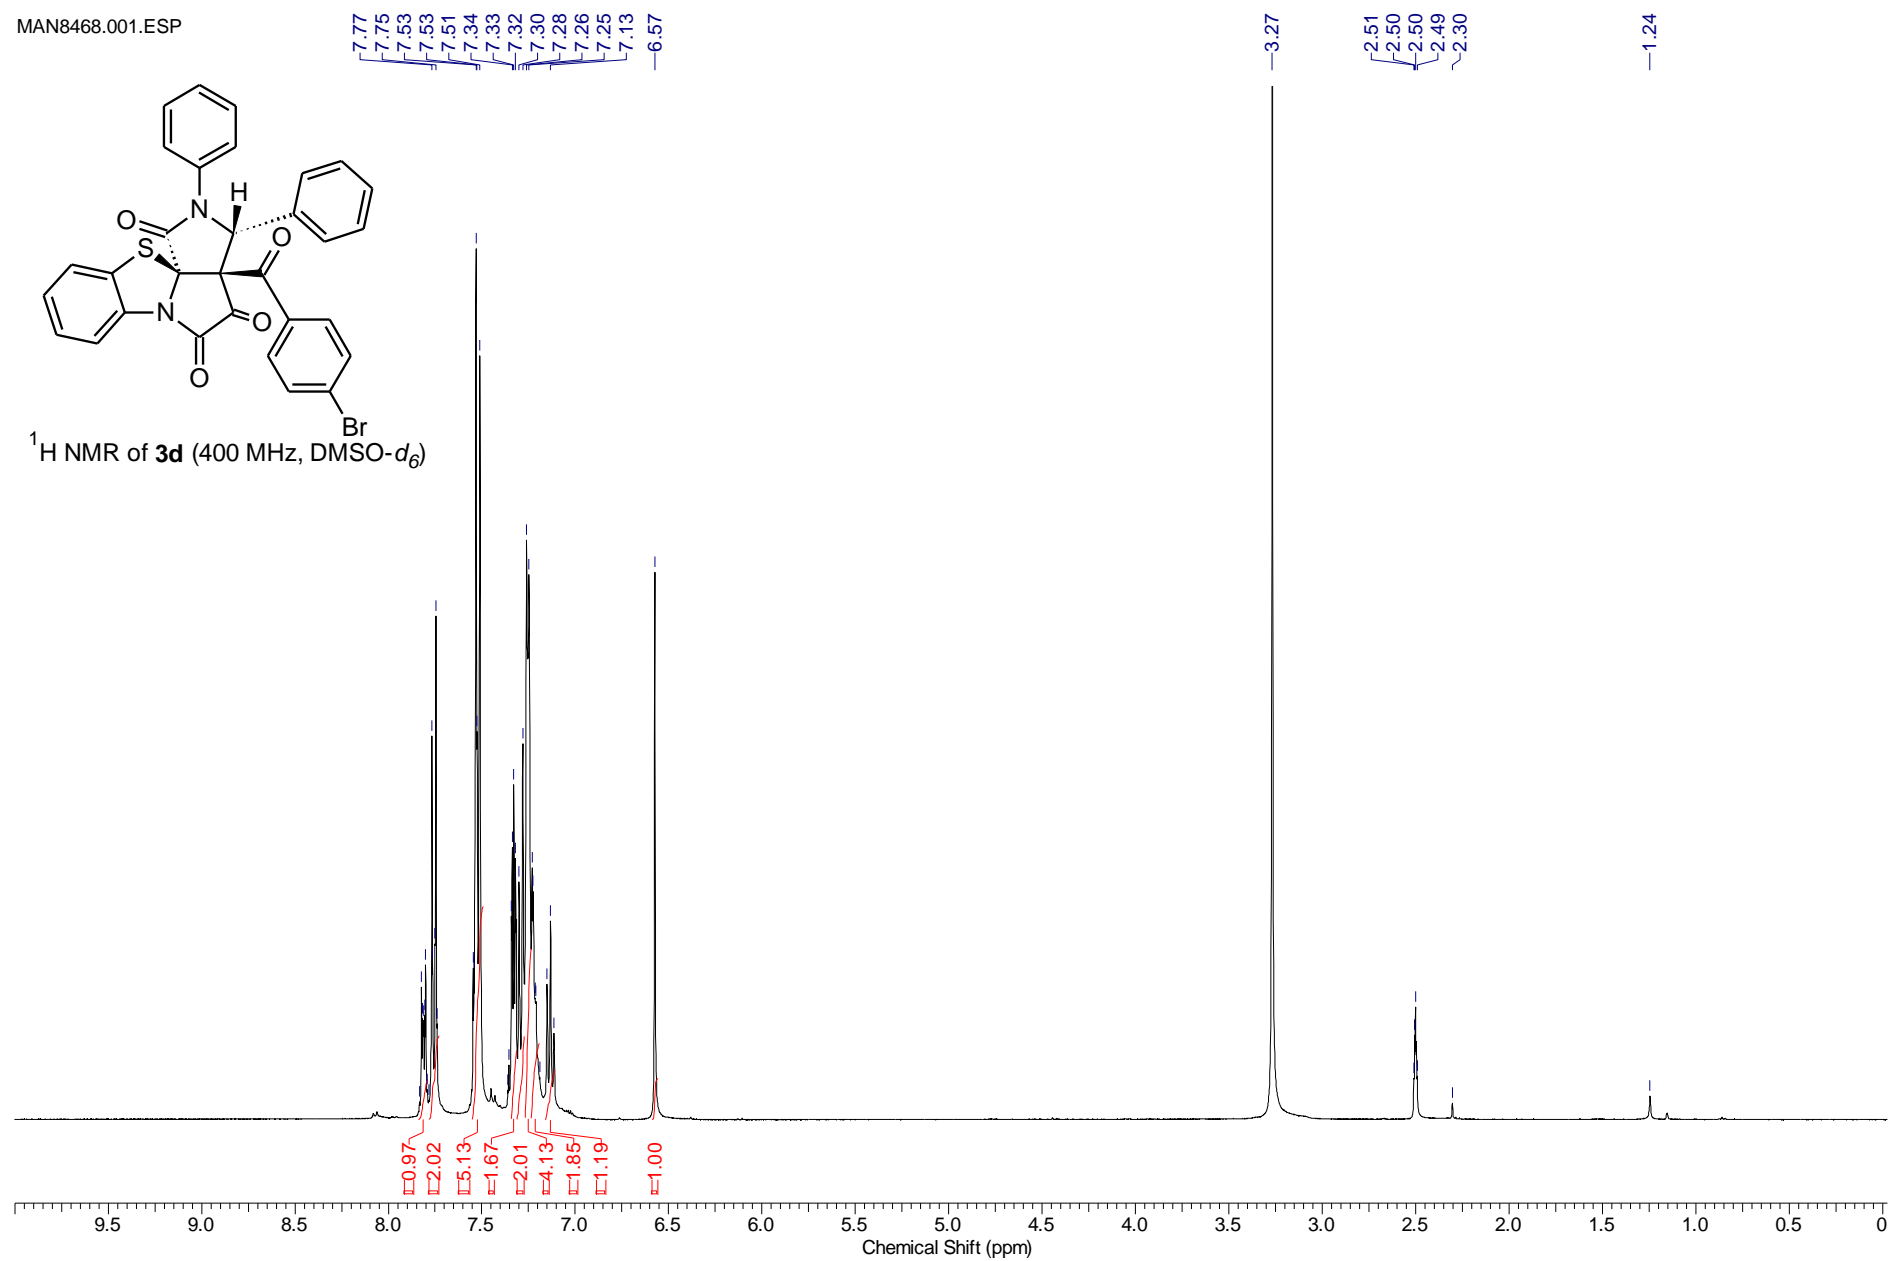

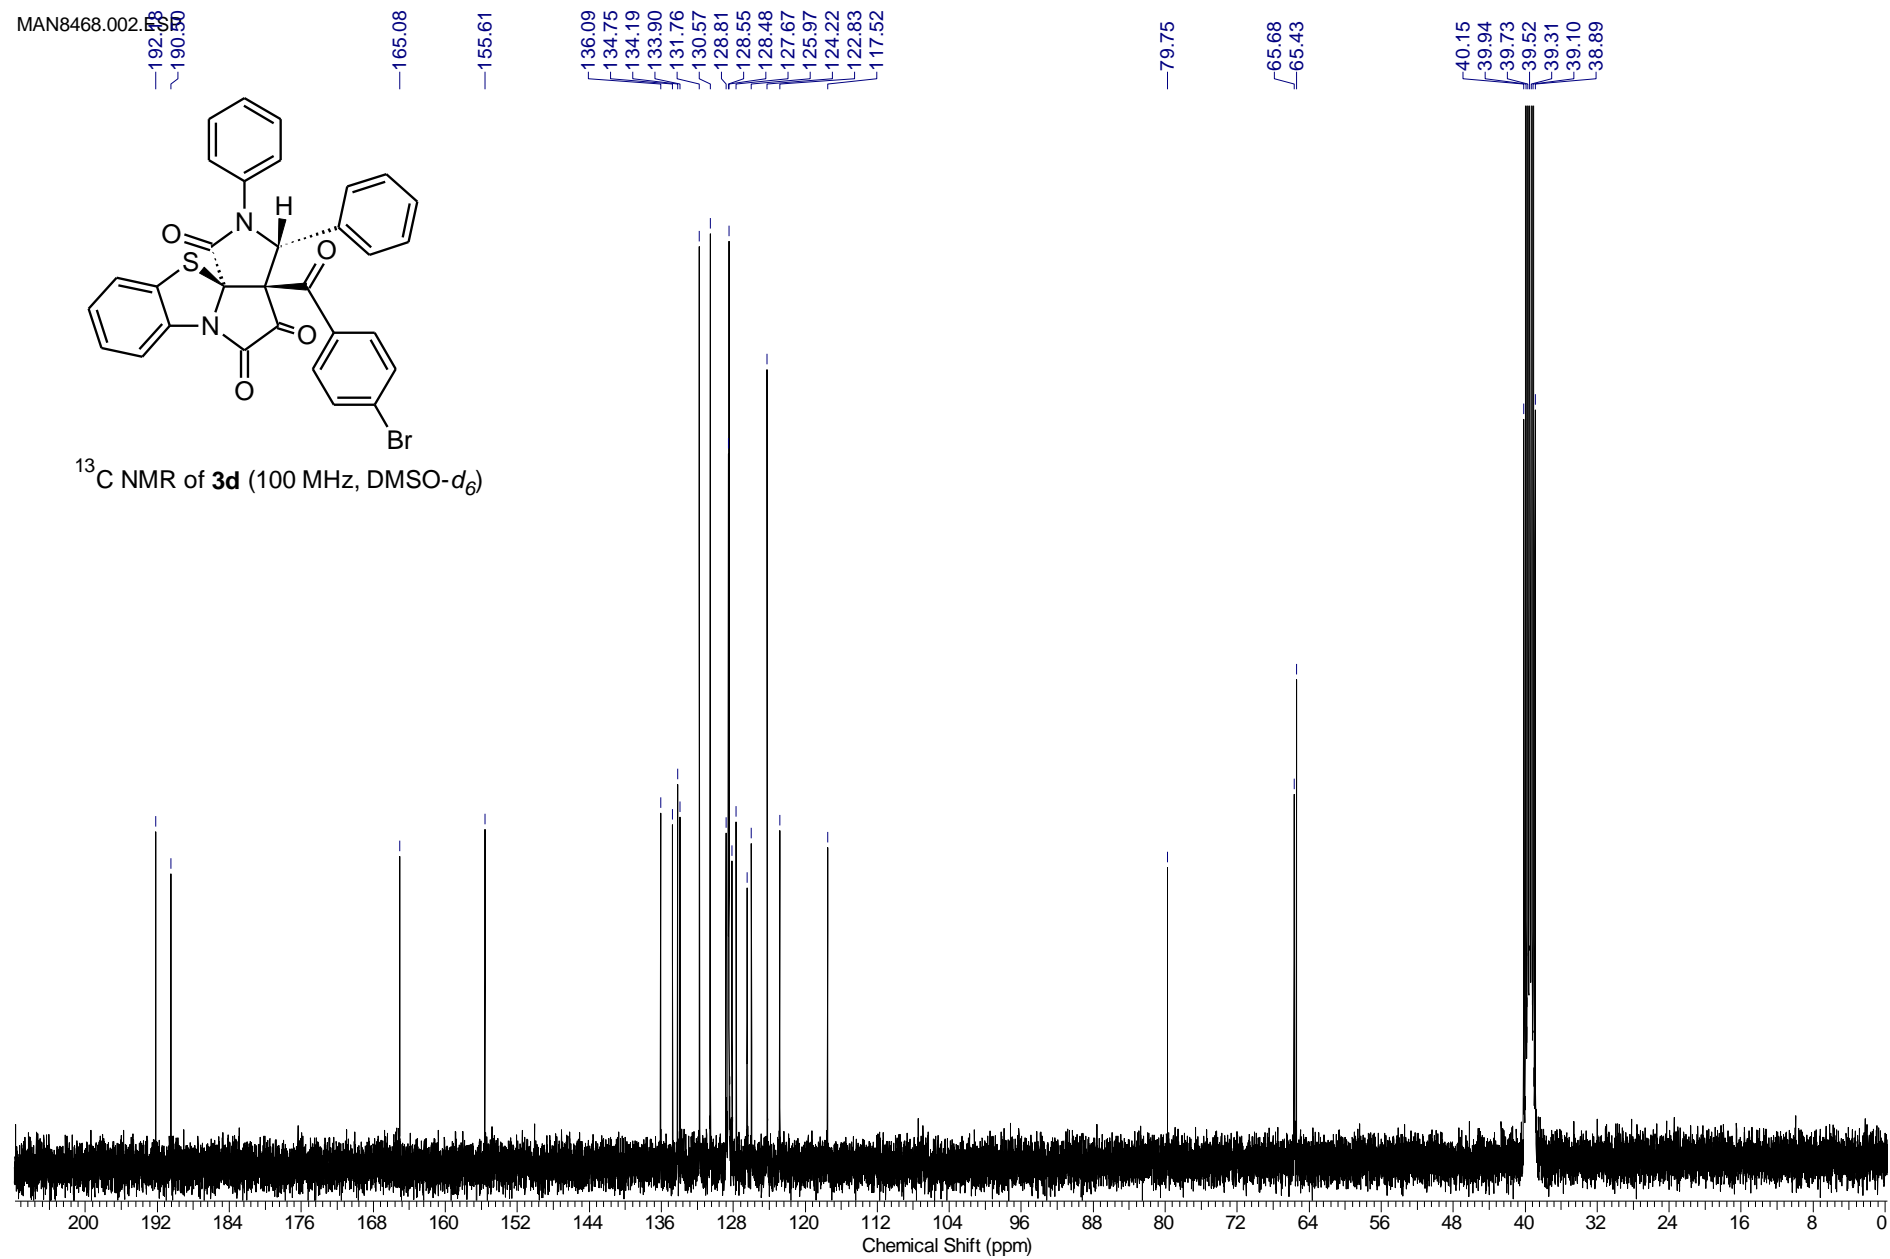

MAN8468.003.ESP

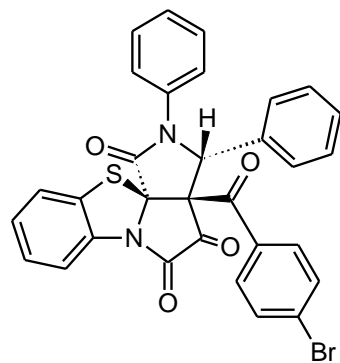

DEPT135 of **3d** (100 MHz, DMSO- $d_6$ )

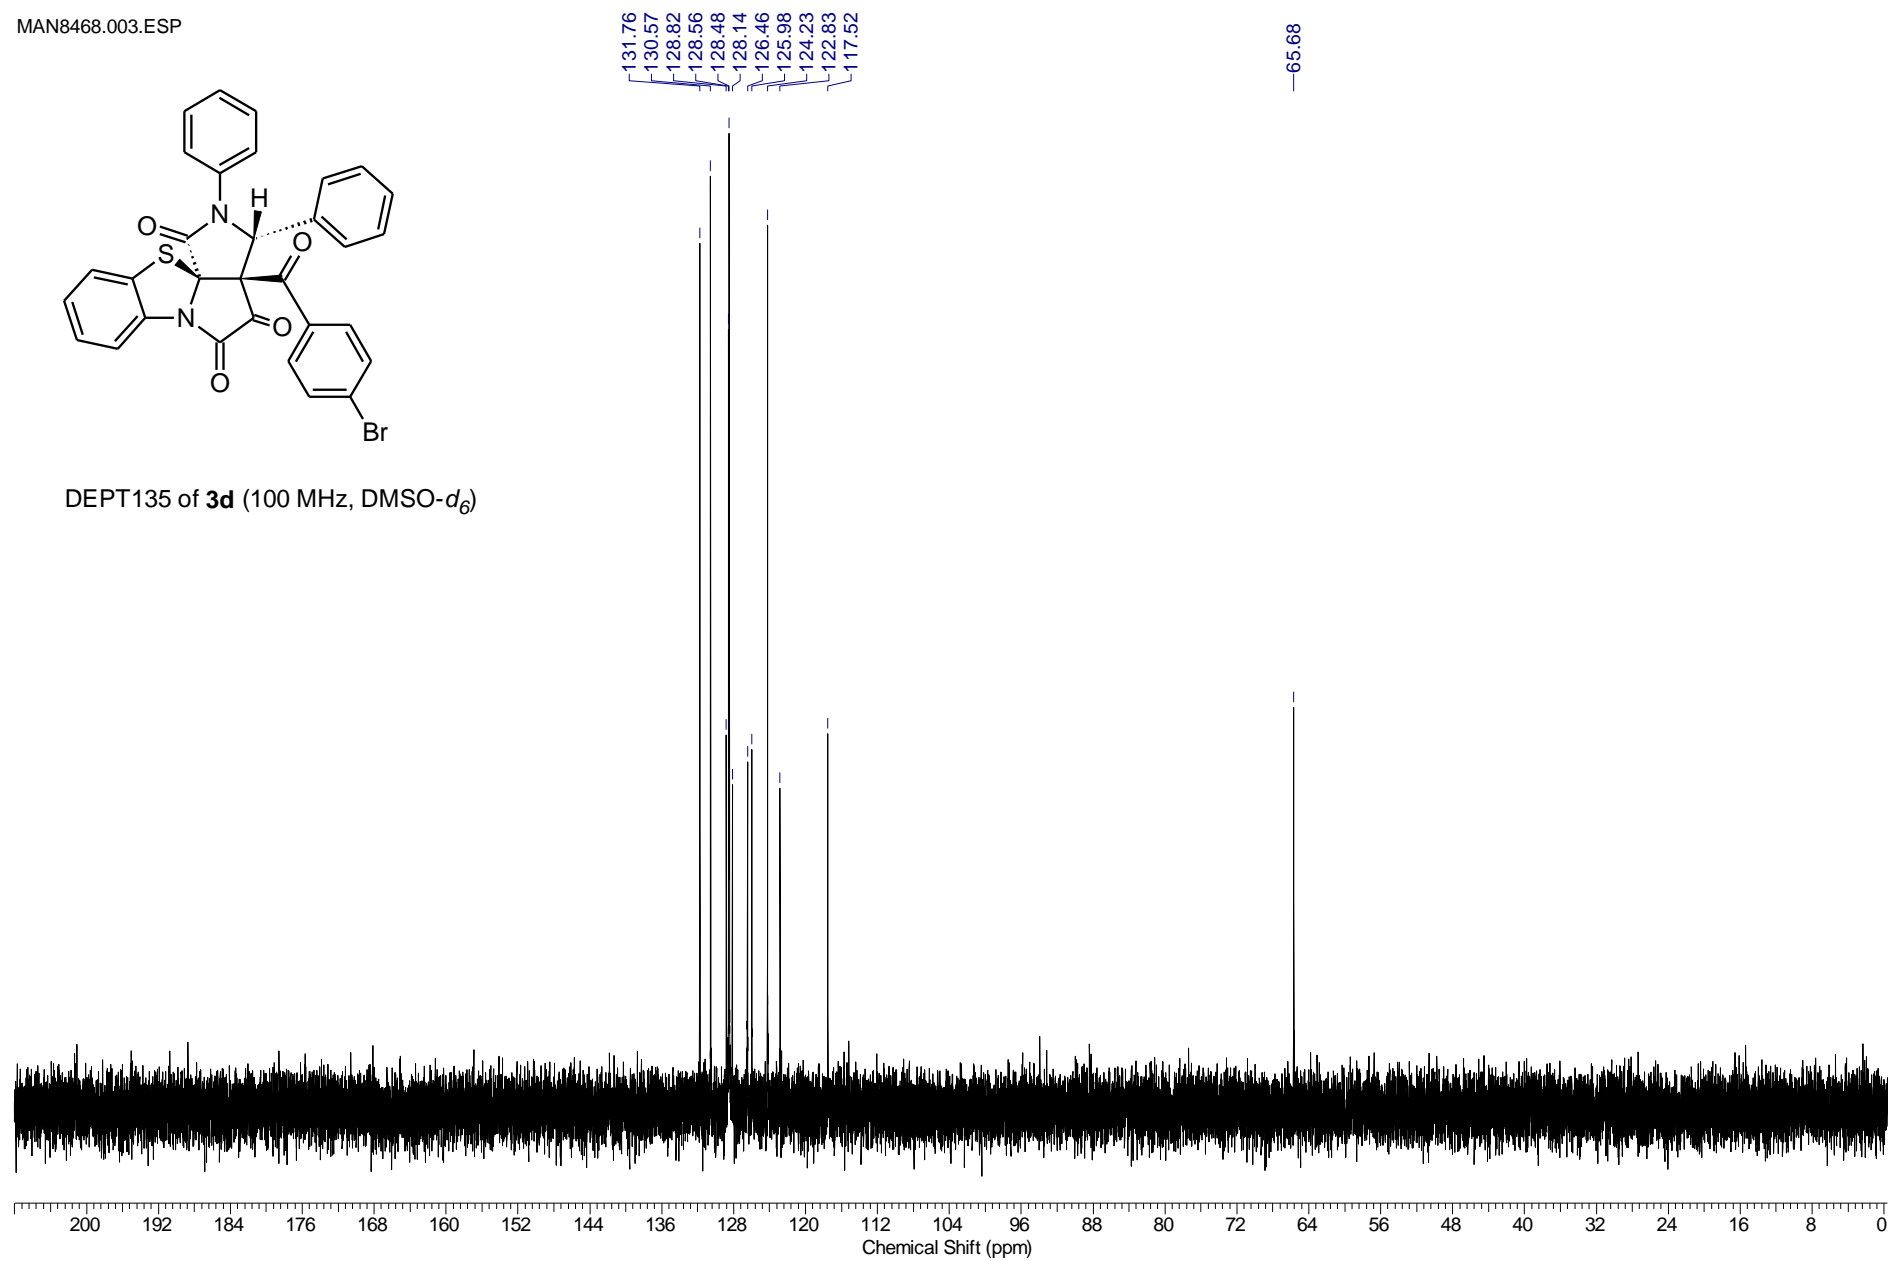

MAN8463.001.ESP

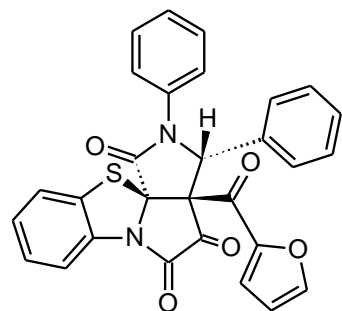

$^1\text{H}$  NMR of **3e** (400 MHz,  $\text{DMSO}-d_6$ )  
(solvate with toluene)

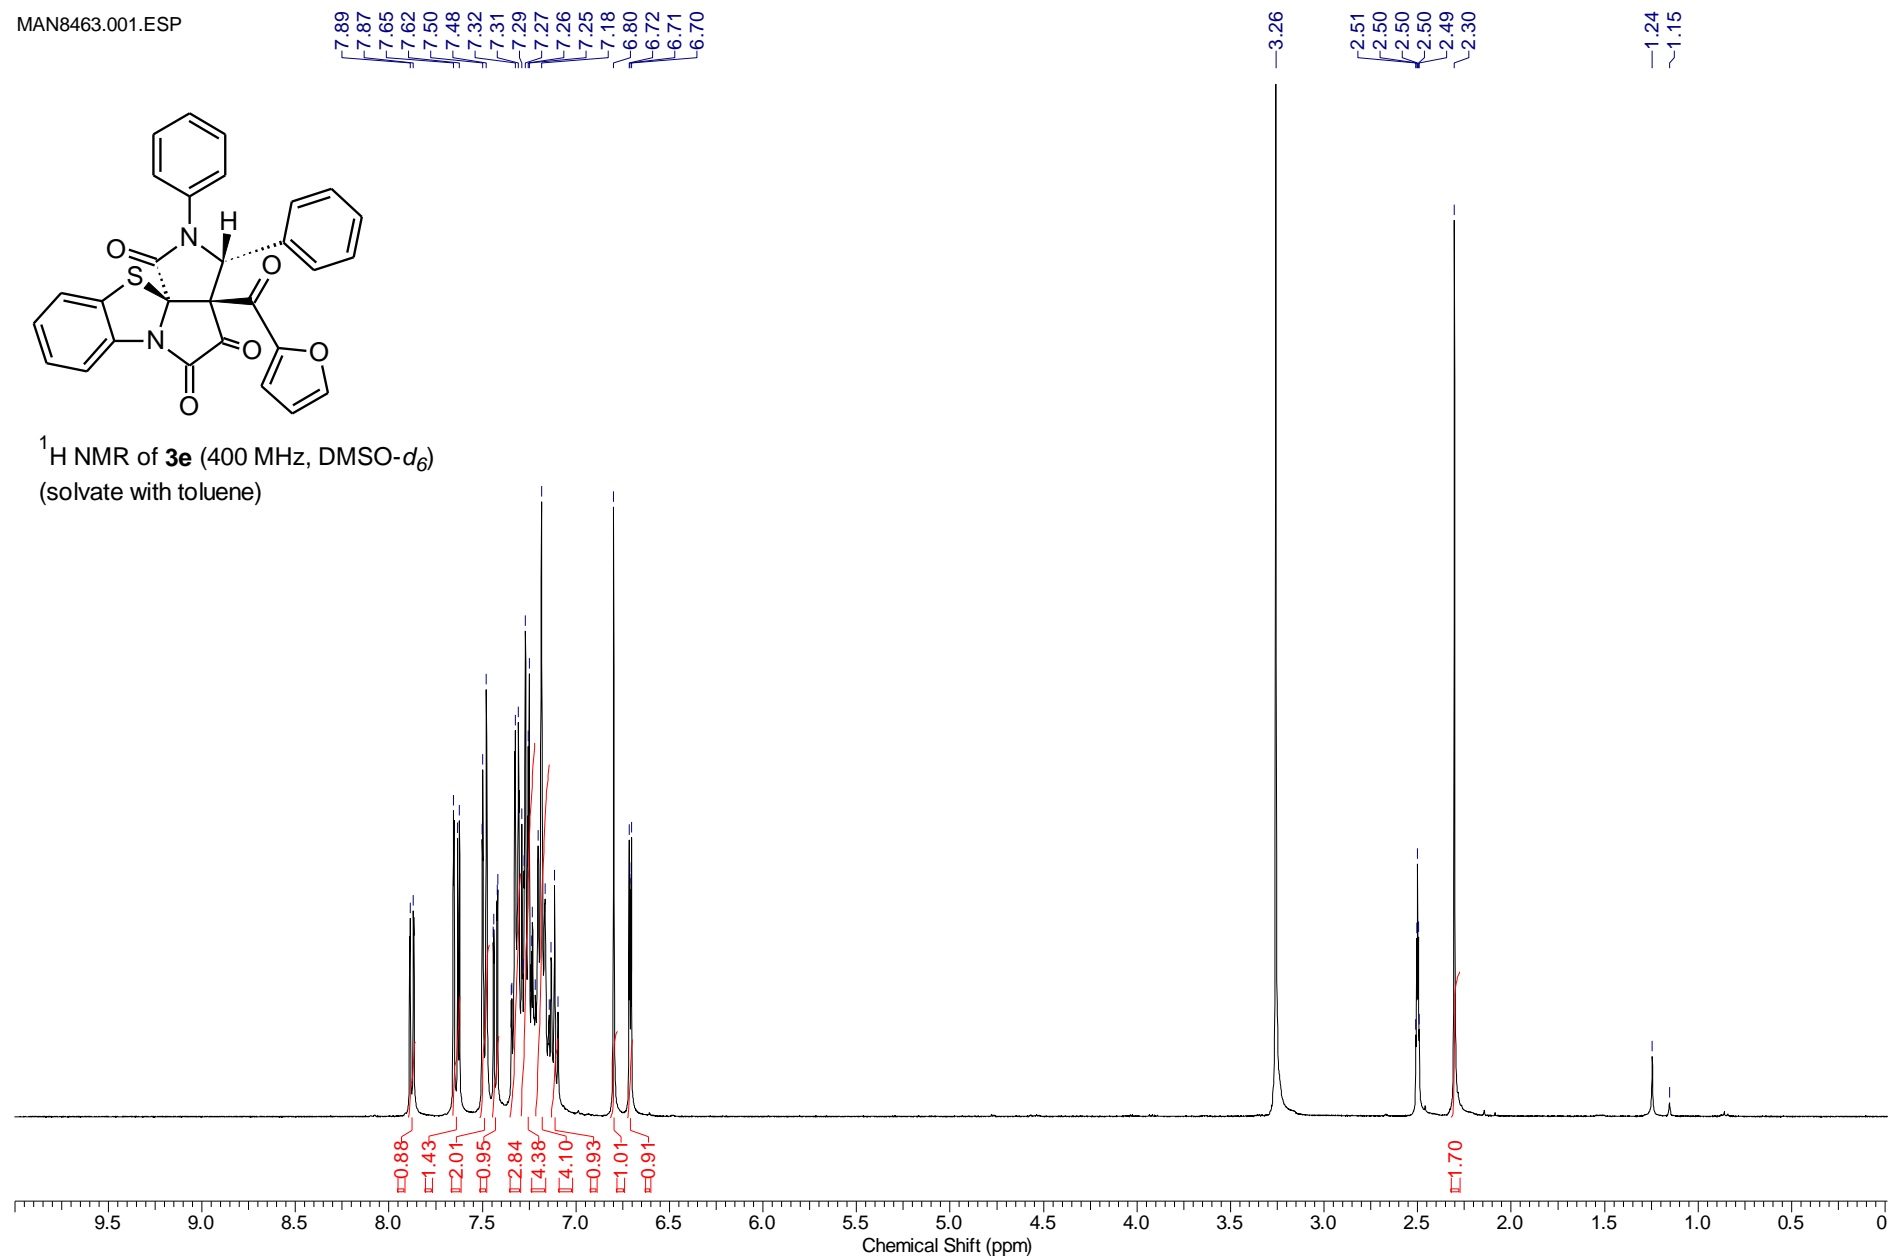



MAN8463.002.E

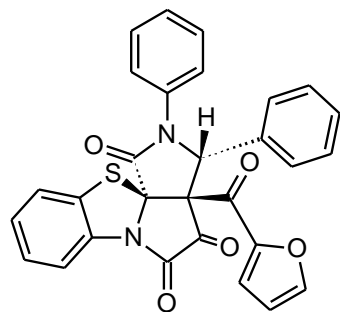

$^{13}\text{C}$  NMR of **3e** (100 MHz,  $\text{DMSO}-d_6$ )  
(solvate with toluene)

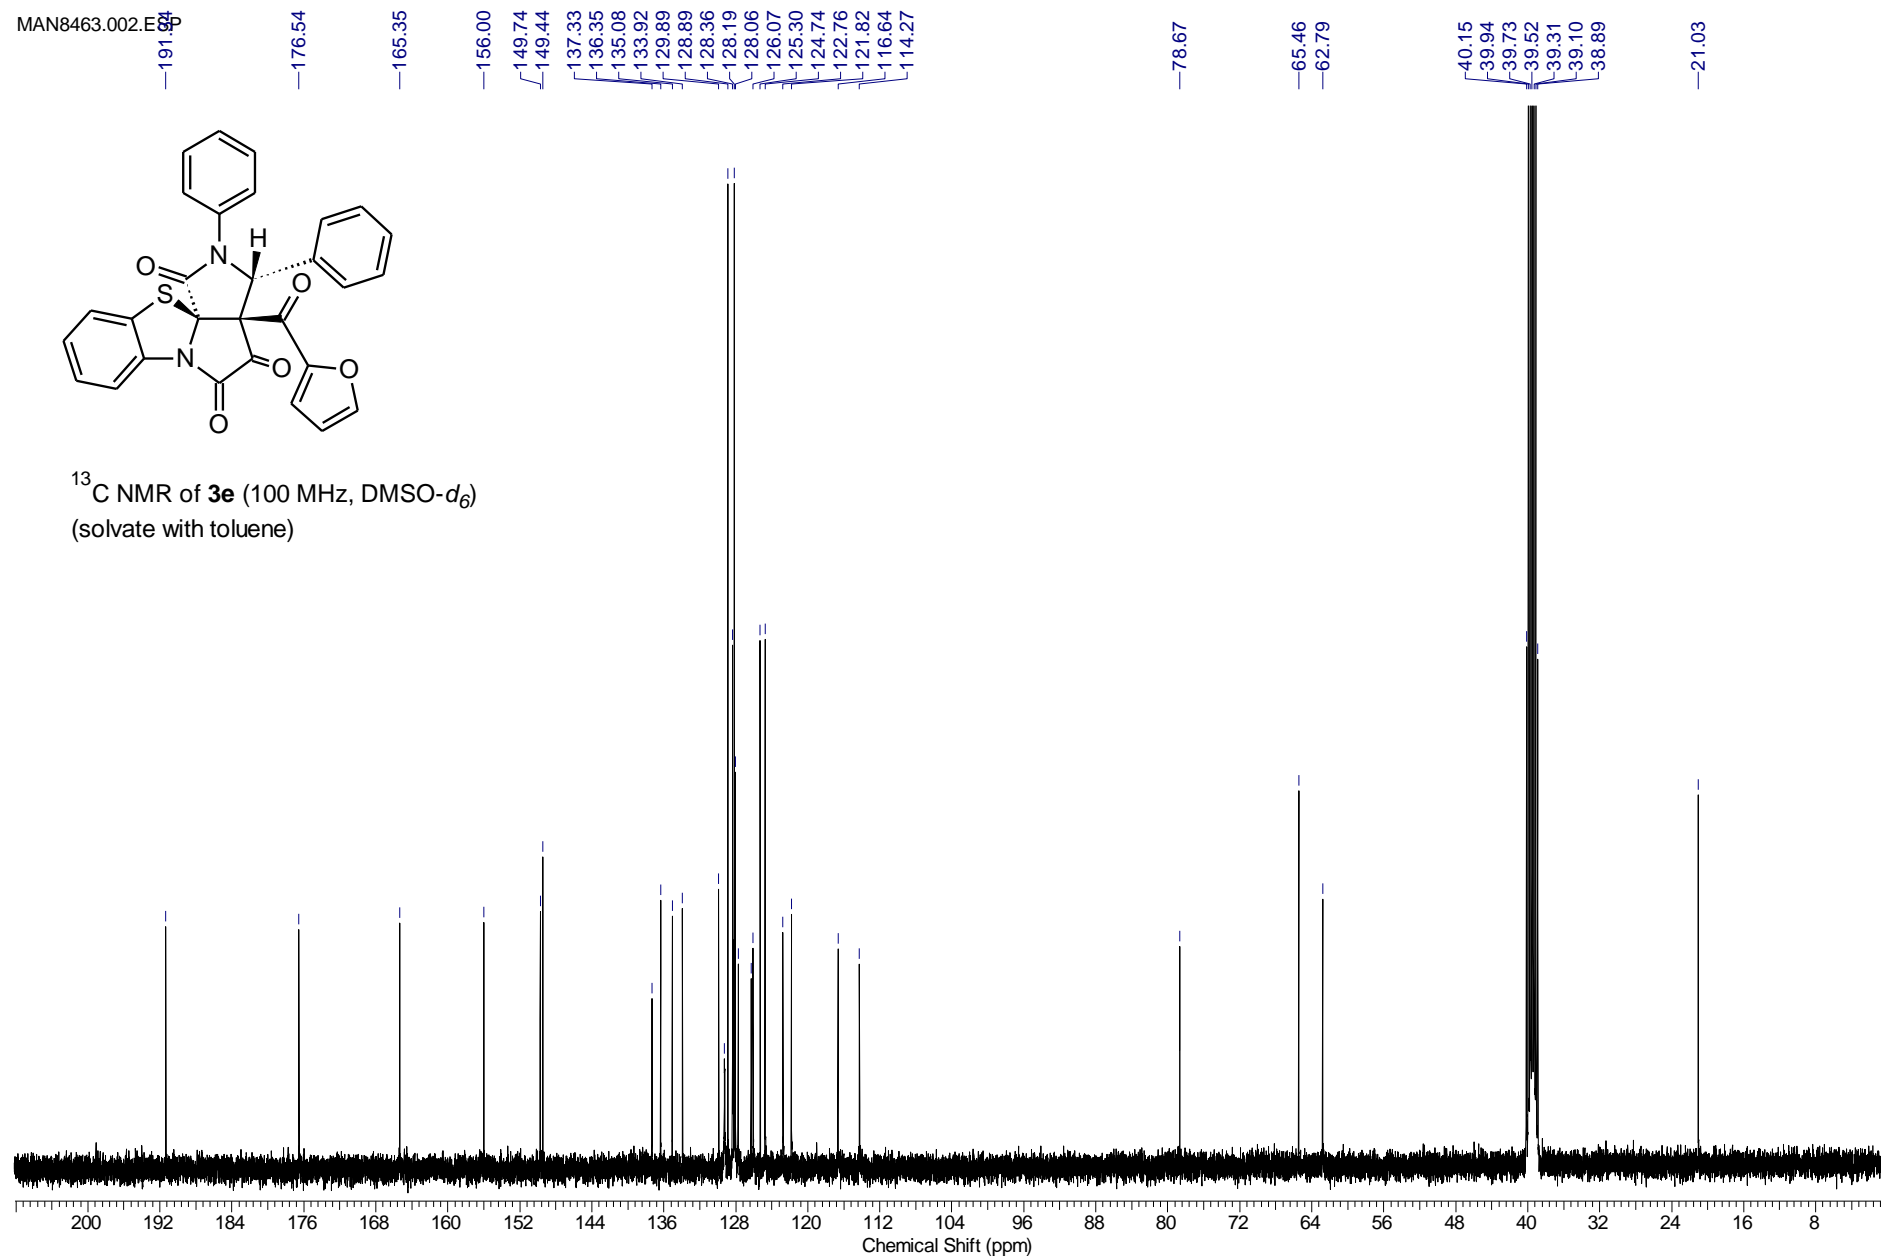

MAN8463.003.ESP

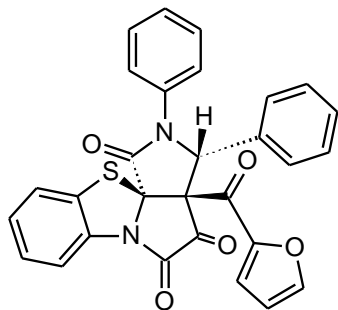

DEPT135 of **3e** (100 MHz, DMSO- $d_6$ )  
(solvate with toluene)

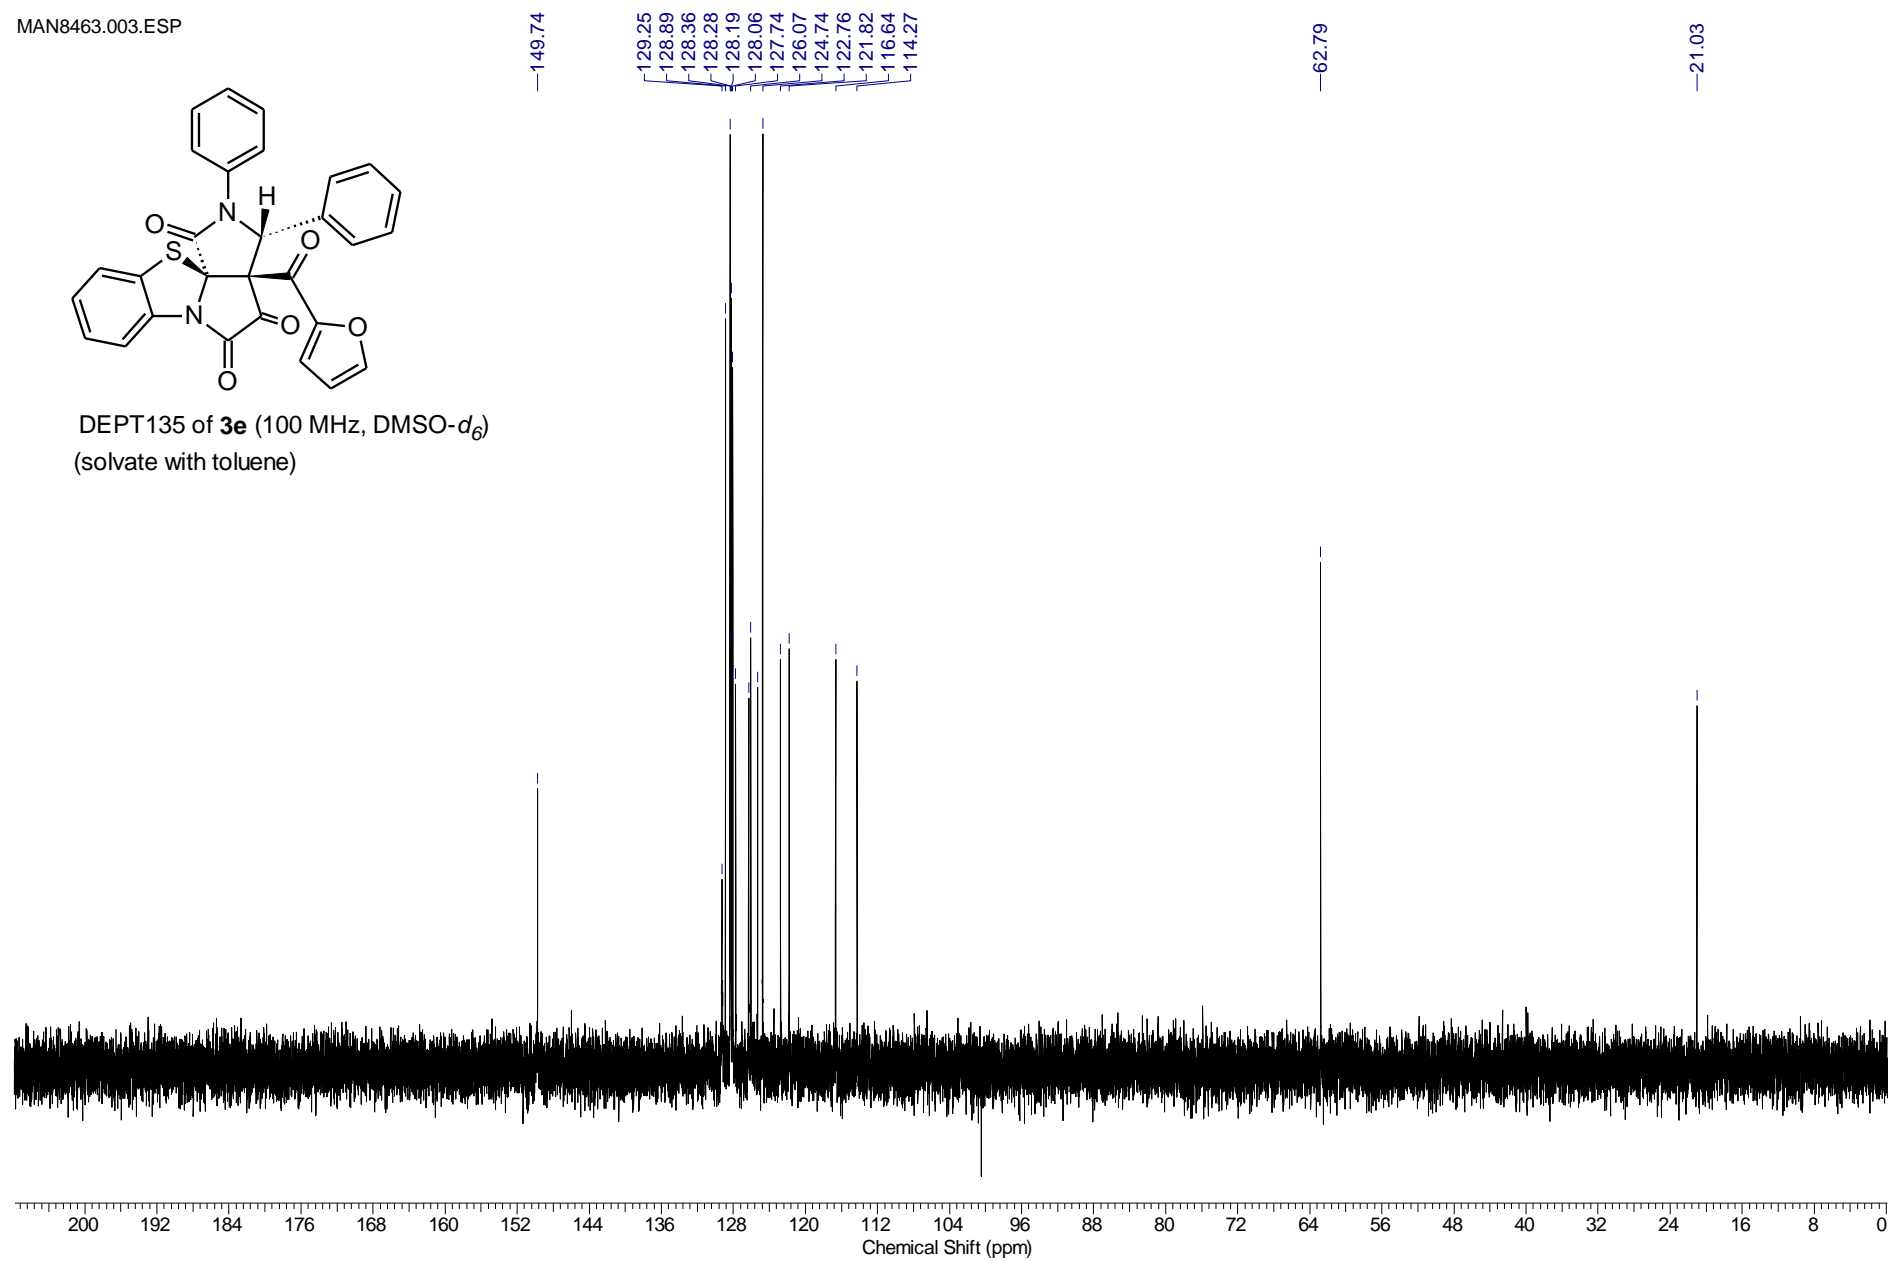

MAN8464.001.ESP

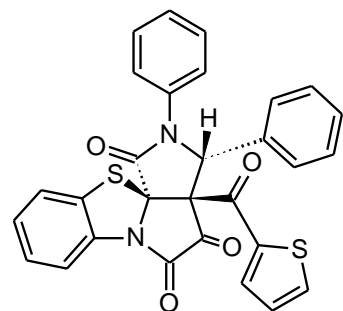

$^1\text{H}$  NMR of **3f** (400 MHz, DMSO- $d_6$ )

(solvate with toluene)

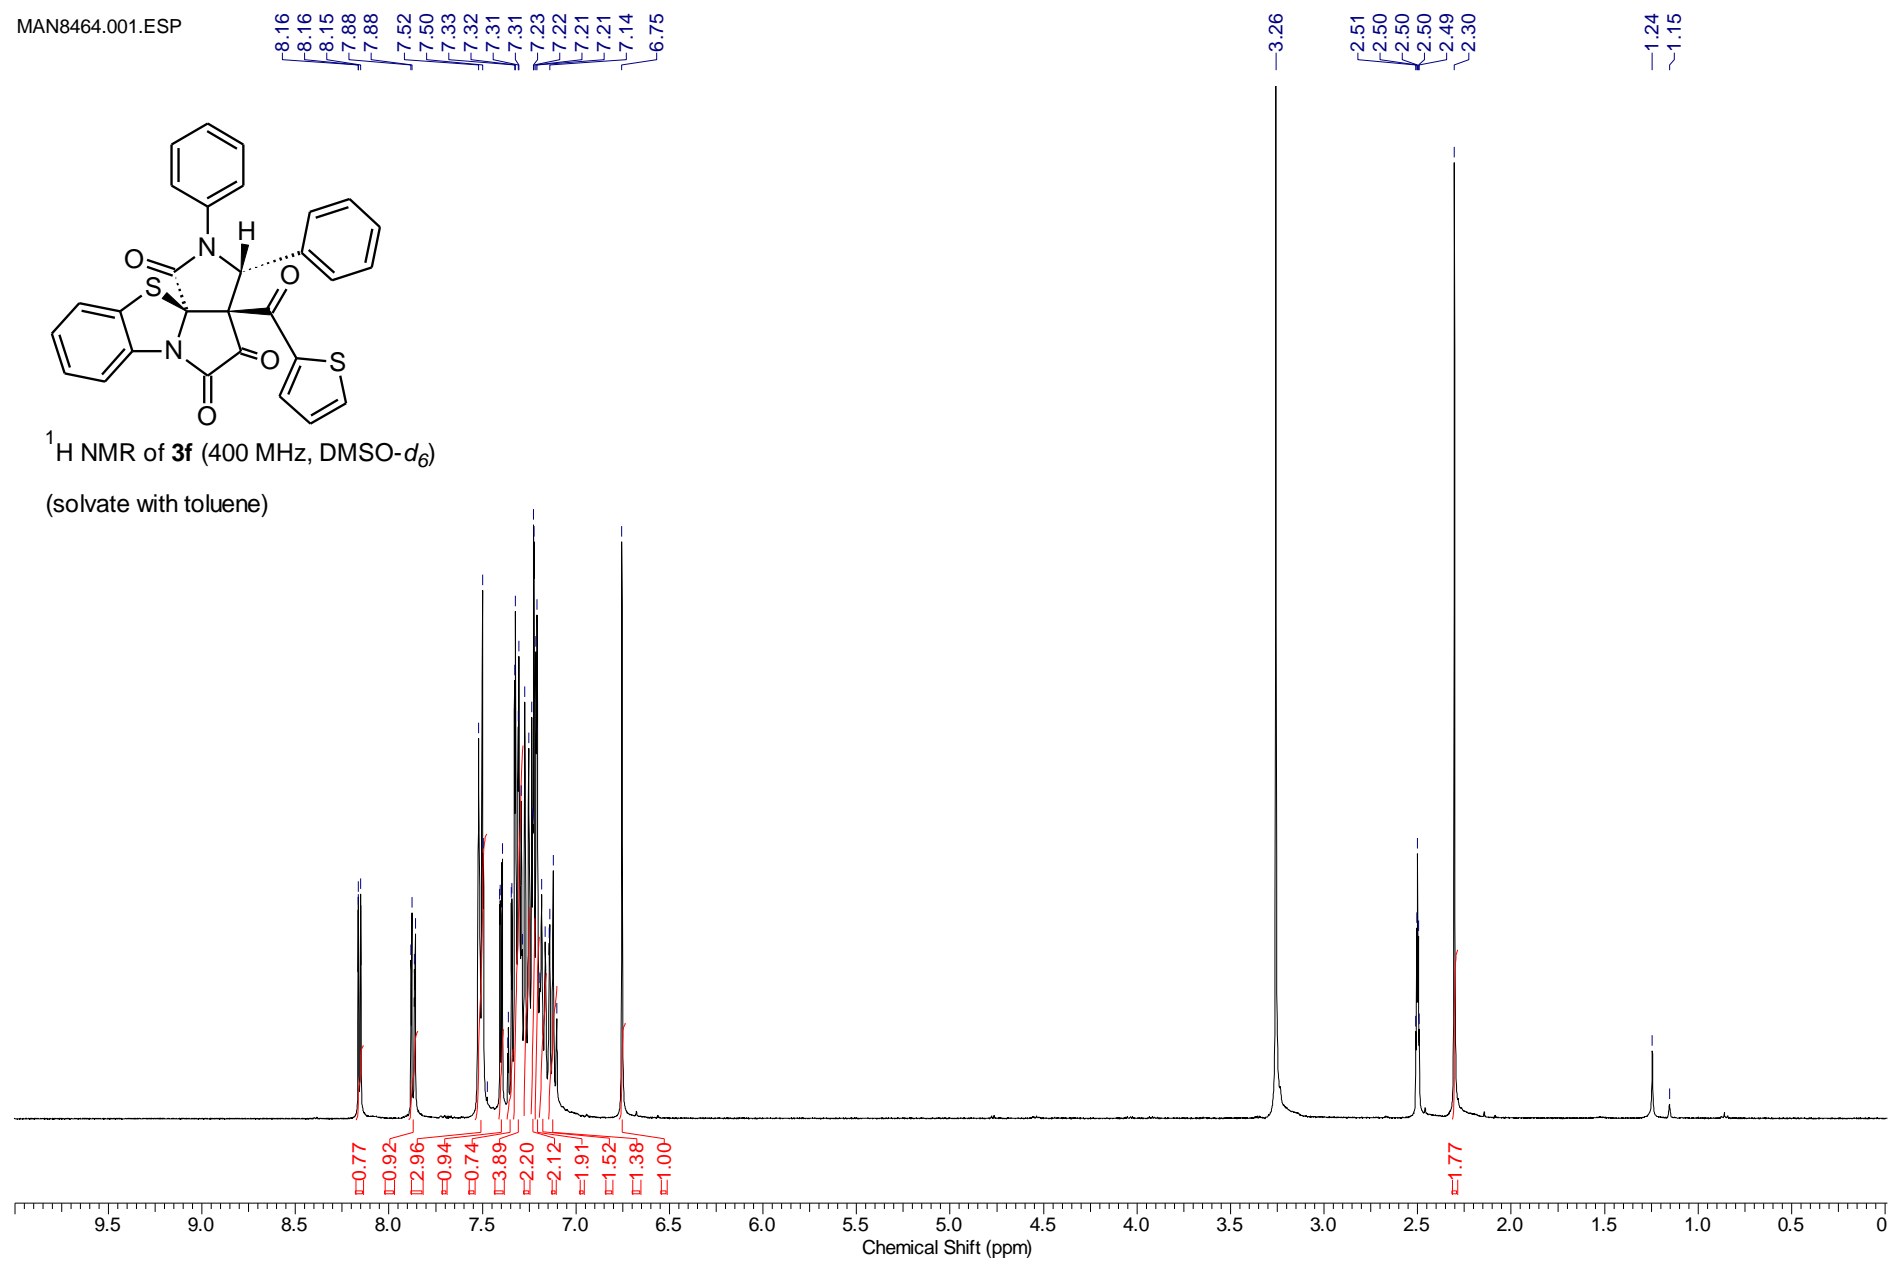

MAN8464.003.E88

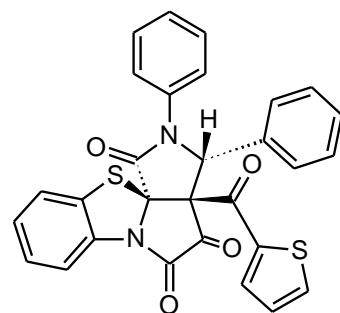

$^{13}\text{C}$  NMR of **3f** (100 MHz, DMSO- $d_6$ )

(solvate with toluene)

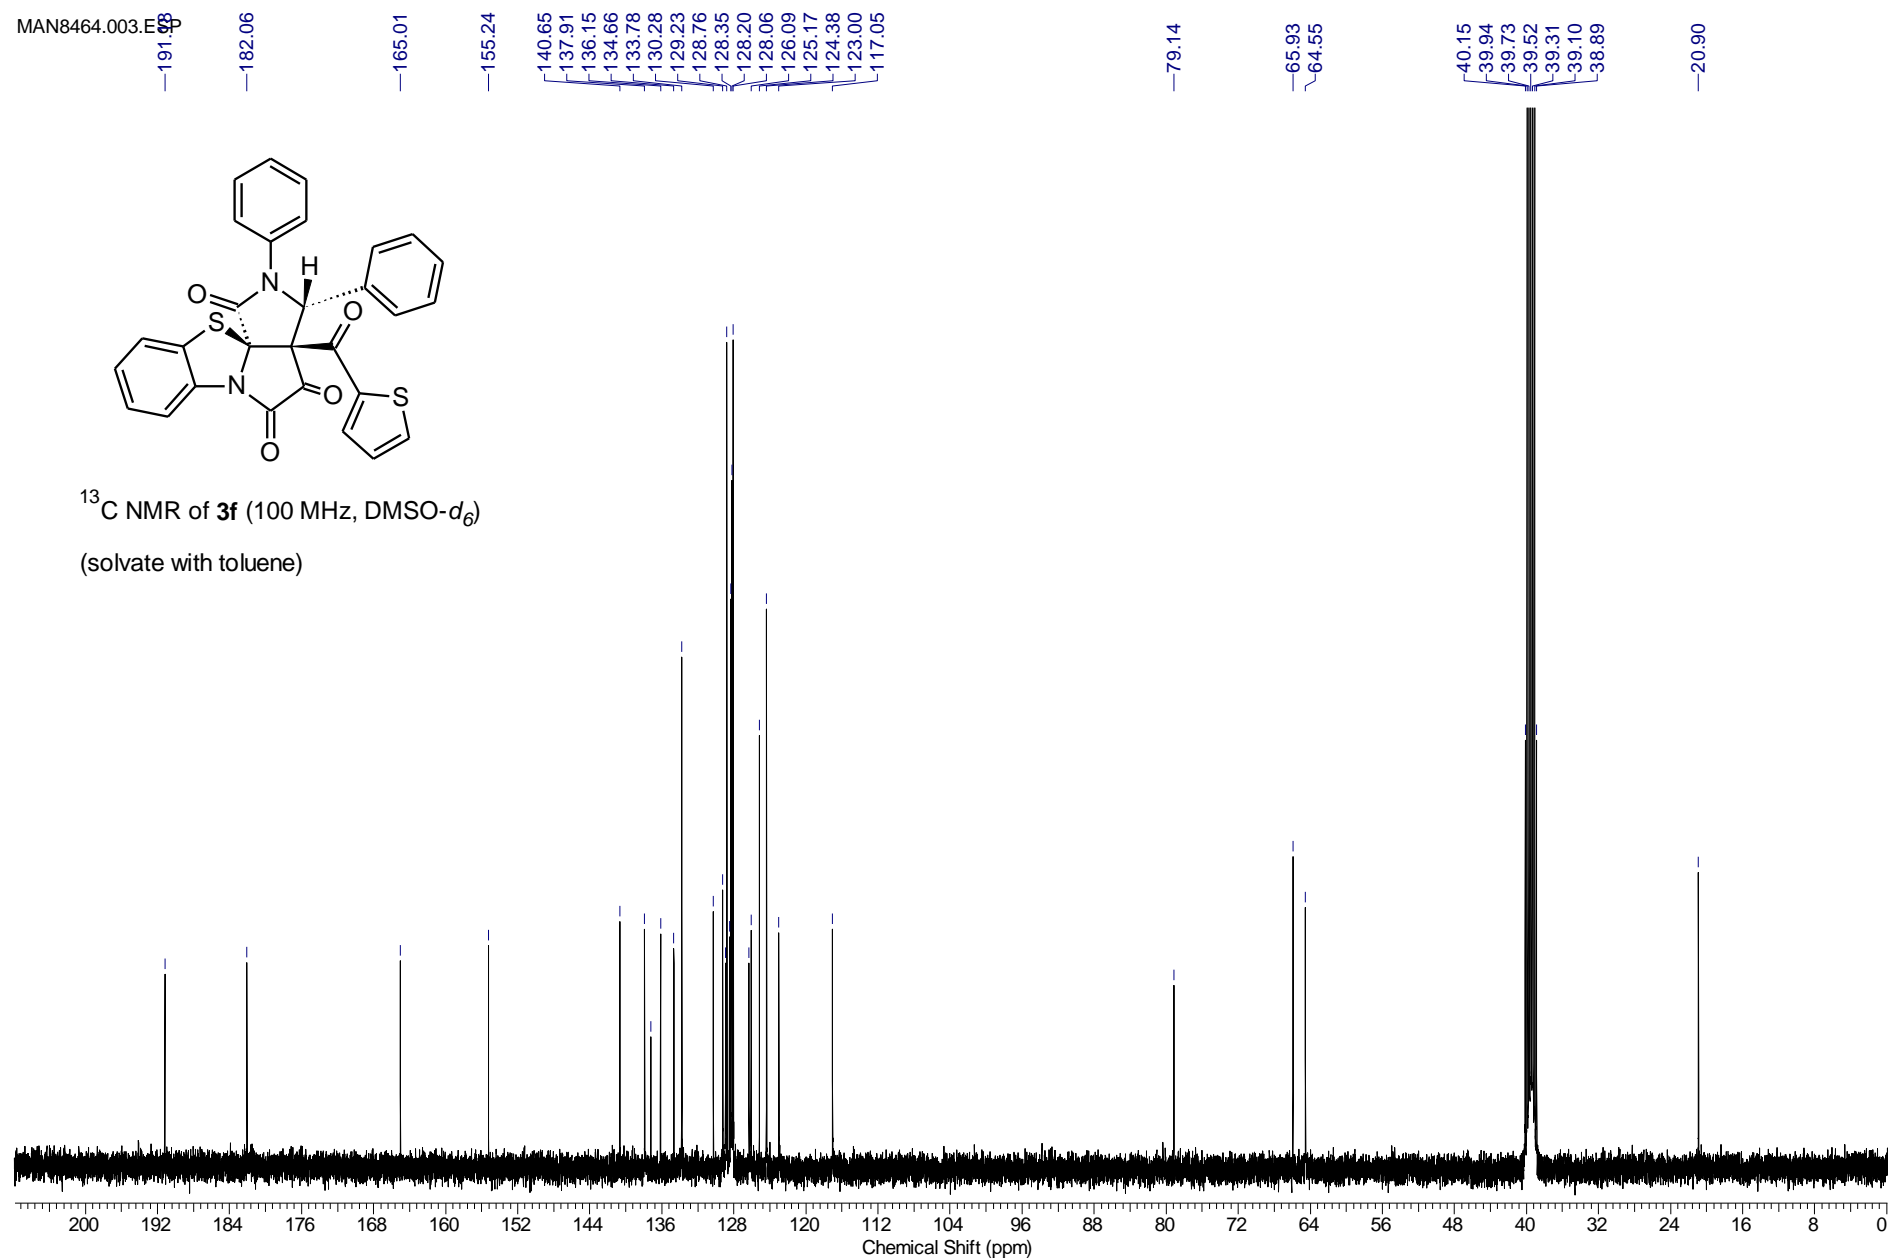

MAN8464.004.ESP

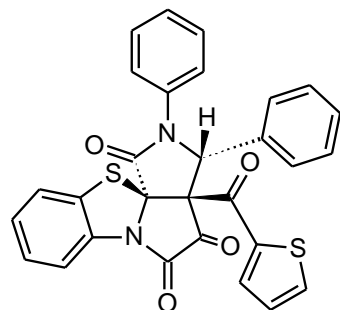

DEPT135 of **3f** (100 MHz, DMSO- $d_6$ )  
(solvate with toluene)

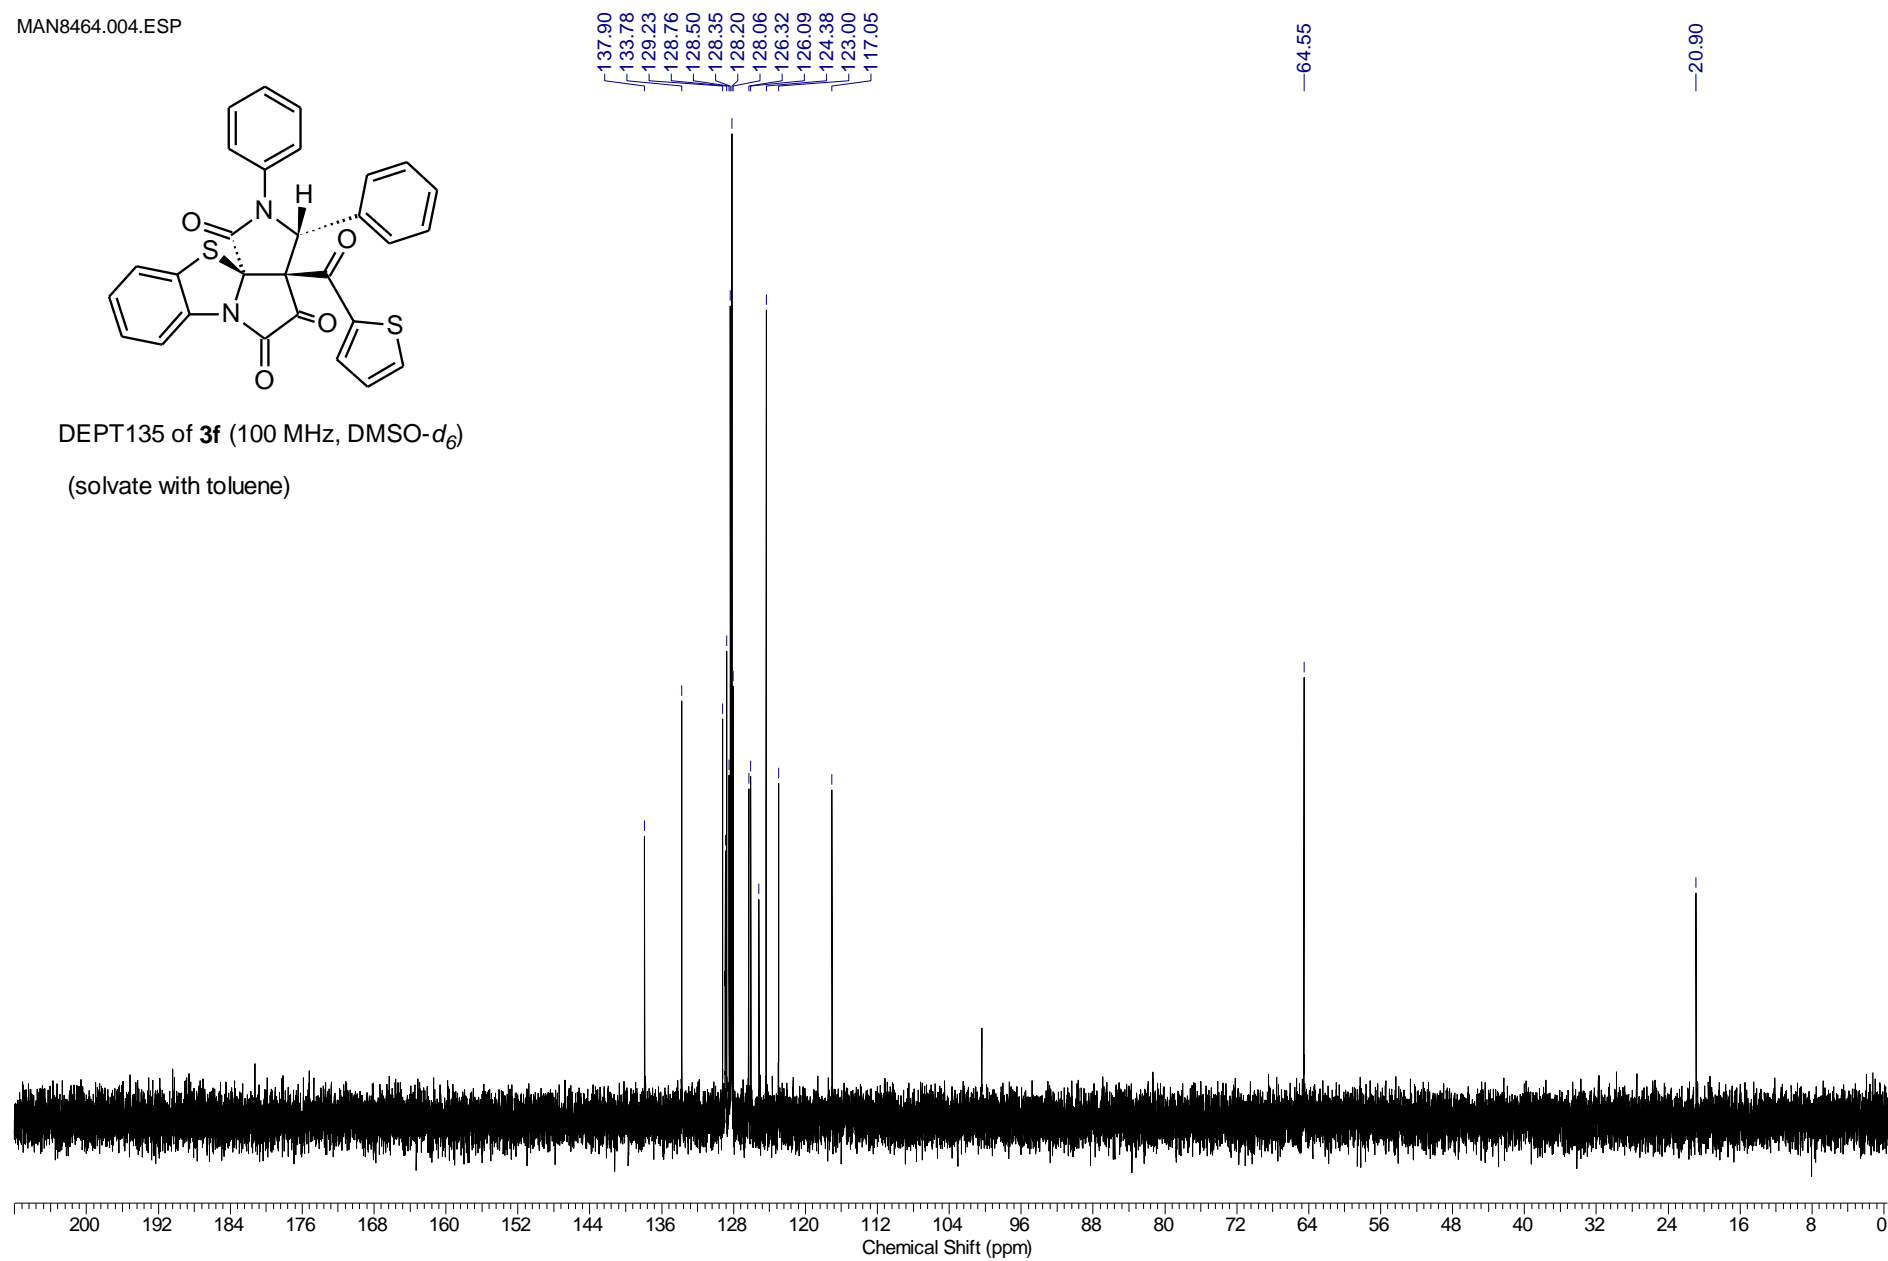

MAN8439.006.esp

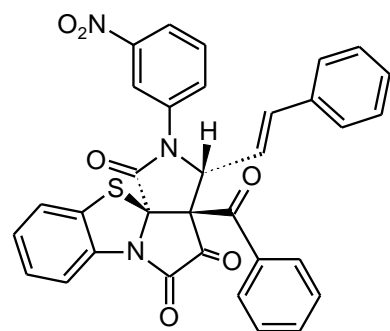

$^1\text{H}$  NMR of **3g** (400 MHz,  $\text{DMSO}-d_6$ )

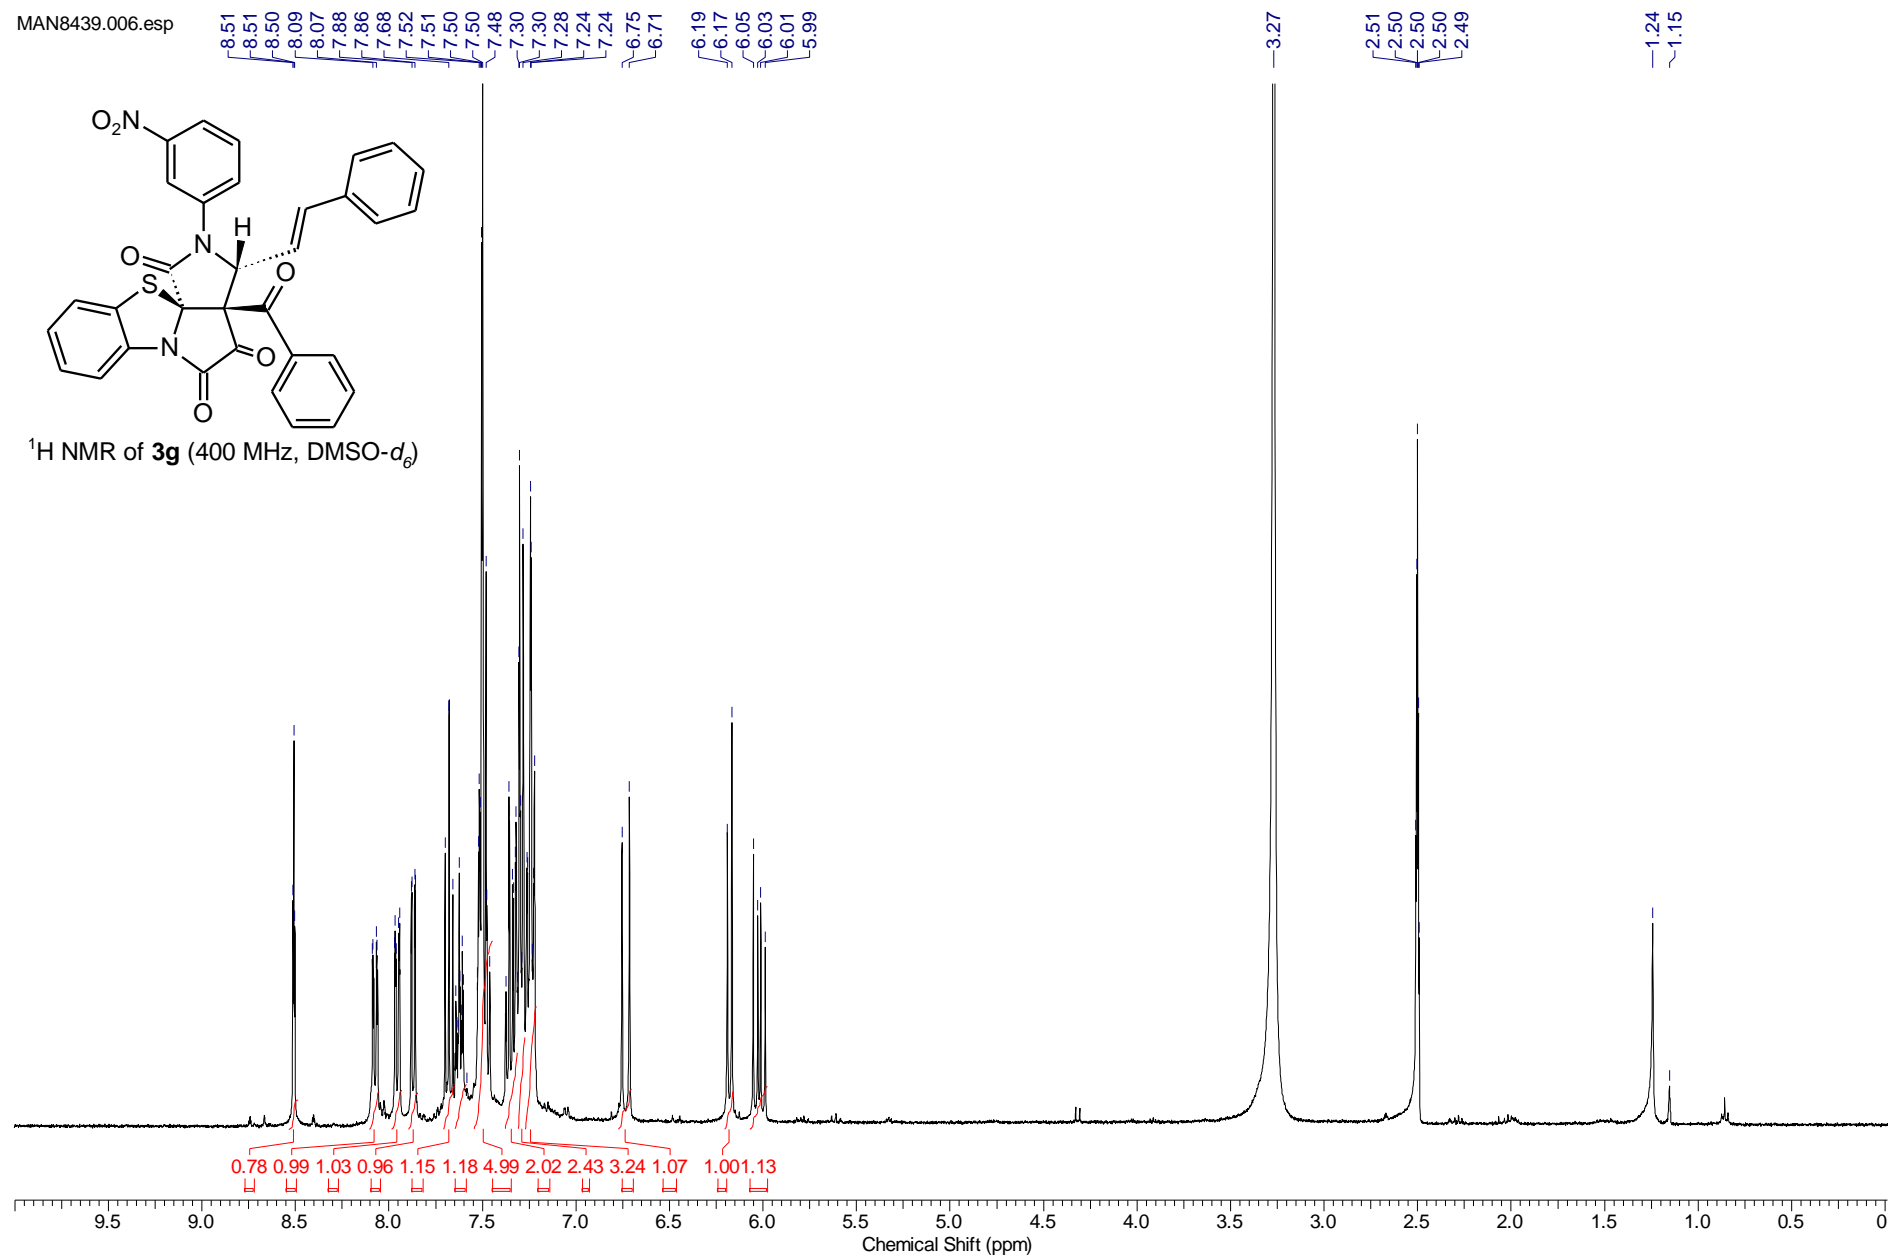

MAN8439.00 71.88 P

193.88  
191.88

165.44

156.13

147.93

137.48

136.48

135.98

135.27

134.09

132.48

130.35

129.55

129.22

128.55

127.07

124.23

123.60

121.63

117.06

78.92

66.75

64.21

40.64

40.43

40.22

40.01

39.80

39.59

39.38

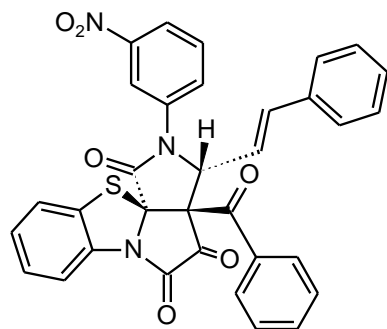

<sup>13</sup>C NMR of **3g** (100 MHz, DMSO-*d*<sub>6</sub>)

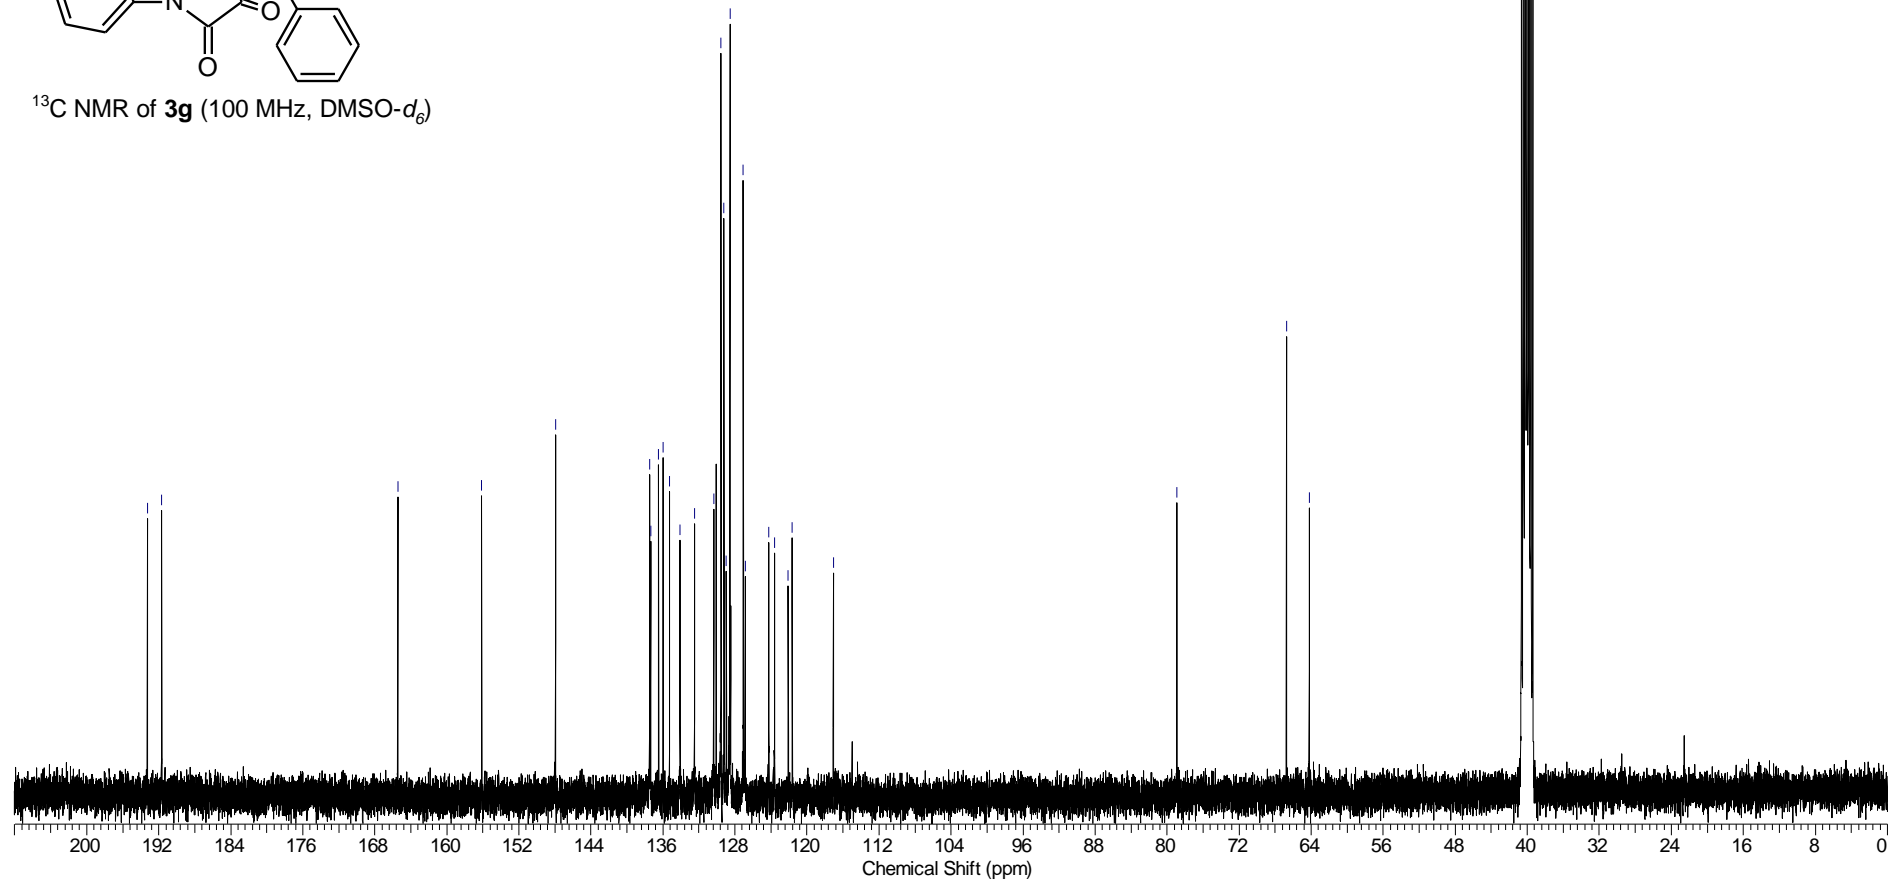

MAN8439.008.esp

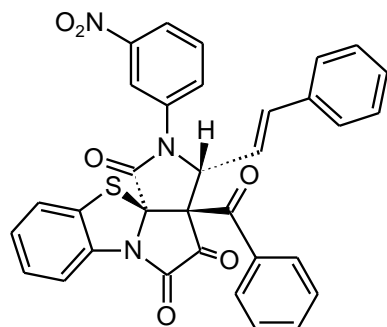

DEPT135 of **3g** (100 MHz,  $\text{DMSO}-d_6$ )

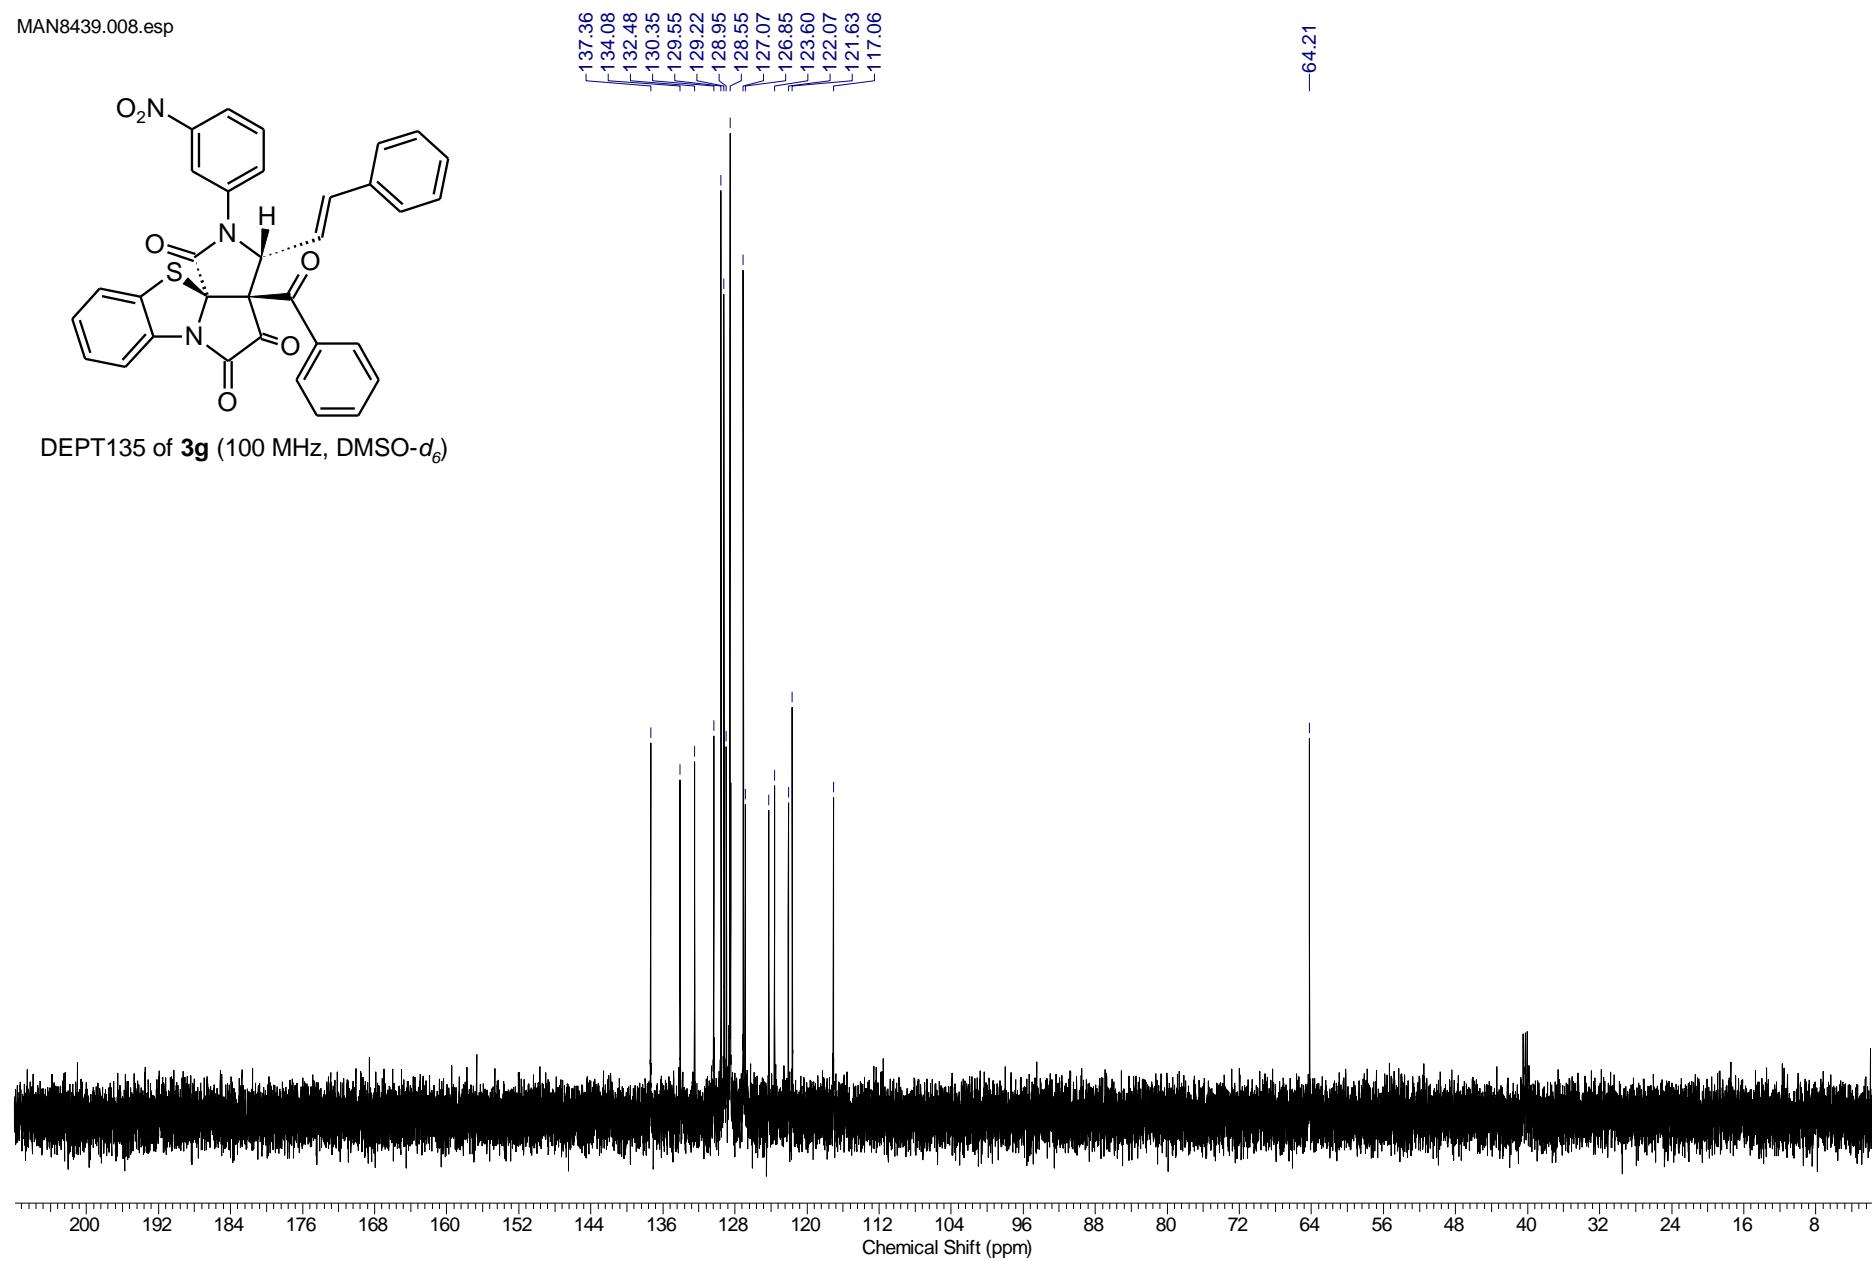



MAN8472.001.ESP

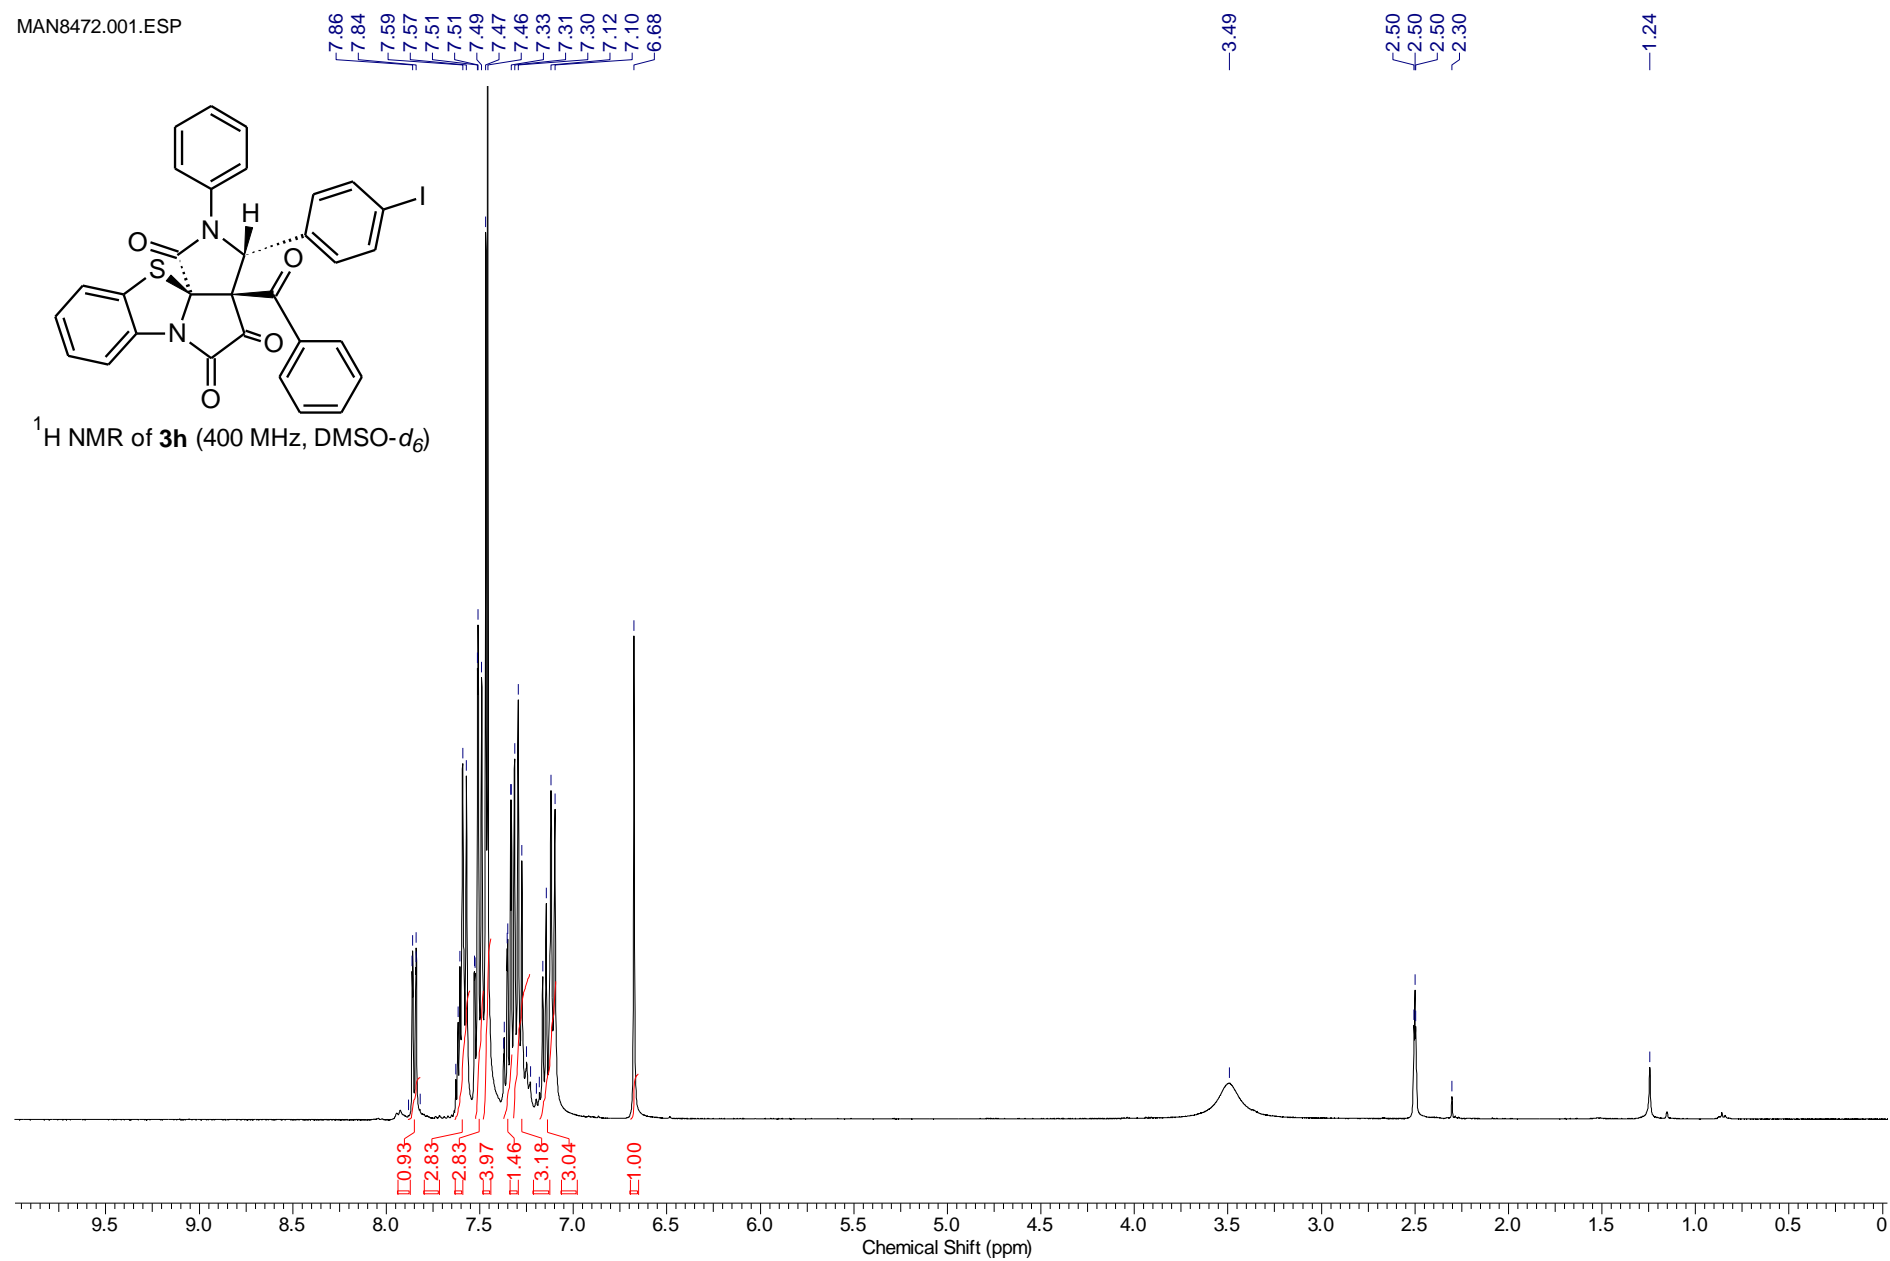

MAN8472.002-150P

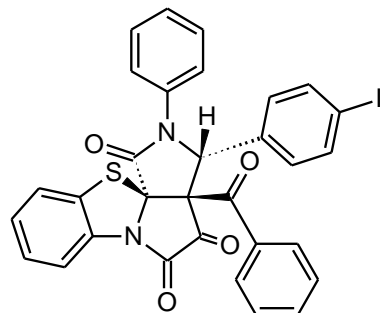

$^{13}\text{C}$  NMR of **3h** (100 MHz,  $\text{DMSO}-d_6$ )

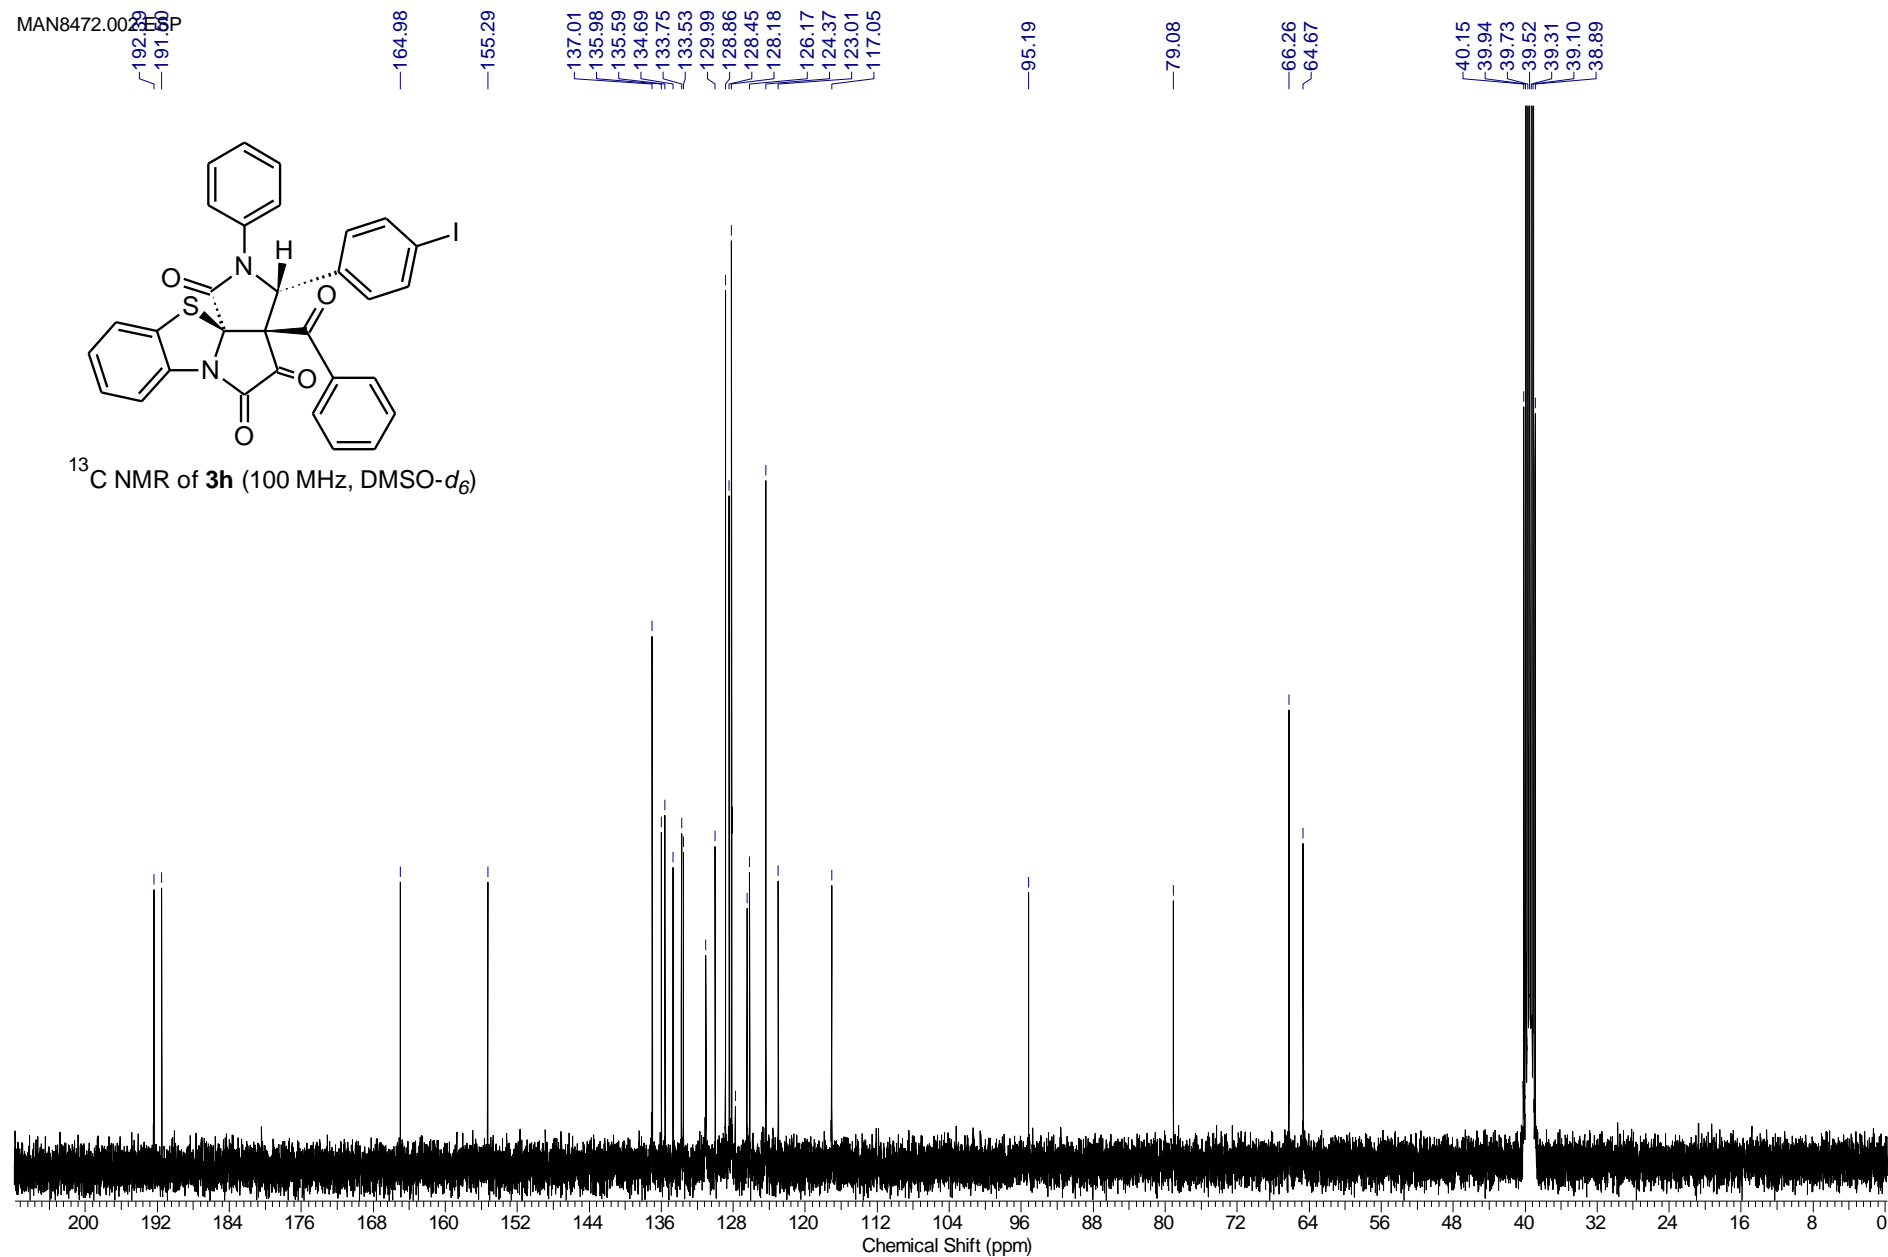

MAN8472.003.ESP

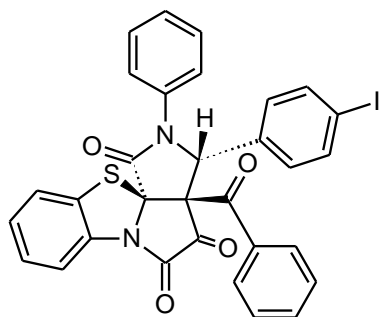

DEPT135 of **3h** (100 MHz, DMSO- $d_6$ )

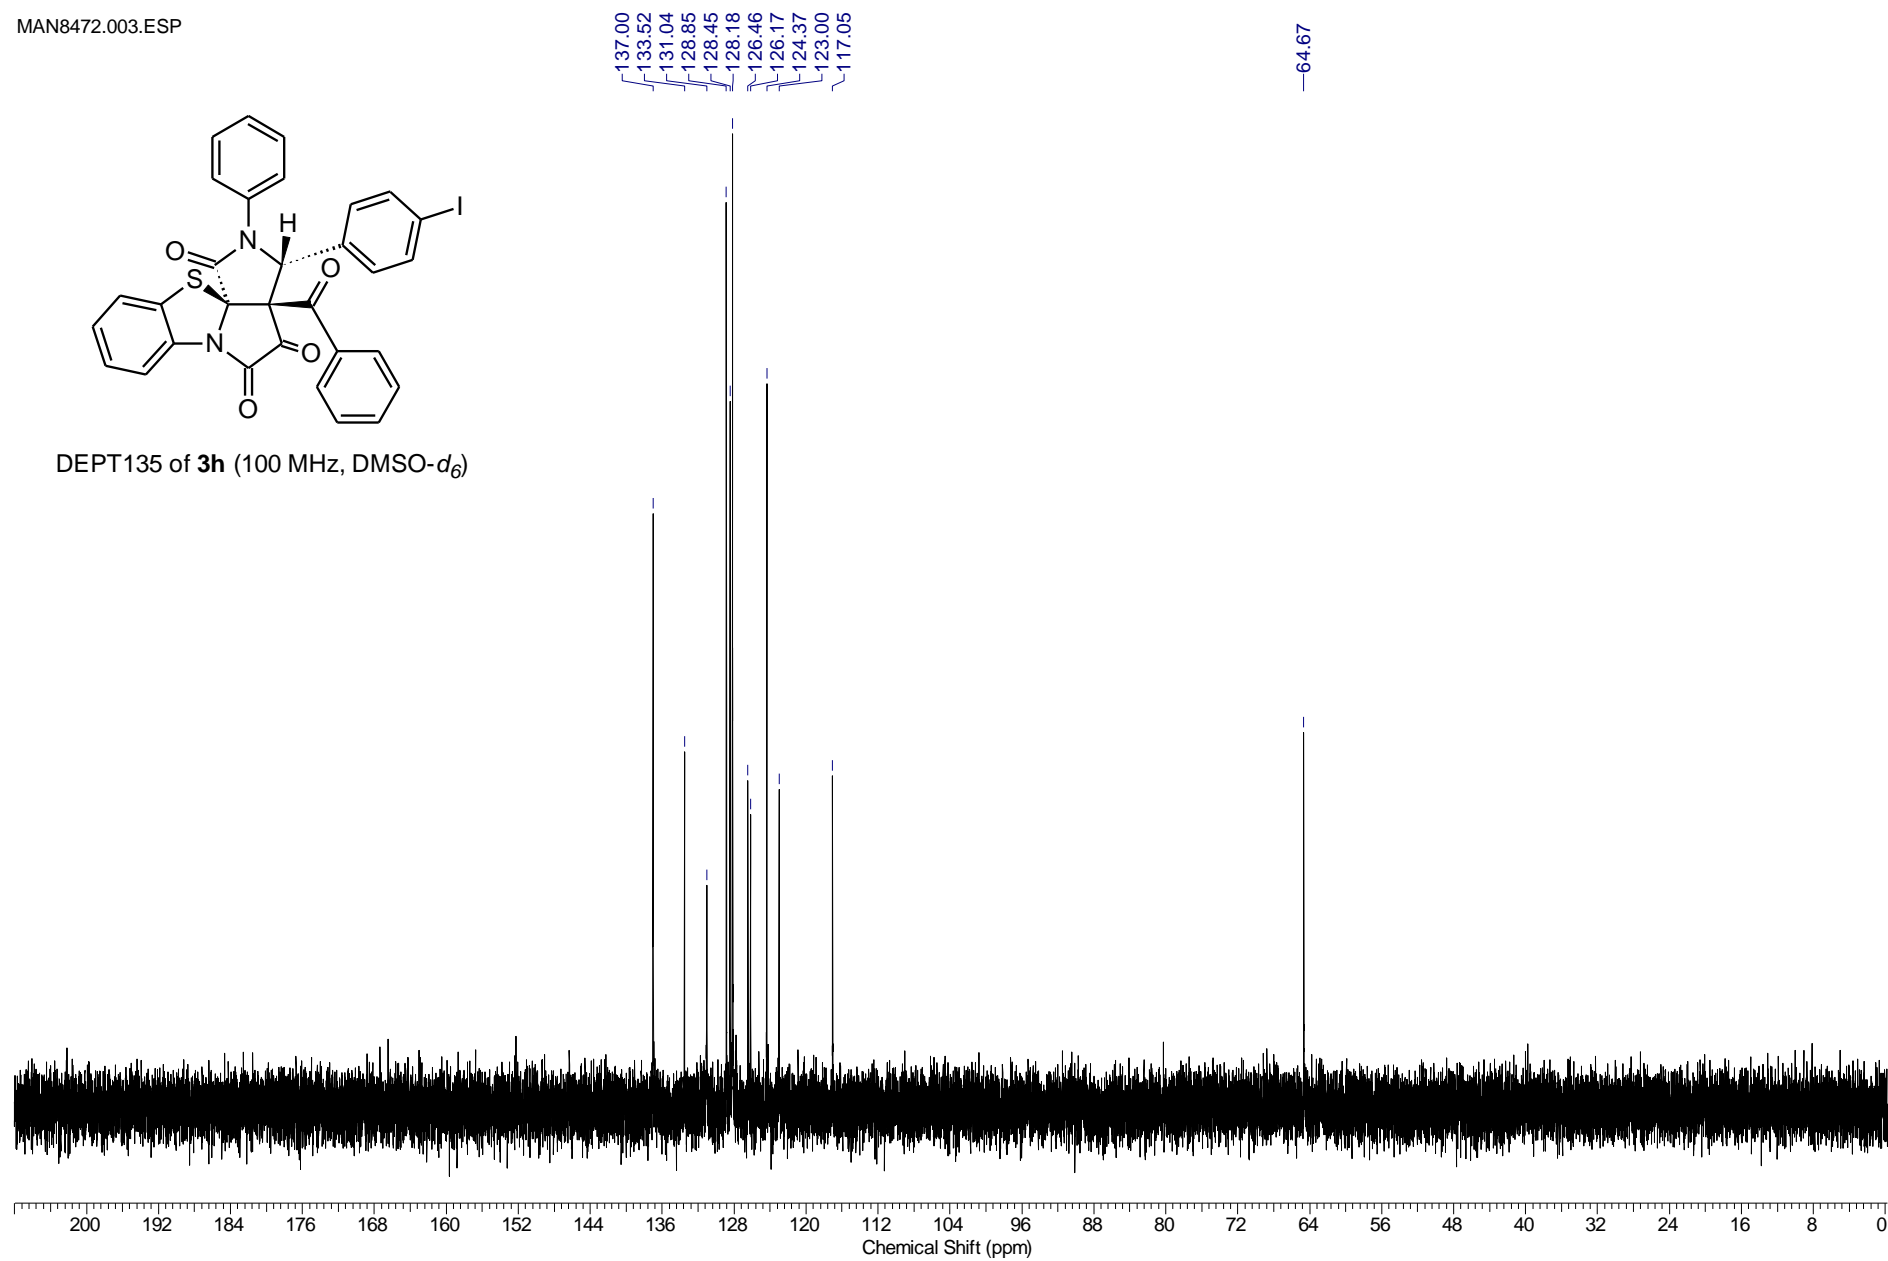

MAN8437.001.ESP

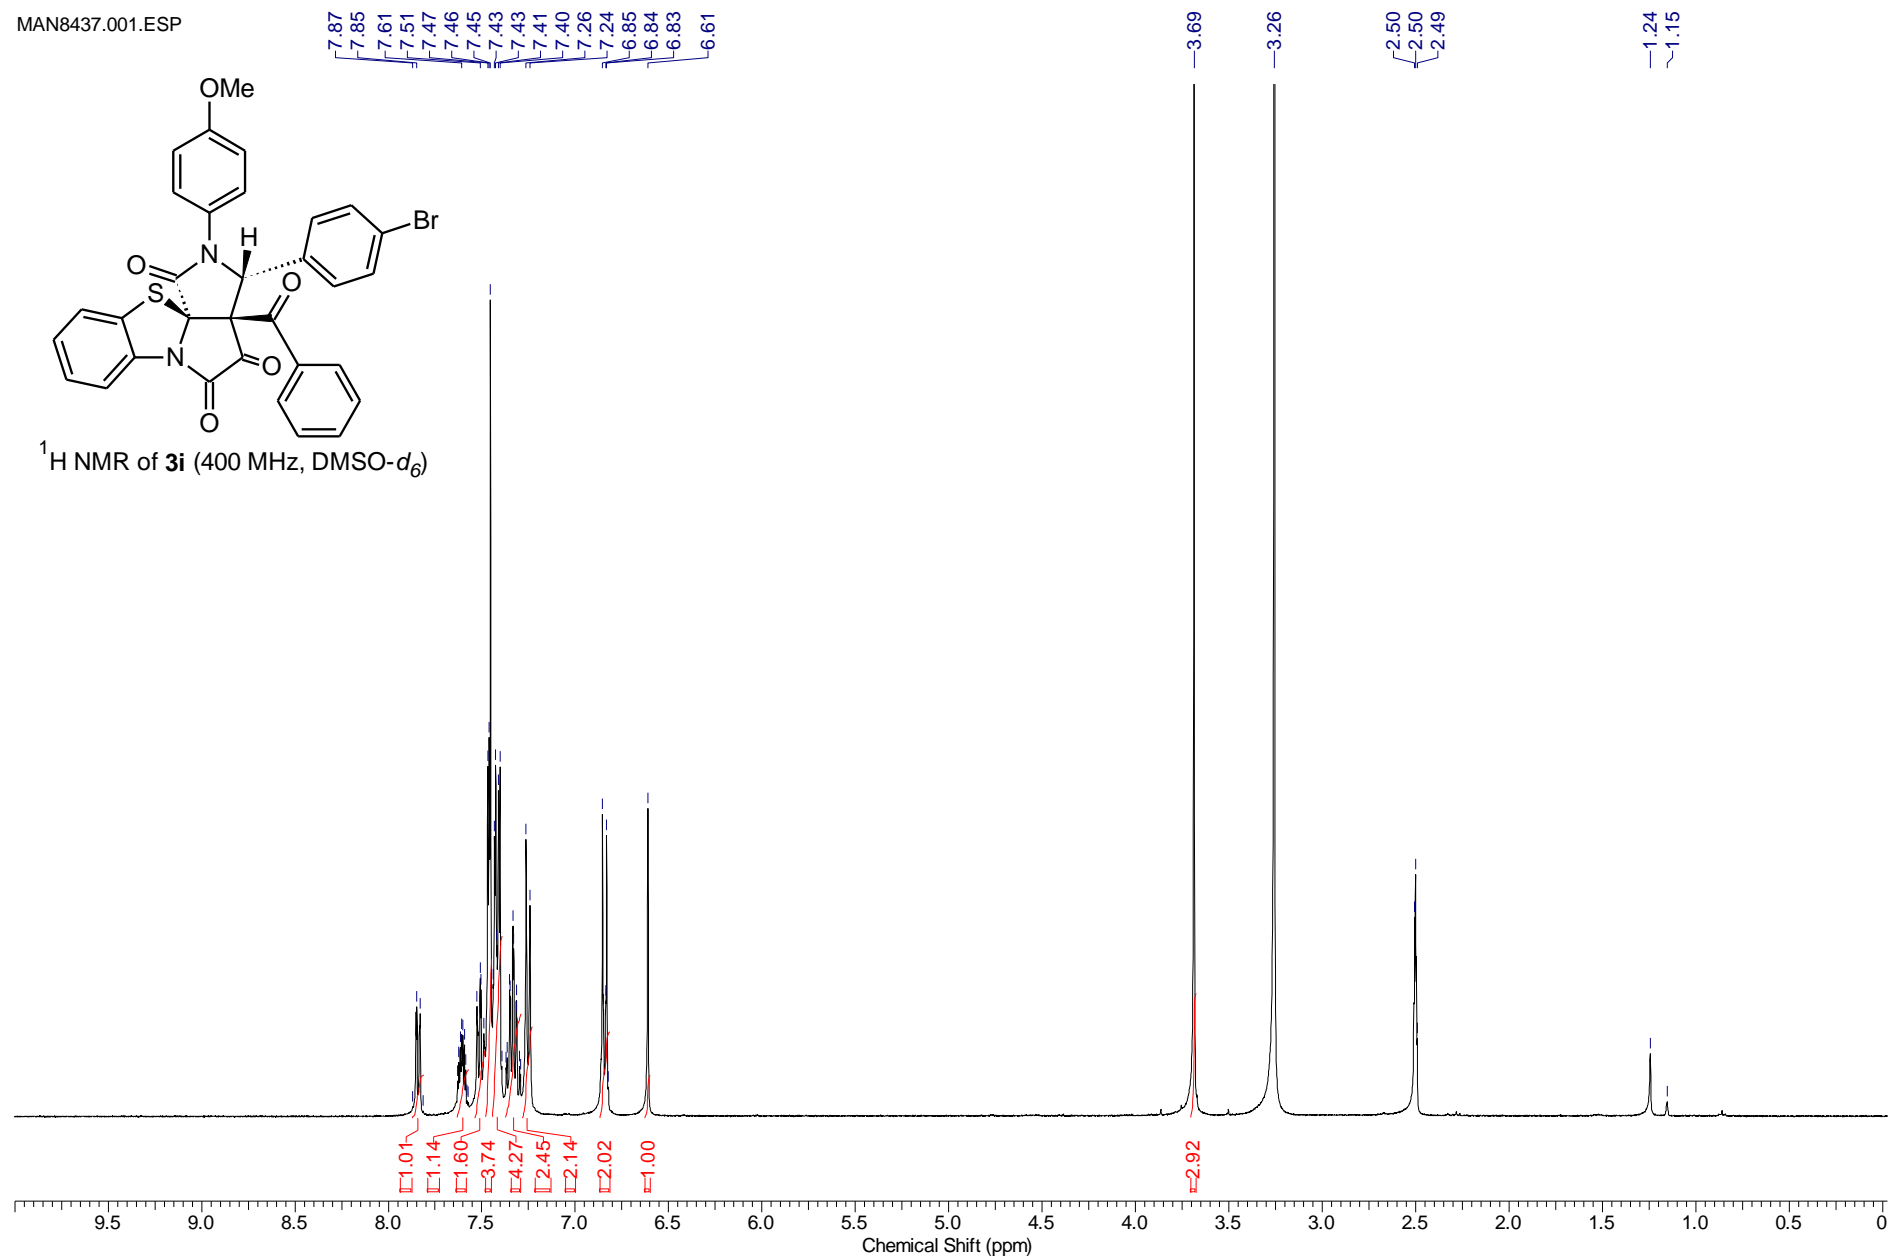

MAN8437.002.f5

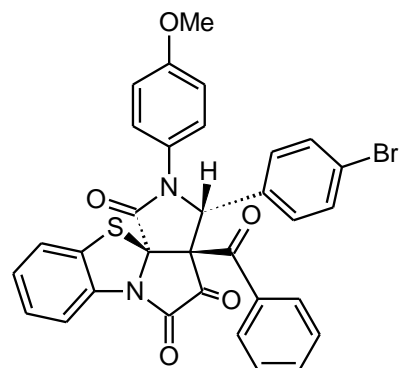

$^{13}\text{C}$  NMR of **3i** (100 MHz,  $\text{DMSO-}d_6$ )

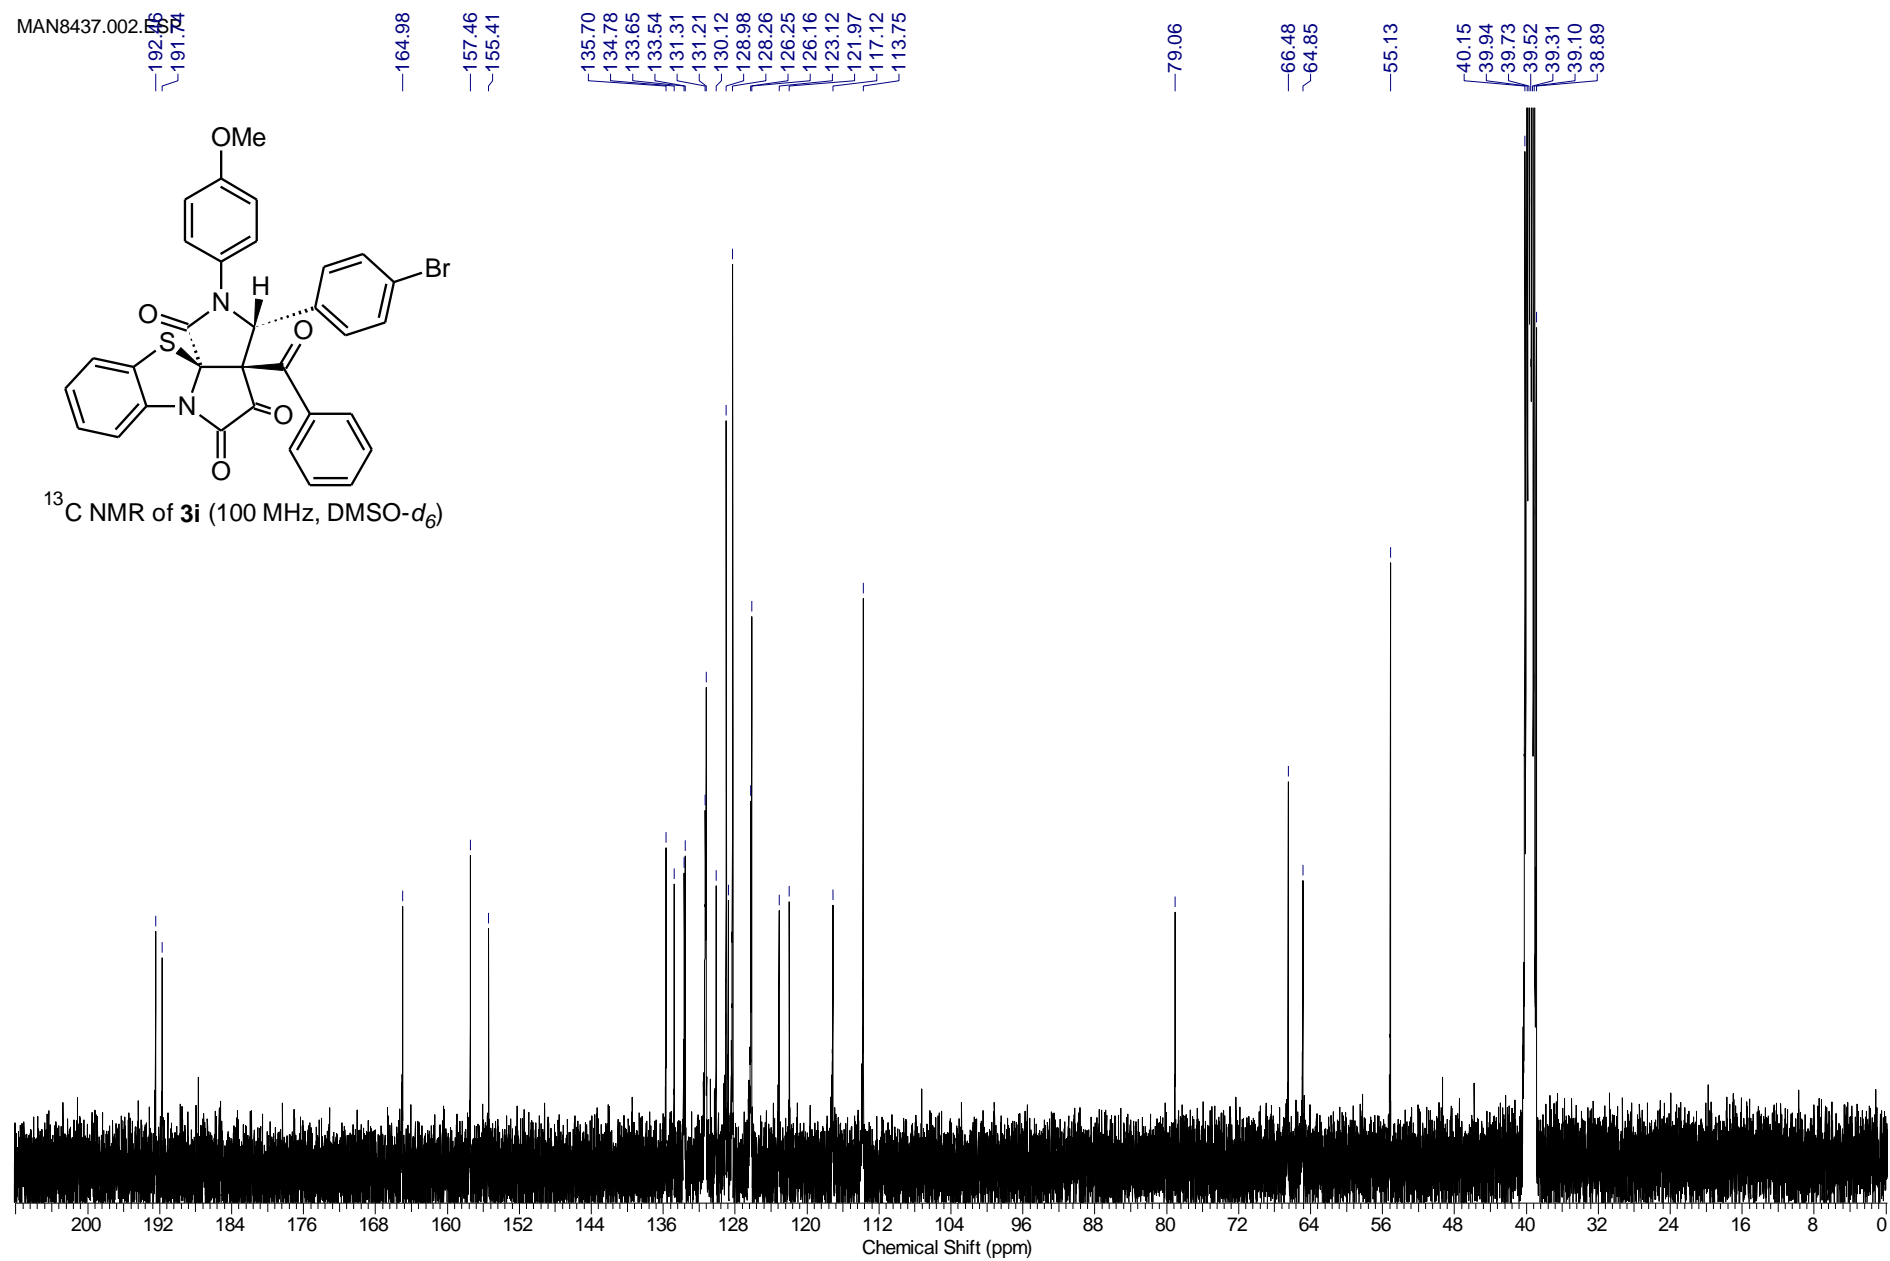

MAN8437.003.ESP

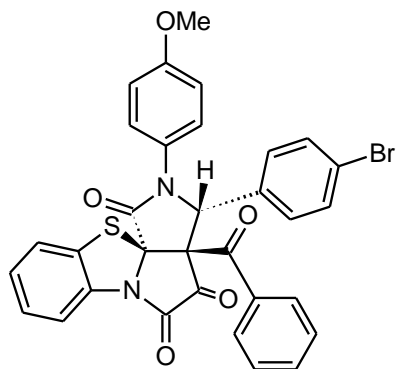DEPT135 of **3i** (100 MHz, DMSO-*d*<sub>6</sub>)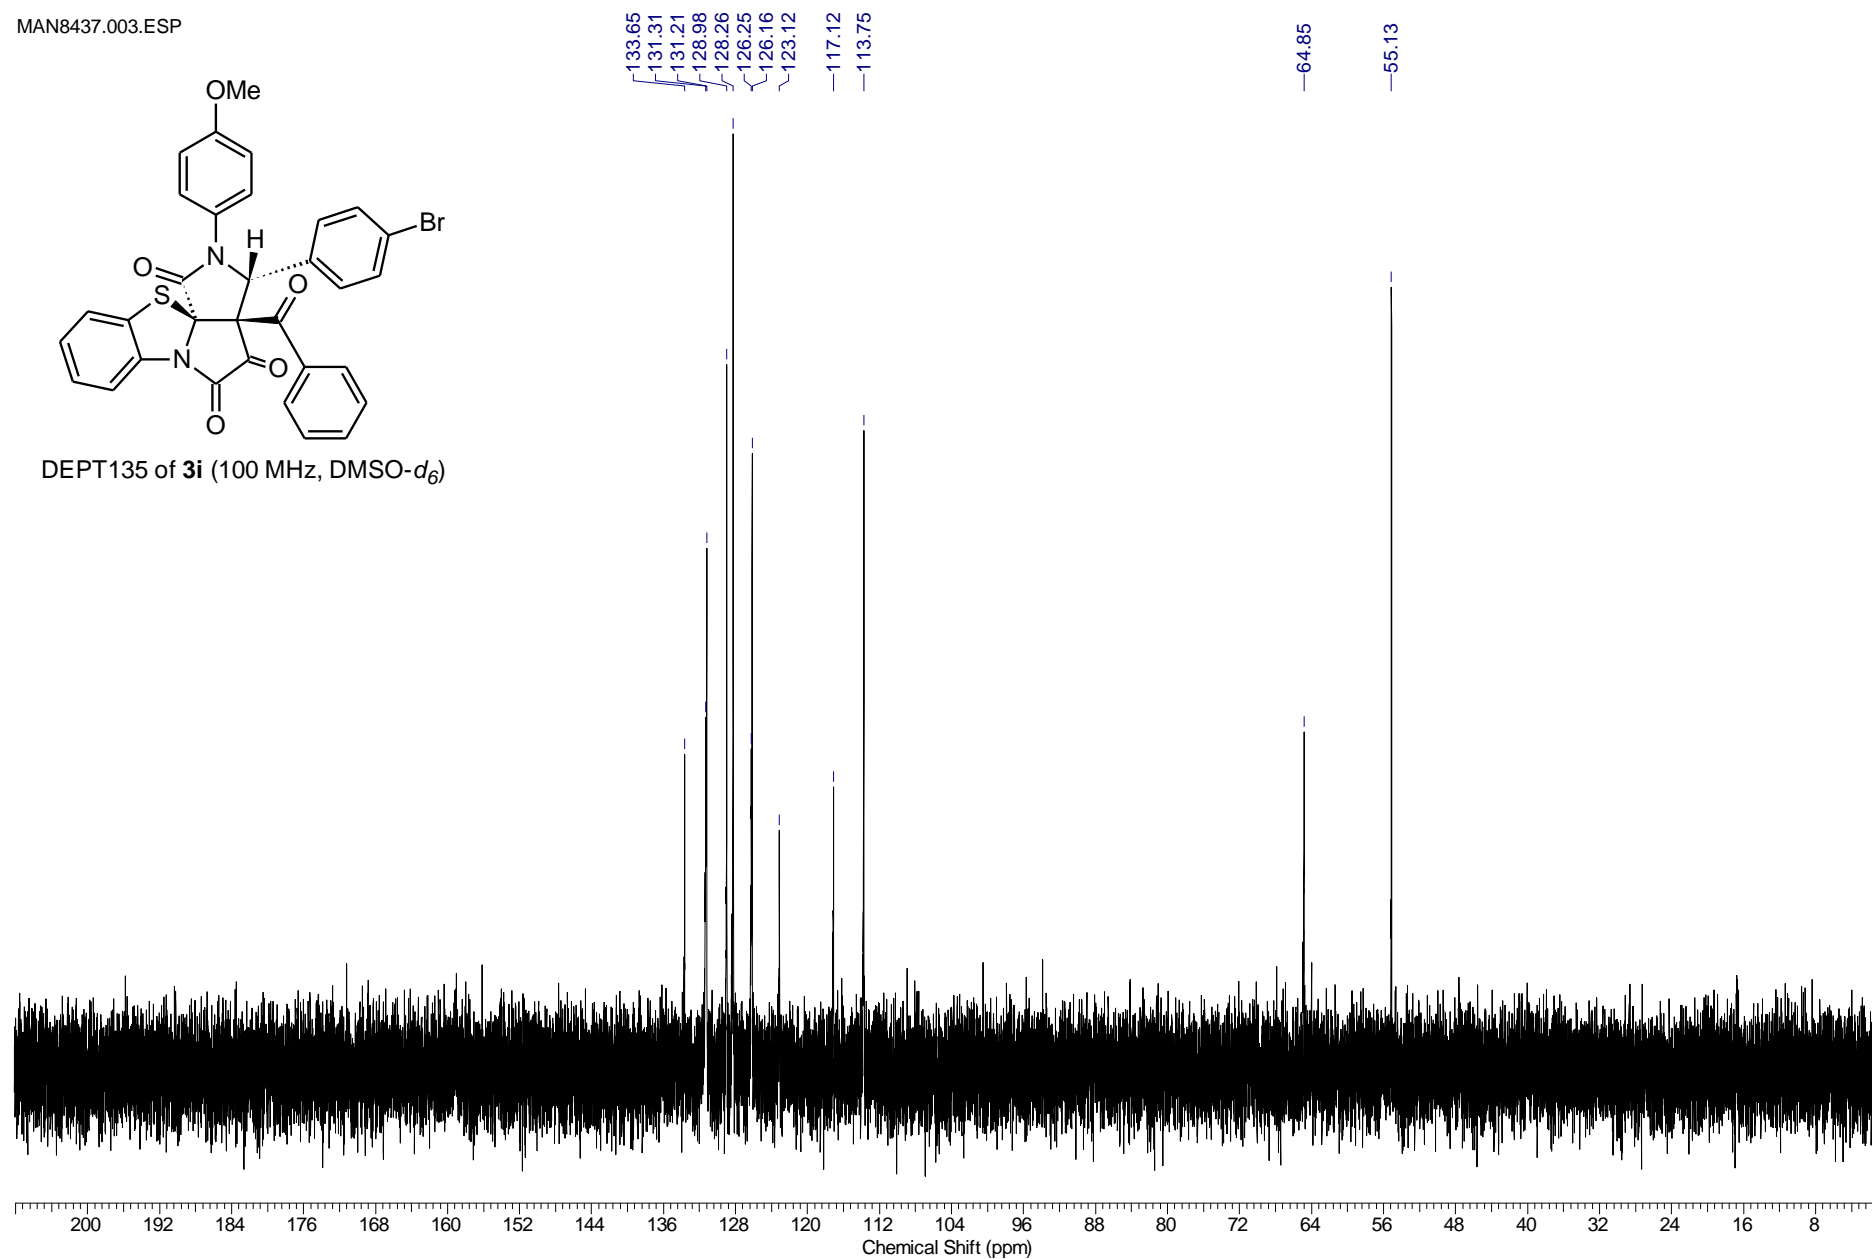

MAN8661.001.ESP

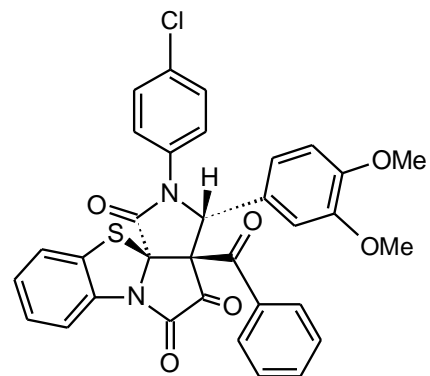

$^1\text{H}$  NMR of **3j** (400 MHz,  $\text{DMSO}-d_6$ )

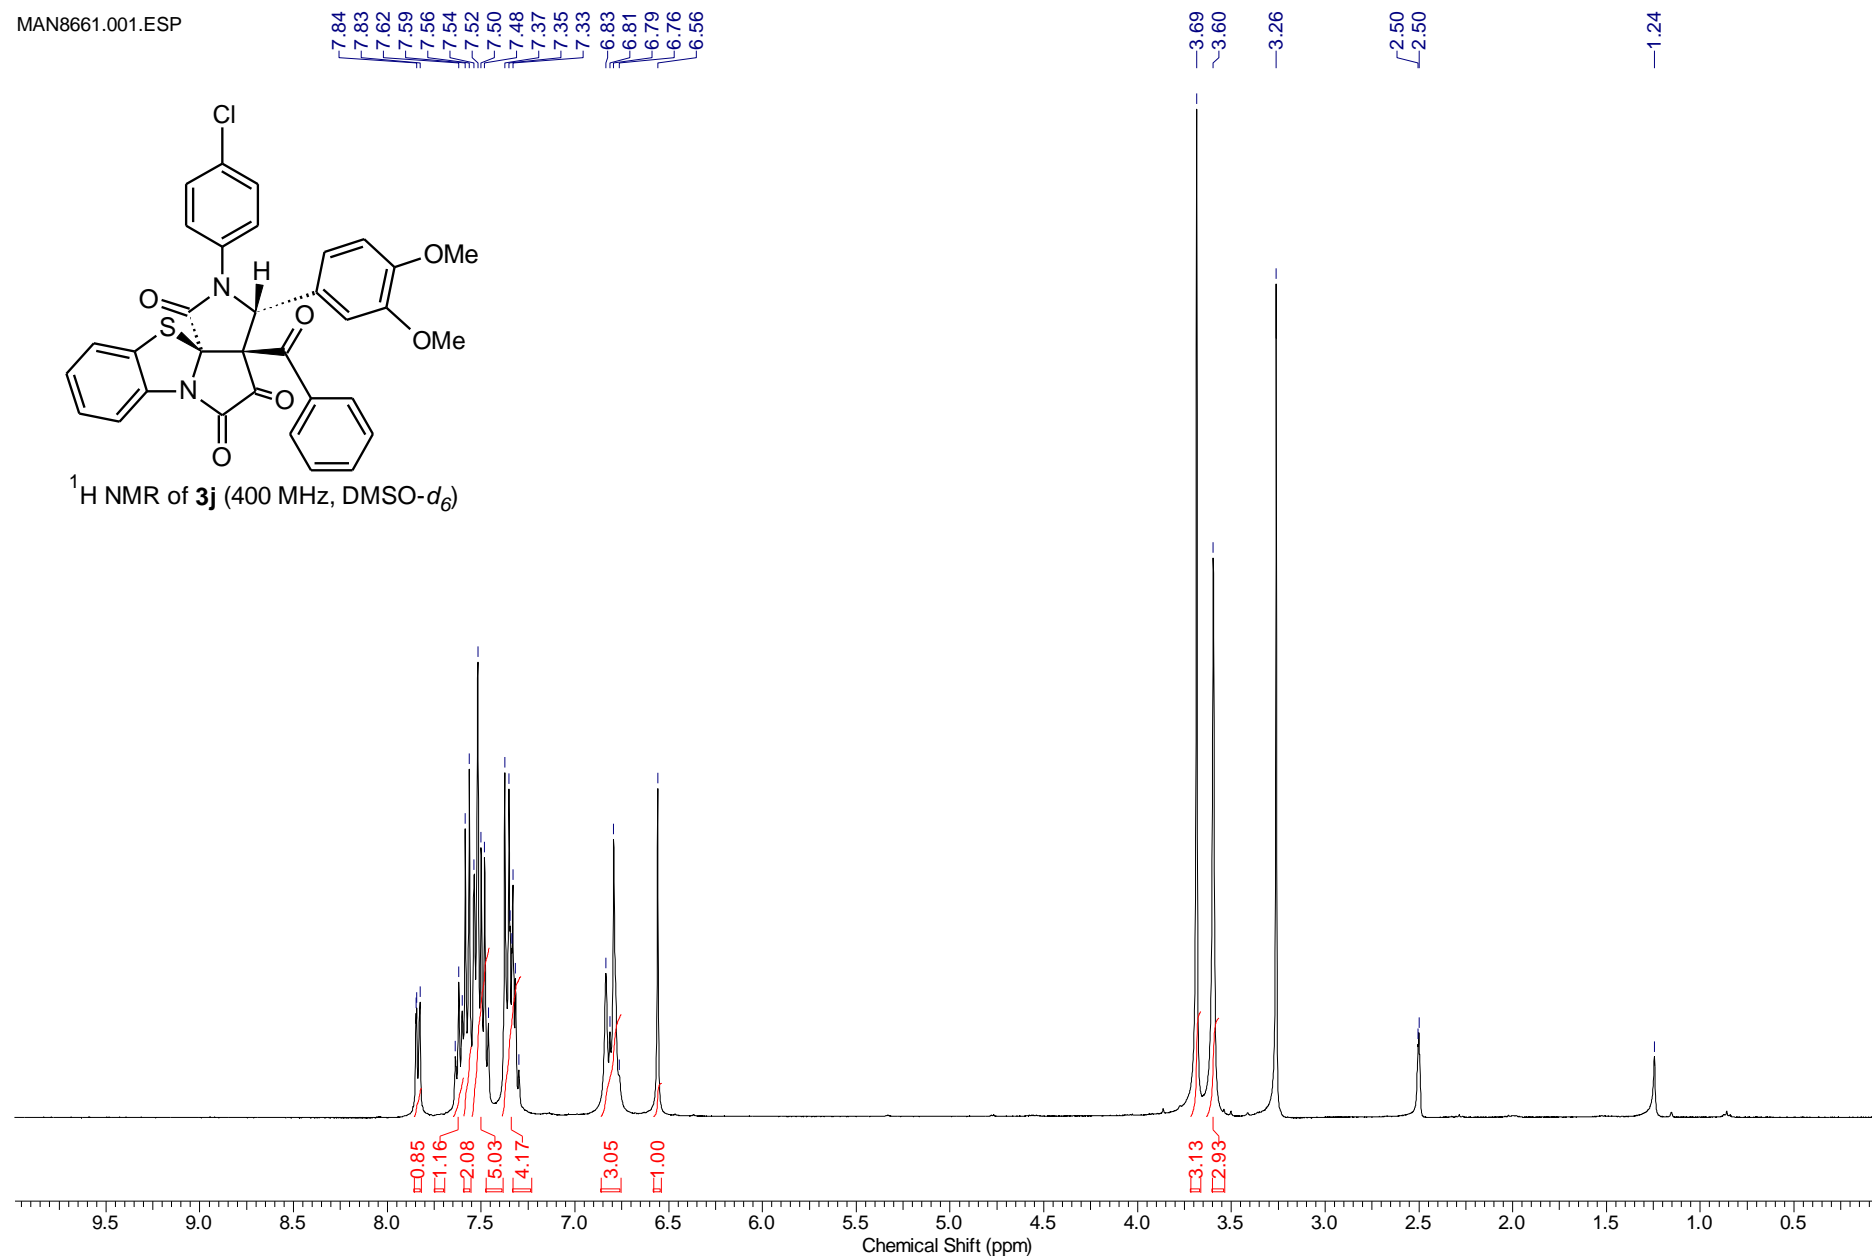

MAN8661.002.DS8

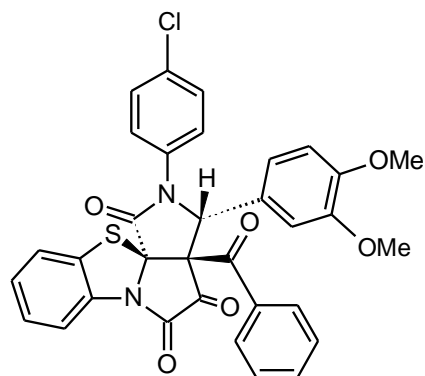

$^{13}\text{C}$  NMR of **3j** (100 MHz,  $\text{DMSO}-d_6$ )

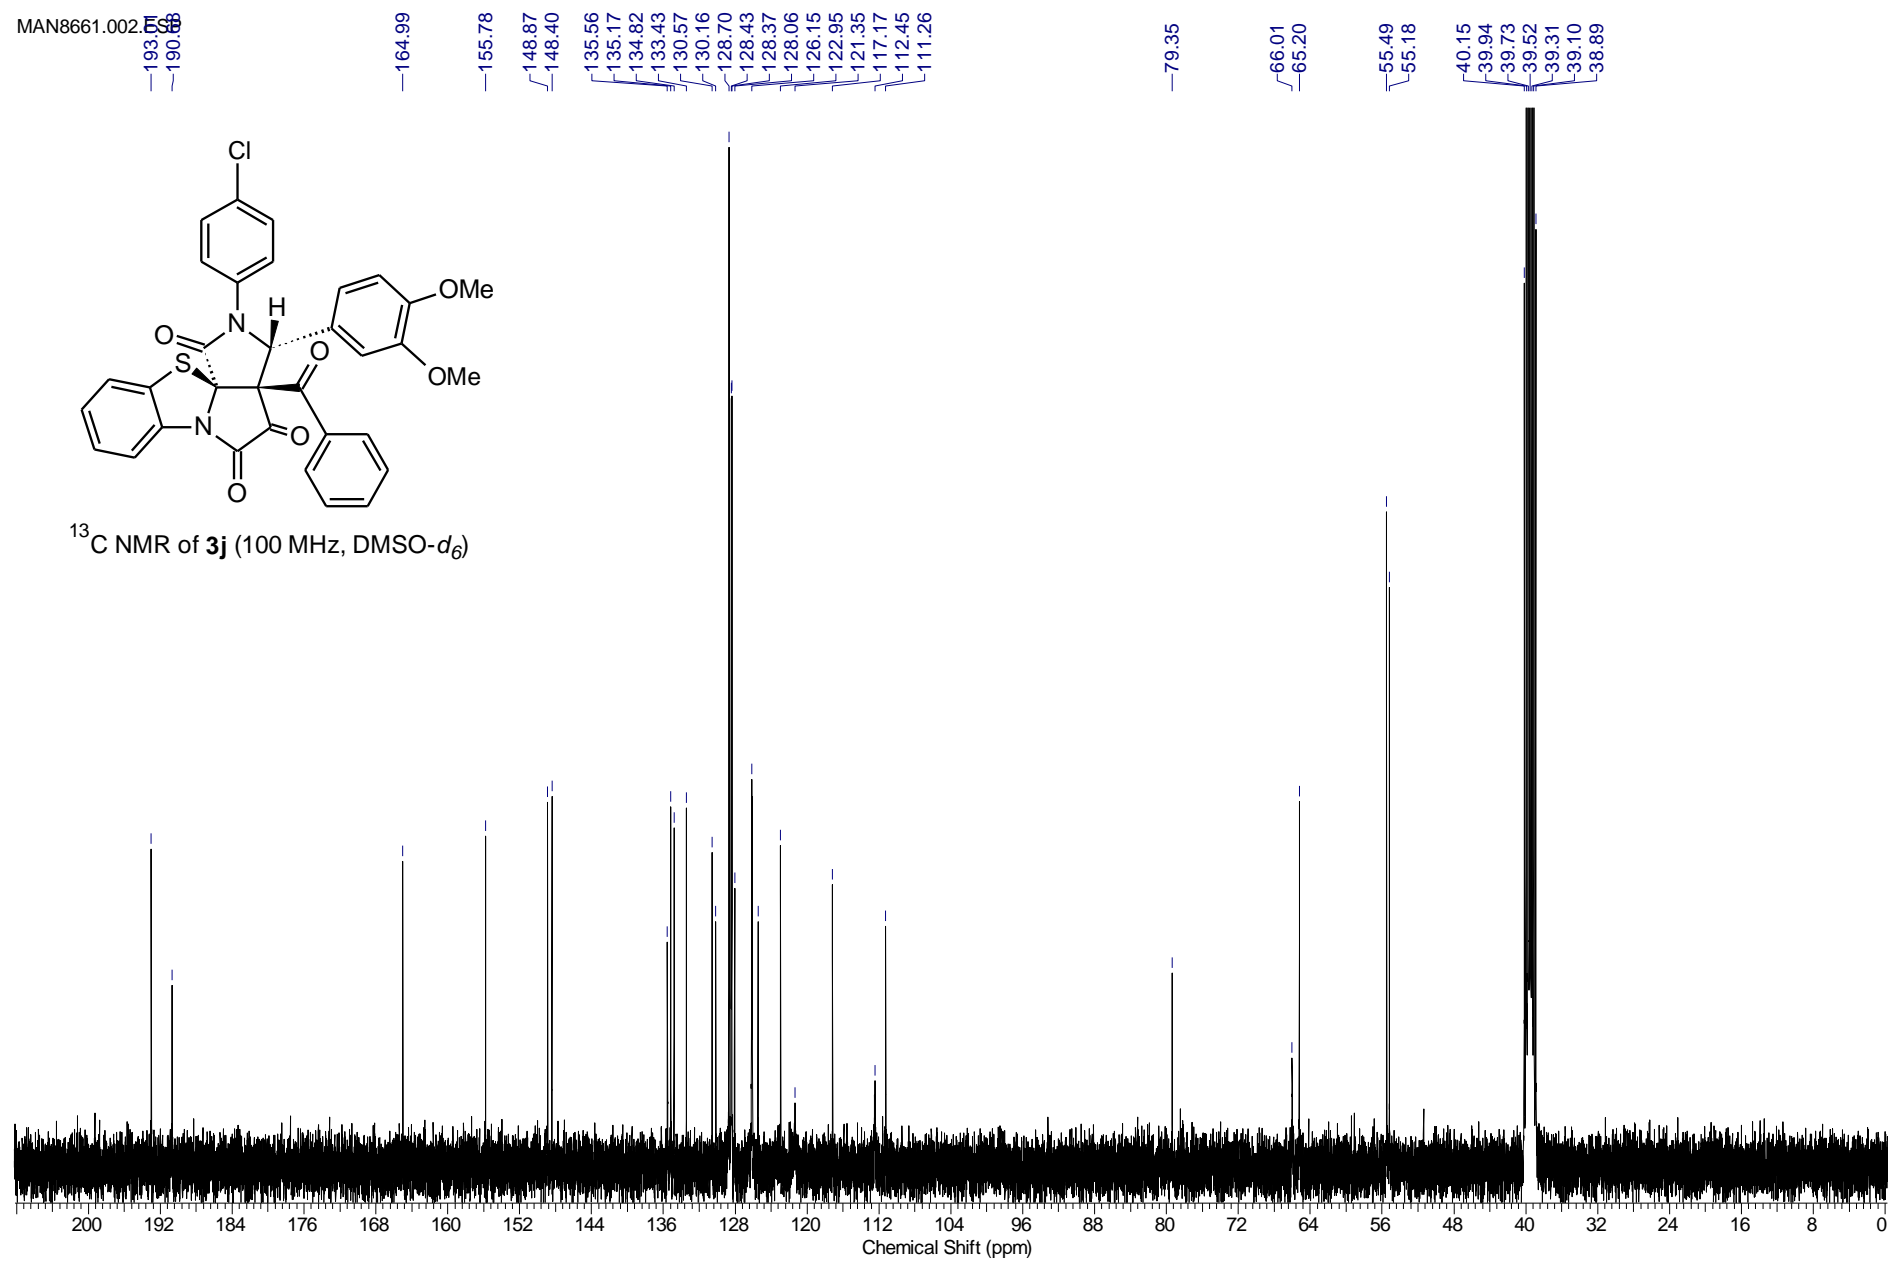



MAN8661.003.ESP

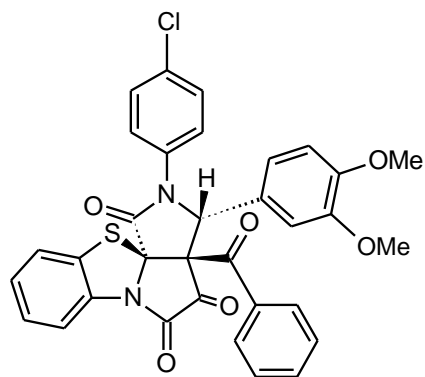

DEPT135 of **3j** (100 MHz, DMSO- $d_6$ )

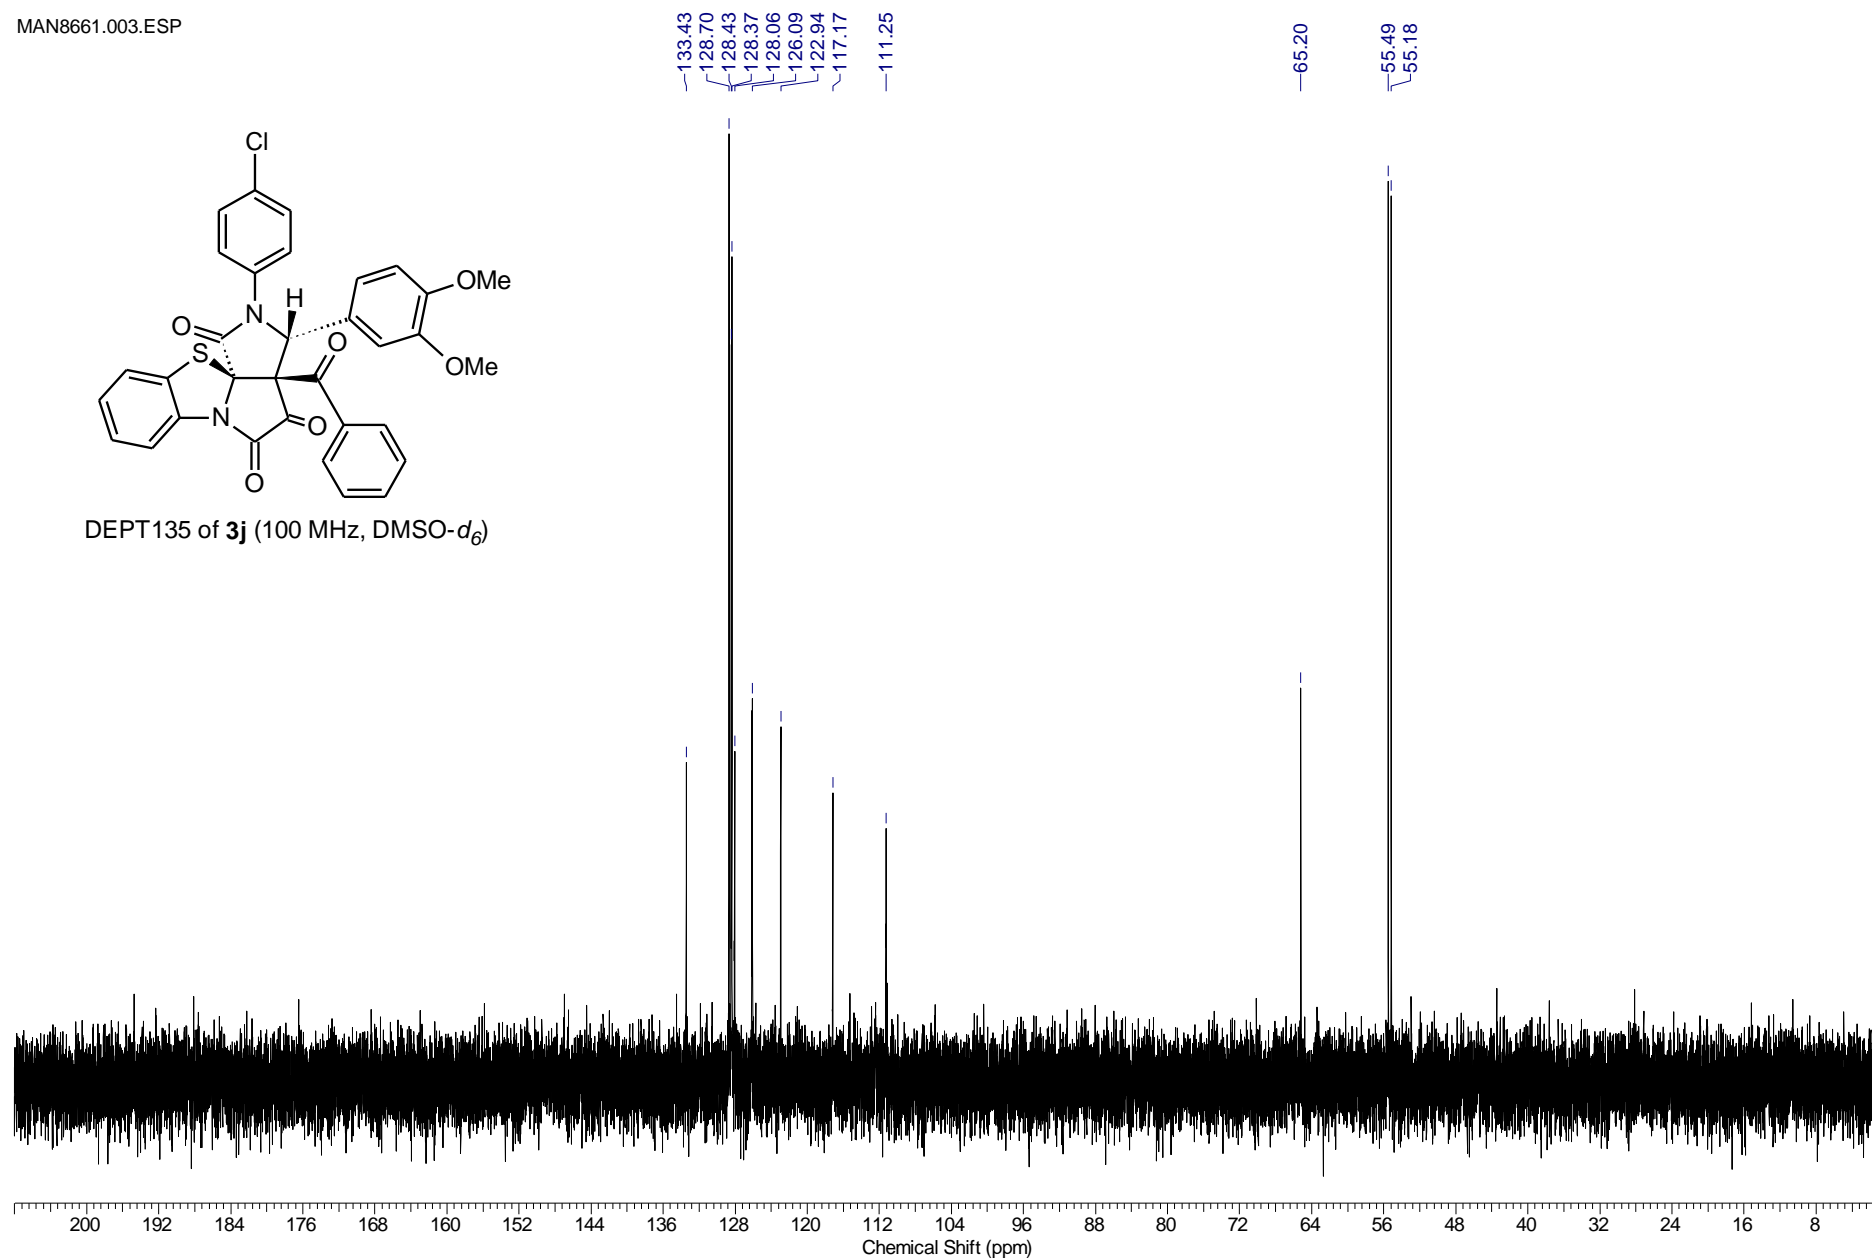

MAN8587.001.ESP

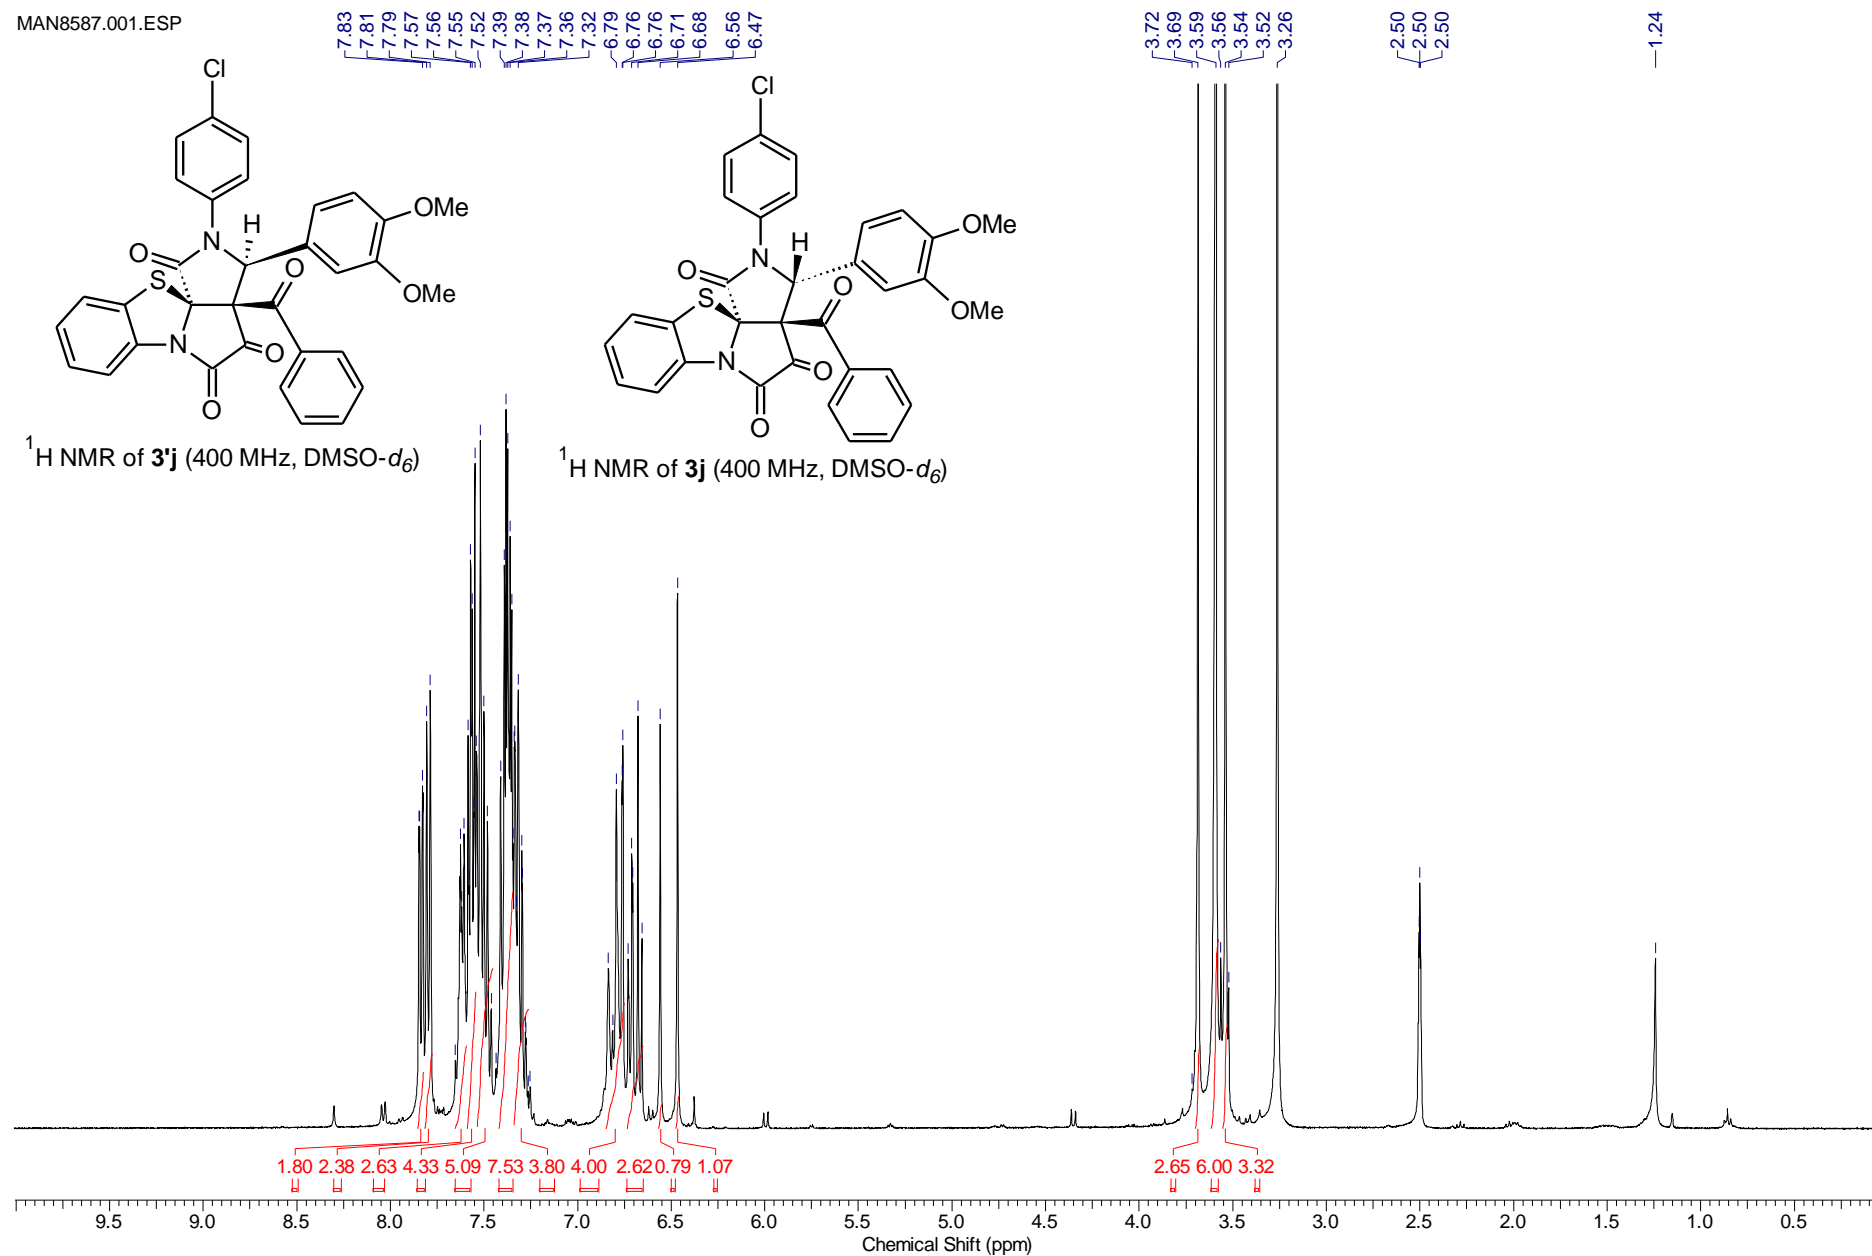

MAN8587.002

193.81  
191.04  
190.68  
188.11

165.68  
164.99

155.78  
154.41

148.87  
148.71

148.08  
135.72

134.87  
134.43

130.10  
128.99

128.70  
128.56

128.44  
128.37

127.74  
125.89

125.70  
122.43

117.17  
115.82

111.35  
111.26

79.35  
79.20

70.63  
66.03

65.20  
64.21

55.49  
55.27

55.18  
40.15

39.94  
39.73

39.52  
39.31

39.10  
38.89

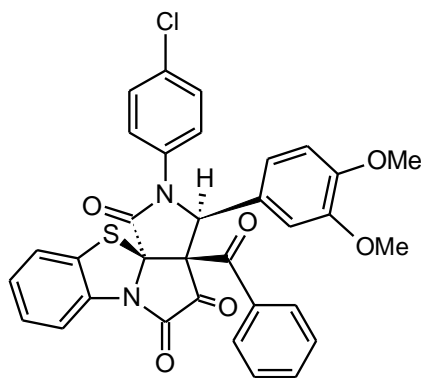

$^{13}\text{C}$  NMR of 3'j (100 MHz, DMSO- $d_6$ )

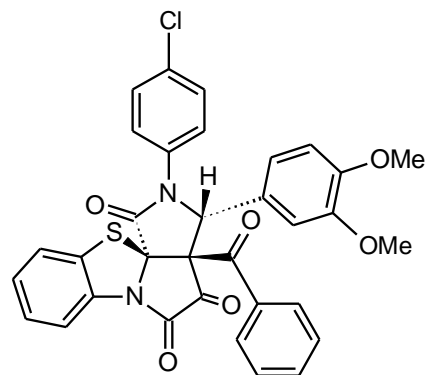

$^{13}\text{C}$  NMR of 3j (100 MHz, DMSO- $d_6$ )

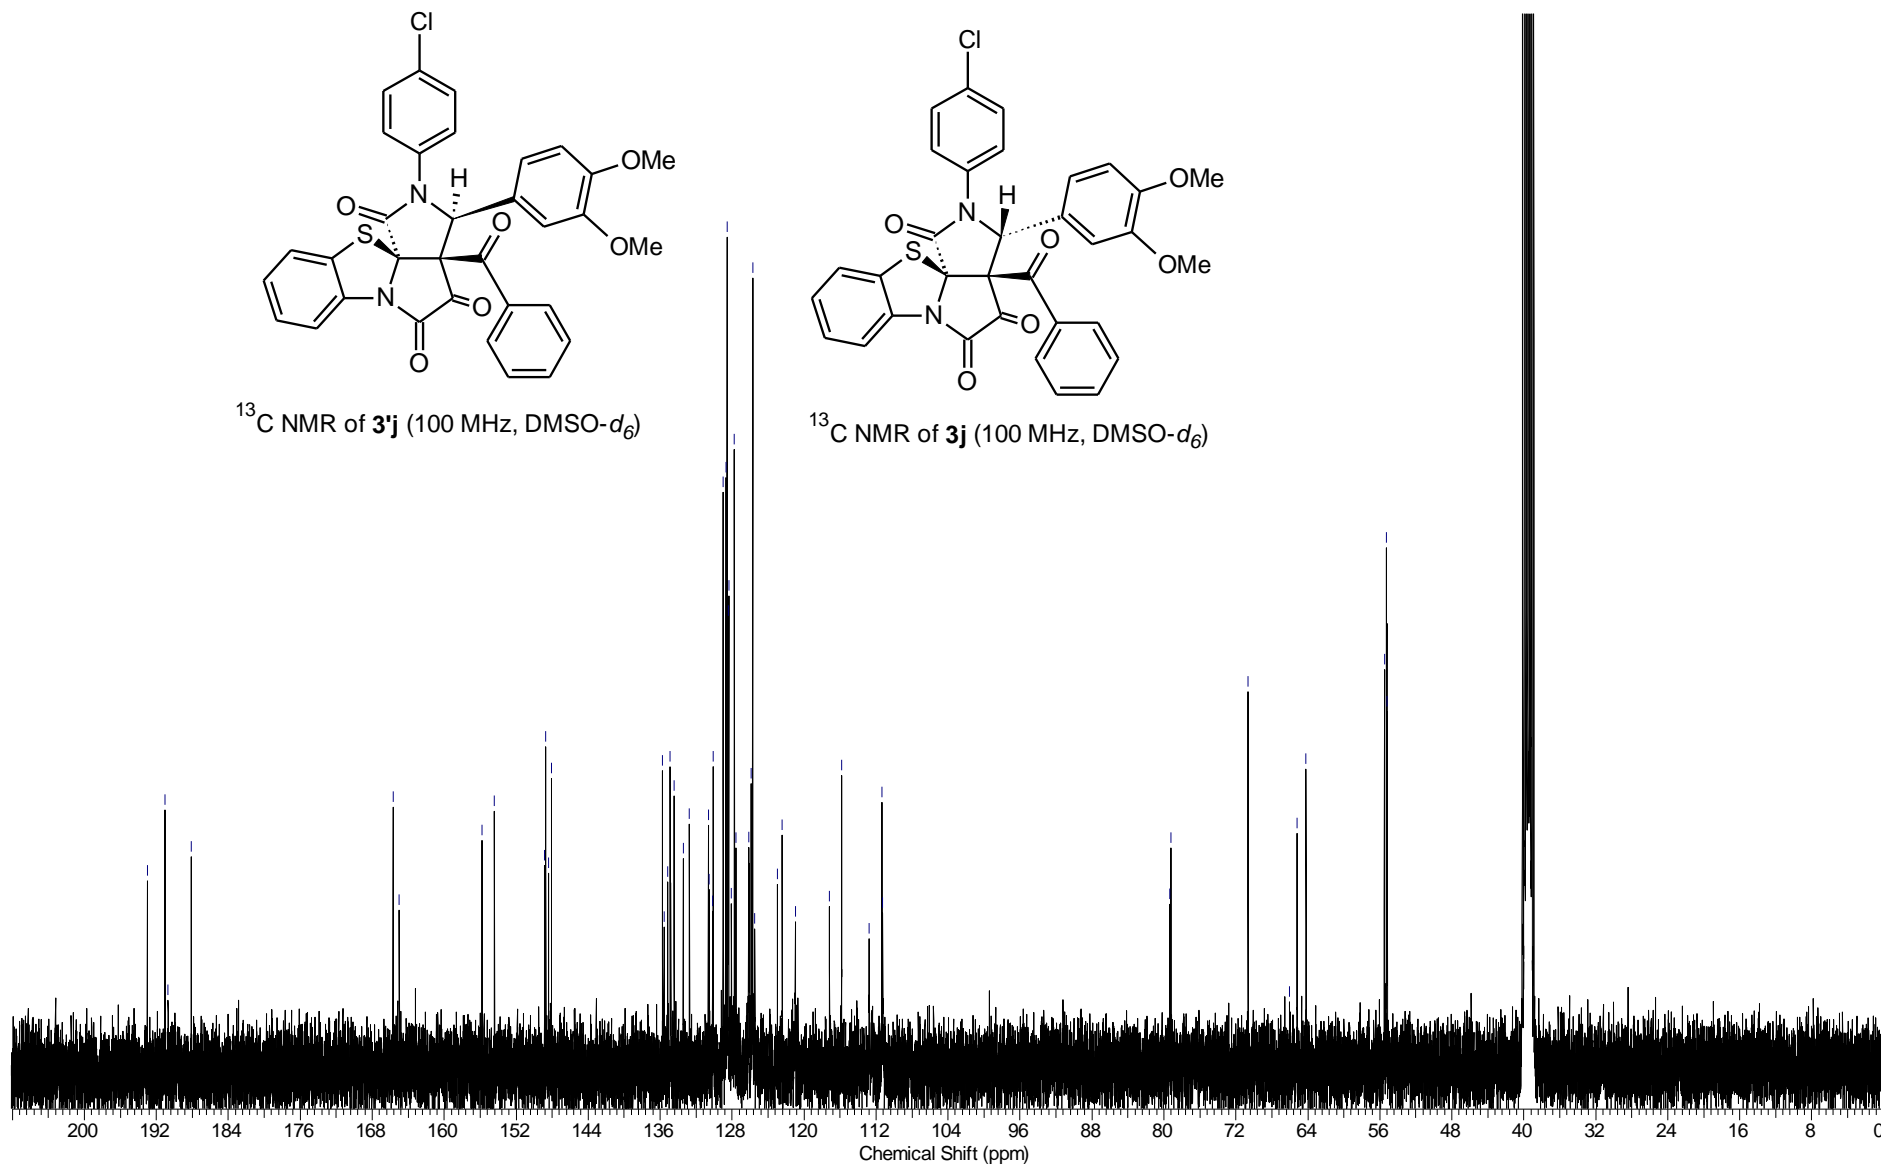

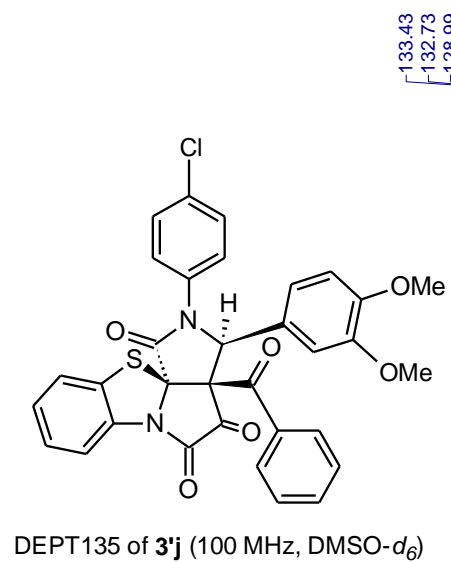

133.43  
132.73  
128.99  
128.69  
128.56  
128.37  
128.06  
127.73  
127.56  
126.09  
125.70  
122.42  
117.17  
115.82  
112.76  
111.35  
111.25

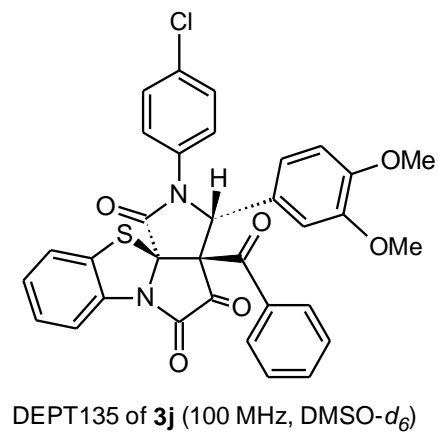

65.20  
64.20  
55.49  
55.27  
55.18

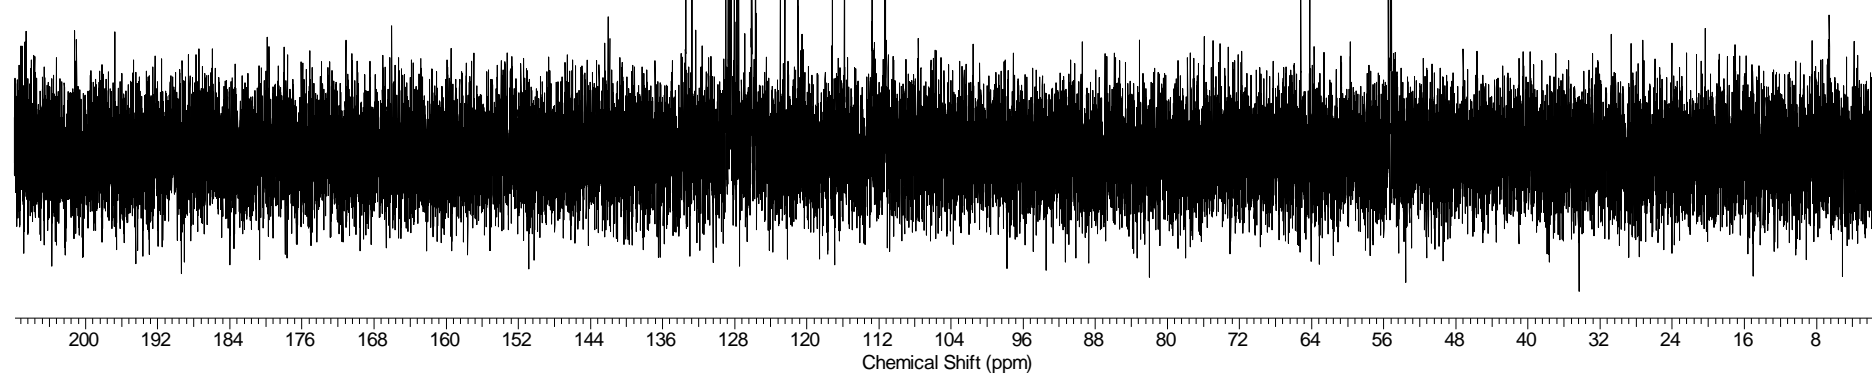

MAN8405.001.ESP

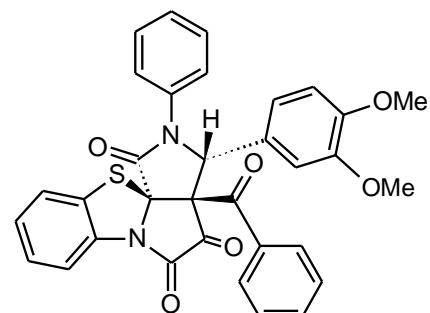

$^1\text{H}$  NMR of **3k** (400 MHz,  $\text{DMSO}-d_6$ )

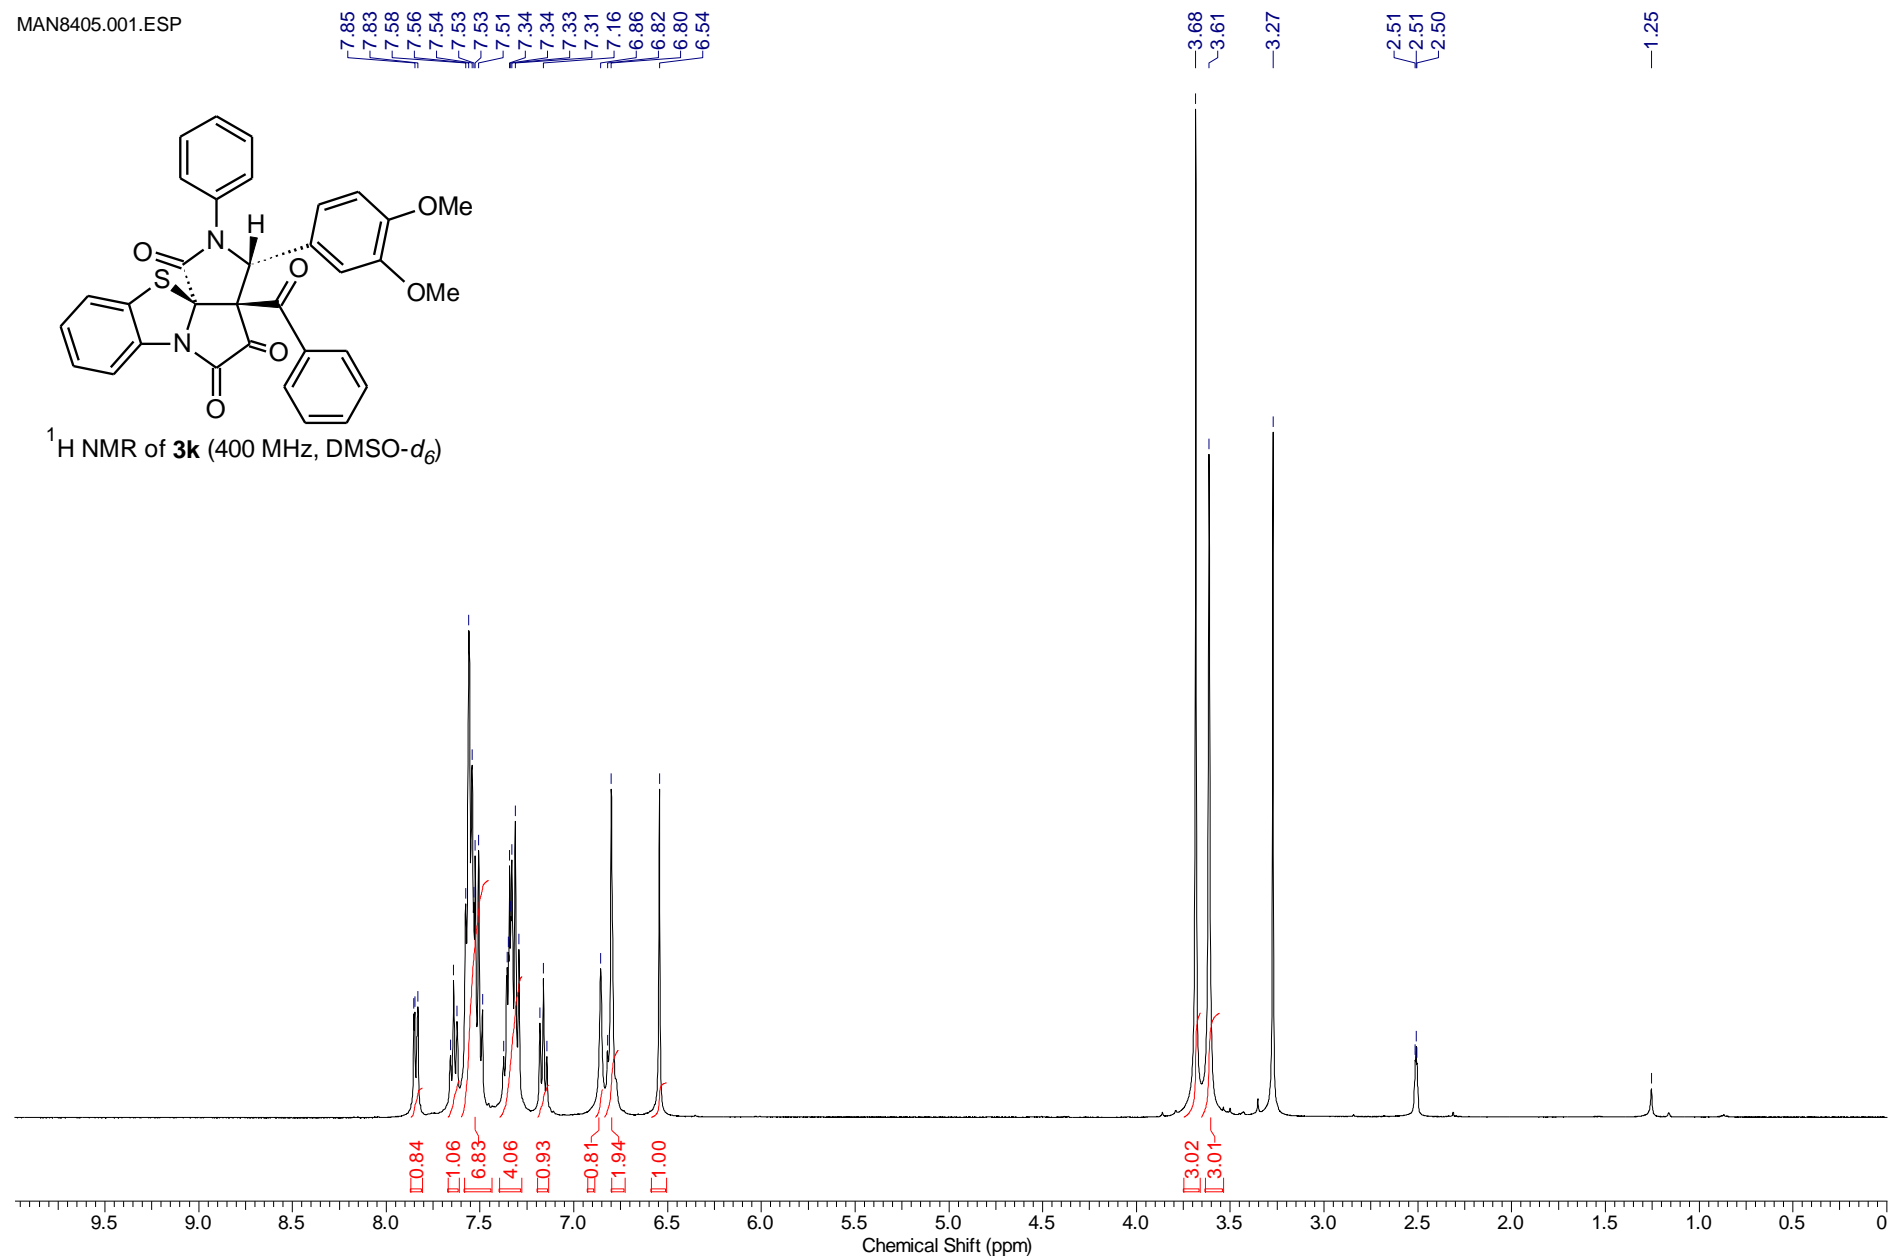

MAN8405.002.S38

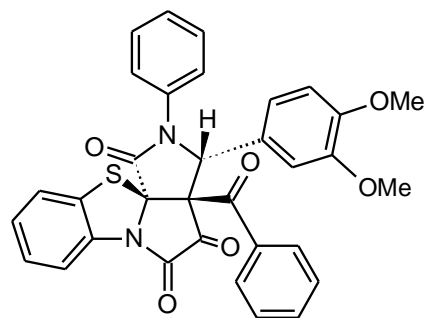

$^{13}\text{C}$  NMR of **3k** (100 MHz,  $\text{DMSO}-d_6$ )

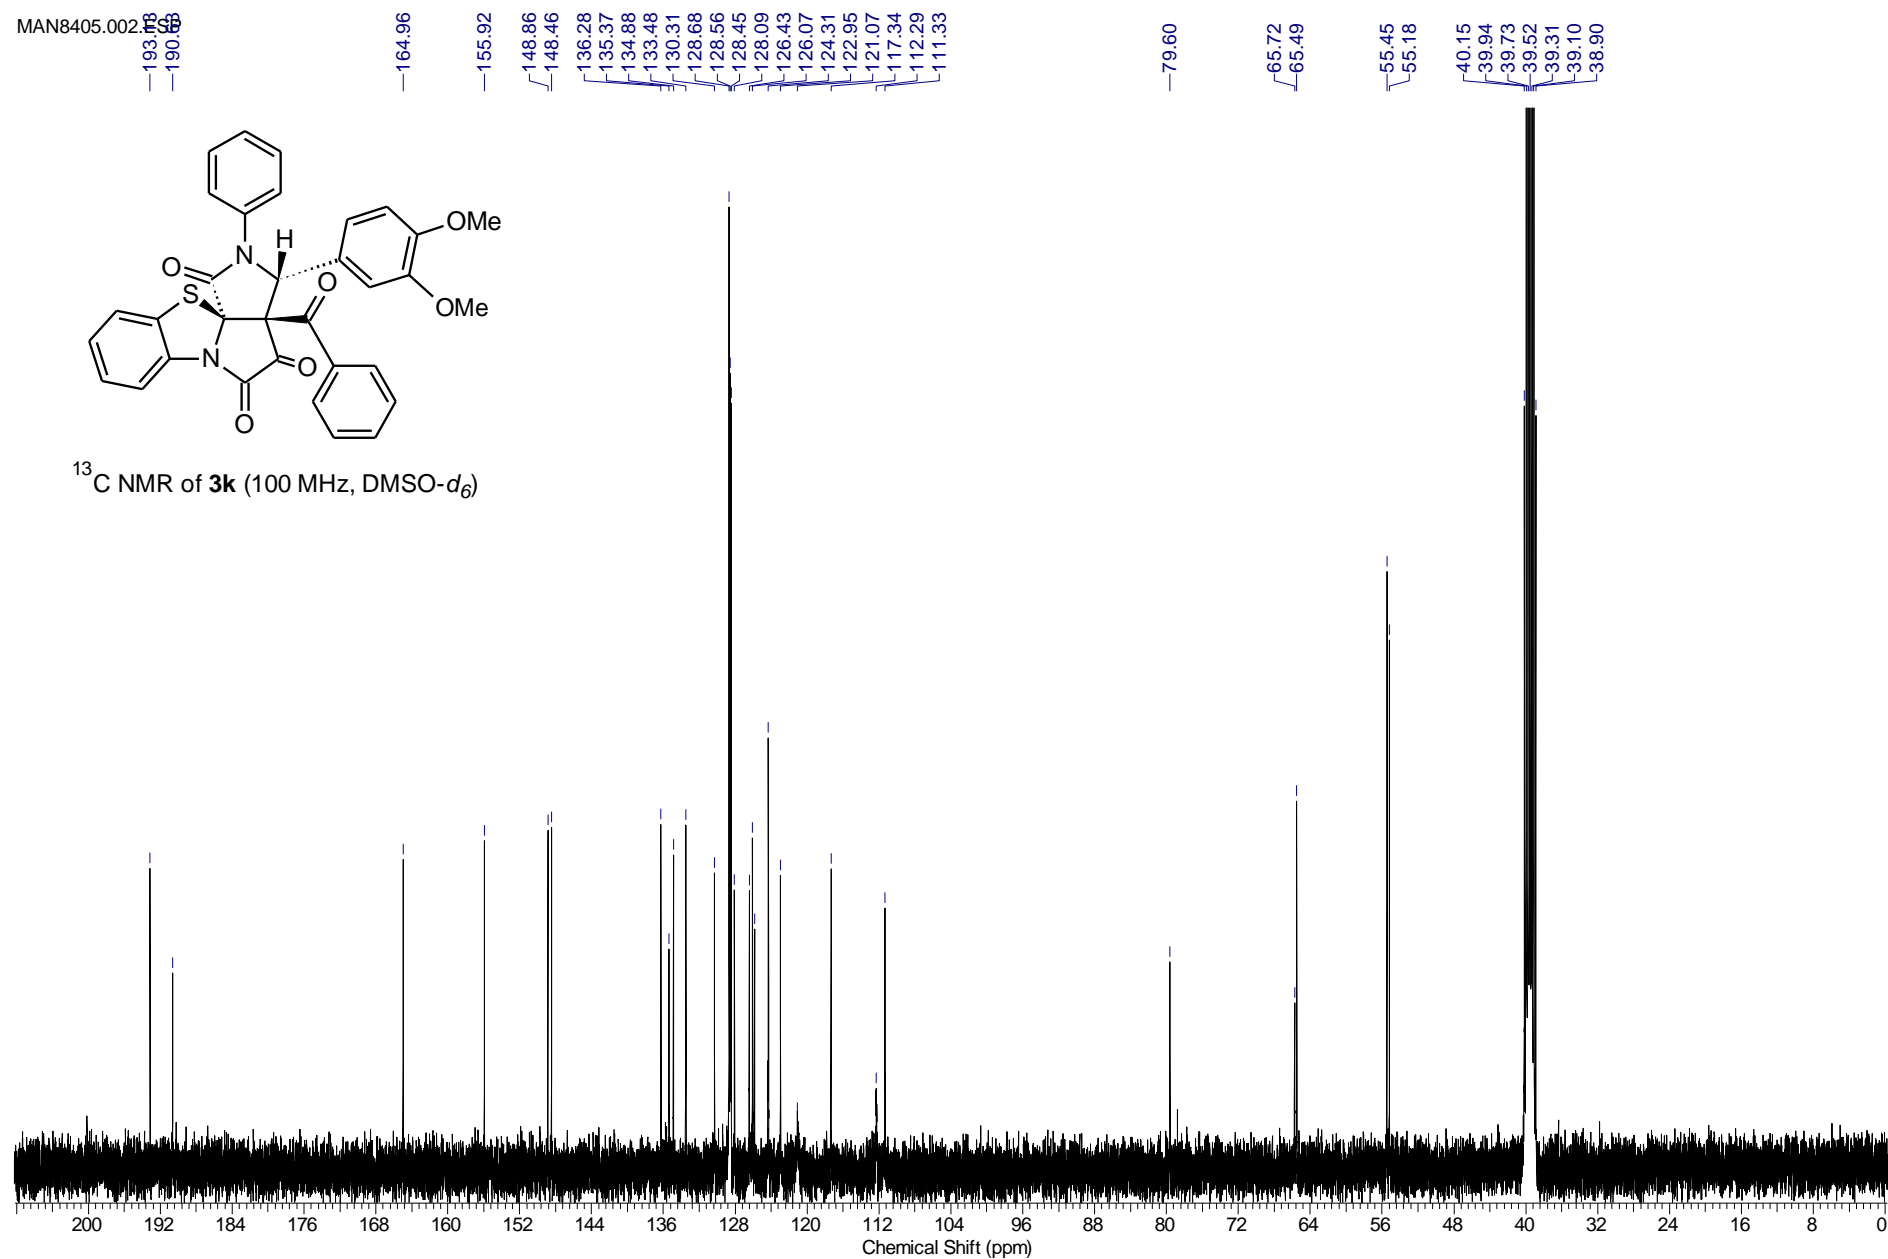

MAN8405.003.ESP

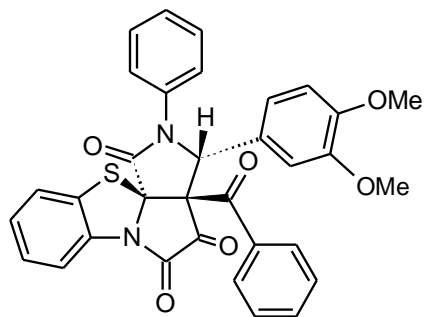

DEPT135 of **3k** (100 MHz, DMSO- $d_6$ )

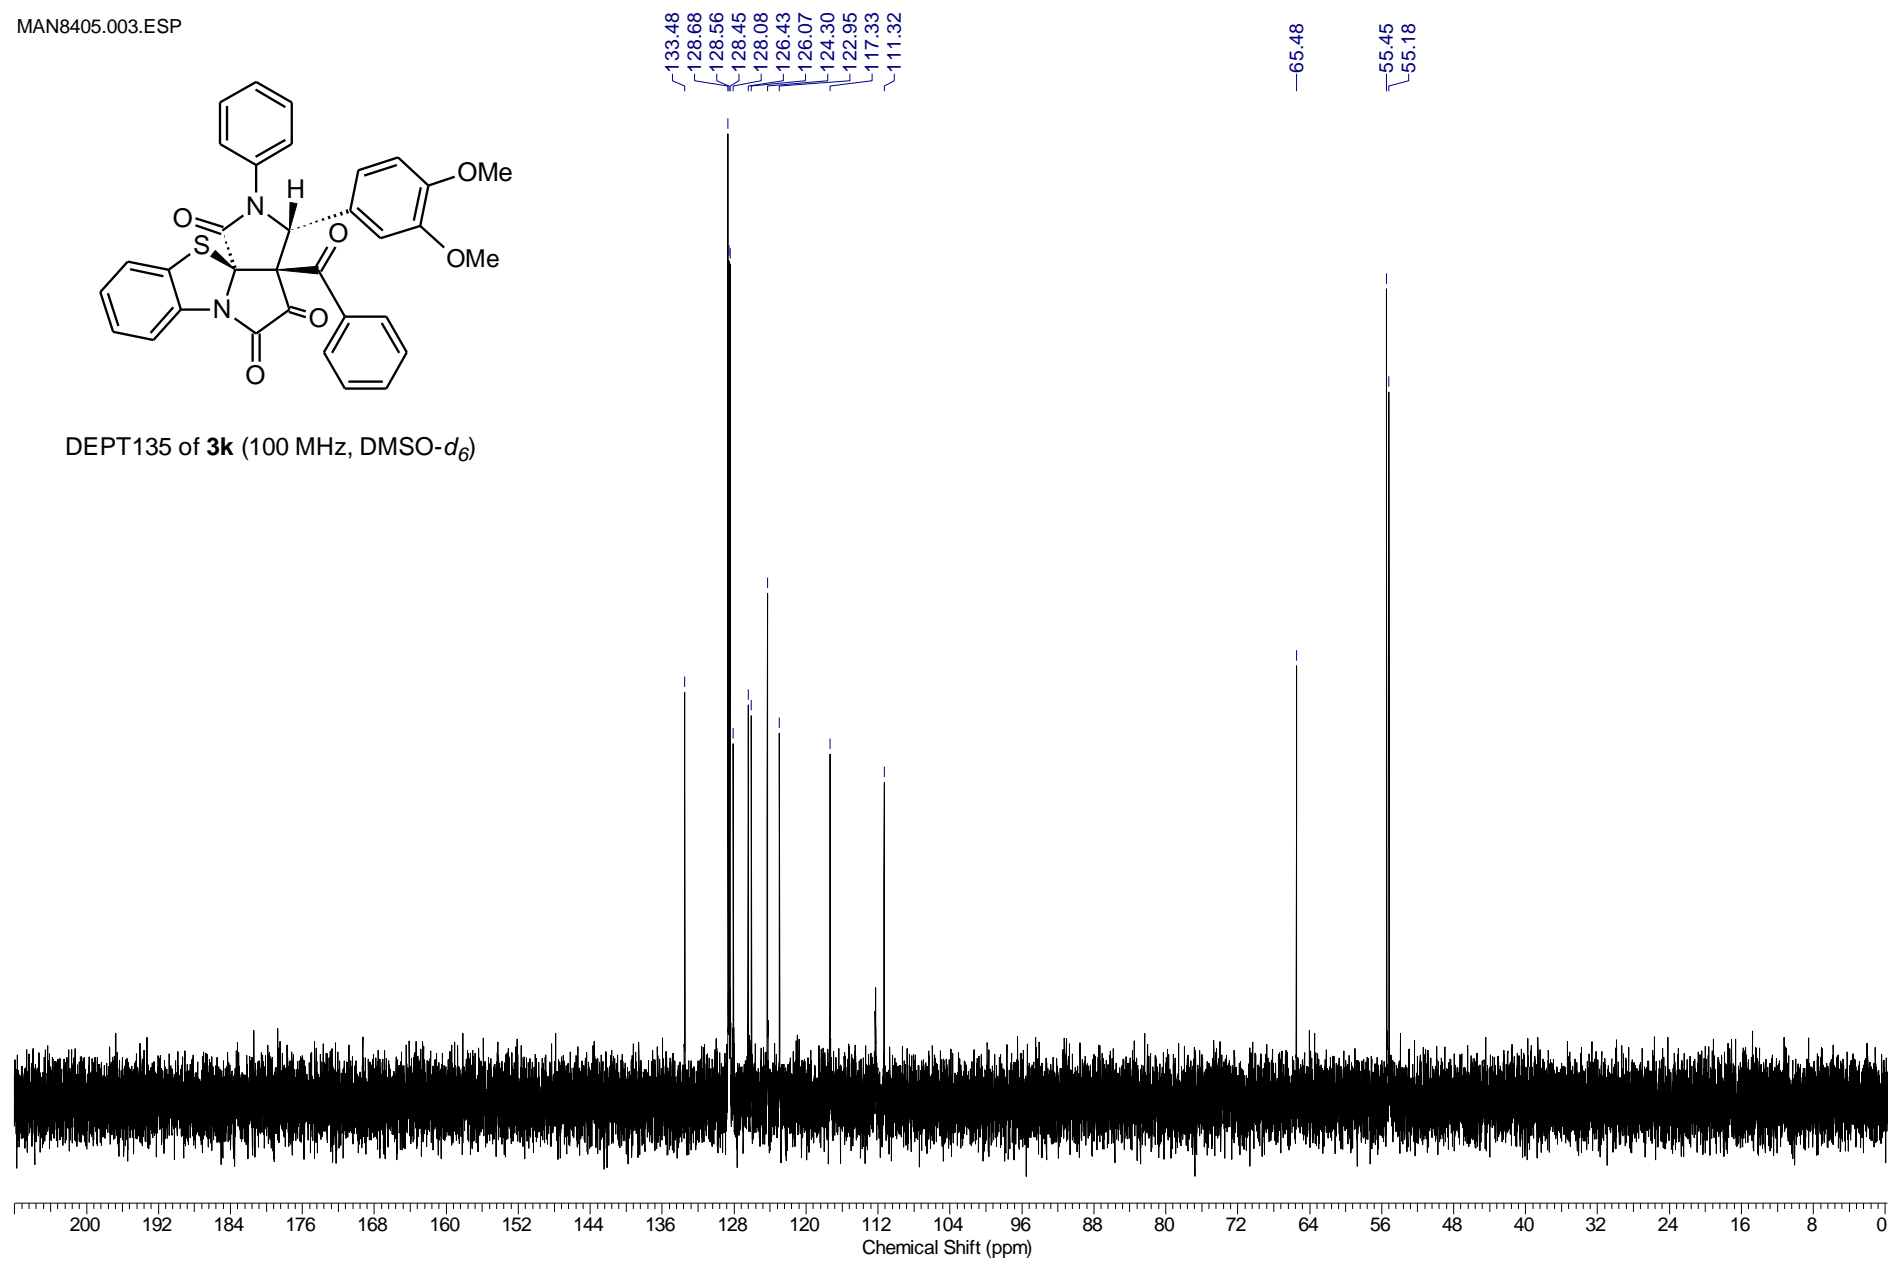

MAN8404.001.esp

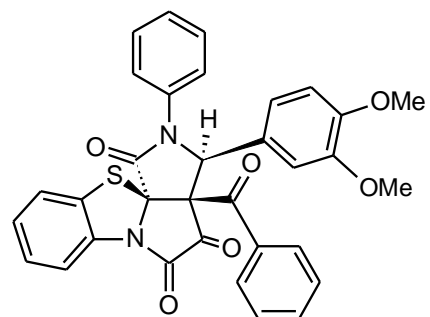

$^1\text{H}$  NMR of **3'k** (400 MHz, DMSO- $d_6$ )

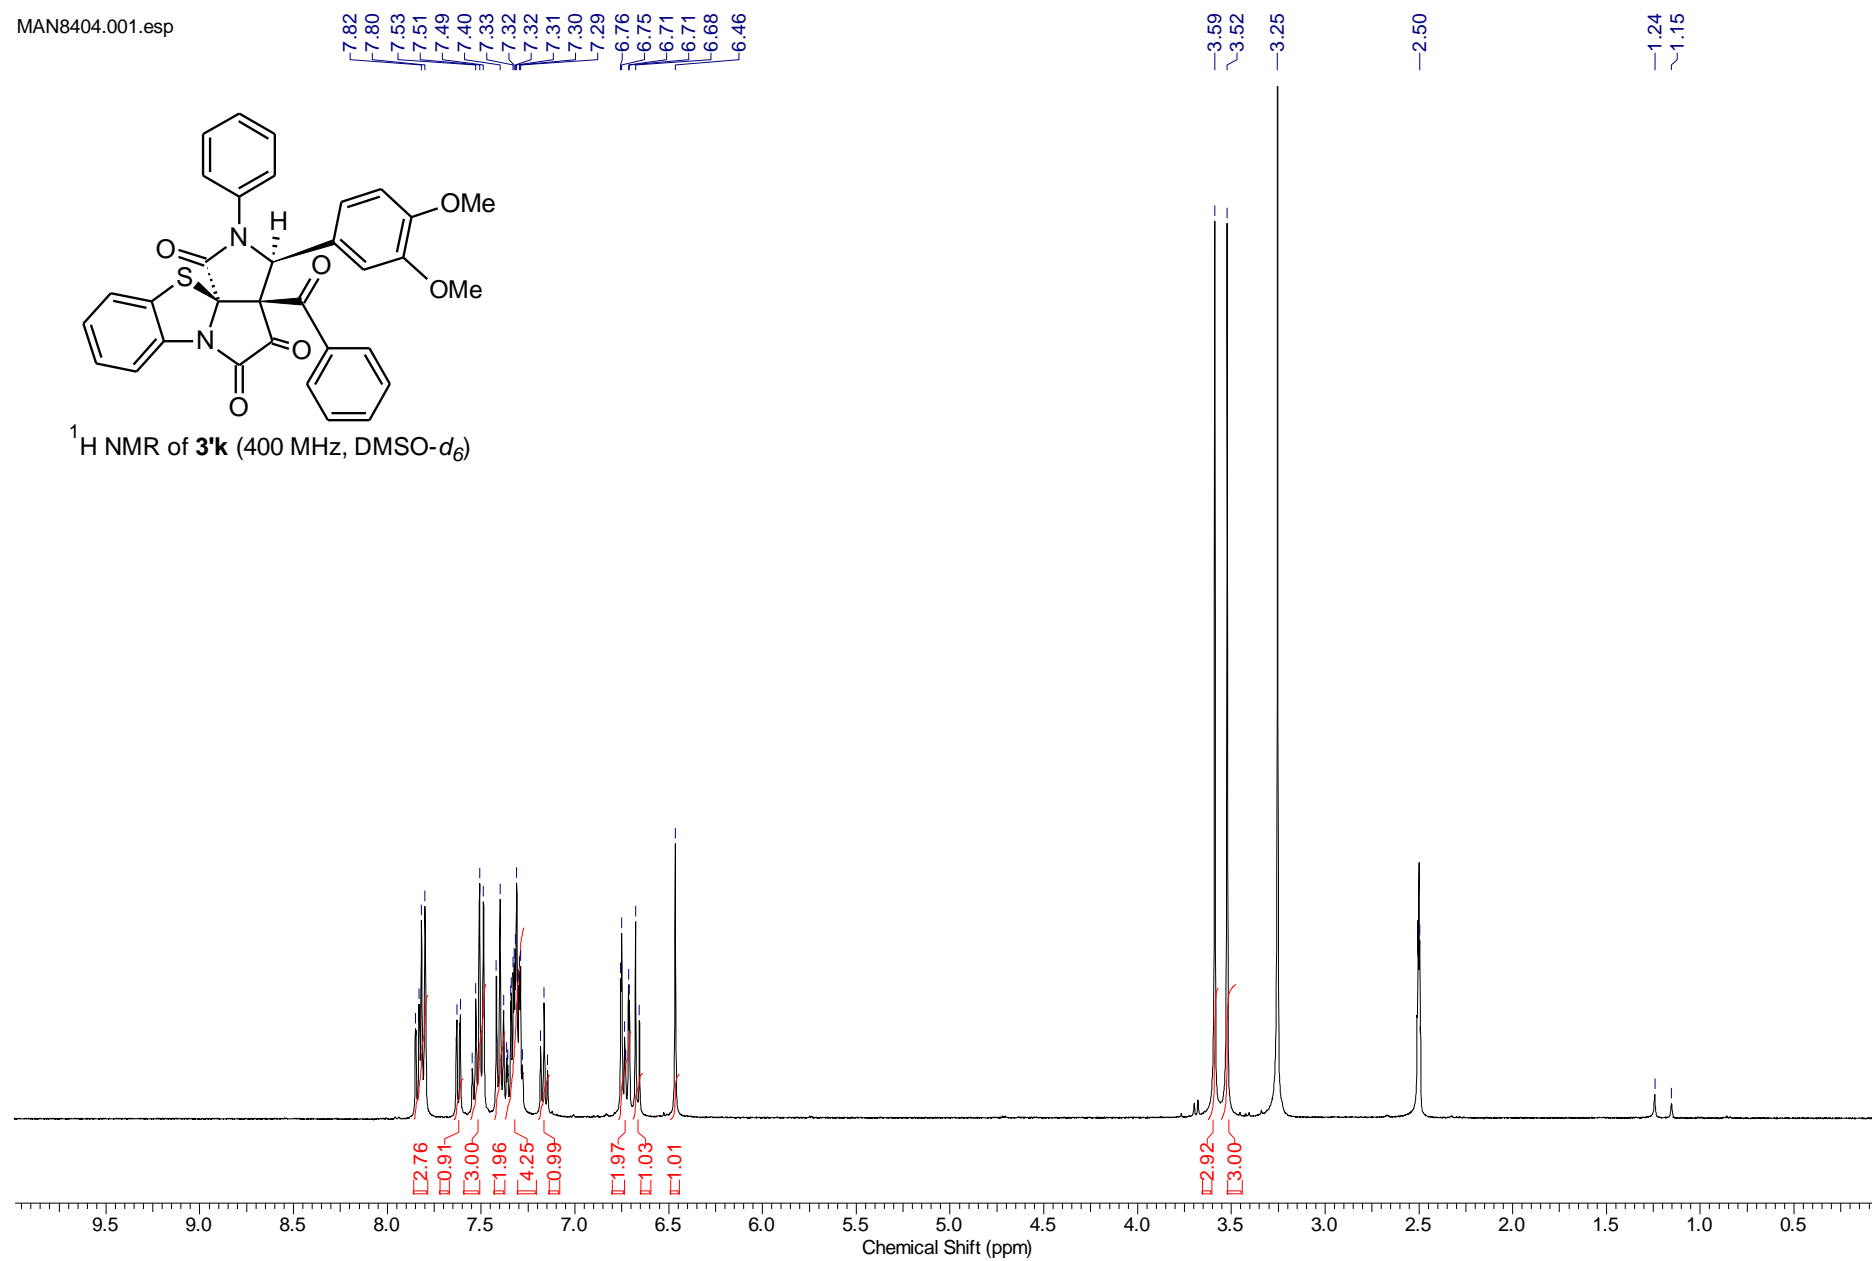



MAN8404.002.es

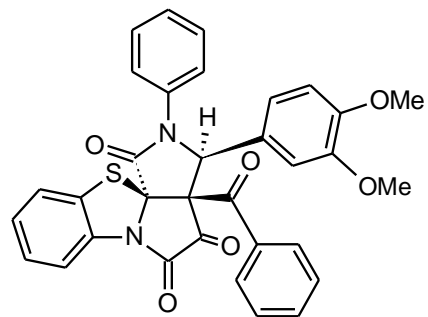

$^{13}\text{C}$  NMR of **3'k** (100 MHz, DMSO- $d_6$ )

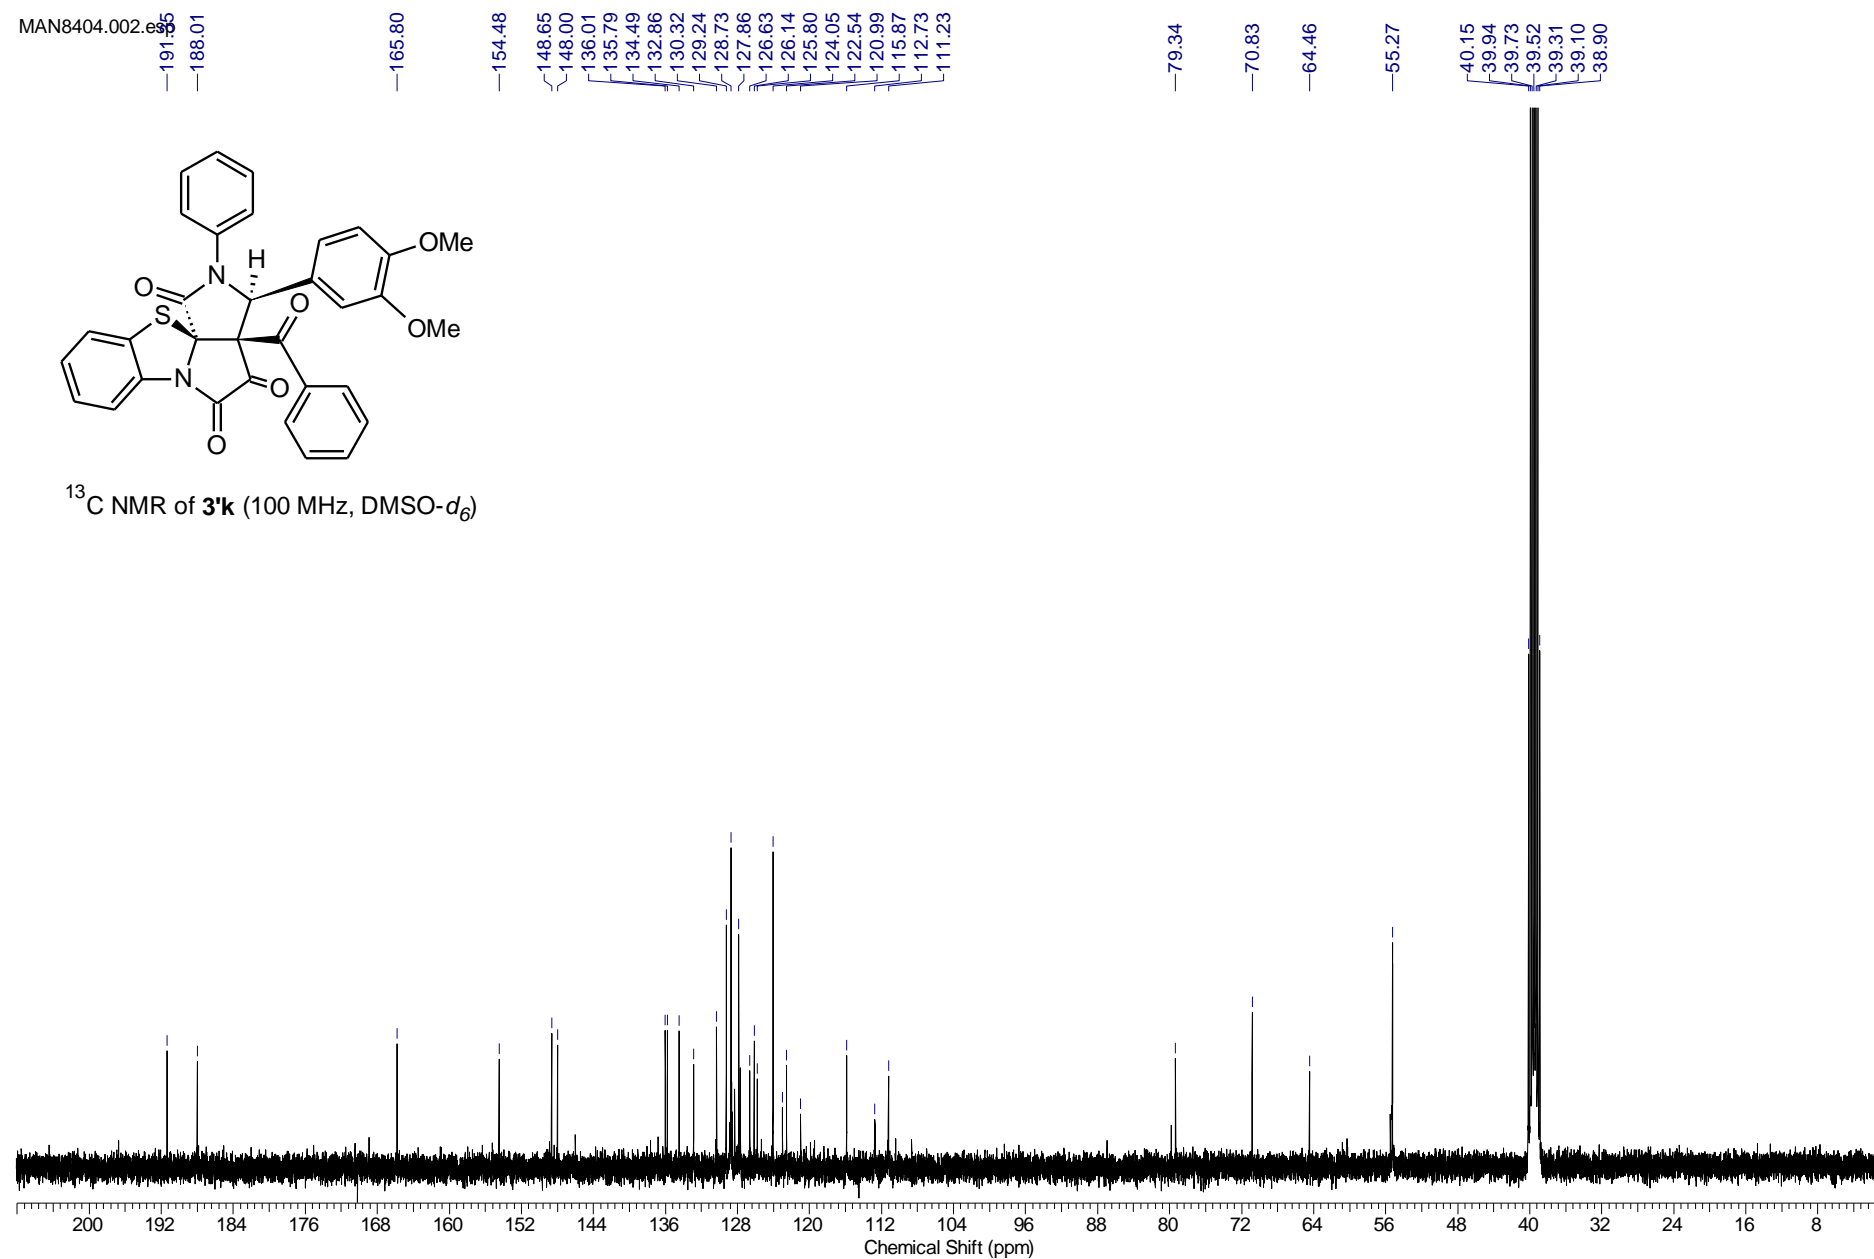

MAN8404.003.esp

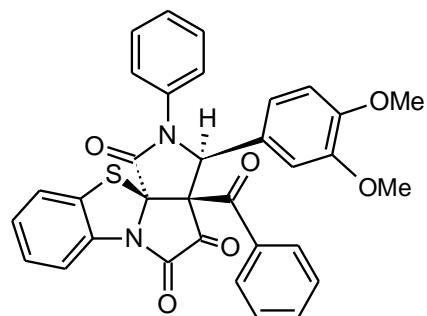

DEPT135 of **3k** (100 MHz, DMSO- $d_6$ )

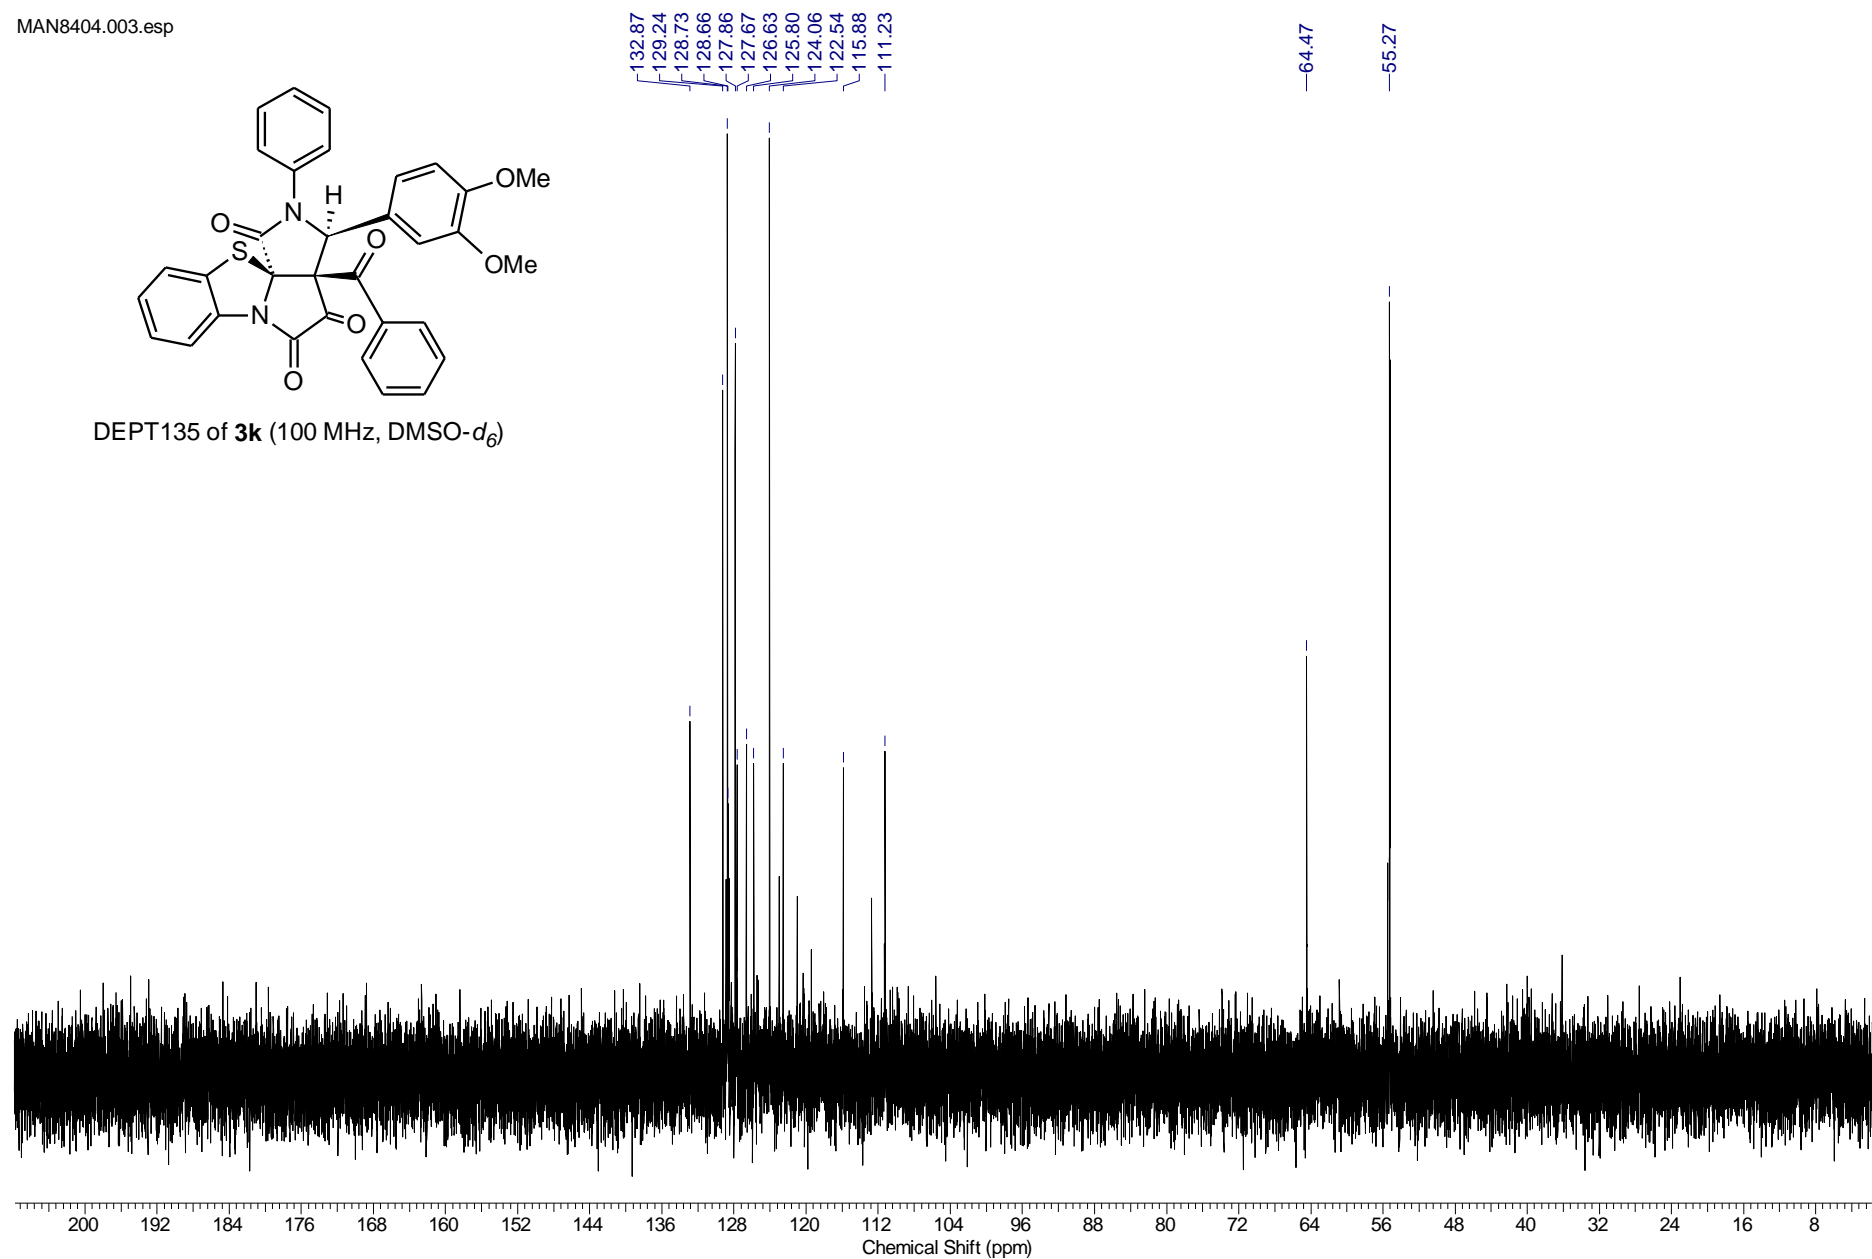

MAN8596.005.ESP

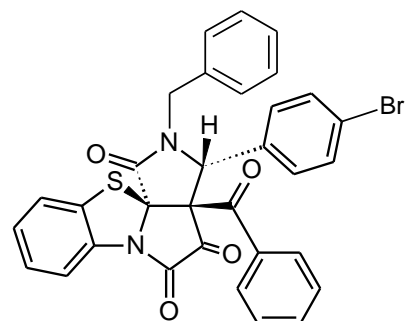

$^1\text{H}$  NMR of **3l** (400 MHz,  $\text{DMSO}-d_6$ )

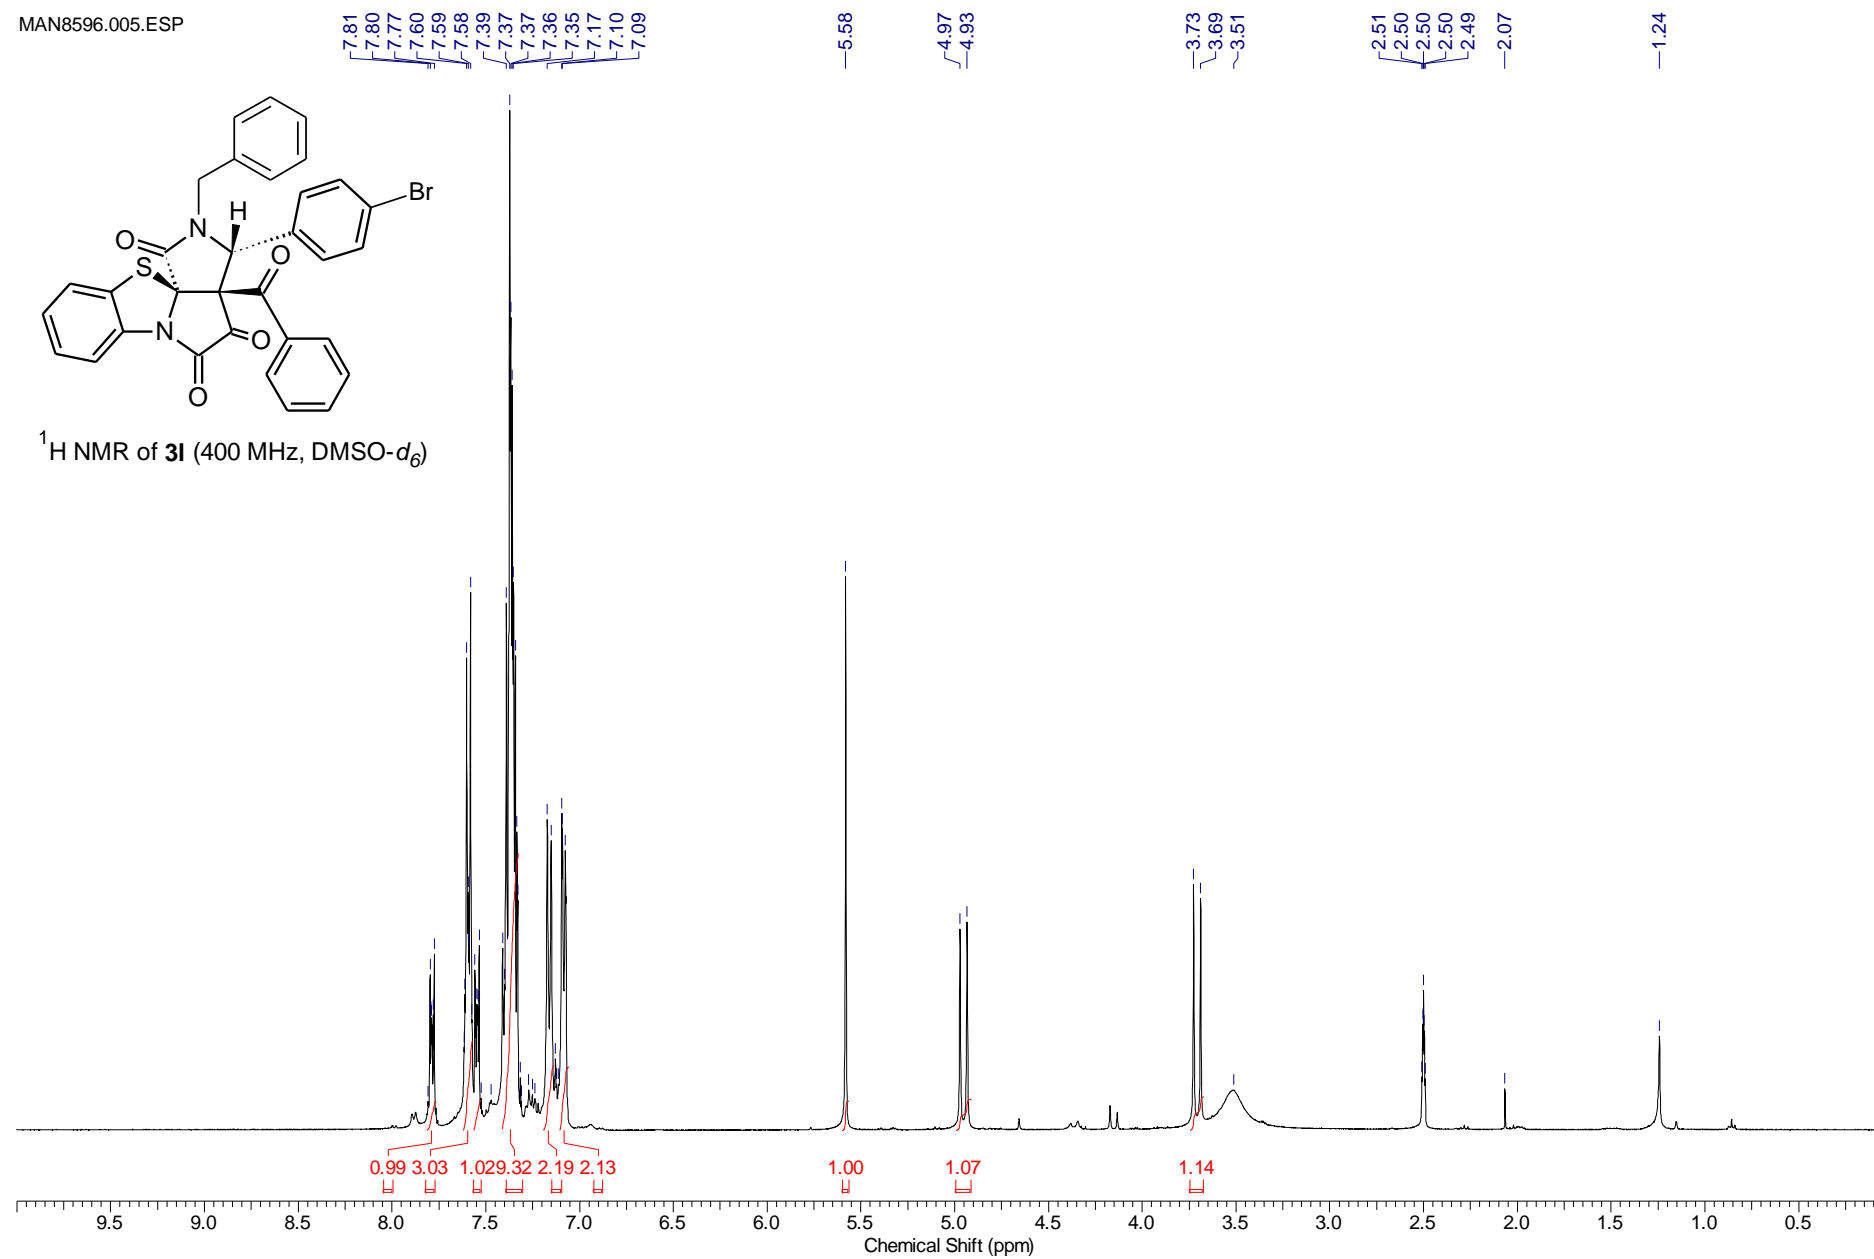

MAN8596.006

192.16  
191.28

166.06

155.14

134.74  
134.58  
134.03  
132.59  
131.87  
129.79  
128.75  
128.31  
128.10  
128.00  
126.31  
122.61  
117.34

78.89

65.57  
63.86

45.36  
40.15  
39.94  
39.73  
39.52  
39.31  
39.10  
38.89

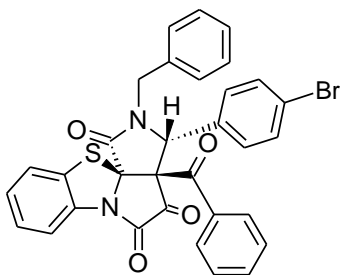

$^{13}\text{C}$  NMR of **3I** (100 MHz, DMSO- $d_6$ )

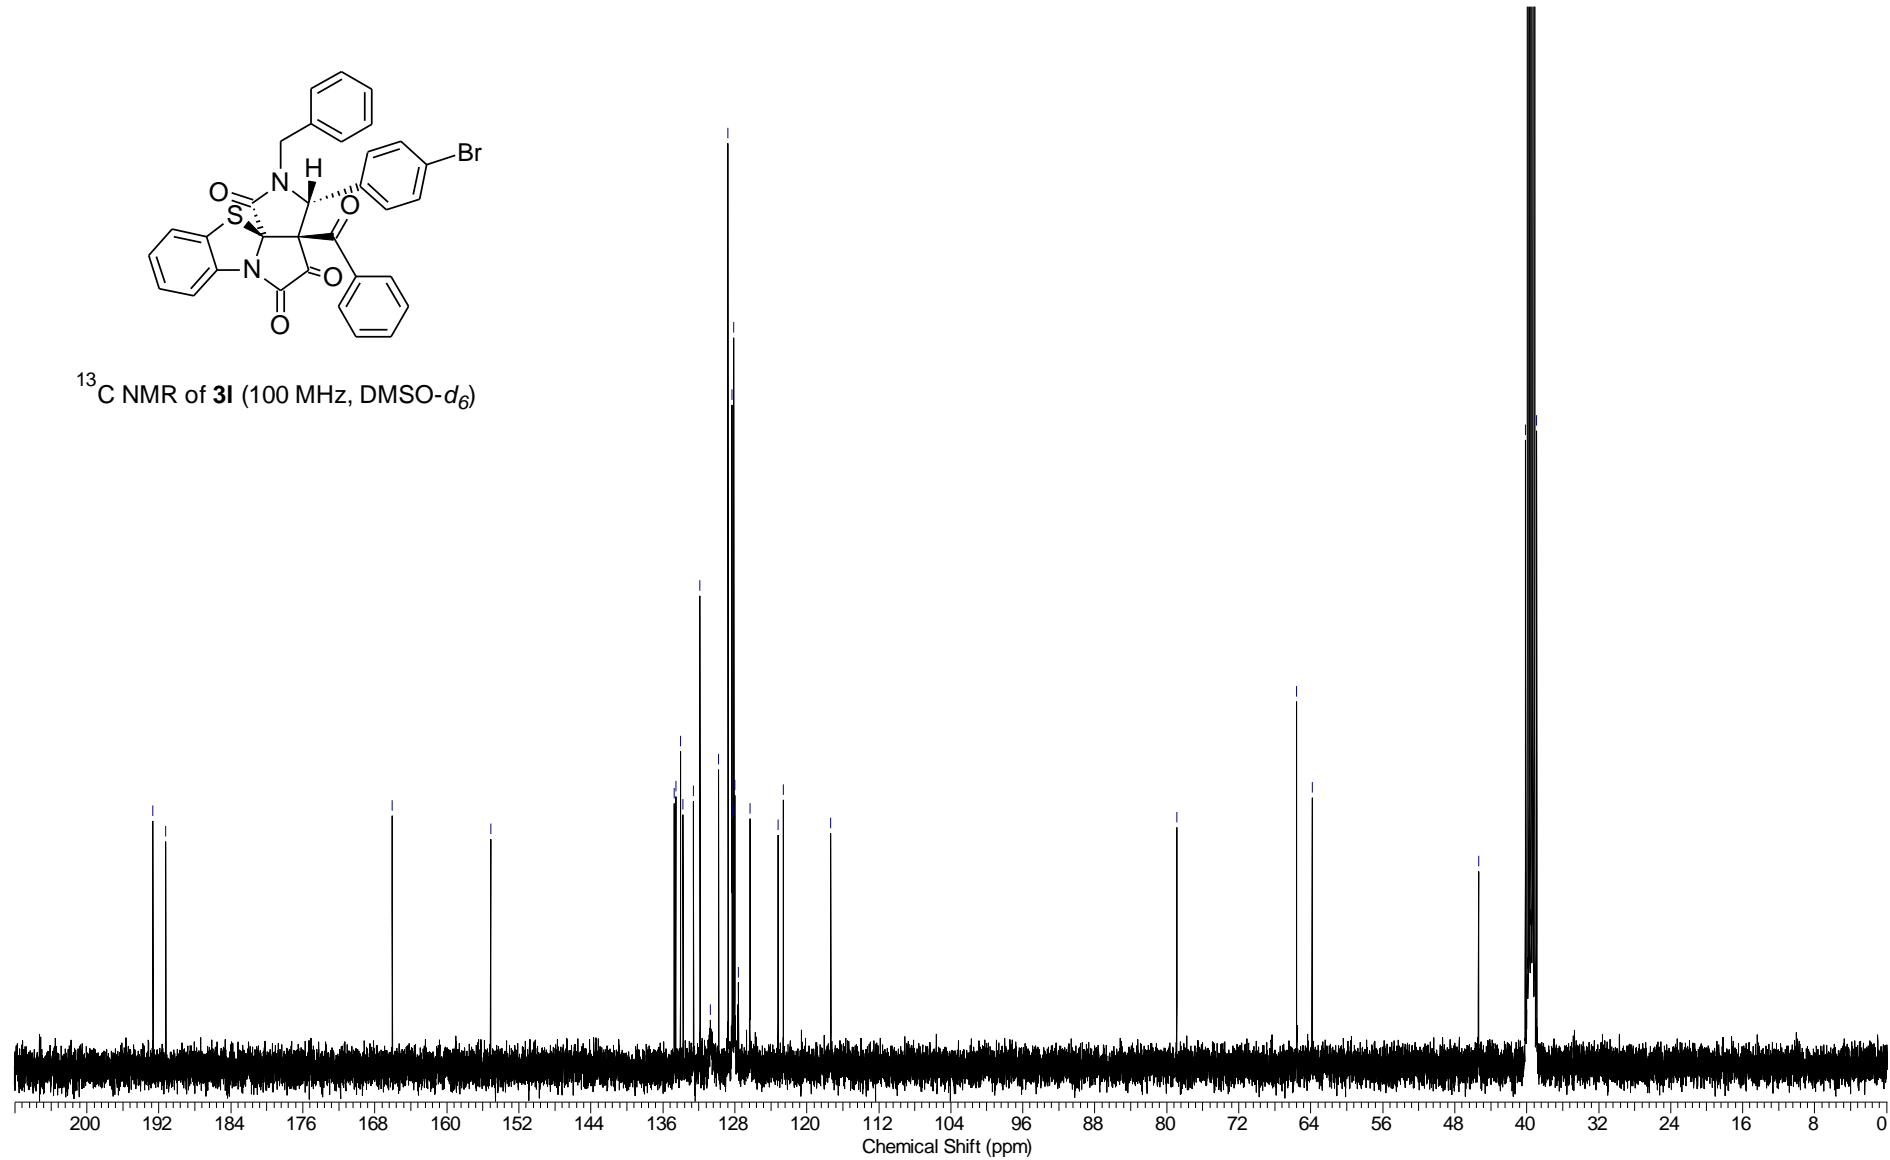

MAN8596.007.ESP

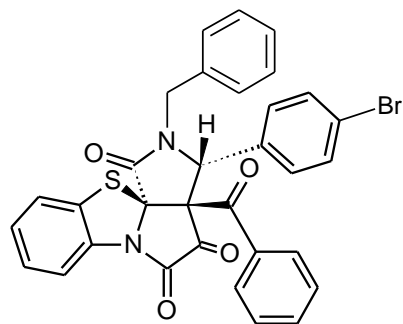

DEPT135 of **3I** (100 MHz, DMSO- $d_6$ )

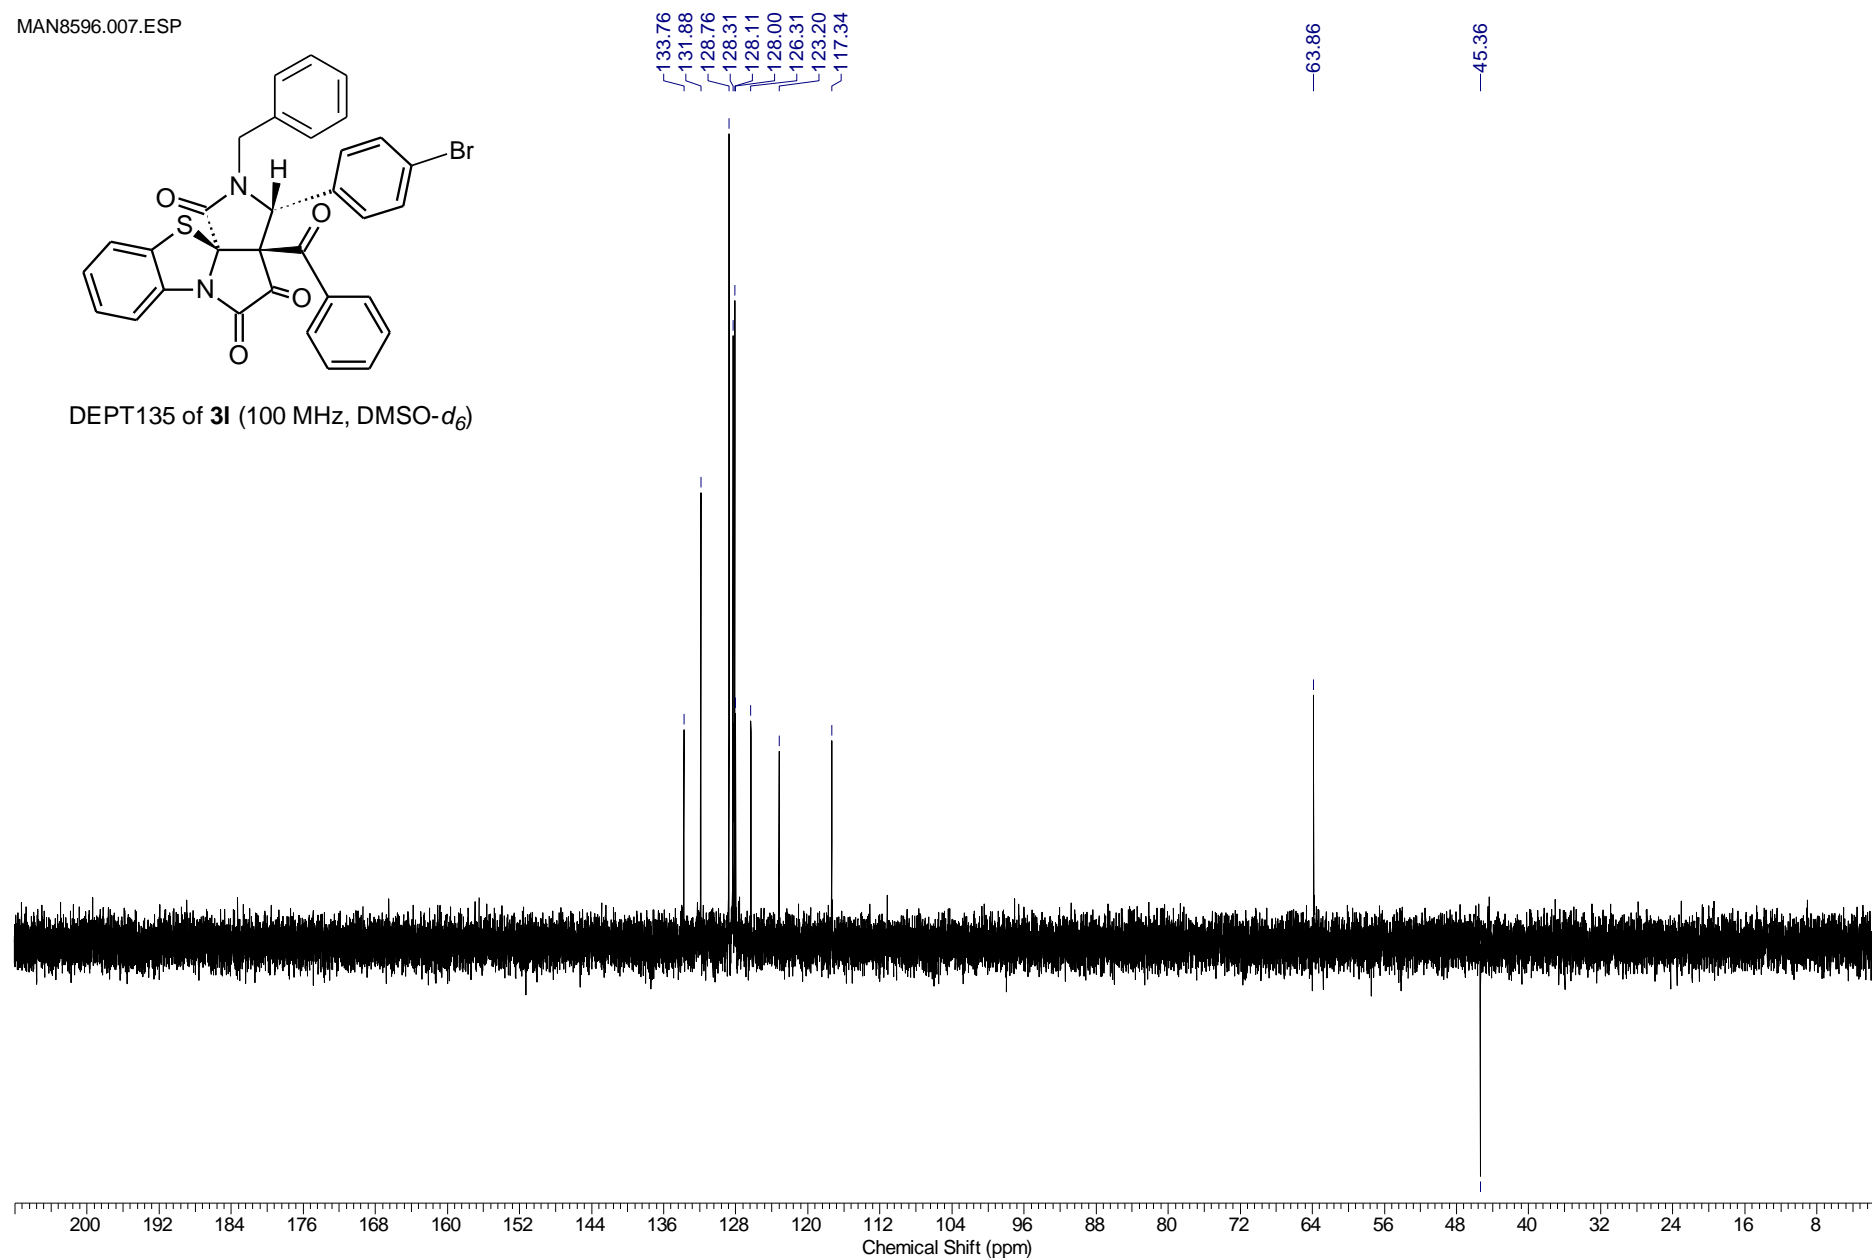

MAN8422.001.ESP

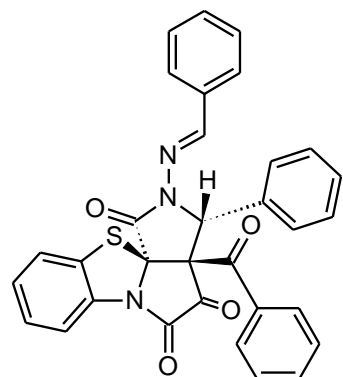

$^1\text{H}$  NMR of **3m** (400 MHz,  $\text{DMSO}-d_6$ )

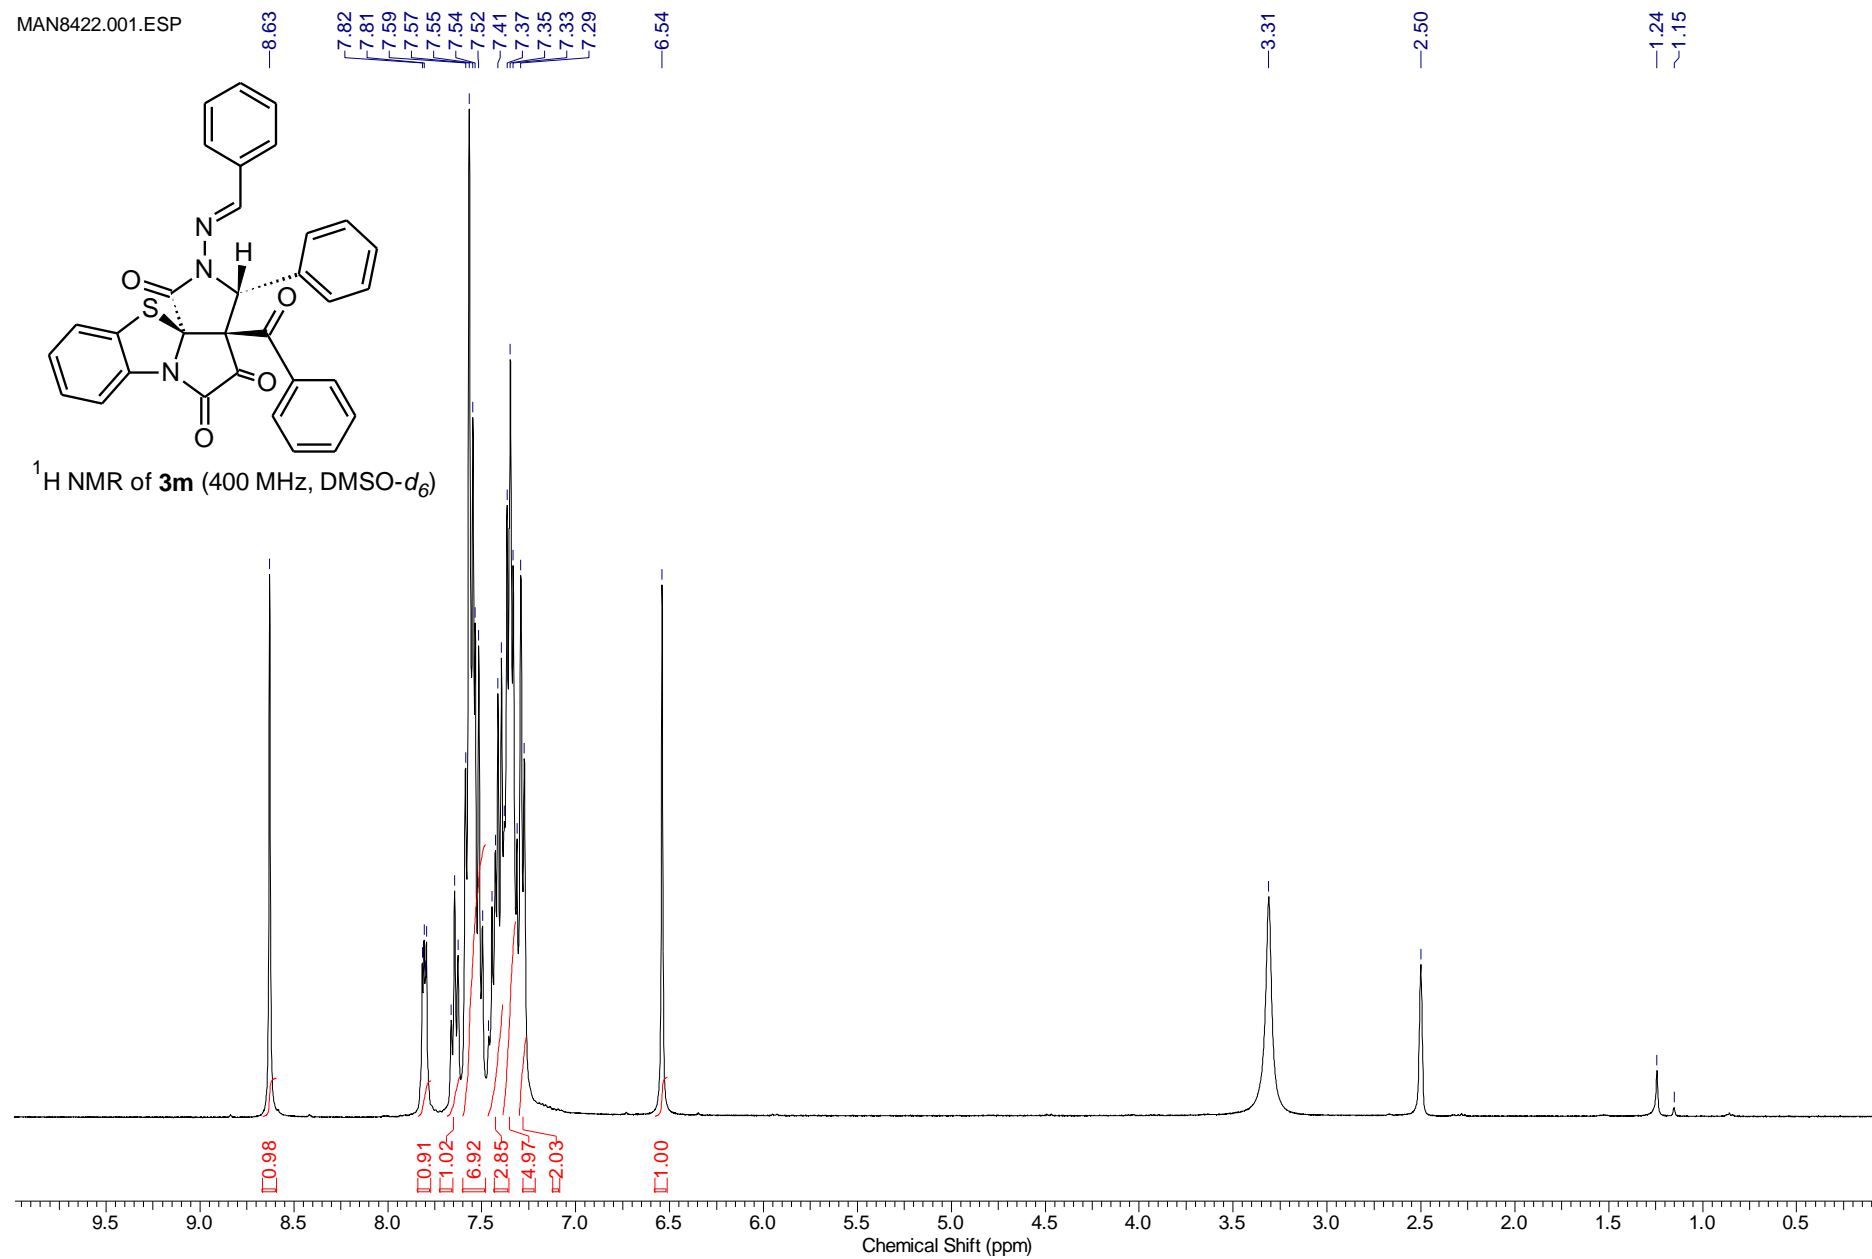

MAN8422.002.100

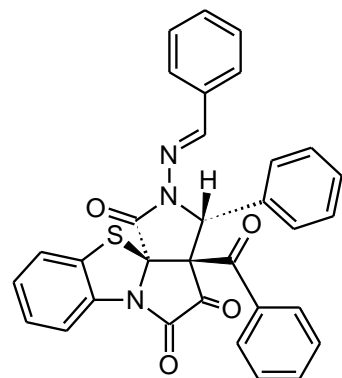

$^{13}\text{C}$  NMR of **3m** (100 MHz,  $\text{DMSO}-d_6$ )

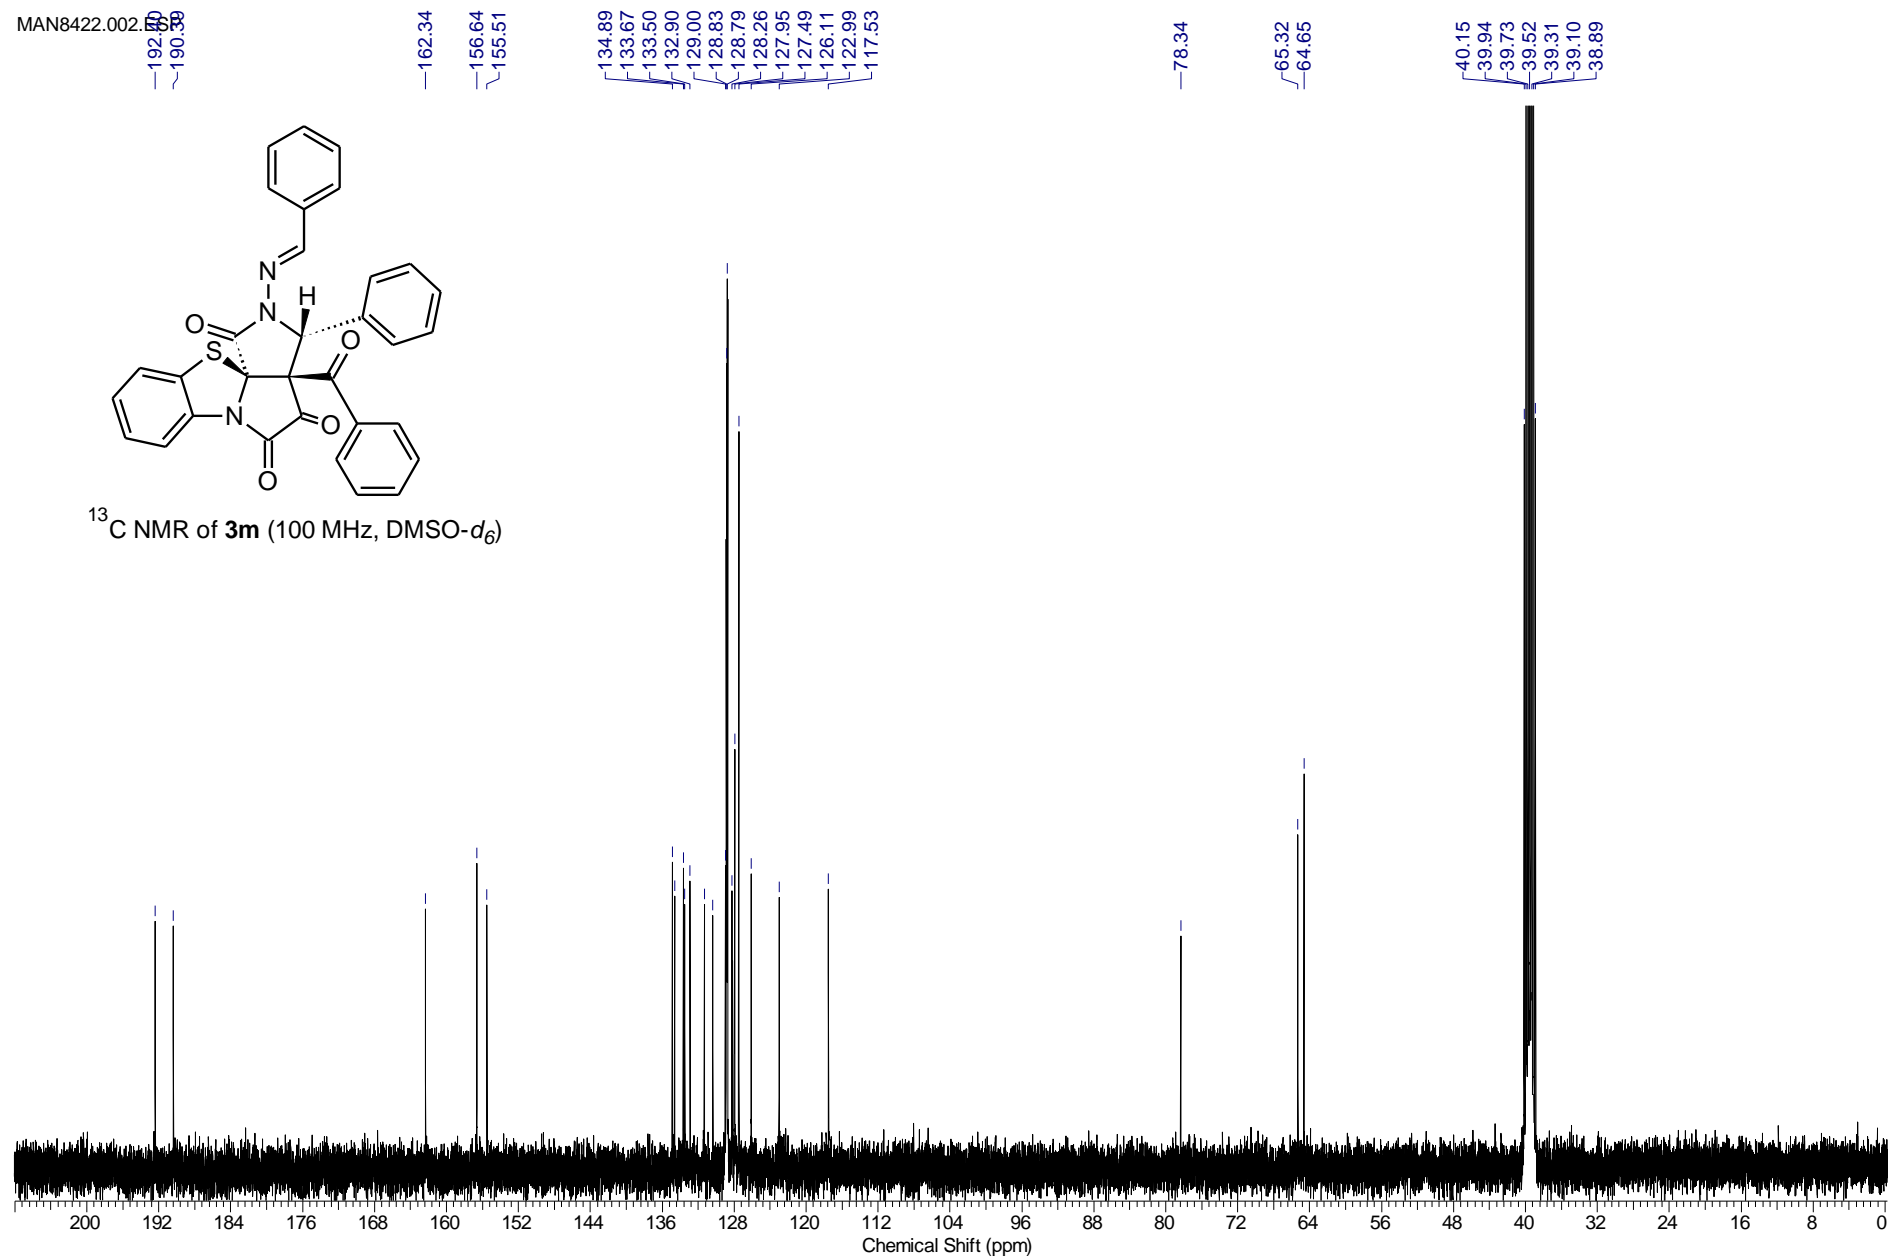

MAN8422.003.ESP

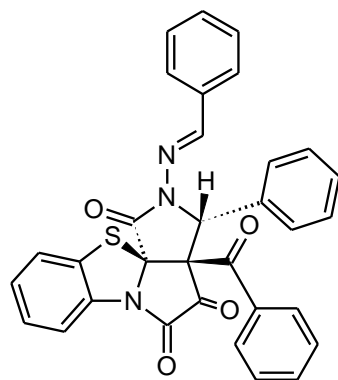

DEPT135 of **3m** (100 MHz, DMSO- $d_6$ )

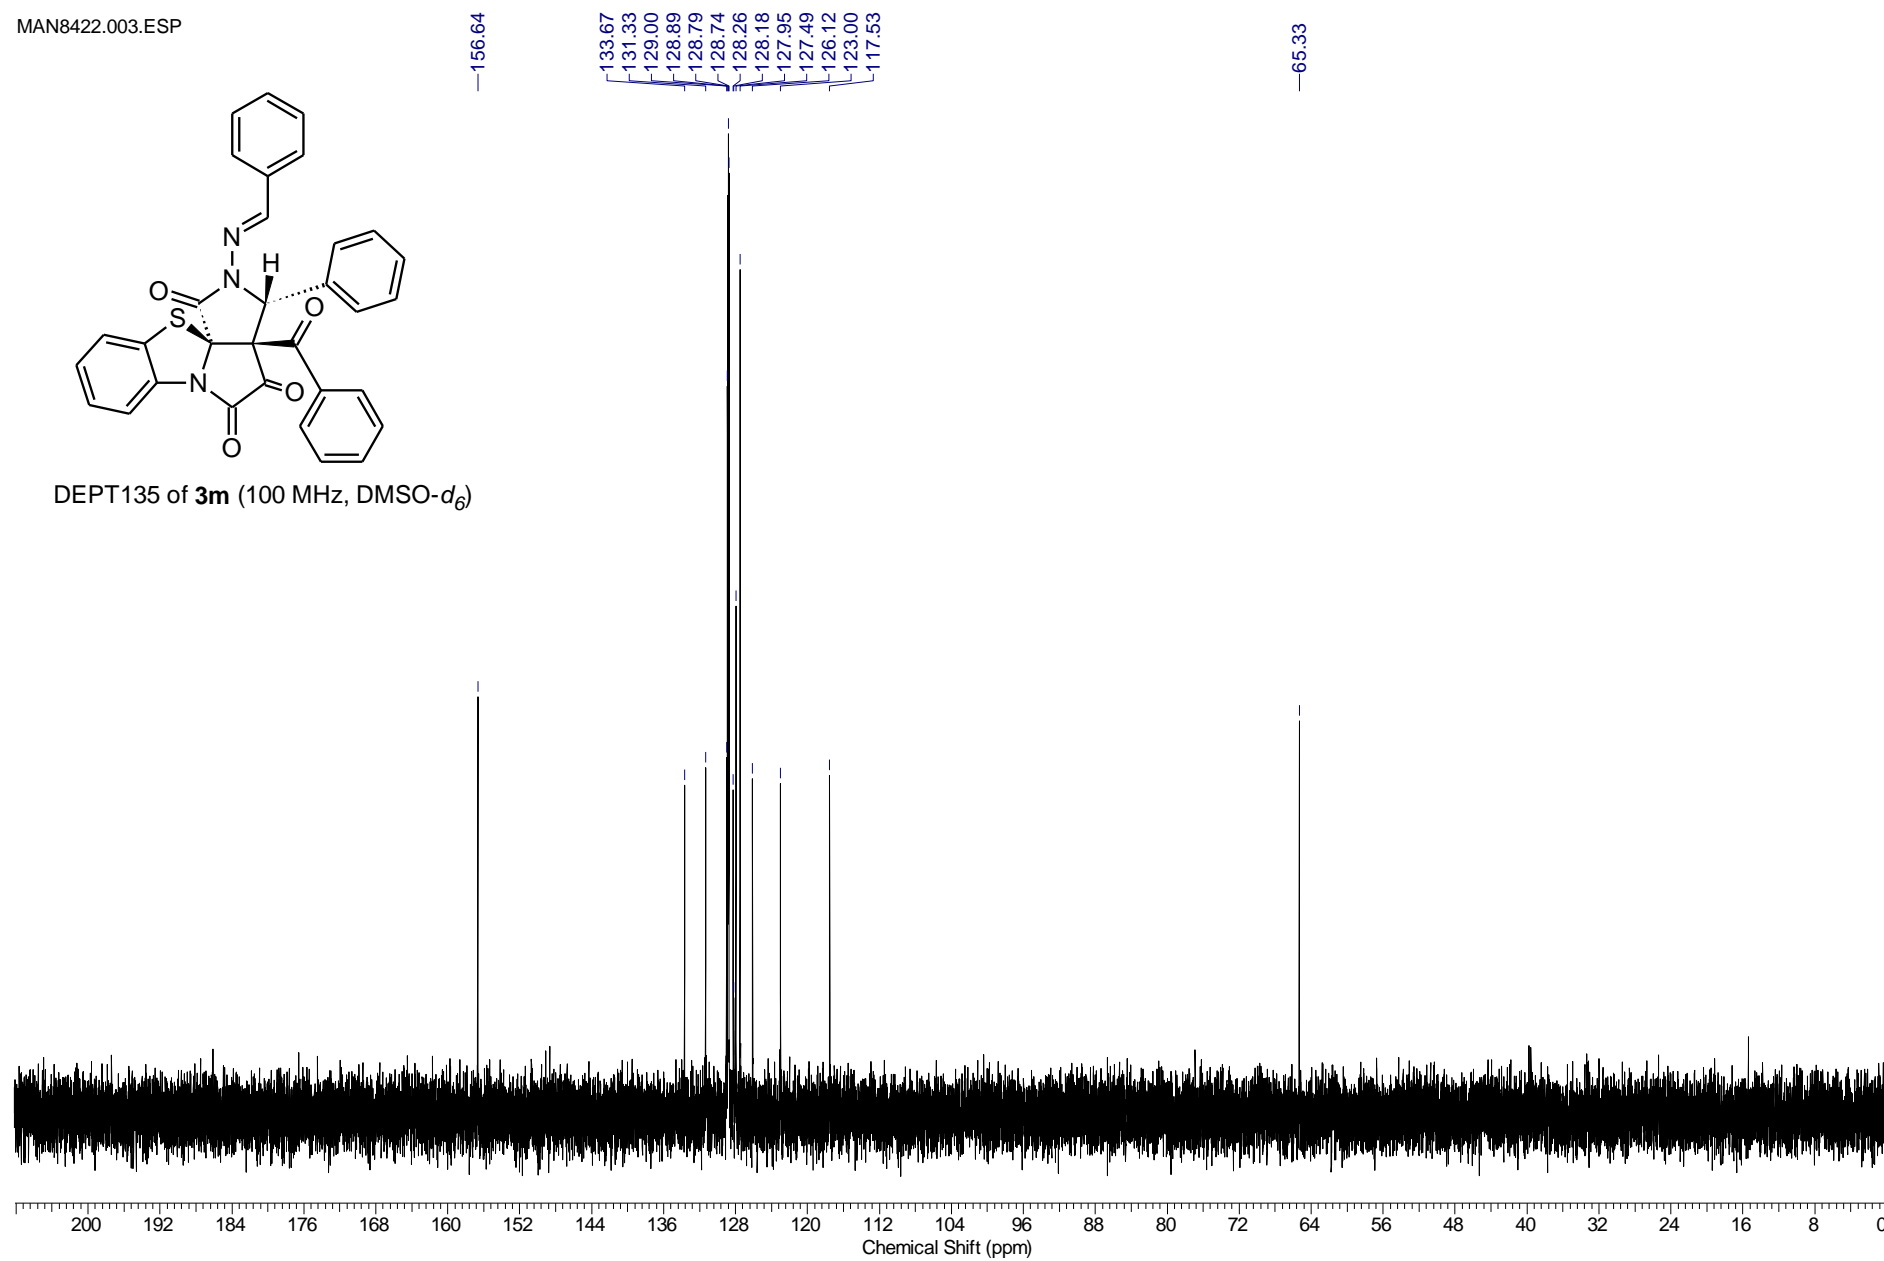



MAN7116.004.ESP

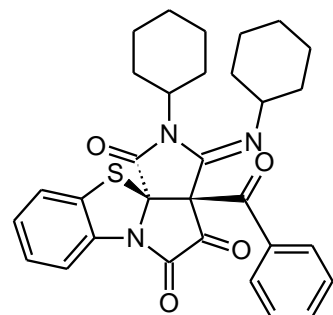

$^1\text{H}$  NMR of **8a** (400 MHz,  $\text{CDCl}_3$ )

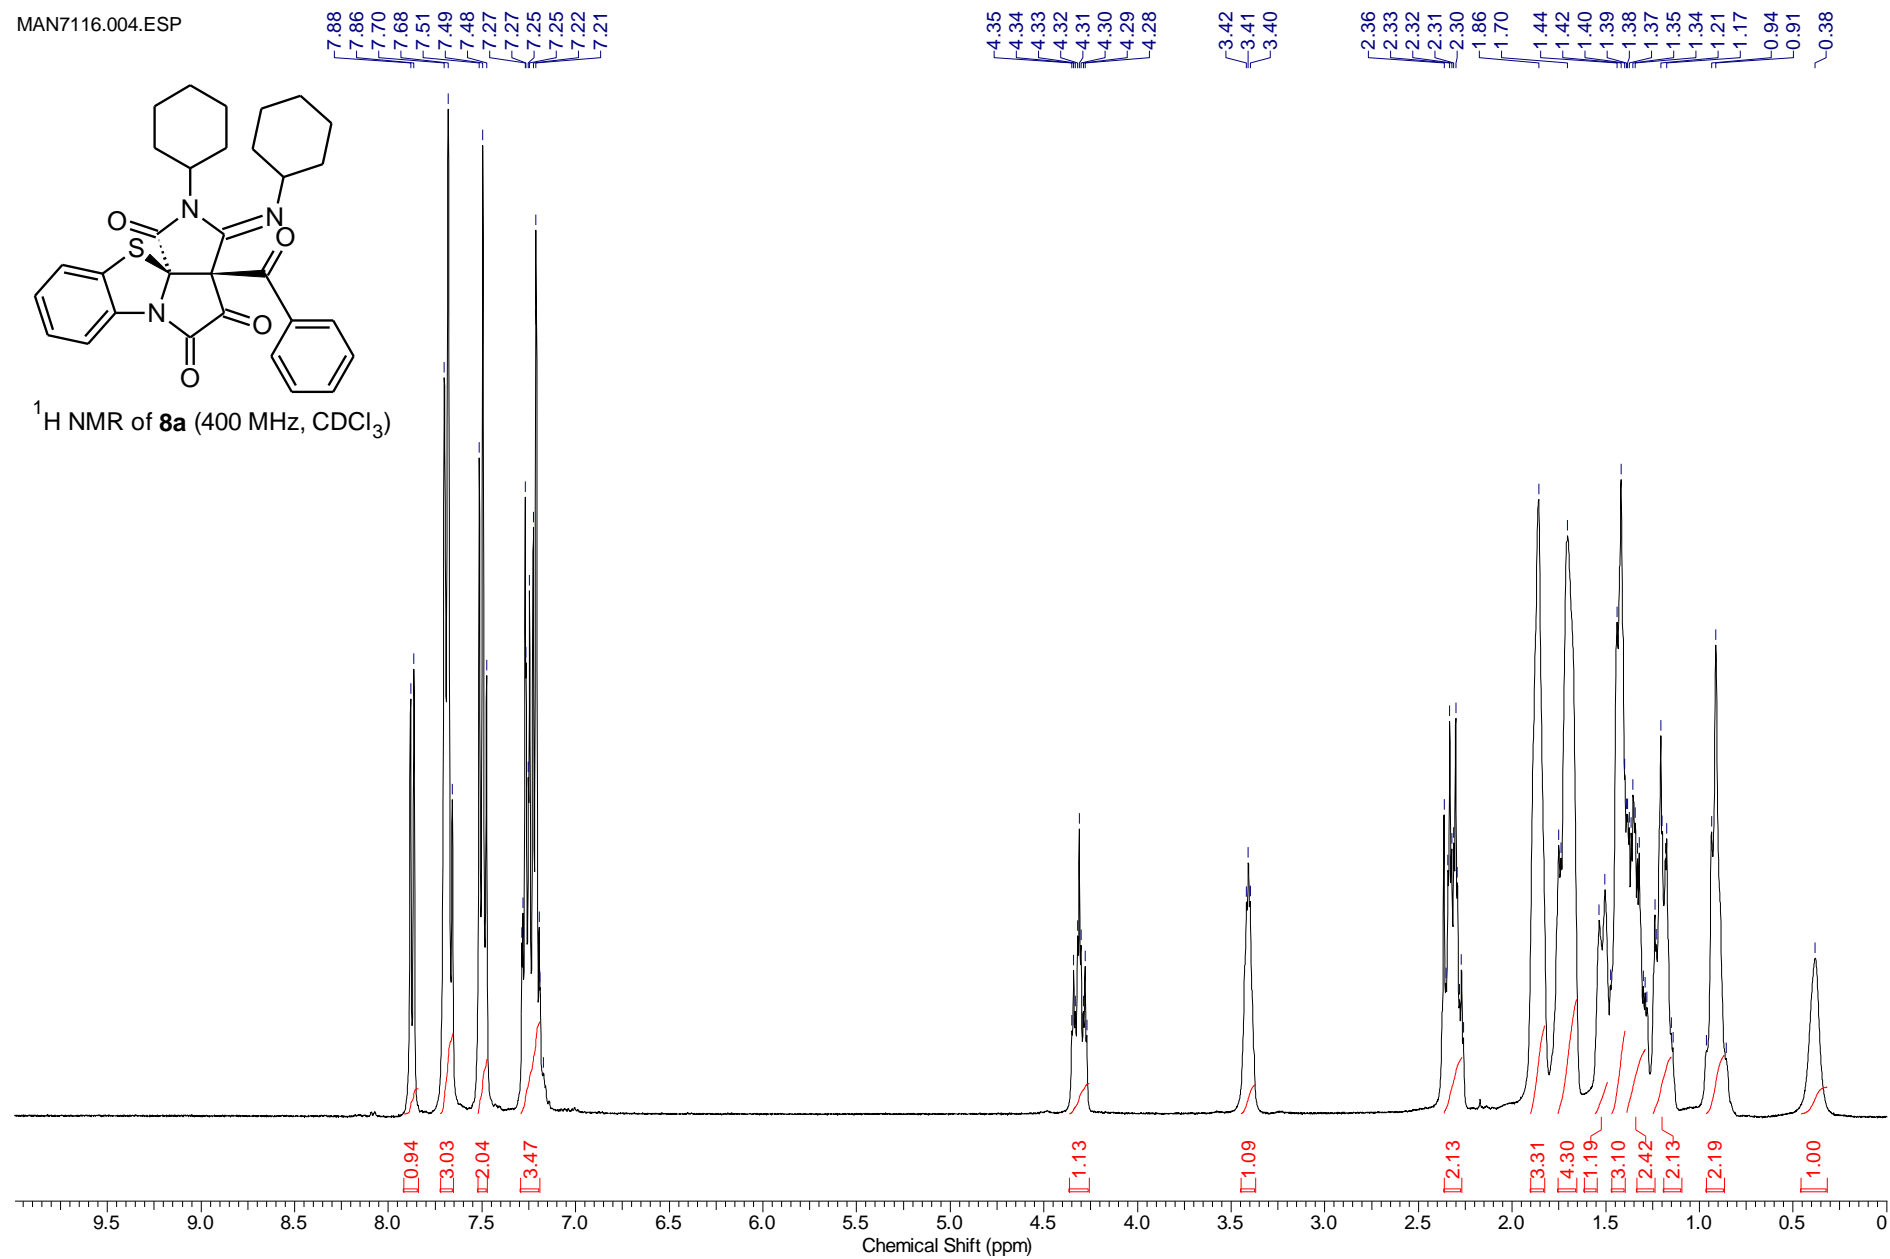

MAN7116.002.E53

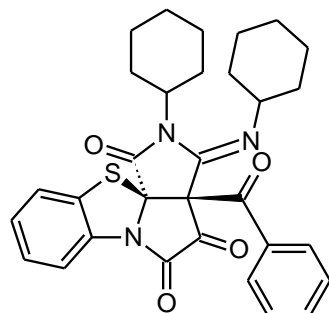

$^{13}\text{C}$  NMR of **8a** (100 MHz,  $\text{CDCl}_3$ )

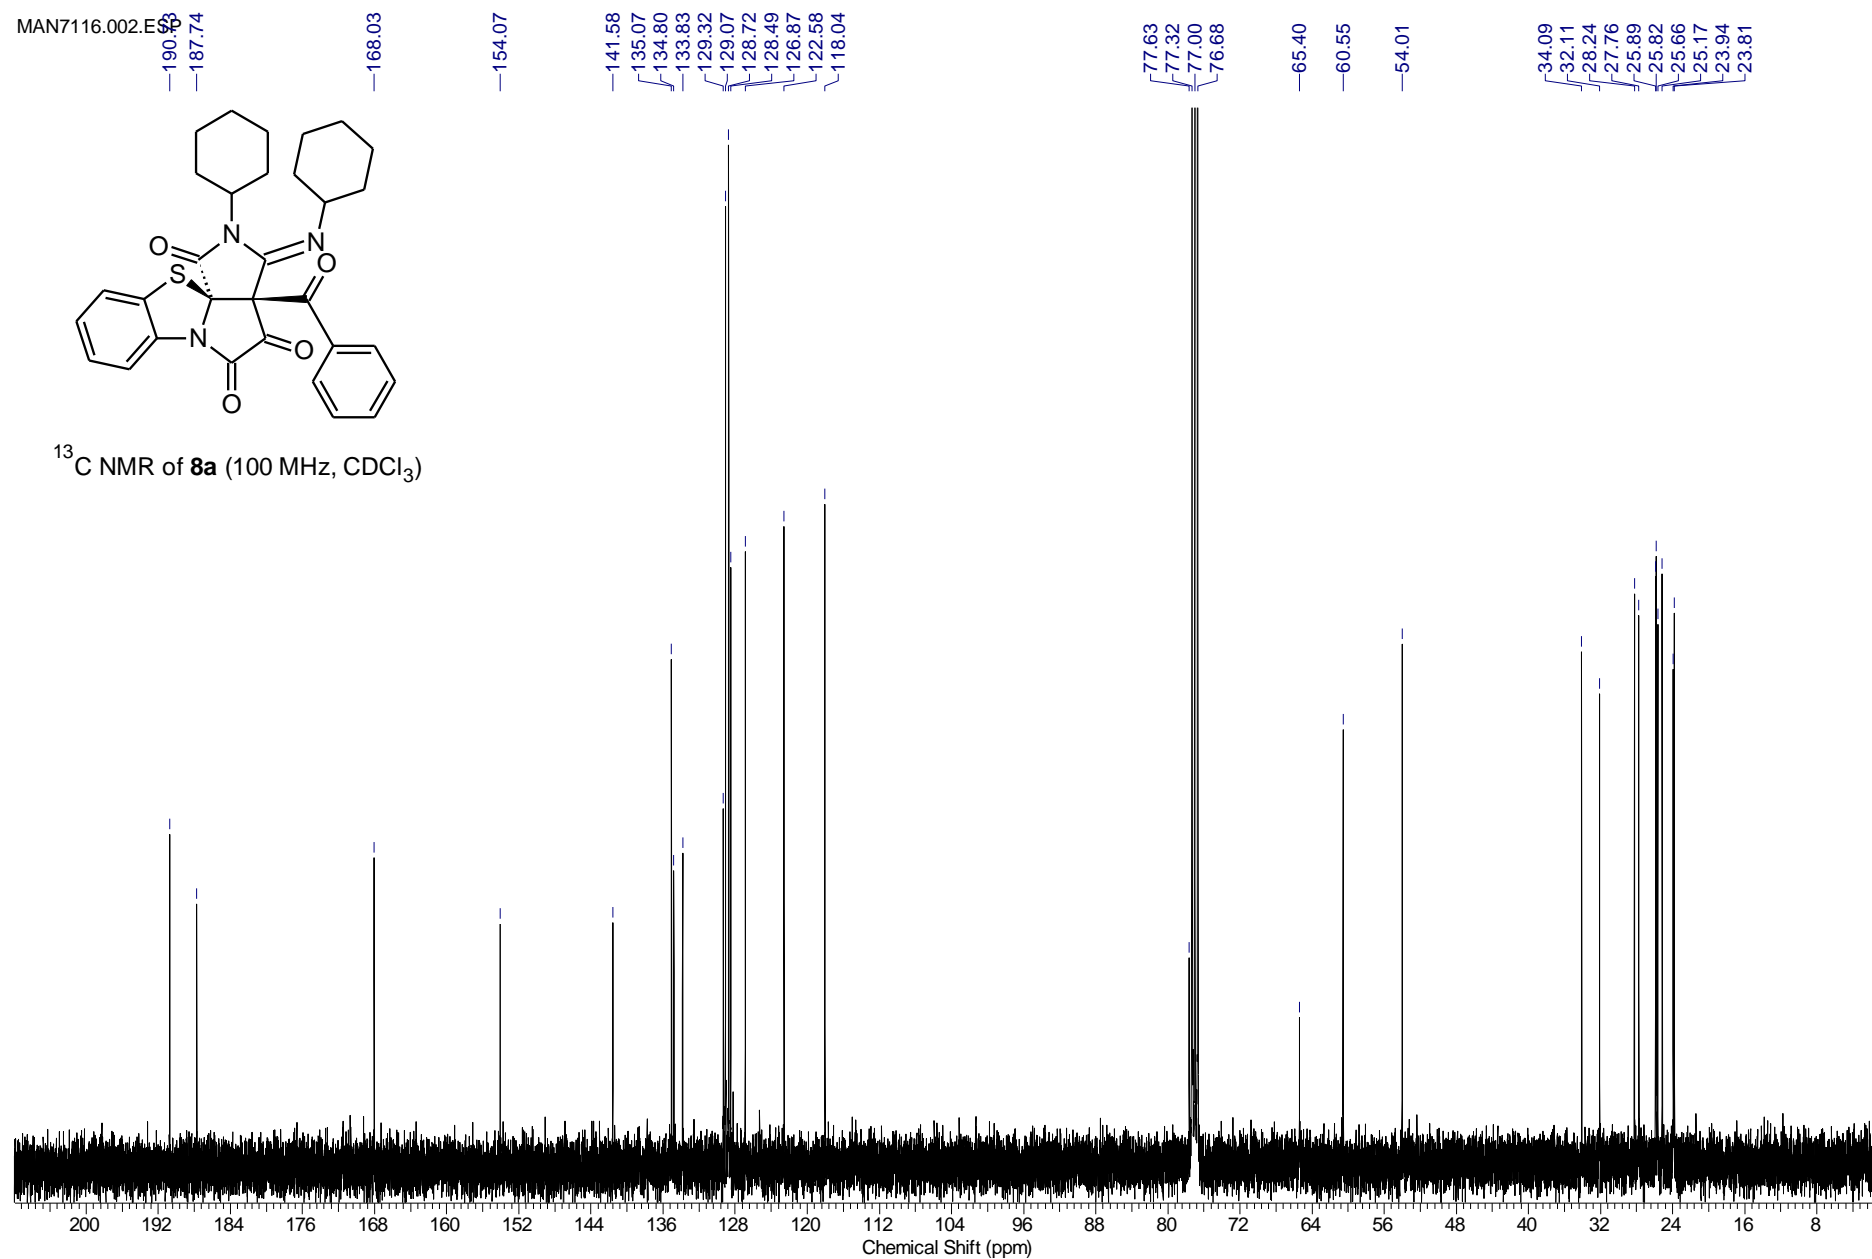

MAN7116.003.ESP

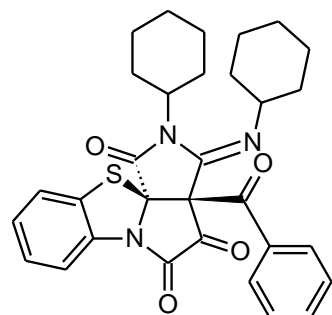

$^{13}\text{C}$  NMR of **8a** (100 MHz,  $\text{CDCl}_3$ )

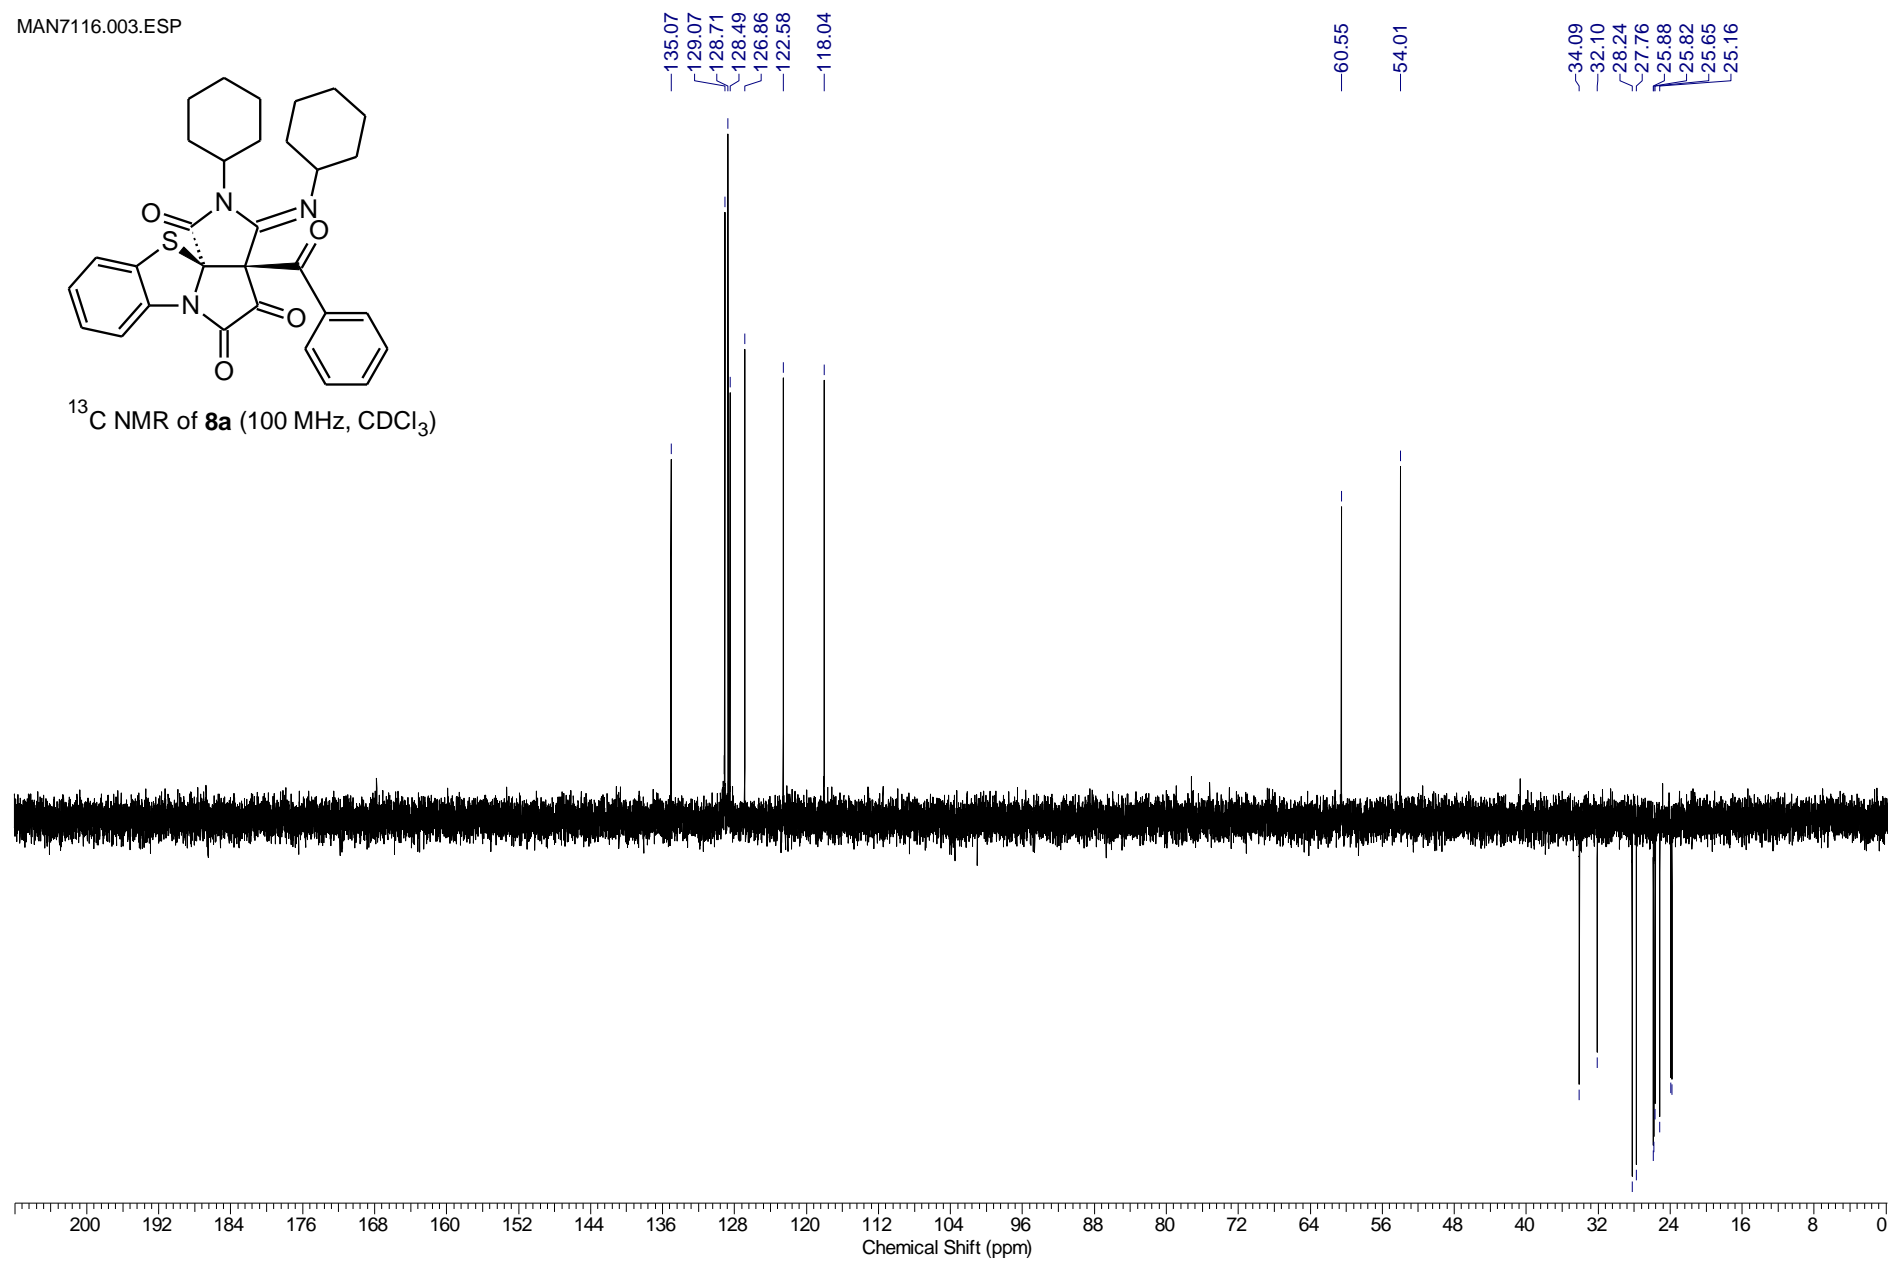

MAN7166.004.ESP

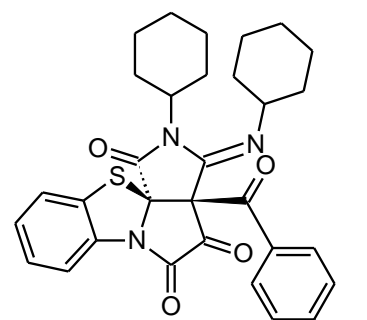

$^1\text{H}$  NMR of **8b** (400 MHz,  $\text{CDCl}_3$ )

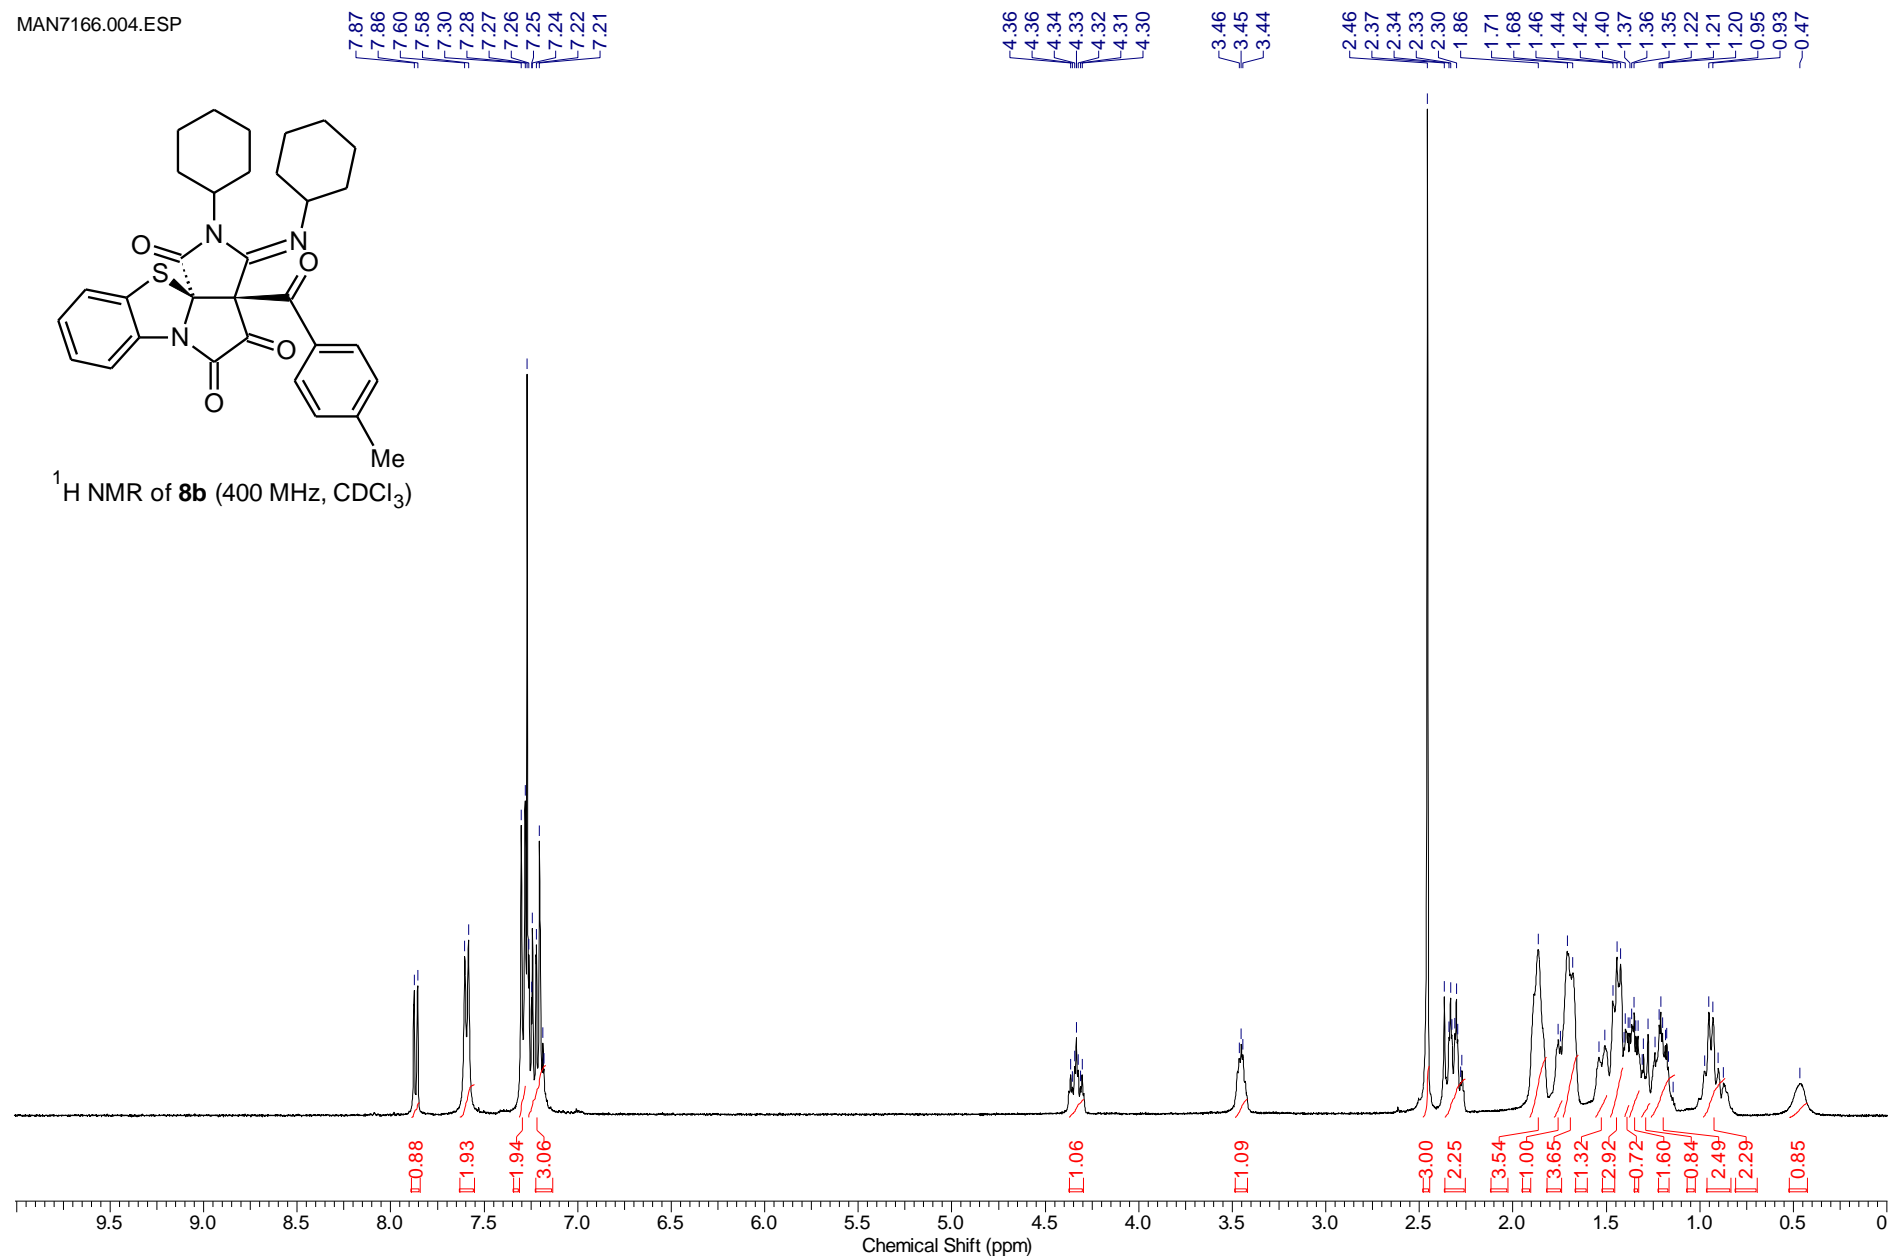

MAN7166.002.ES.18

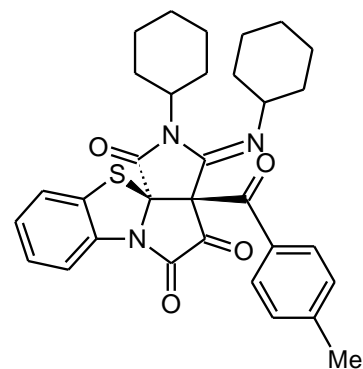

$^{13}\text{C}$  NMR of **8b** (100 MHz,  $\text{CDCl}_3$ )

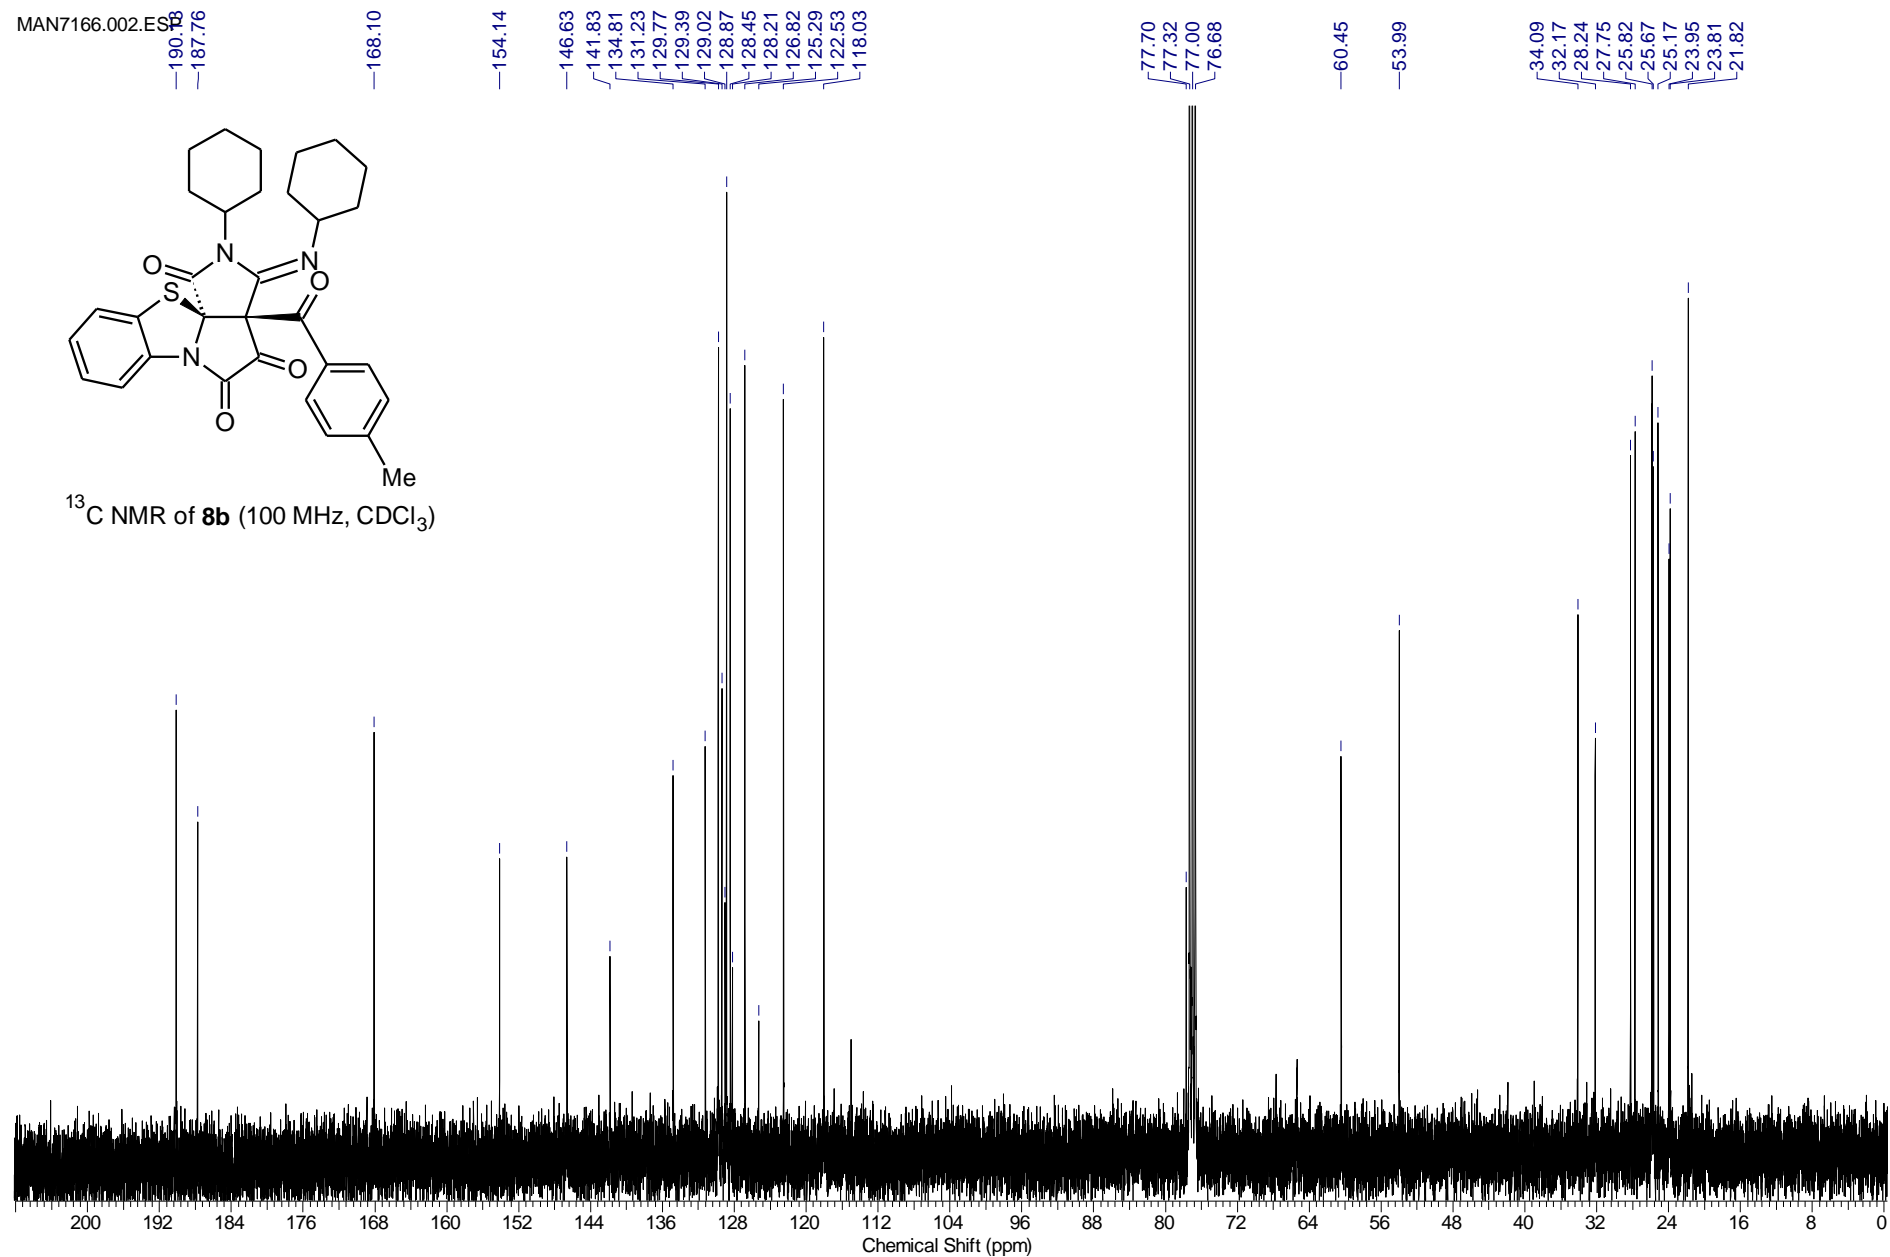

MAN7166.003.ESP

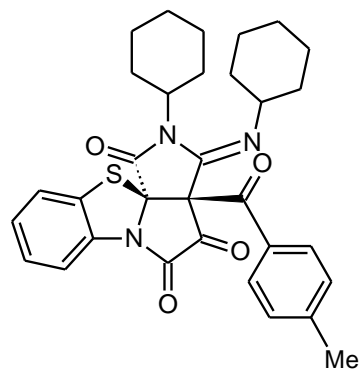

DEPT135 of **8b** (100 MHz, CDCl<sub>3</sub>)

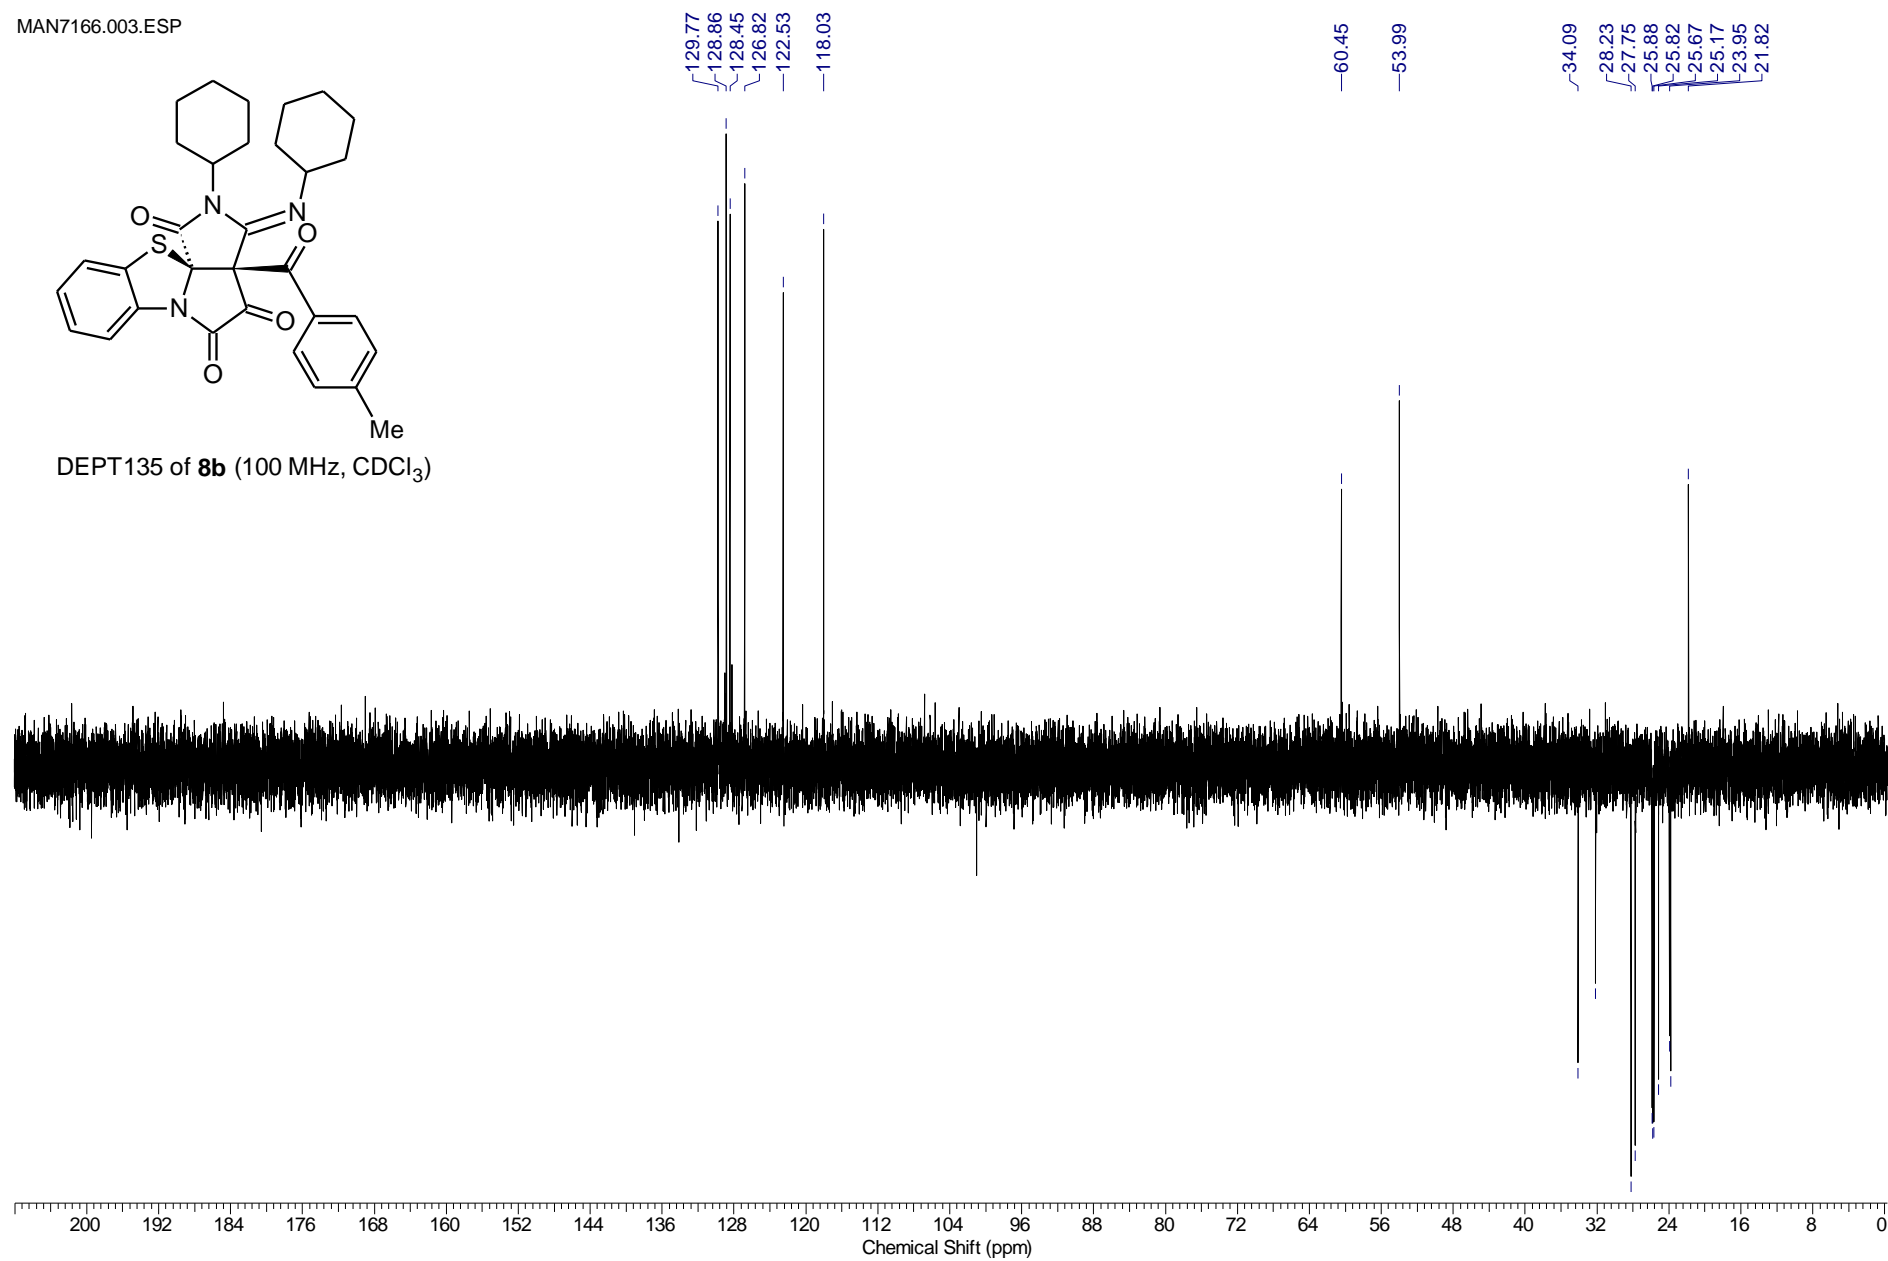

MAN8476.001.ESP

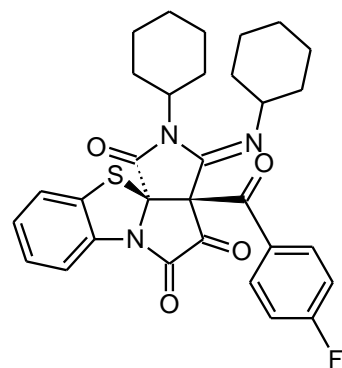

$^1\text{H}$  NMR of **8c** (400 MHz,  $\text{CDCl}_3$ )

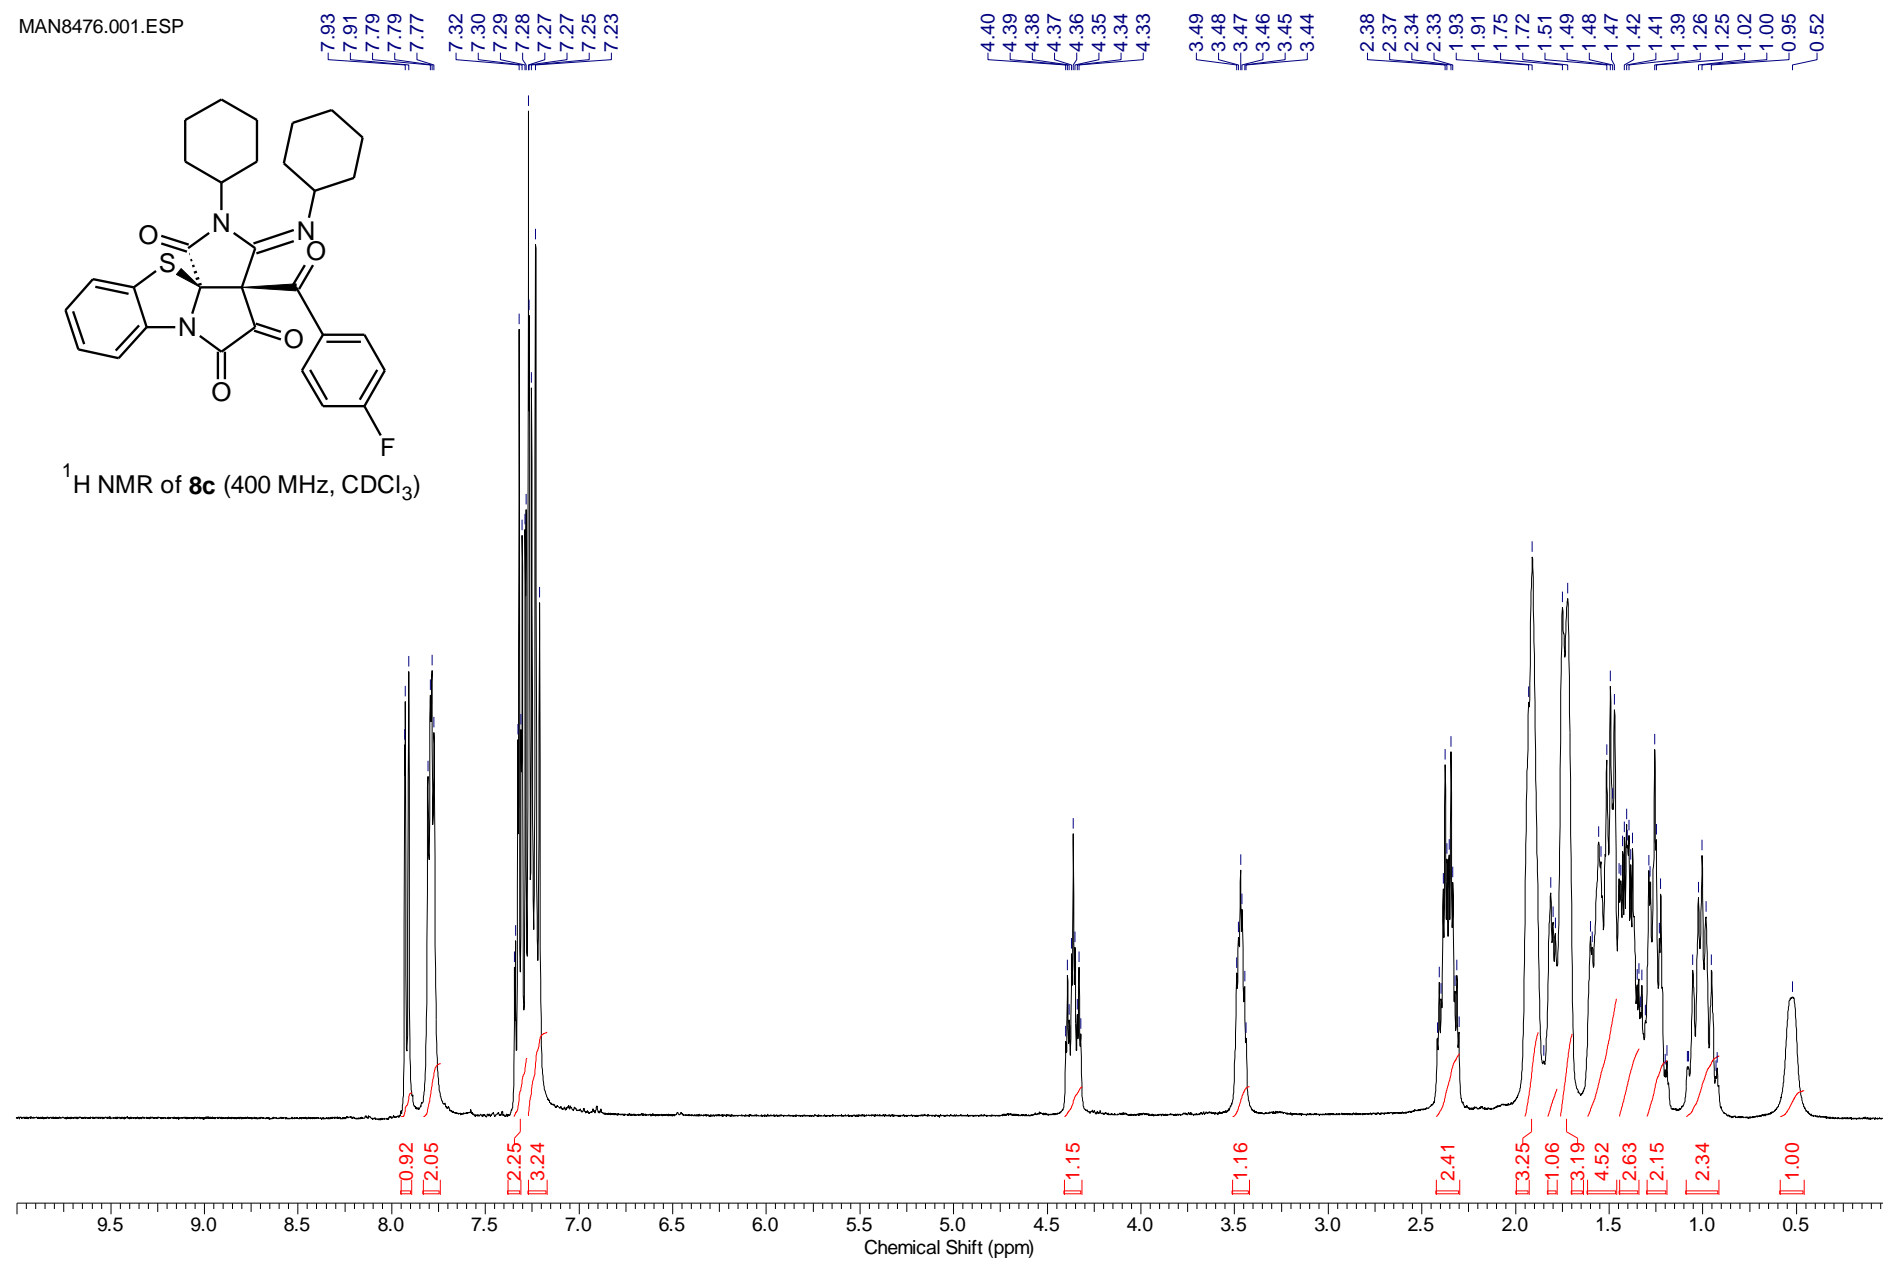

MAN8476.002.ESP

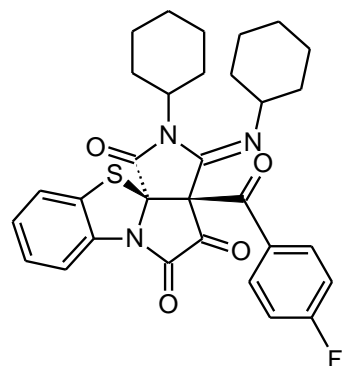

$^{13}\text{C}$  NMR of **8c** (100 MHz,  $\text{CDCl}_3$ )

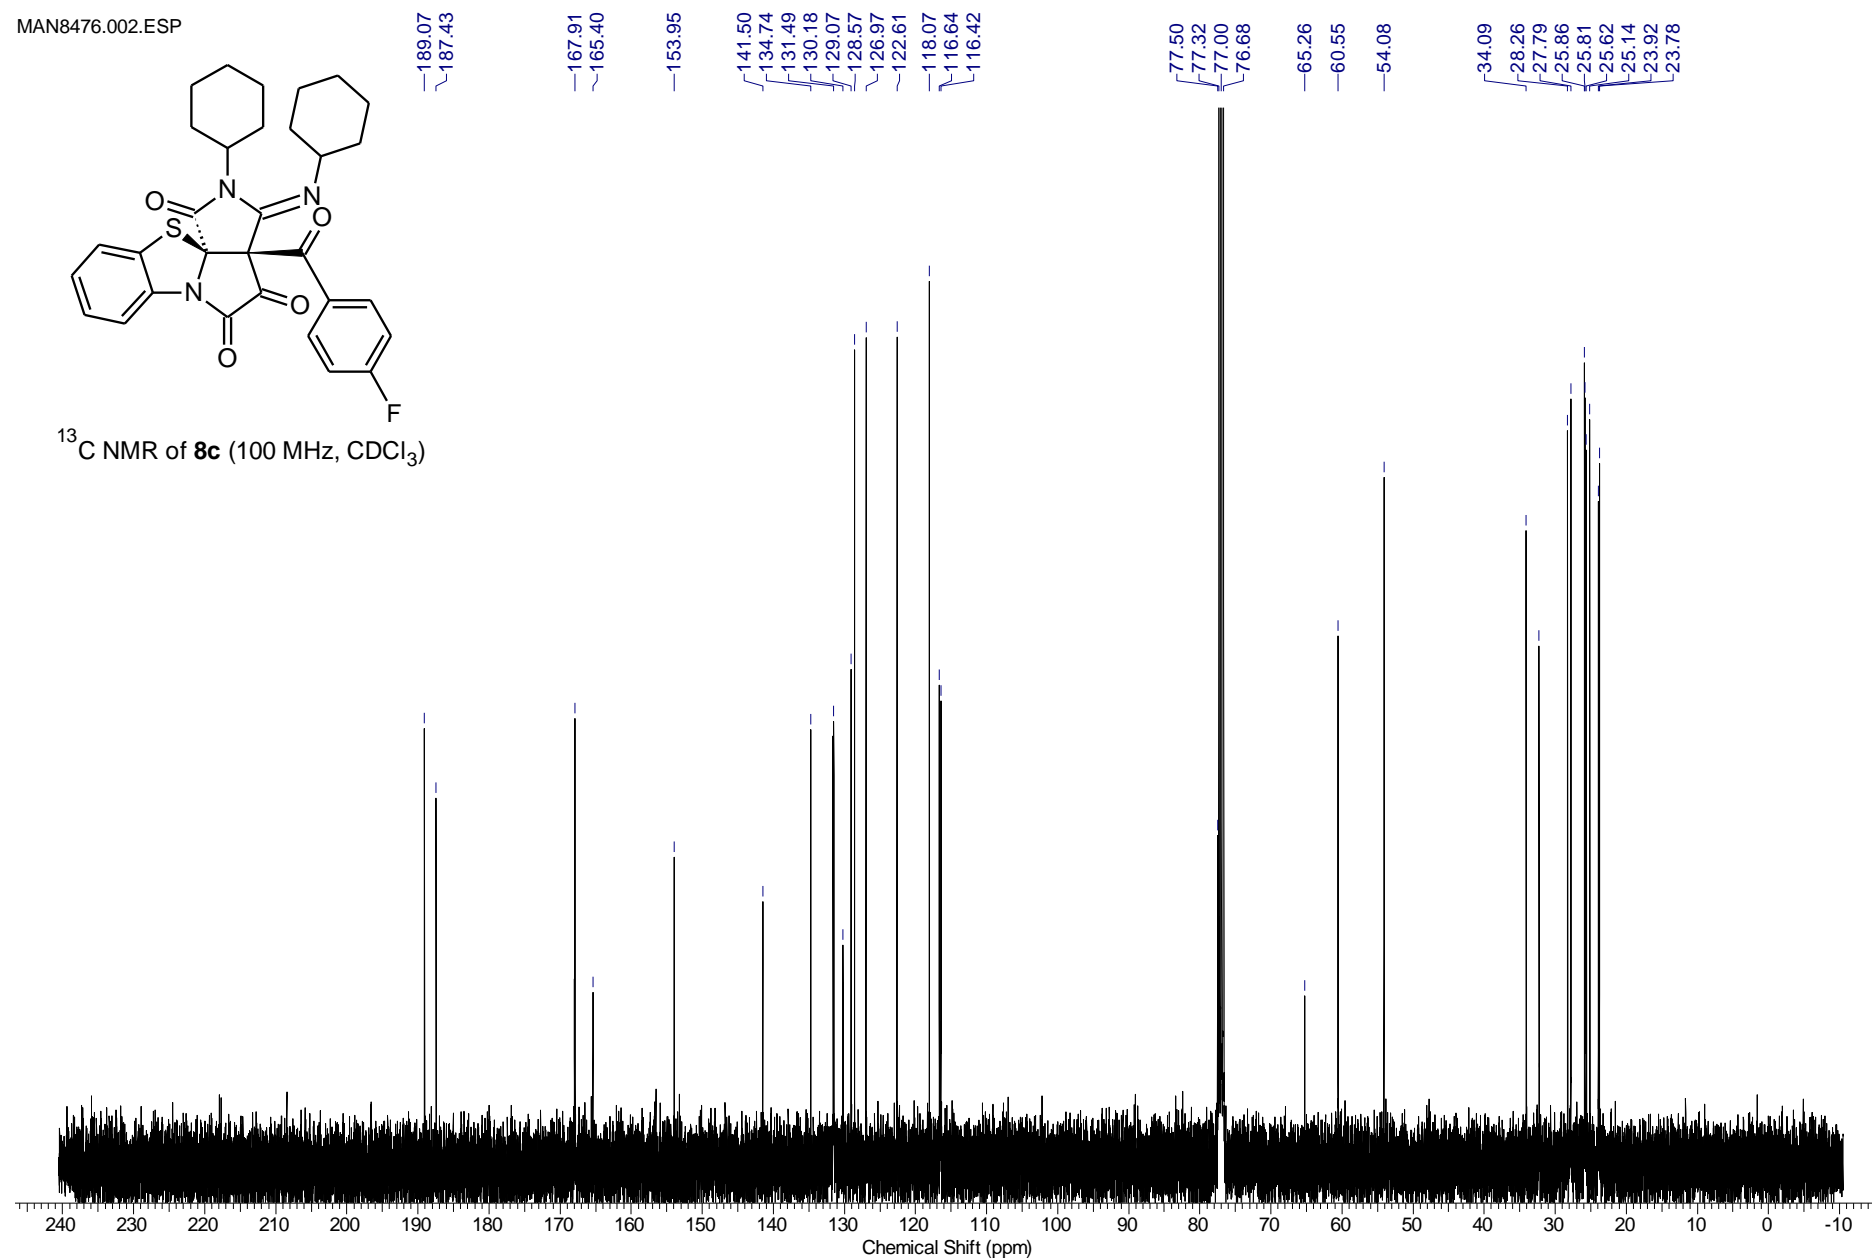



MAN8476.003.ESP

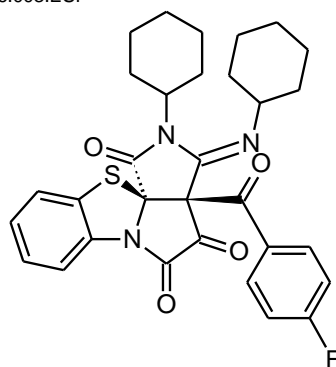

DEPT135 of **8c** (100 MHz, CDCl<sub>3</sub>)

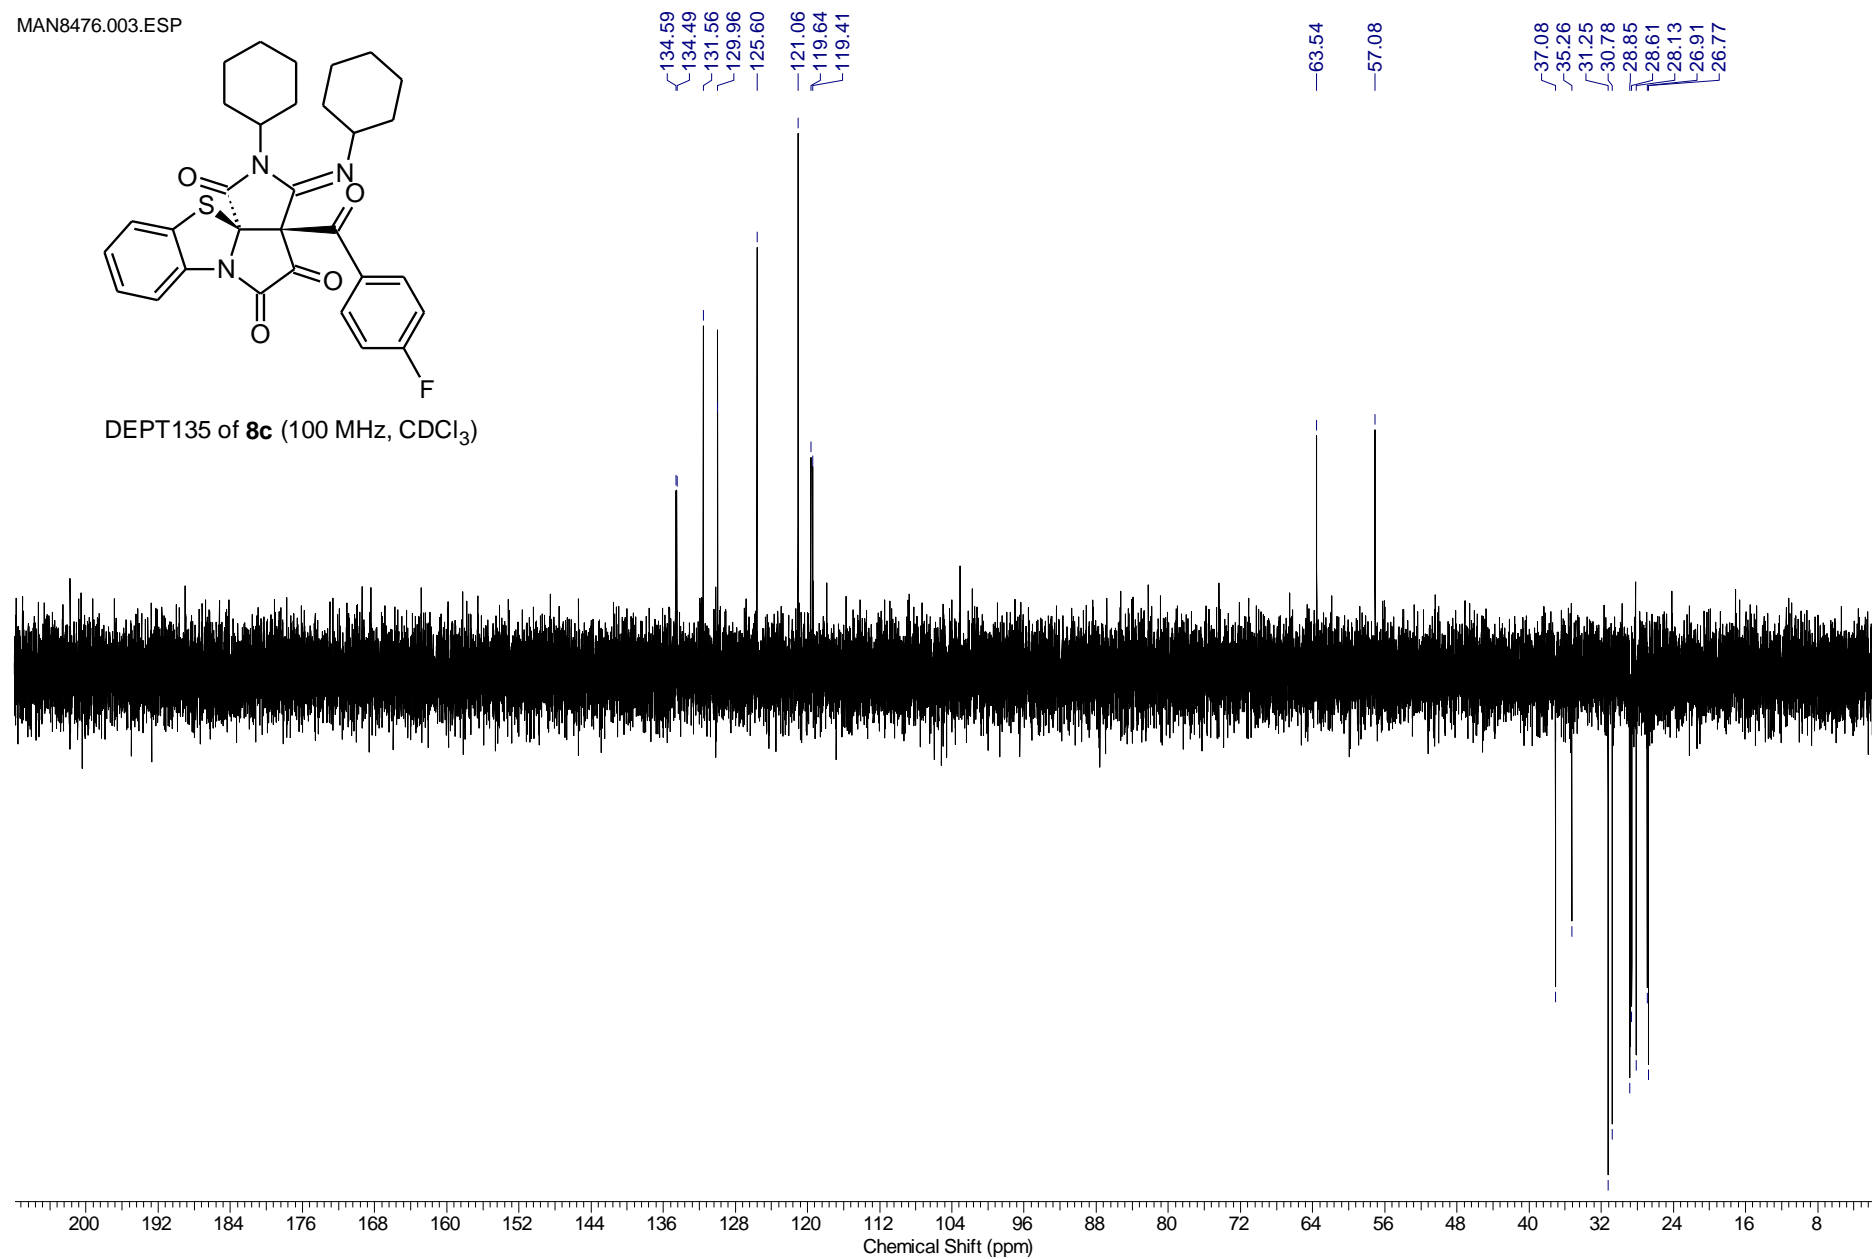

MAN8476.004.ESP

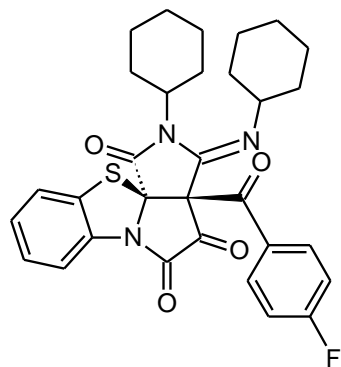

$^{19}\text{F}$  NMR of **8c** (376 MHz,  $\text{CDCl}_3$ )

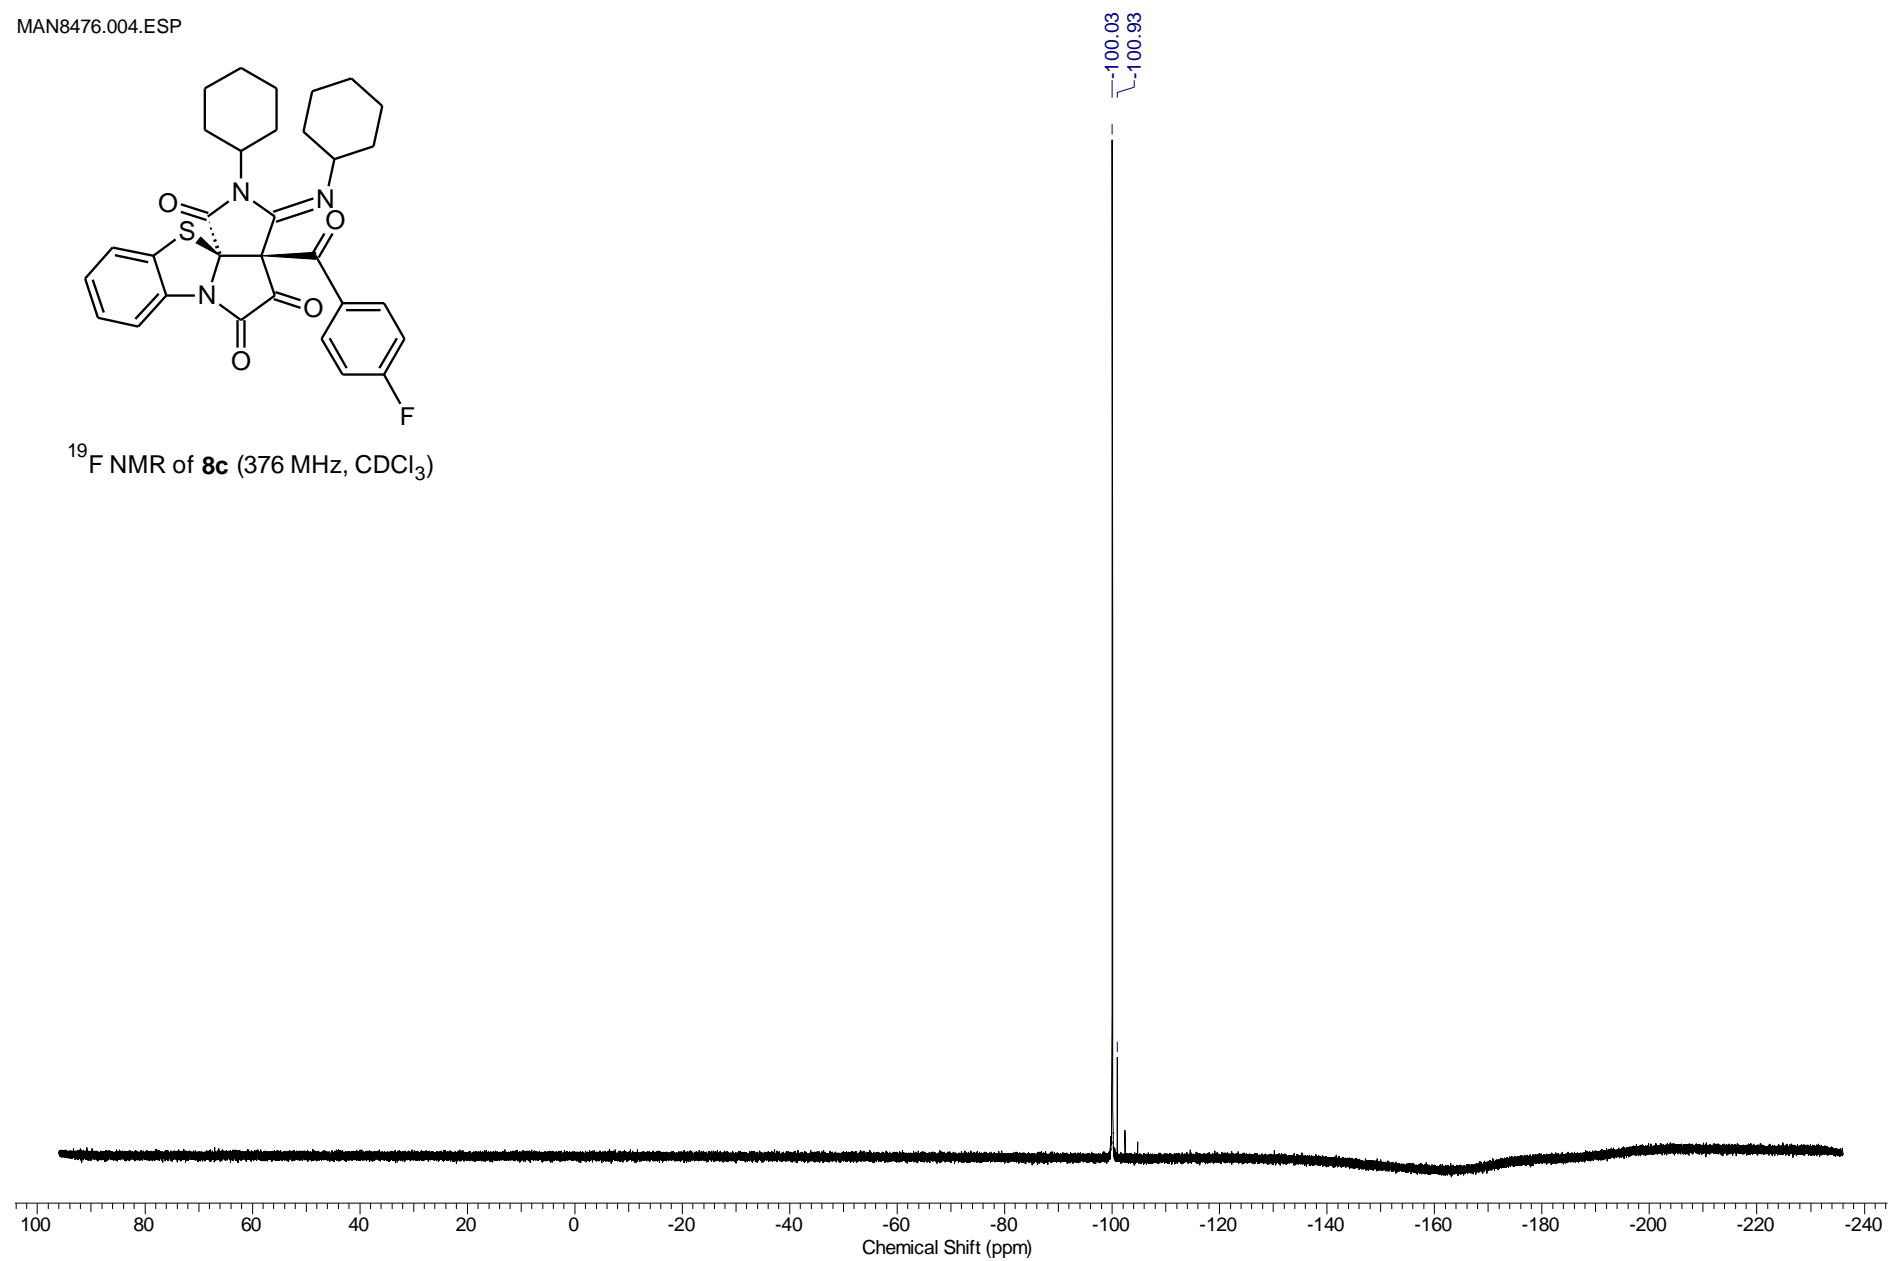

MAN8469.001.ESP

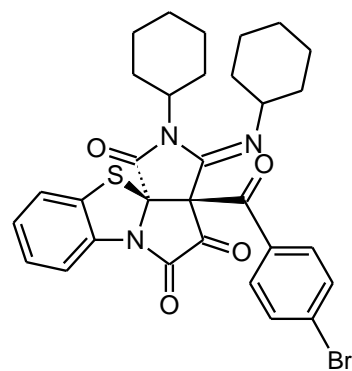

$^1\text{H}$  NMR of **8d** (400 MHz,  $\text{CDCl}_3$ )

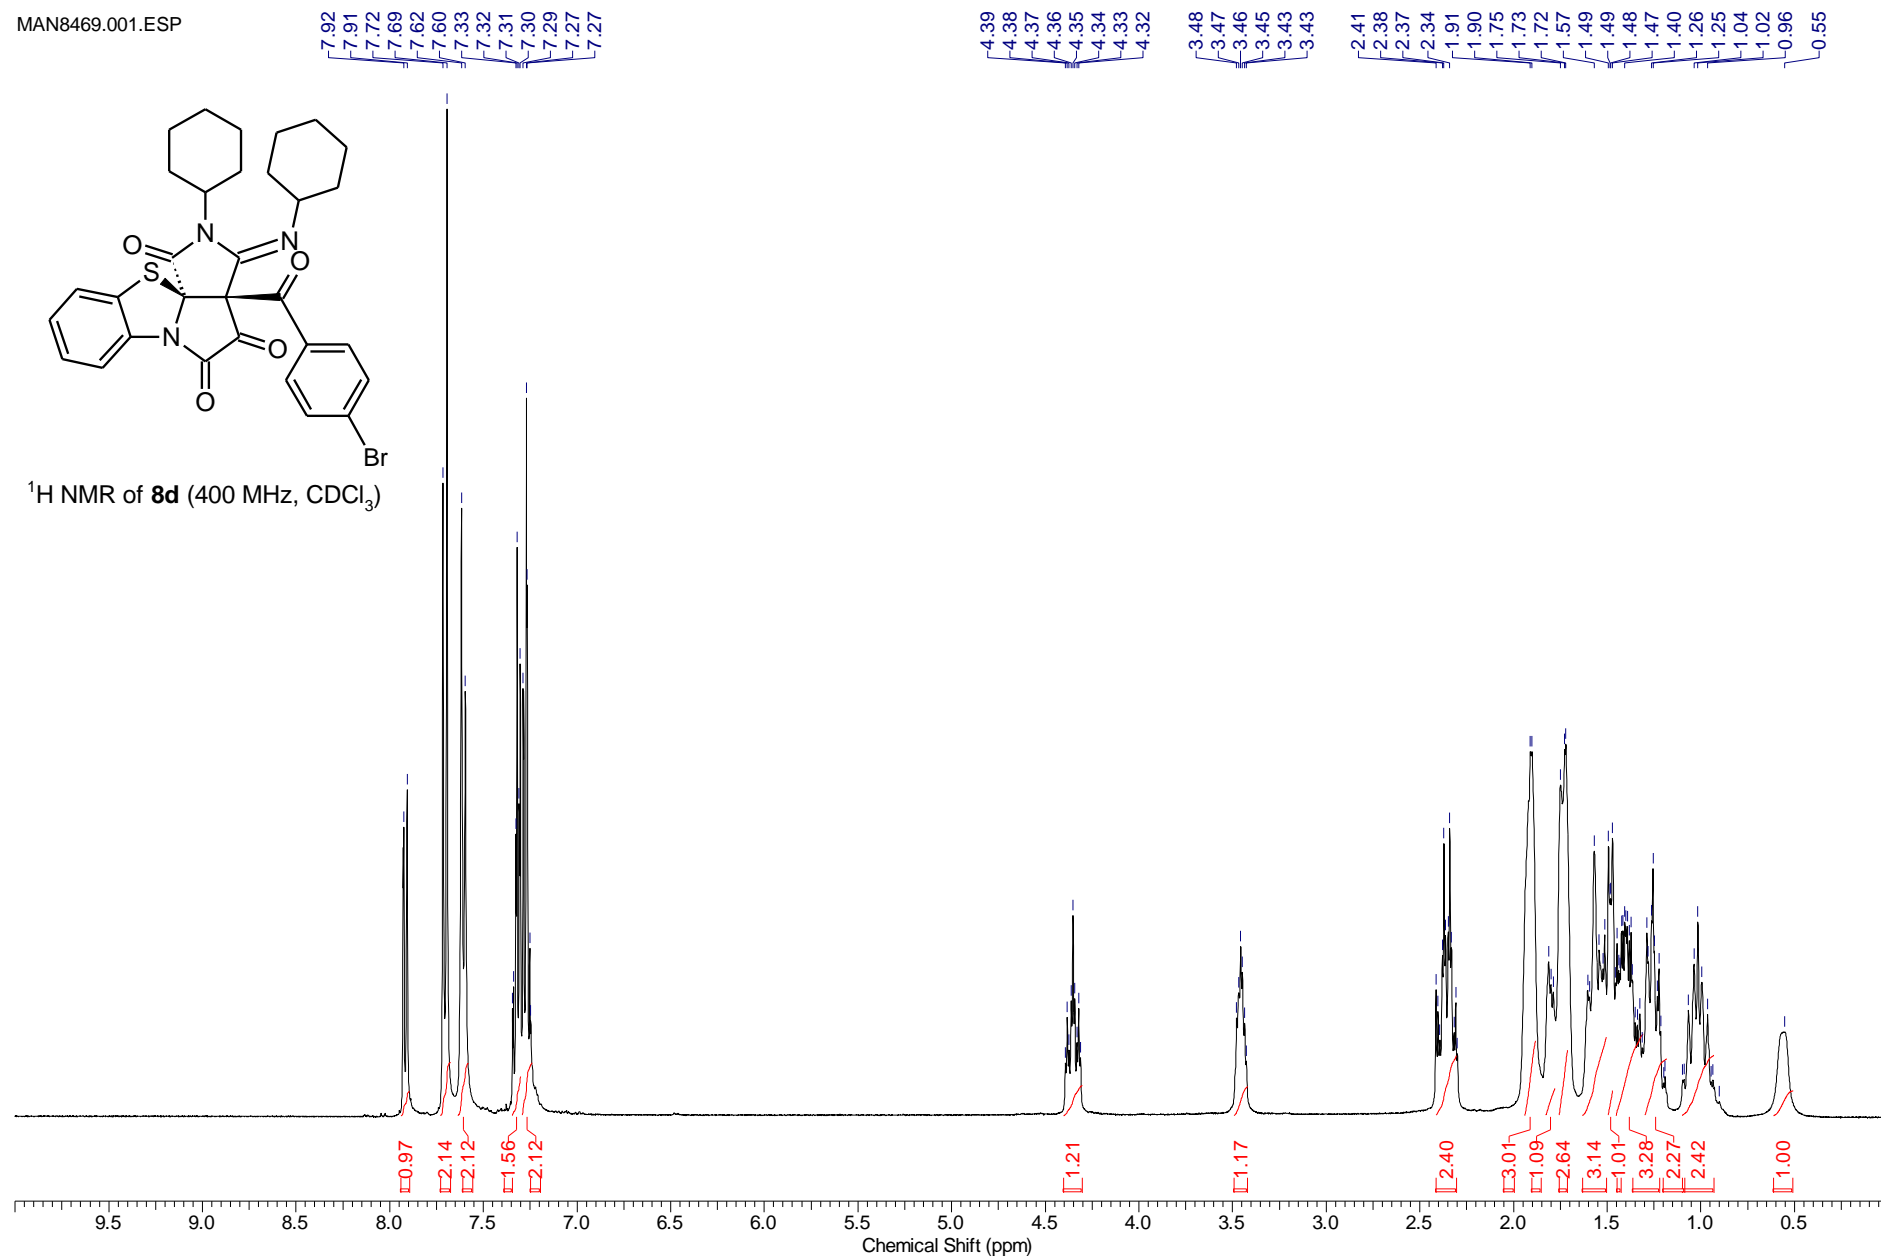

MAN8469.002.ES

189.88  
187.33

167.85

153.90

141.31

134.72

132.50

130.71

129.97

129.04

128.57

126.96

122.61

118.06

77.42

77.30

76.98

76.66

65.24

60.54

54.07

34.08

32.29

28.24

27.76

25.84

25.79

25.60

25.12

23.92

23.76

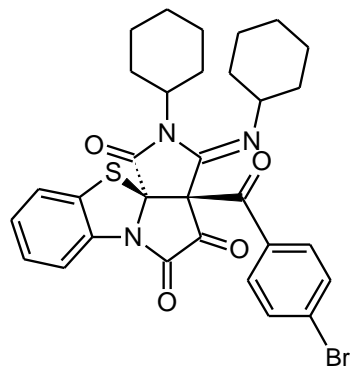

$^{13}\text{C}$  NMR of **8d** (100 MHz,  $\text{CDCl}_3$ )

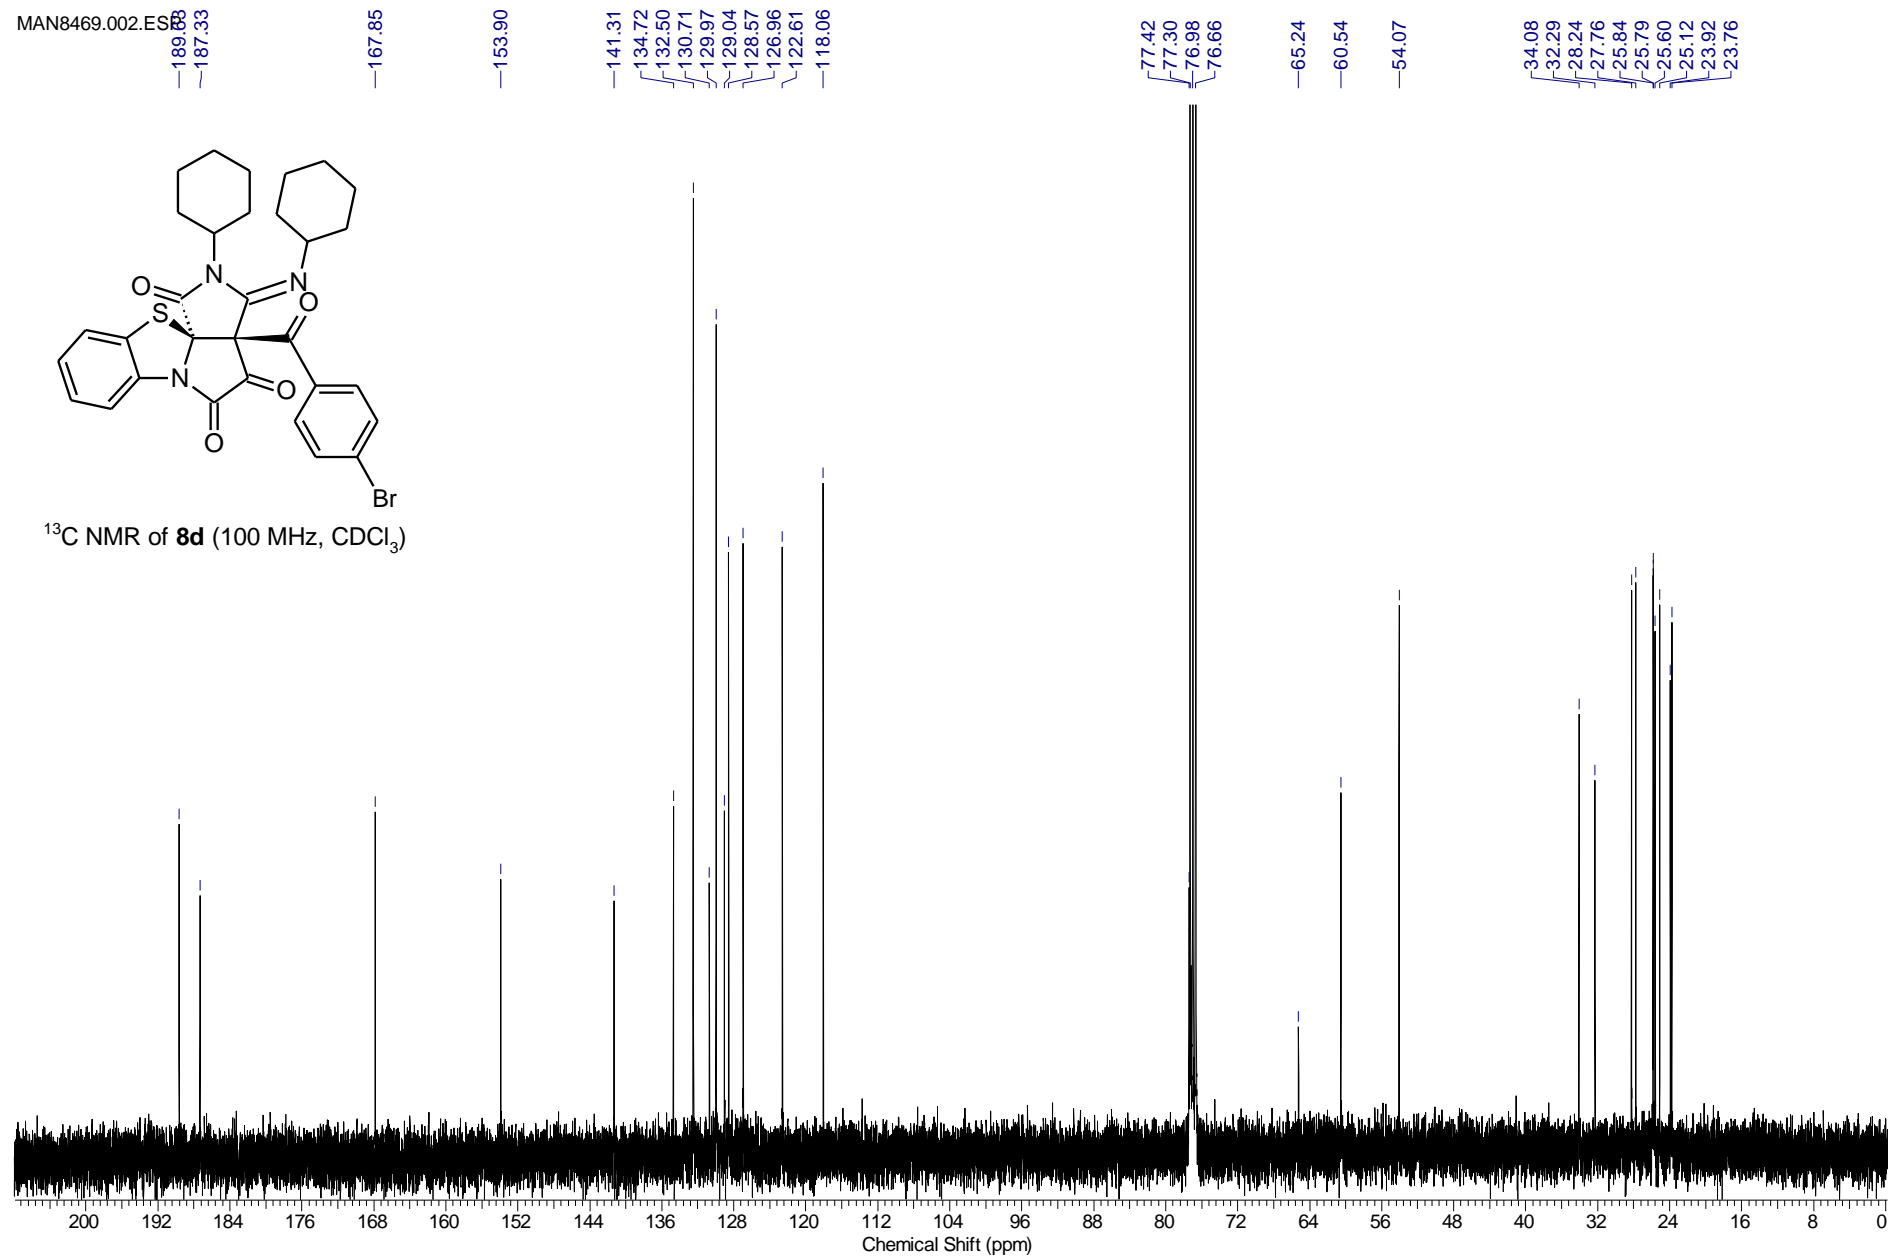

MAN8469.003.ESP

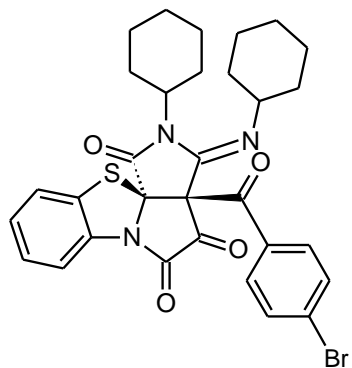

DEPT135 of **8d** (100 MHz, CDCl<sub>3</sub>)

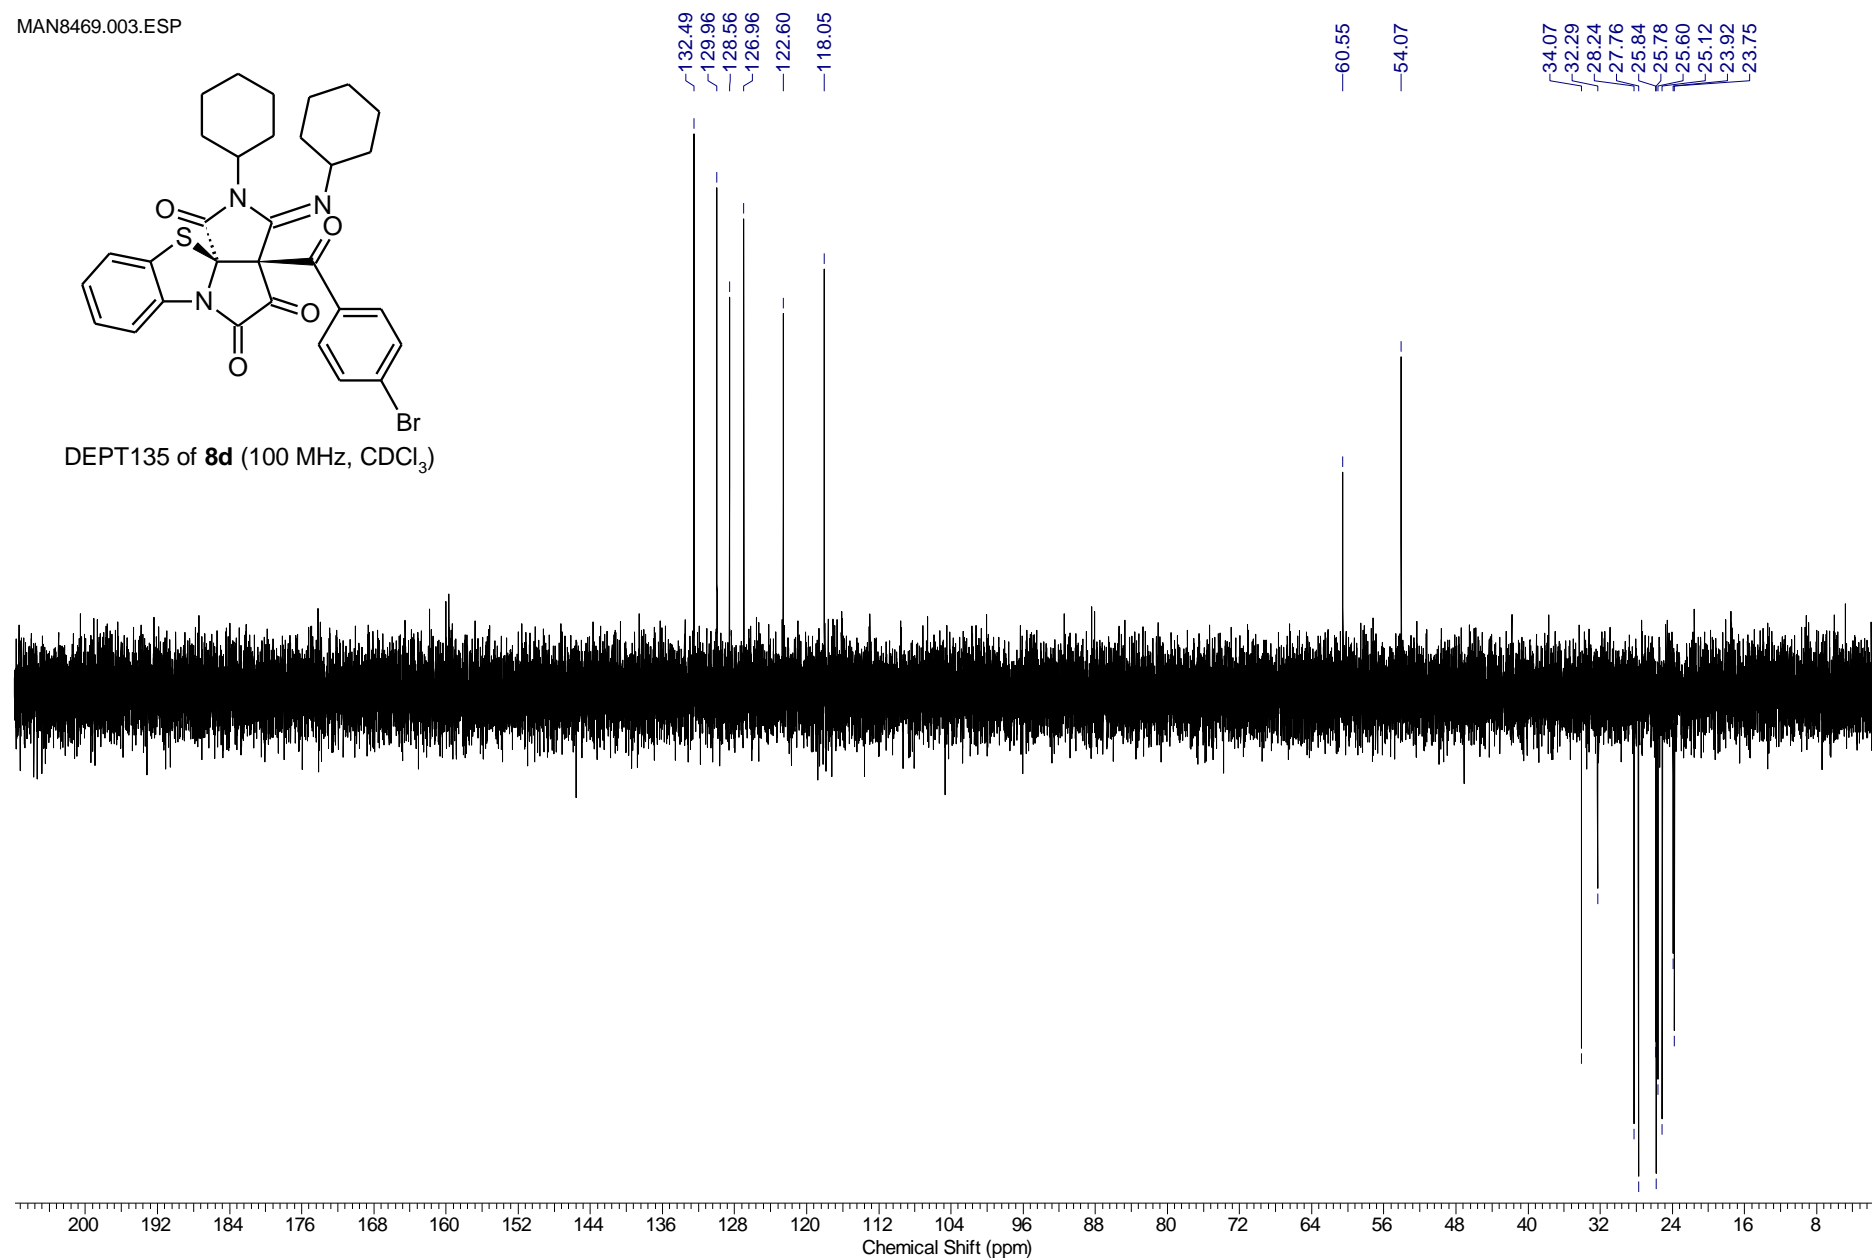

MAN8470.001.ESP

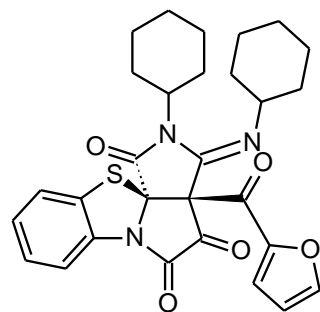

$^1\text{H}$  NMR of **8e** (400 MHz,  $\text{CDCl}_3$ )

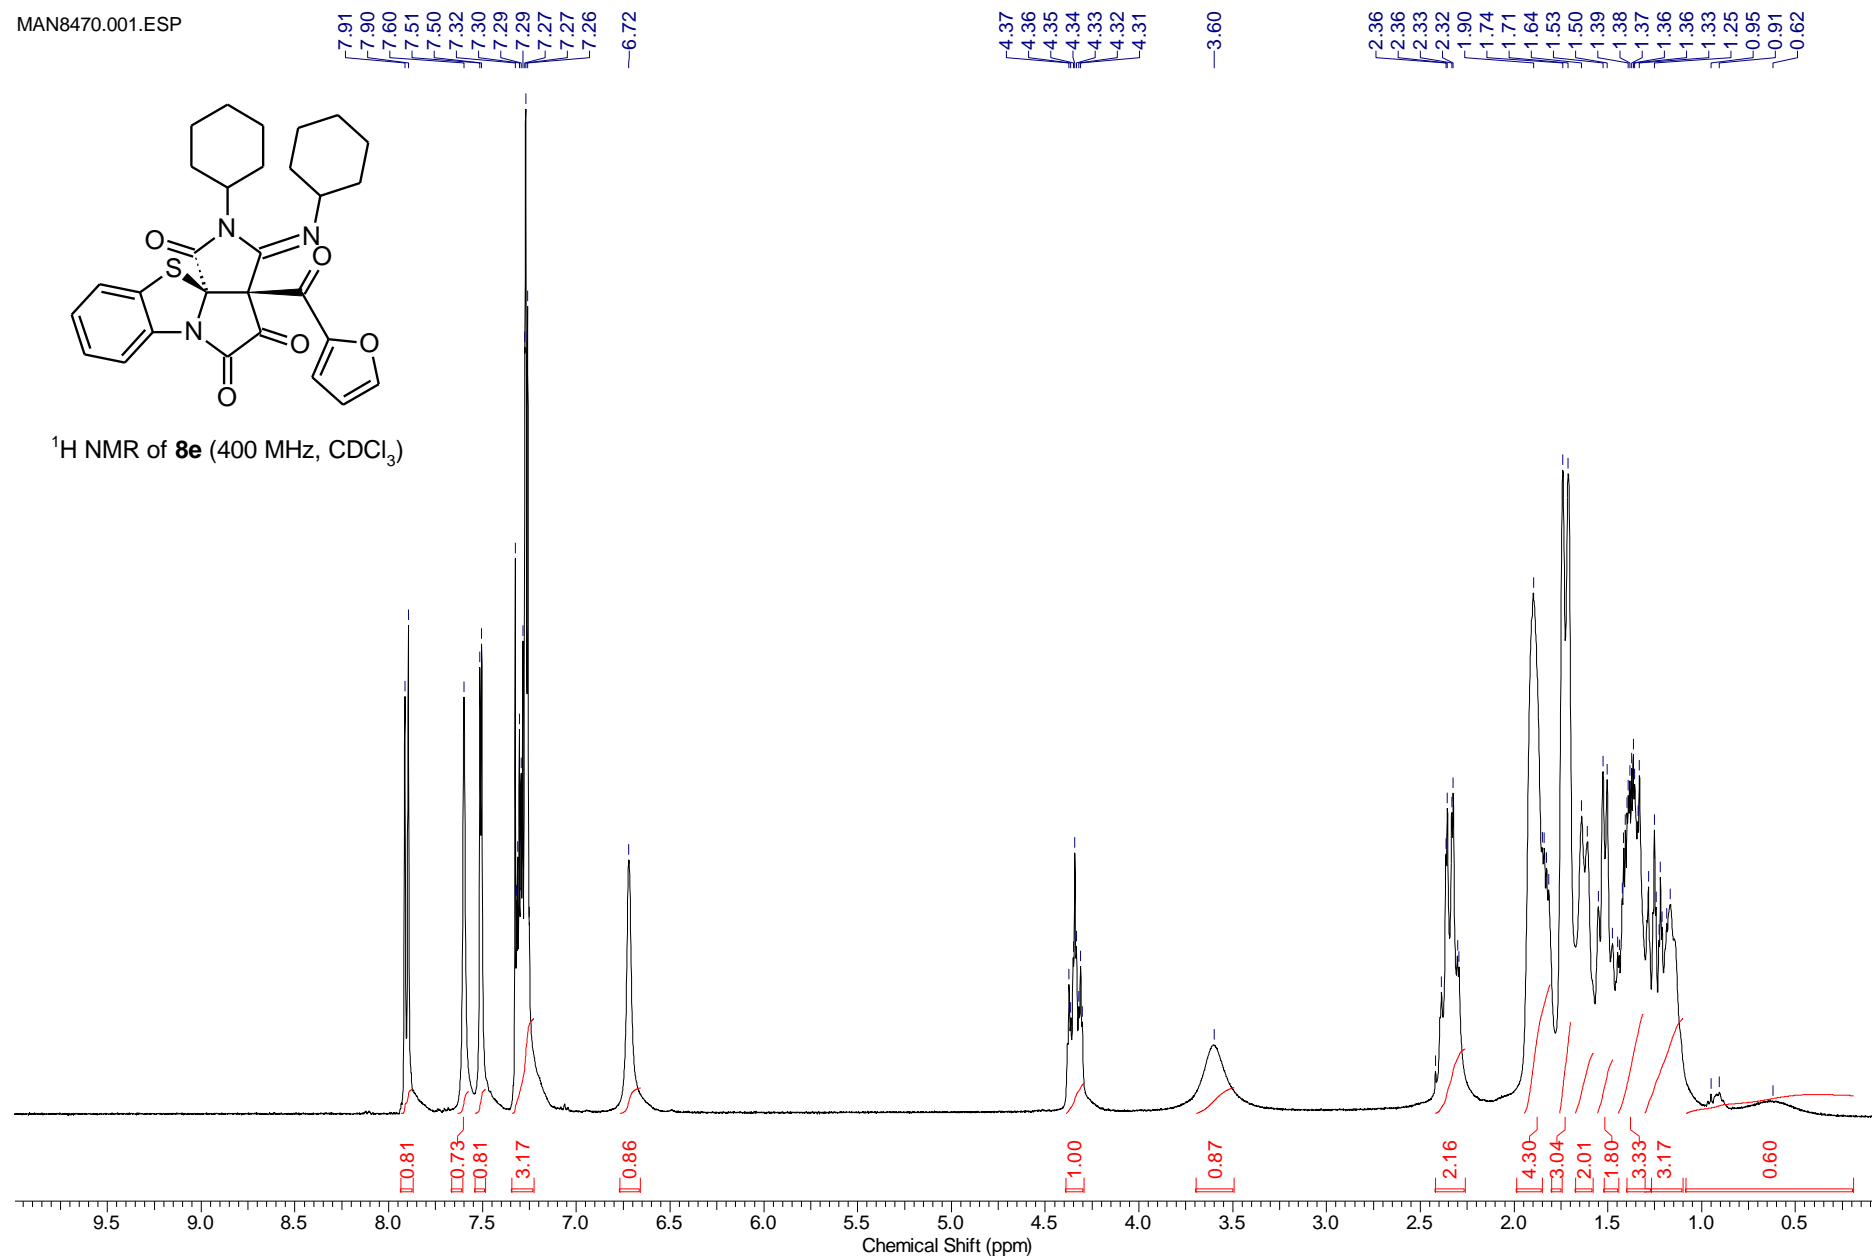

MAN8470.002.ESP

—186.63

—168.16

—149.39

—140.45

—134.91

—129.27

—128.37

—126.67

—122.55

—120.85

—118.04

—114.21

77.77

77.32

77.20

77.00

76.68

—54.08

34.02

28.34

27.78

25.91

25.85

25.74

25.22

23.96

23.79

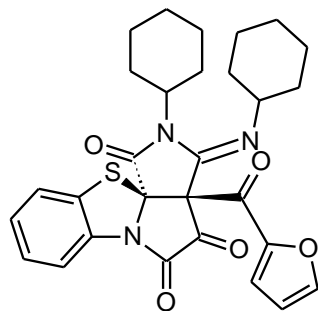

$^{13}\text{C}$  NMR of **8e** (100 MHz,  $\text{CDCl}_3$ )

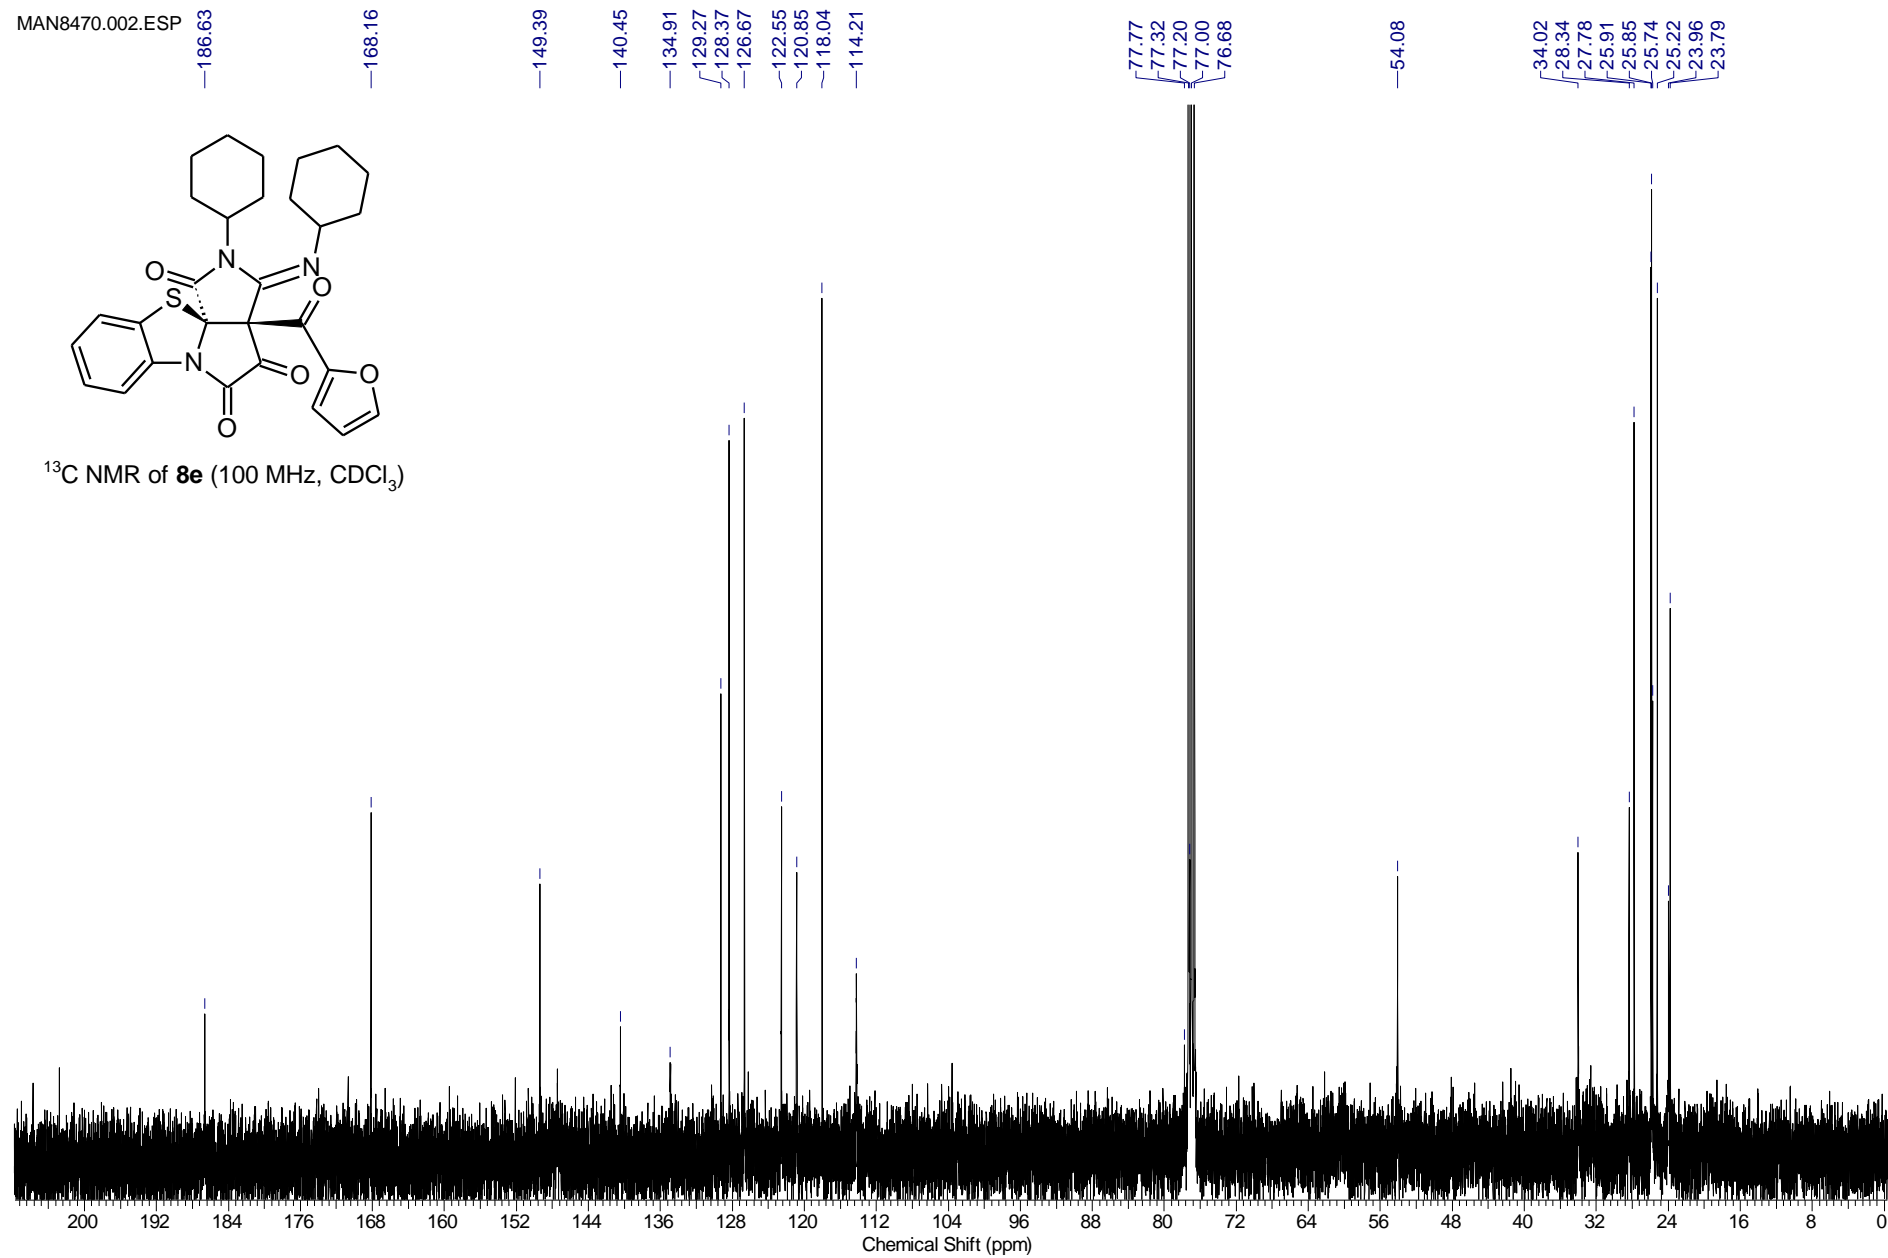

MAN8470.003.ESP

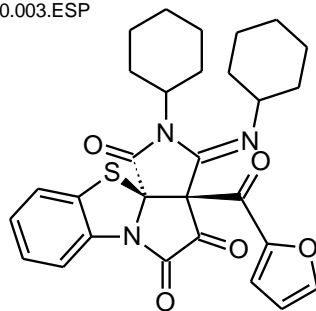

DEPT135 of **8e** (100 MHz, CDCl<sub>3</sub>)

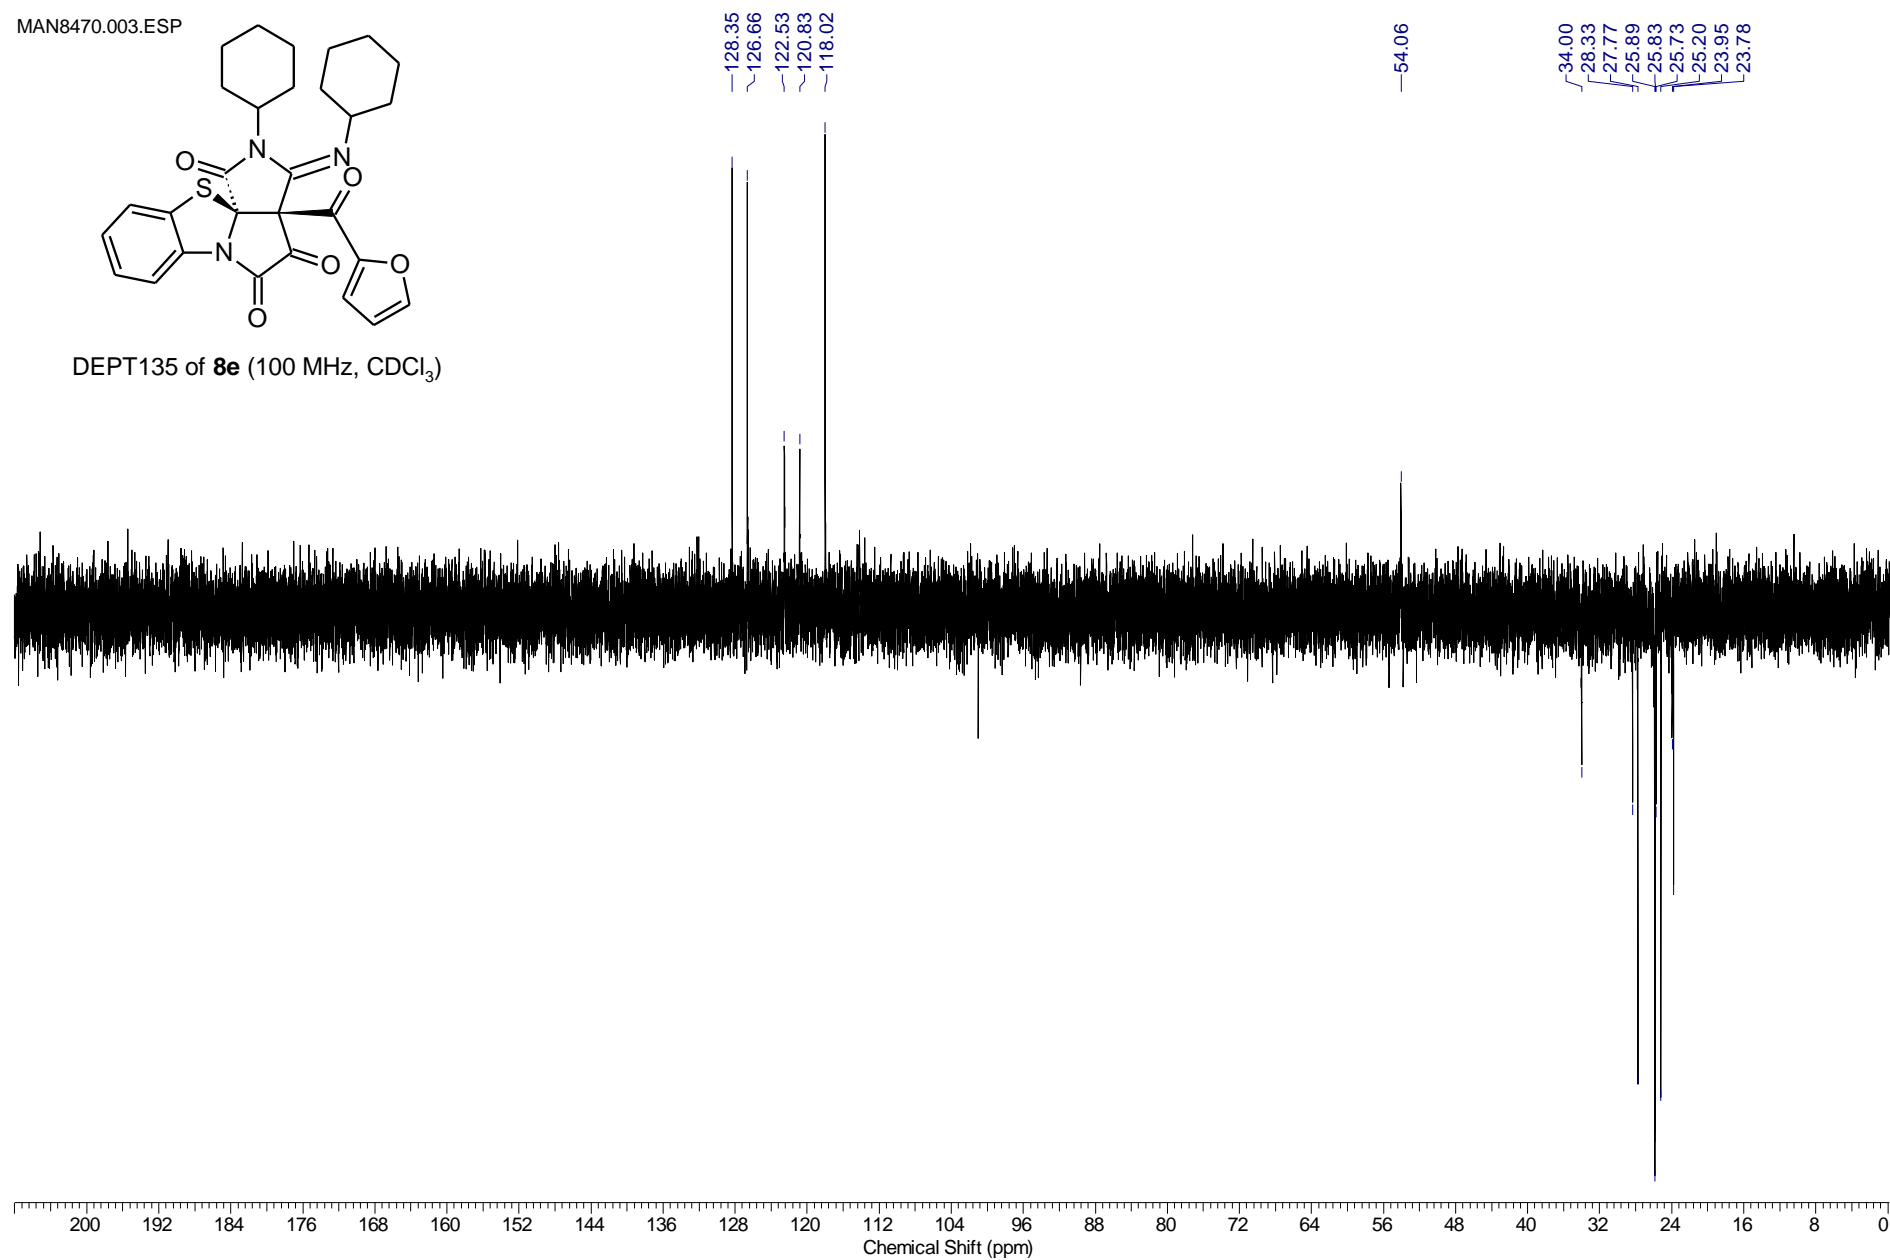



MAN8471.001.ESP

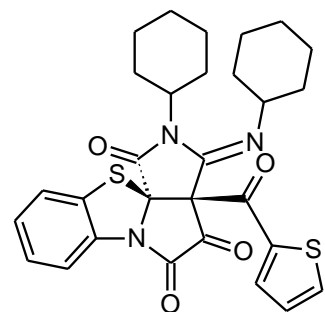

$^1\text{H}$  NMR of **8f** (400 MHz,  $\text{CDCl}_3$ )

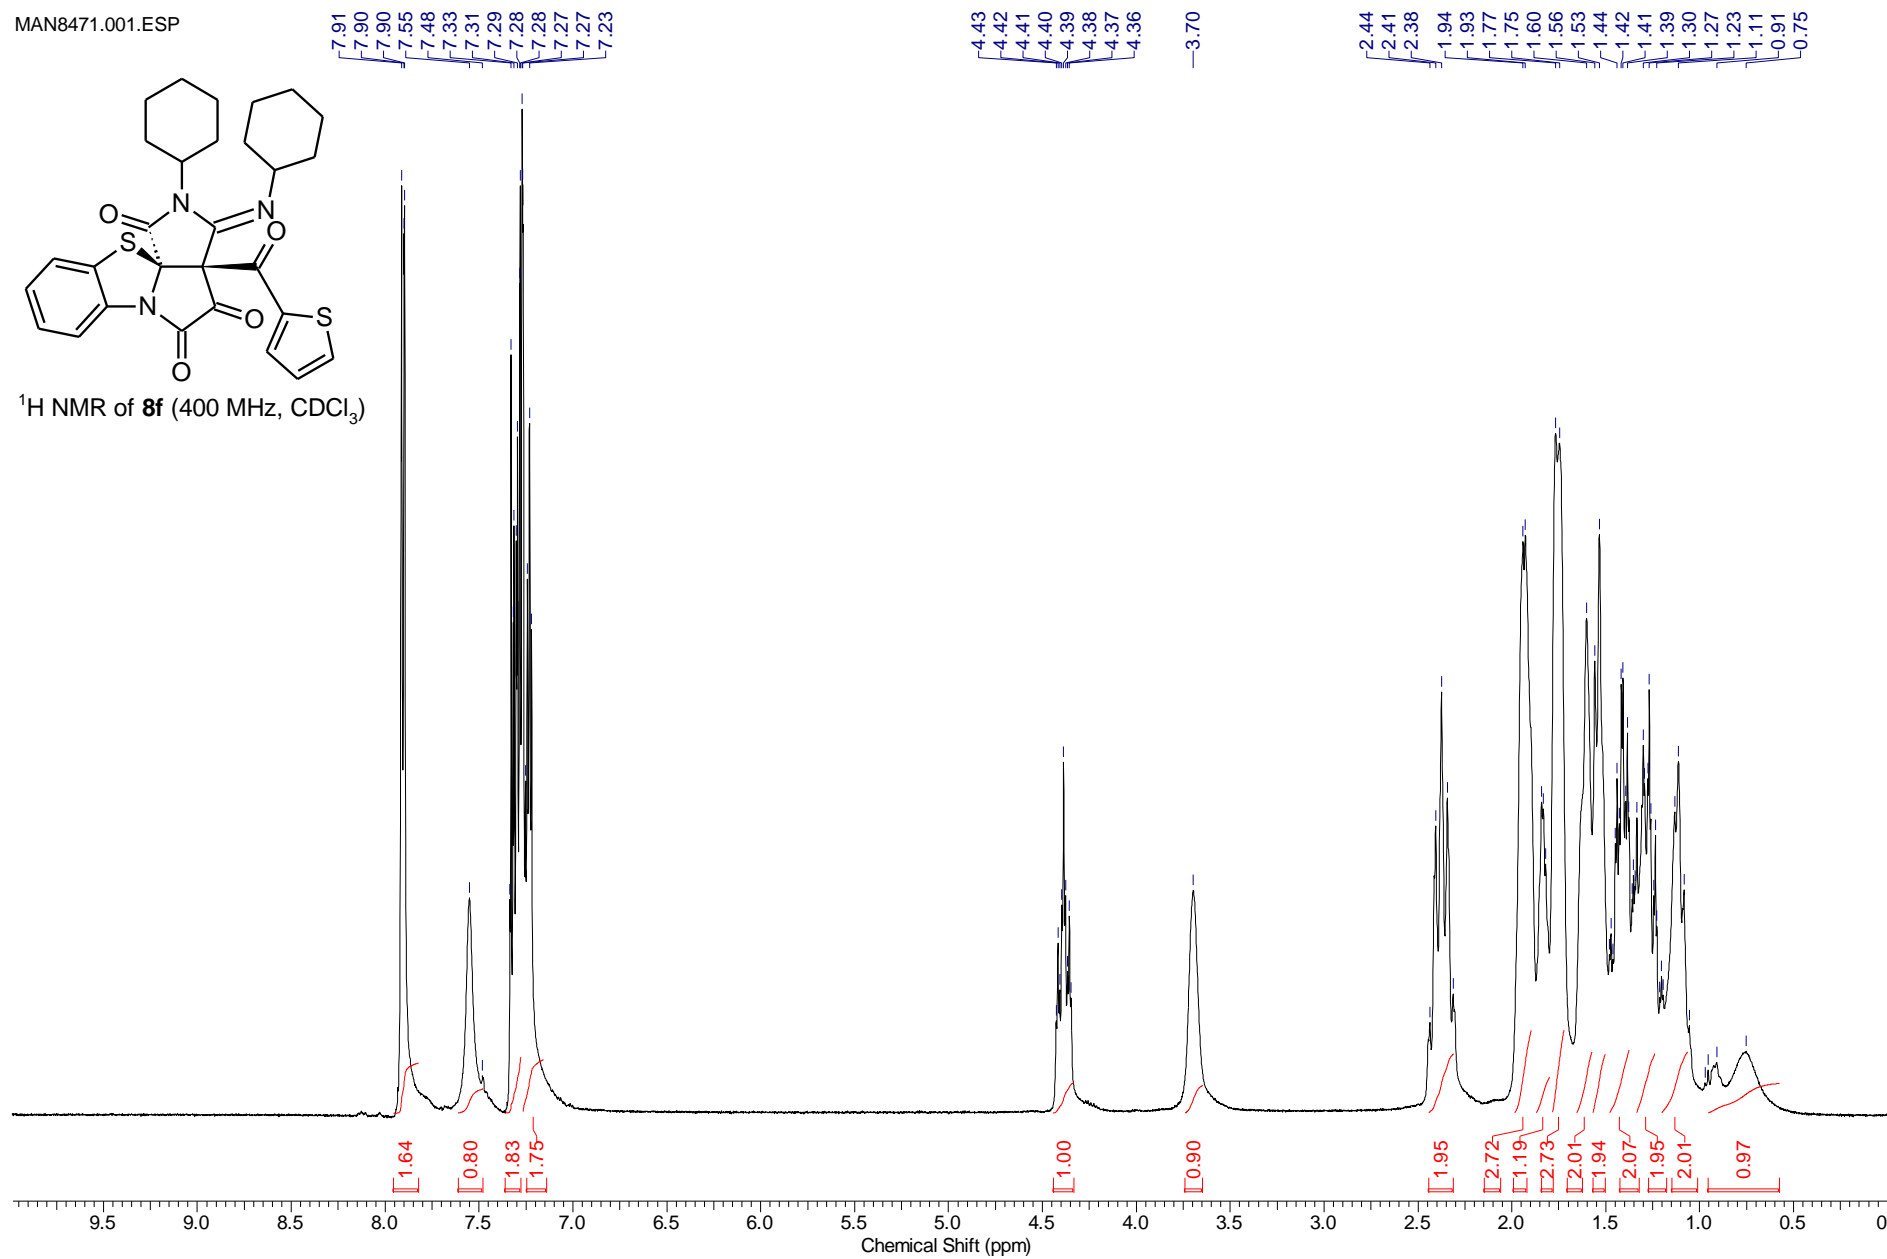

MAN8471.002.ESP

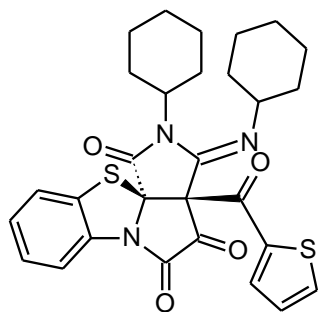

$^{13}\text{C}$  NMR of **8f** (100 MHz,  $\text{CDCl}_3$ )

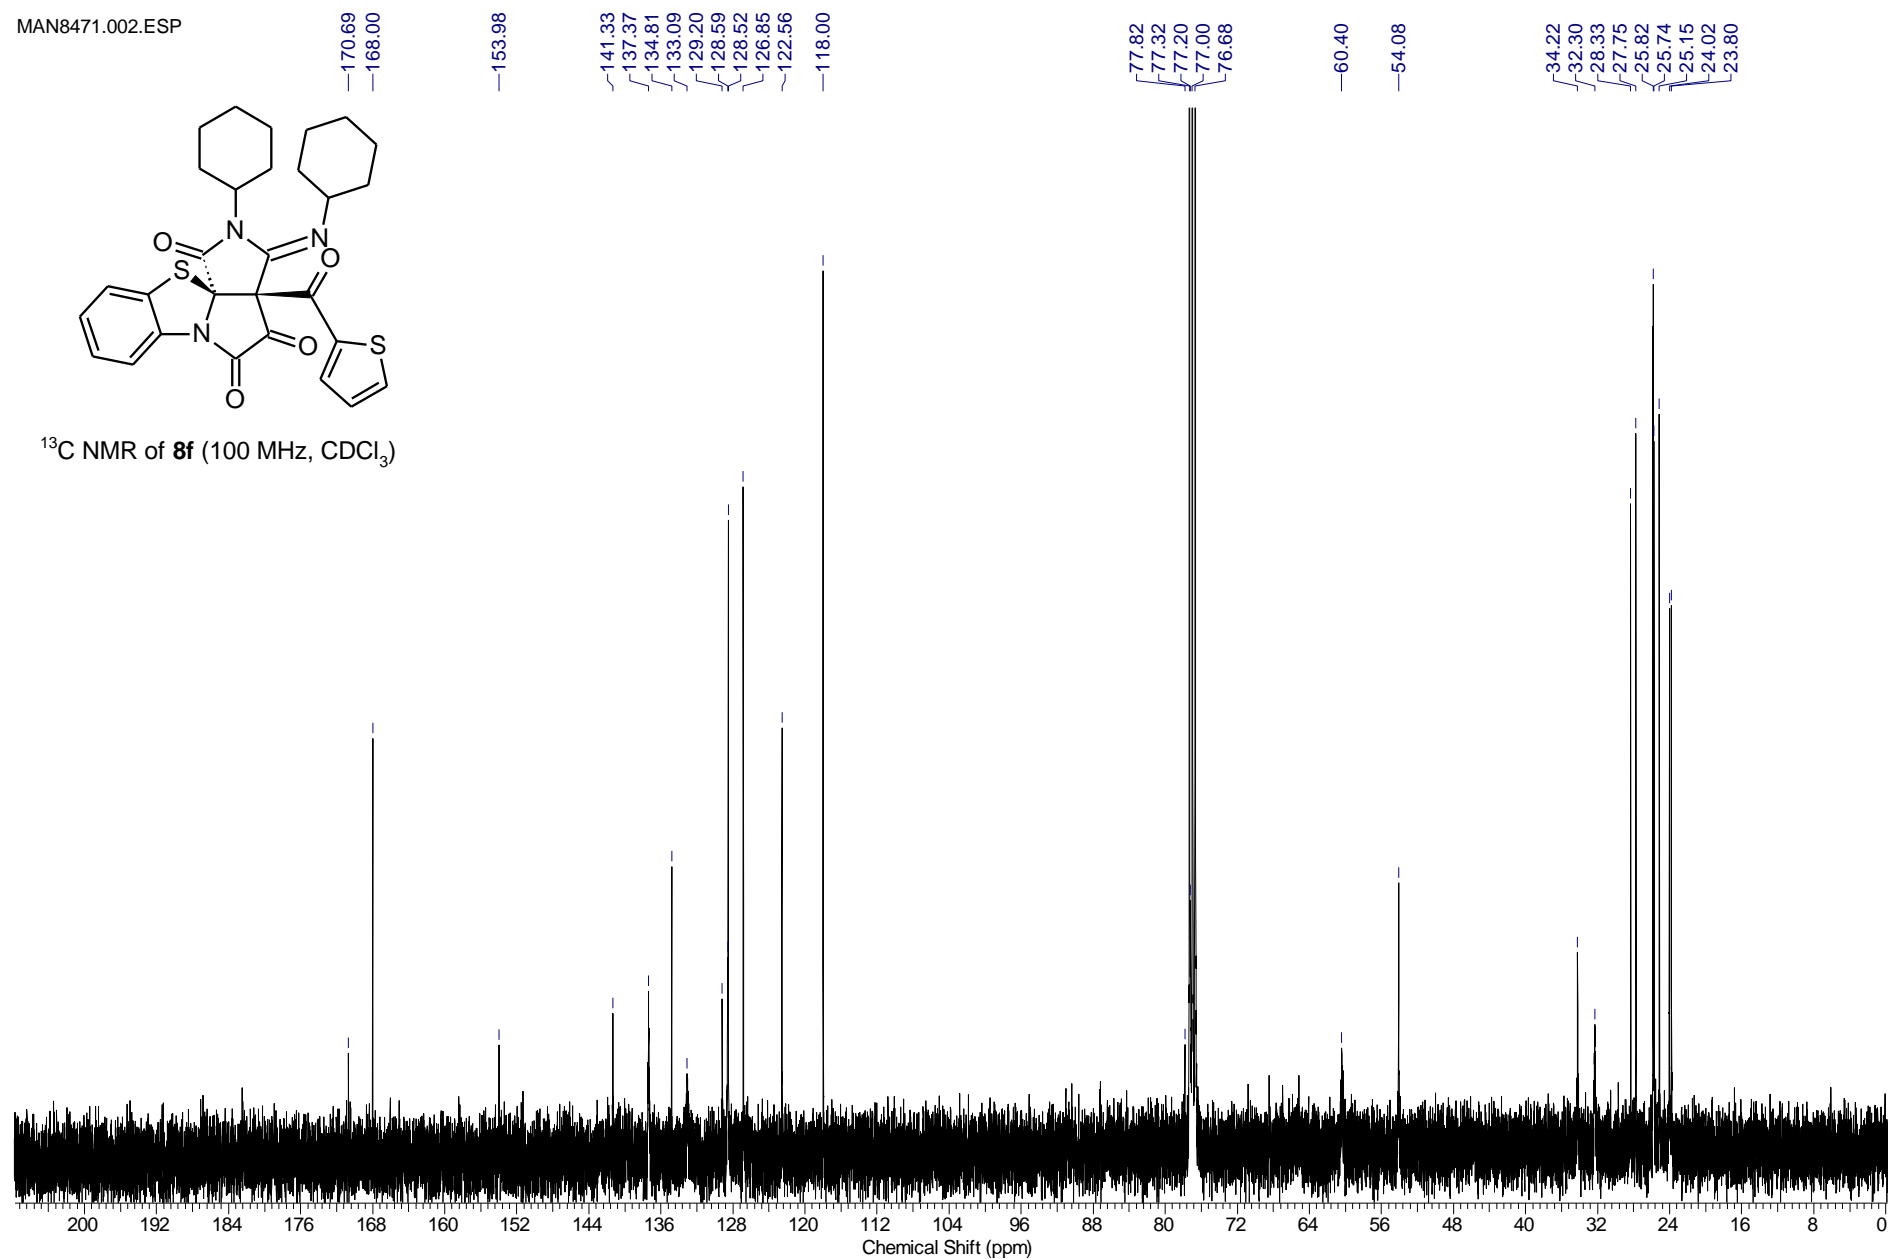

MAN8471.003.ESP

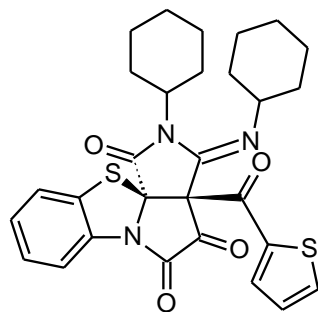

DEPT135 of **8f** (100 MHz, CDCl<sub>3</sub>)

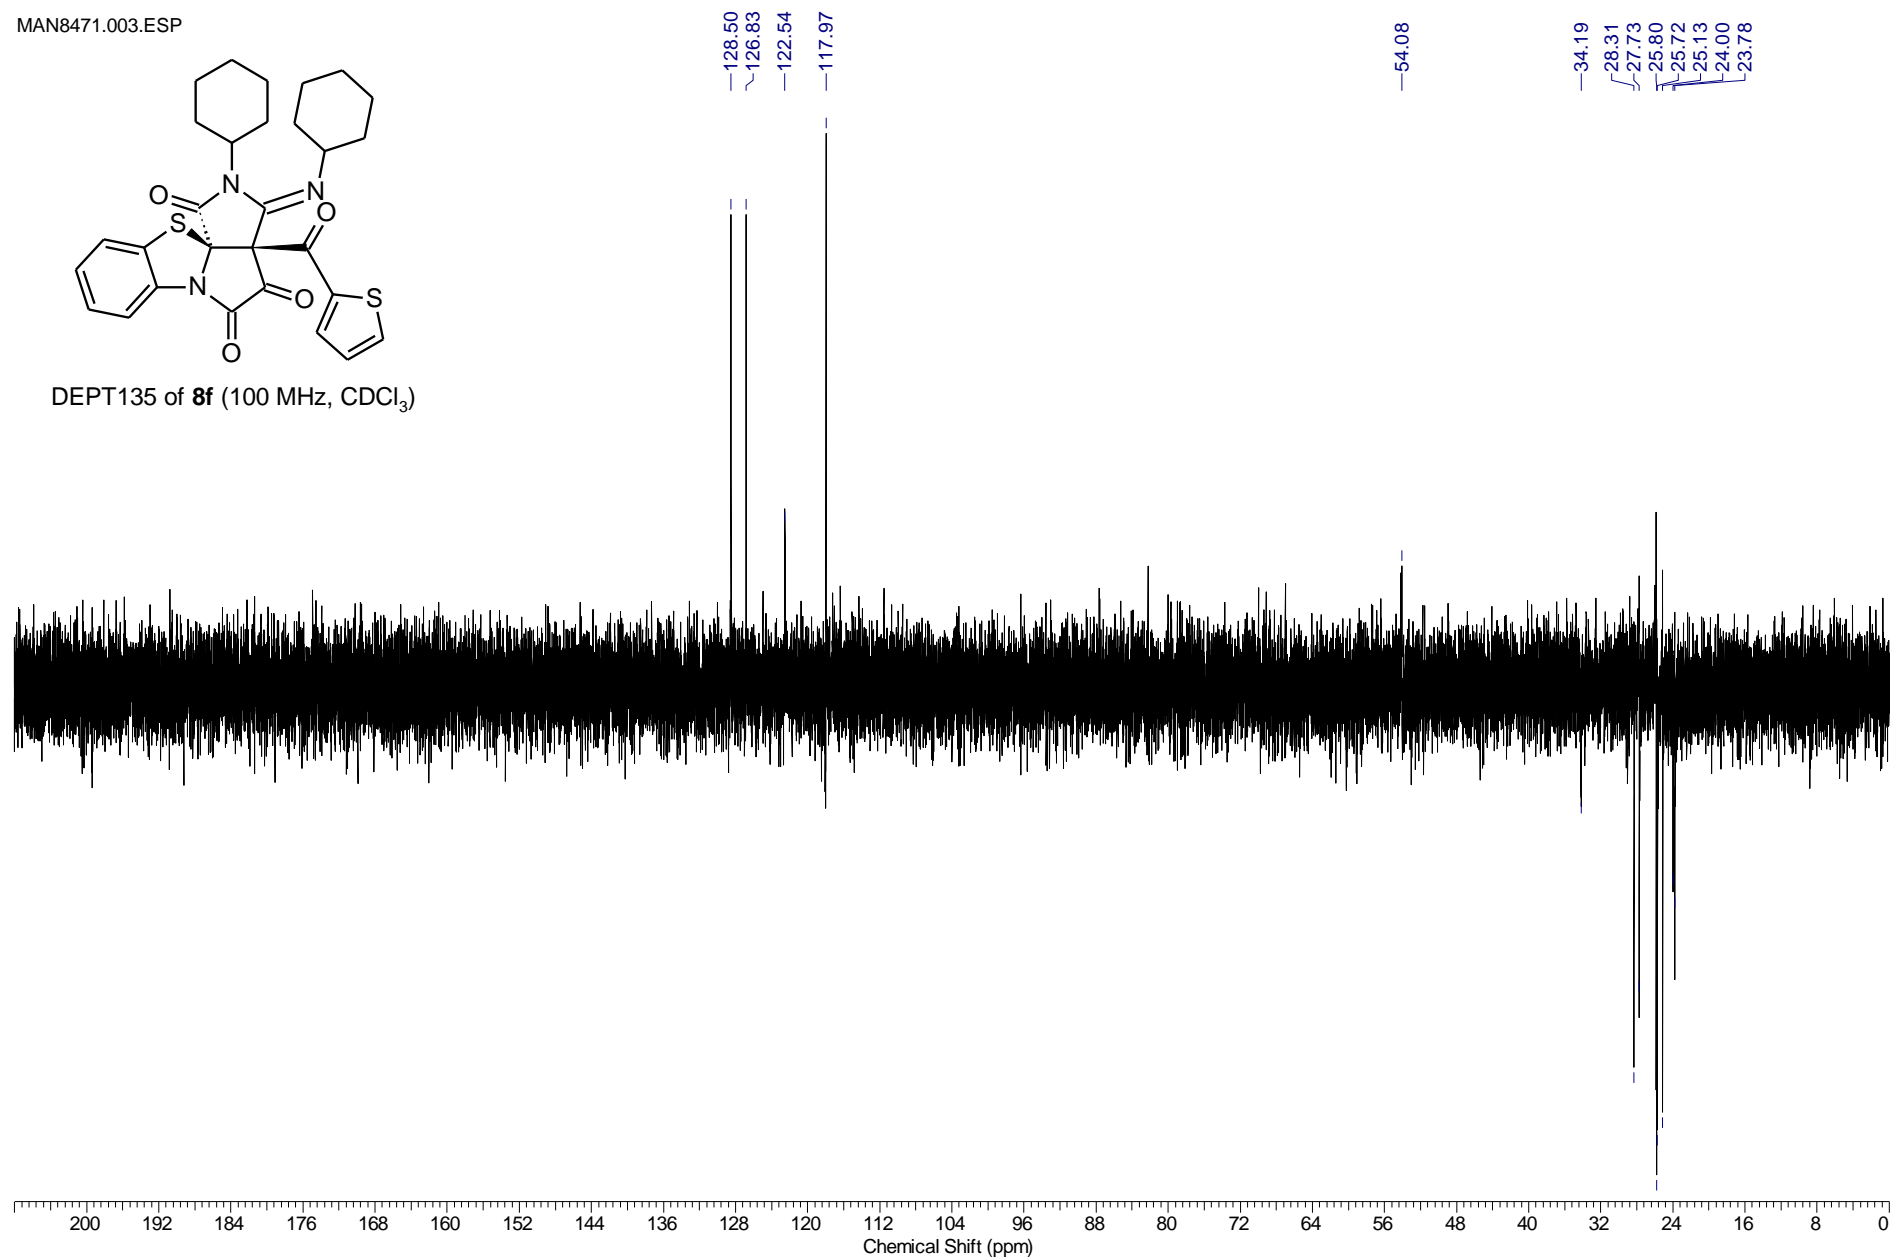

MAN7187.001.ESP

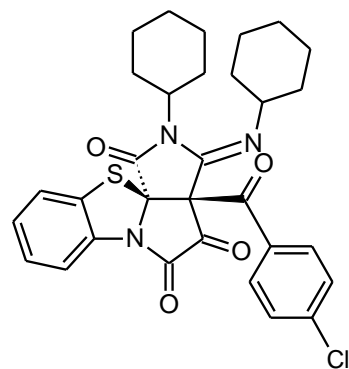

$^1\text{H}$  NMR of **8g** (400 MHz,  $\text{CDCl}_3$ )

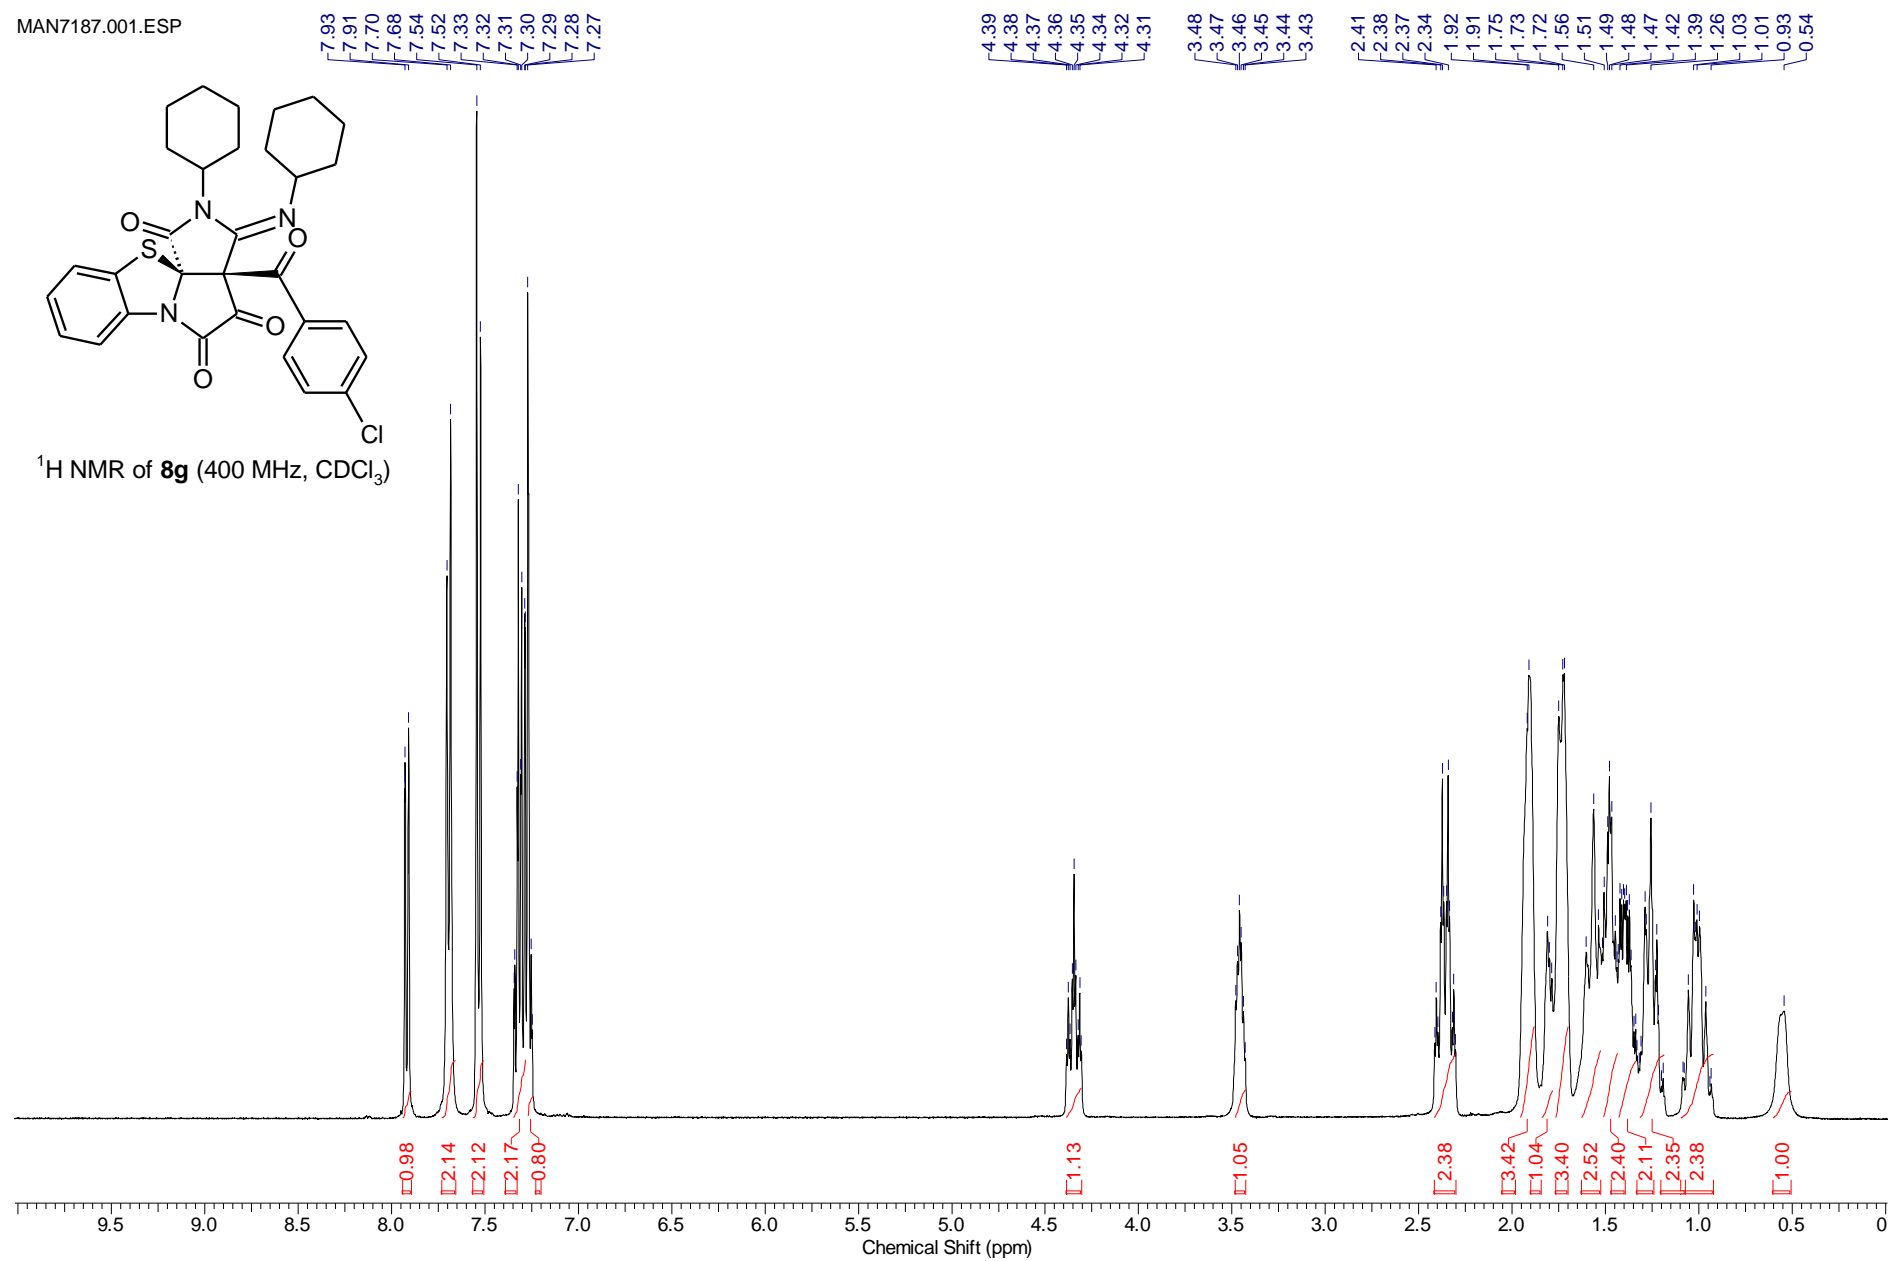

MAN7187.002.ES.74

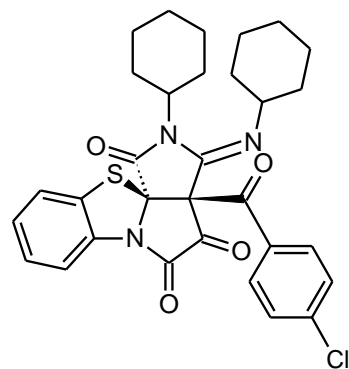

$^{13}\text{C}$  NMR of **8g** (100 MHz,  $\text{CDCl}_3$ )

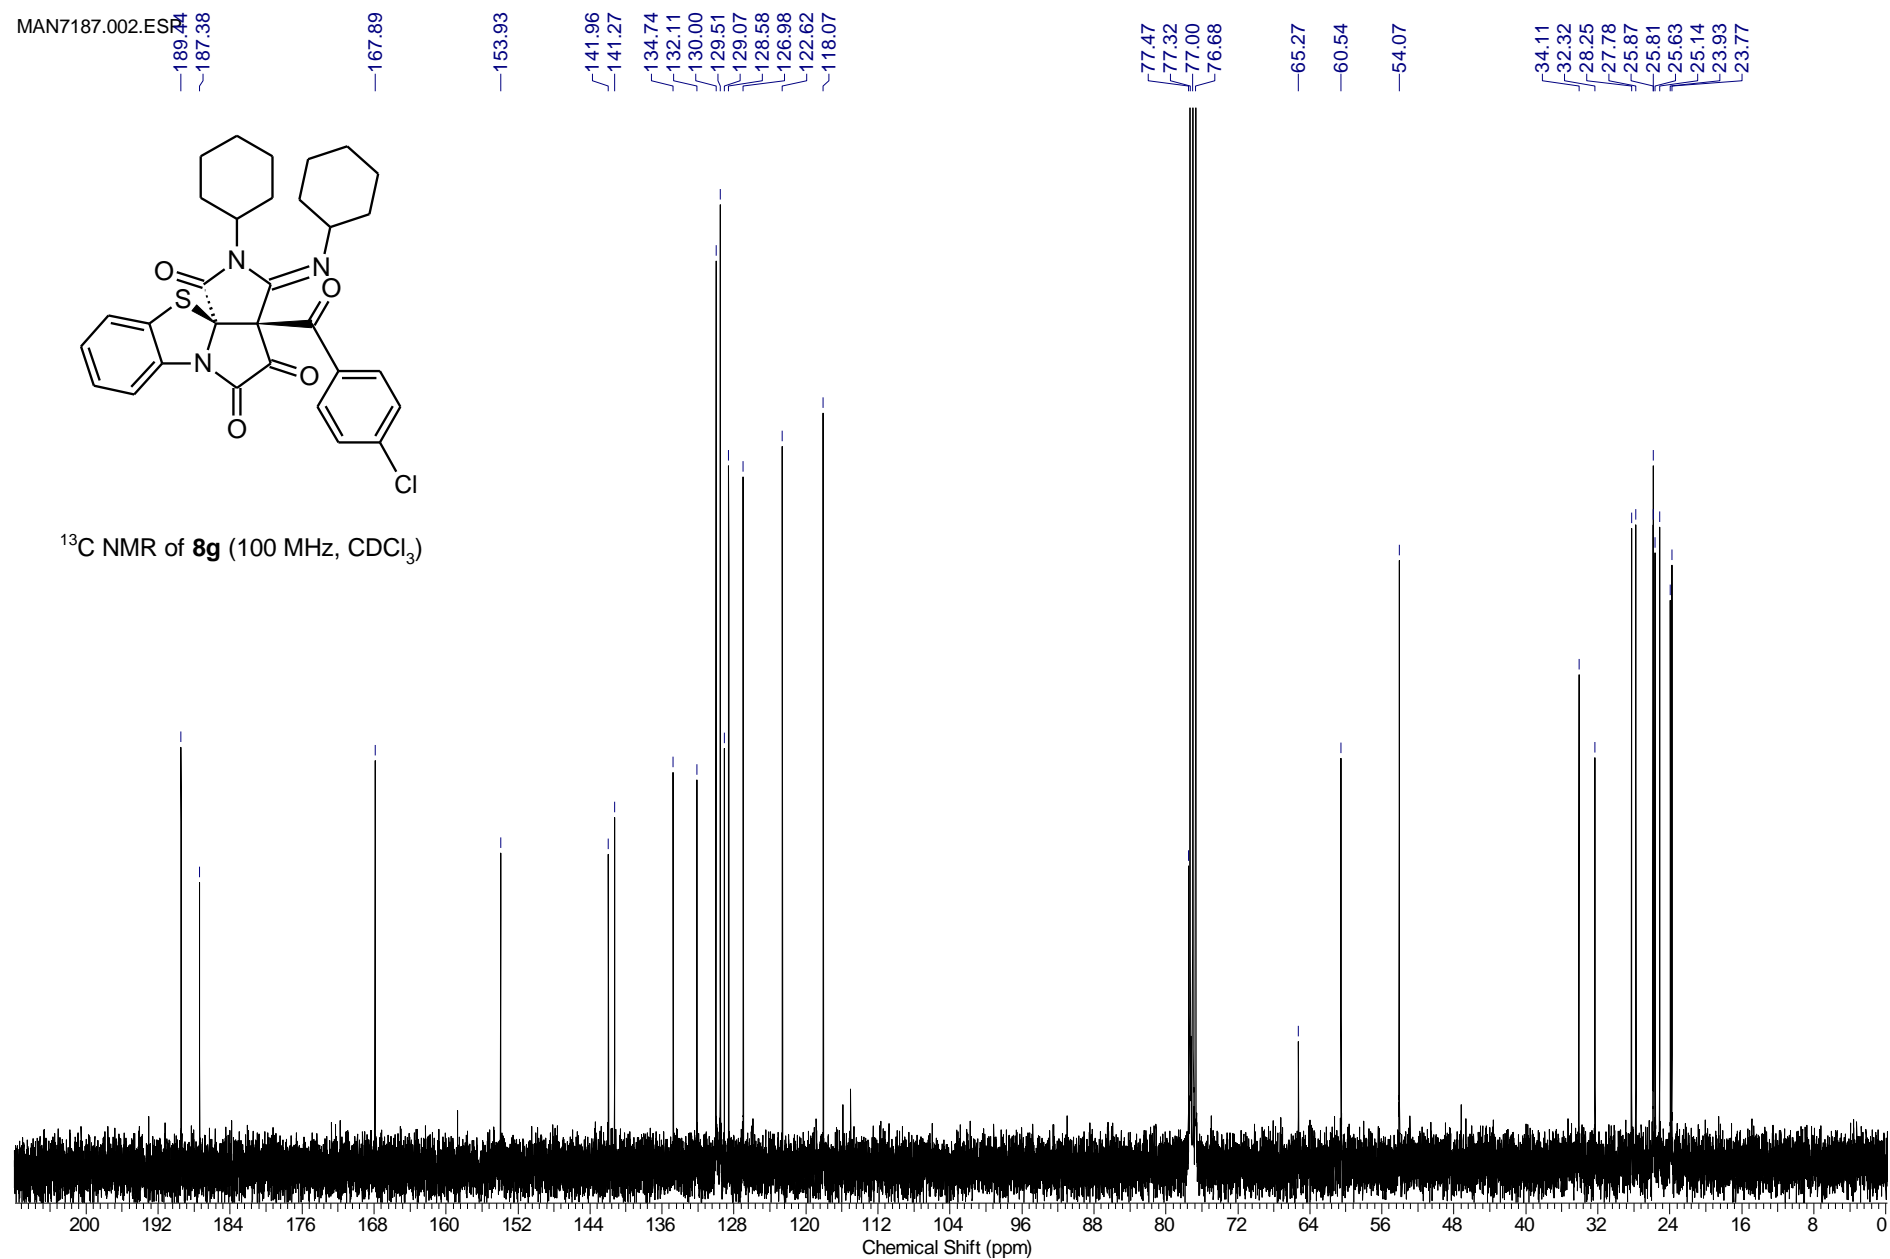

MAN7187.002.ES.74



$^{13}\text{C}$  NMR of **8g** (100 MHz,  $\text{CDCl}_3$ )

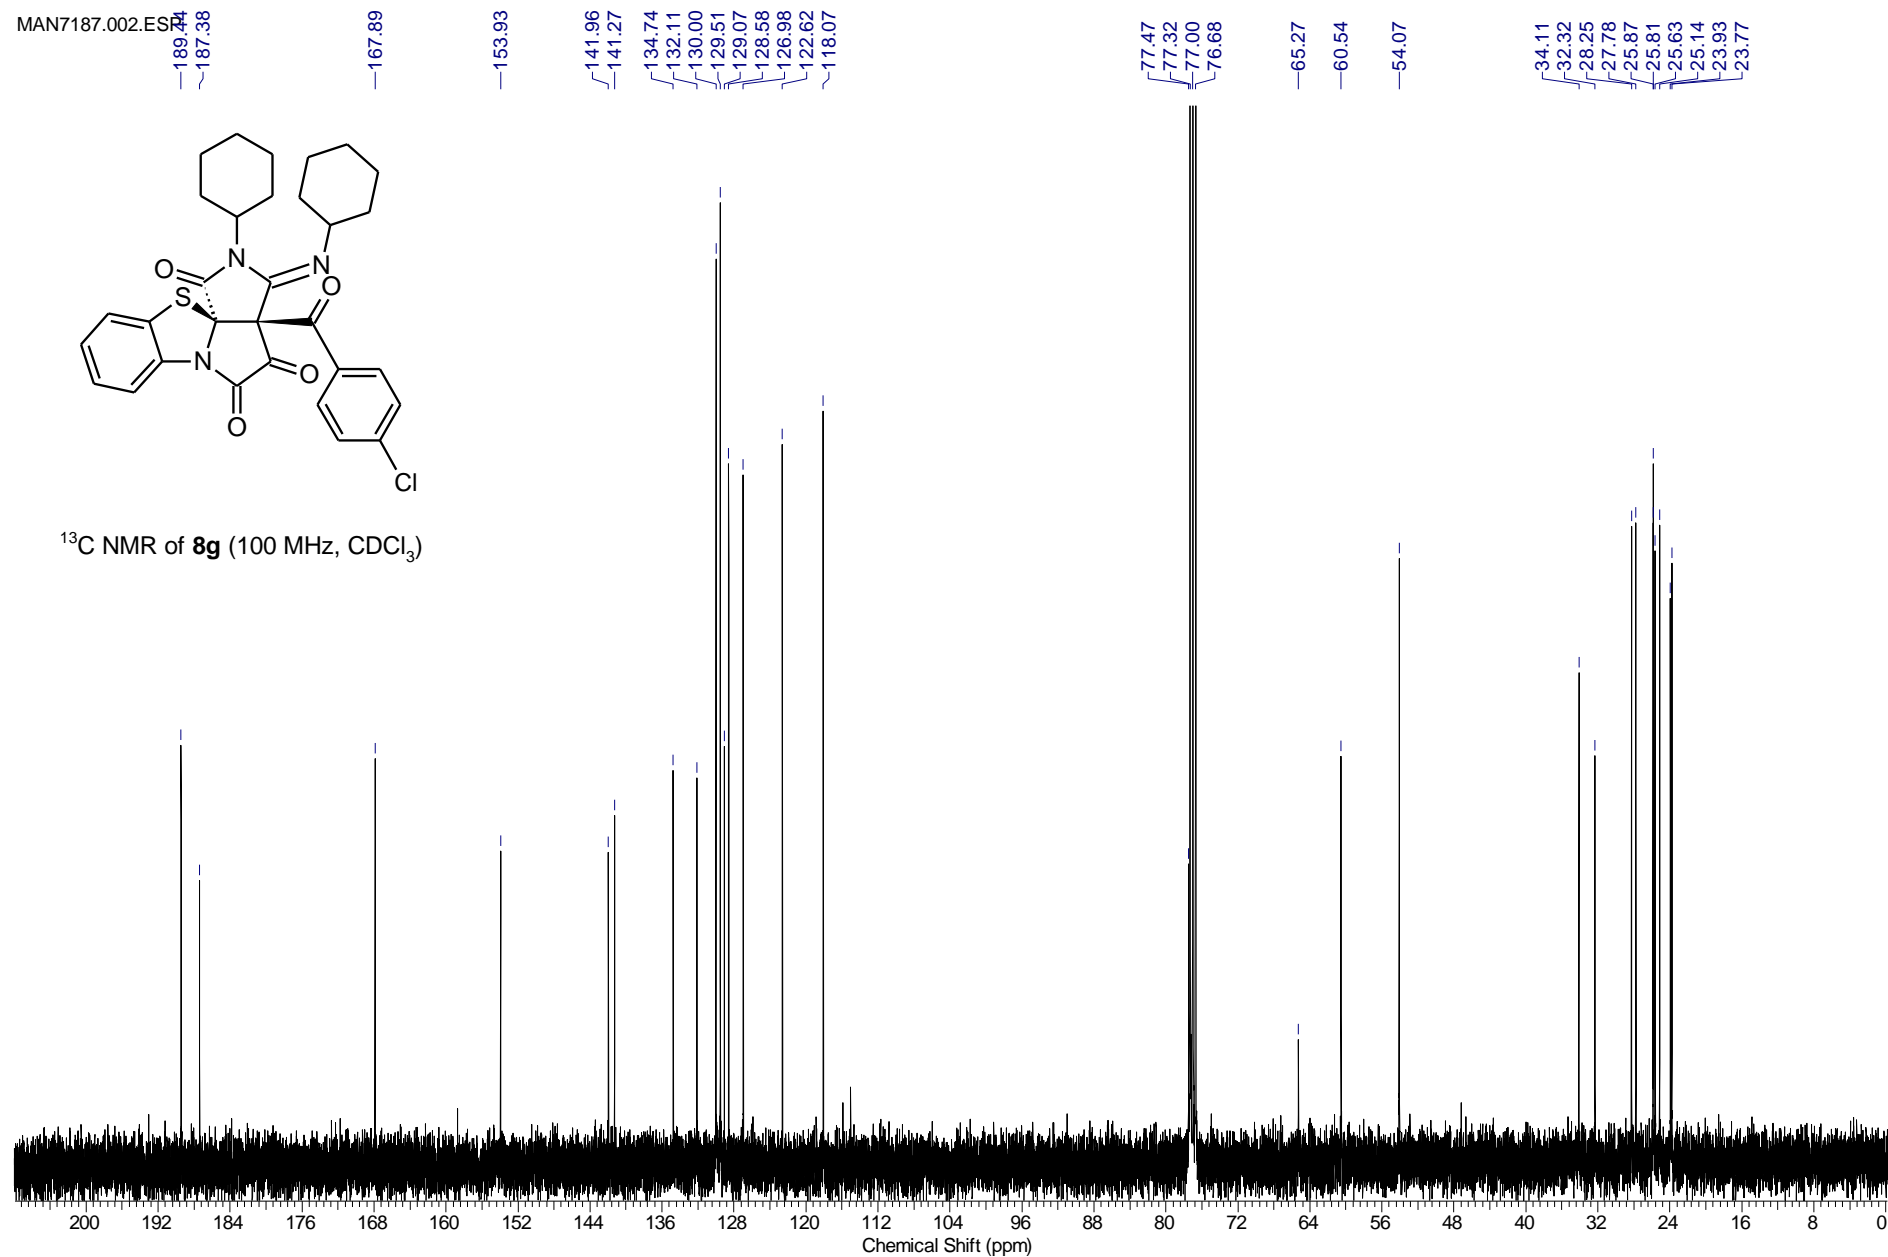

MAN7187.003.ESP

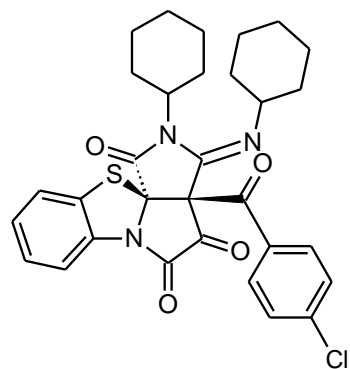

DEPT135 of **8g** (100 MHz, CDCl<sub>3</sub>)

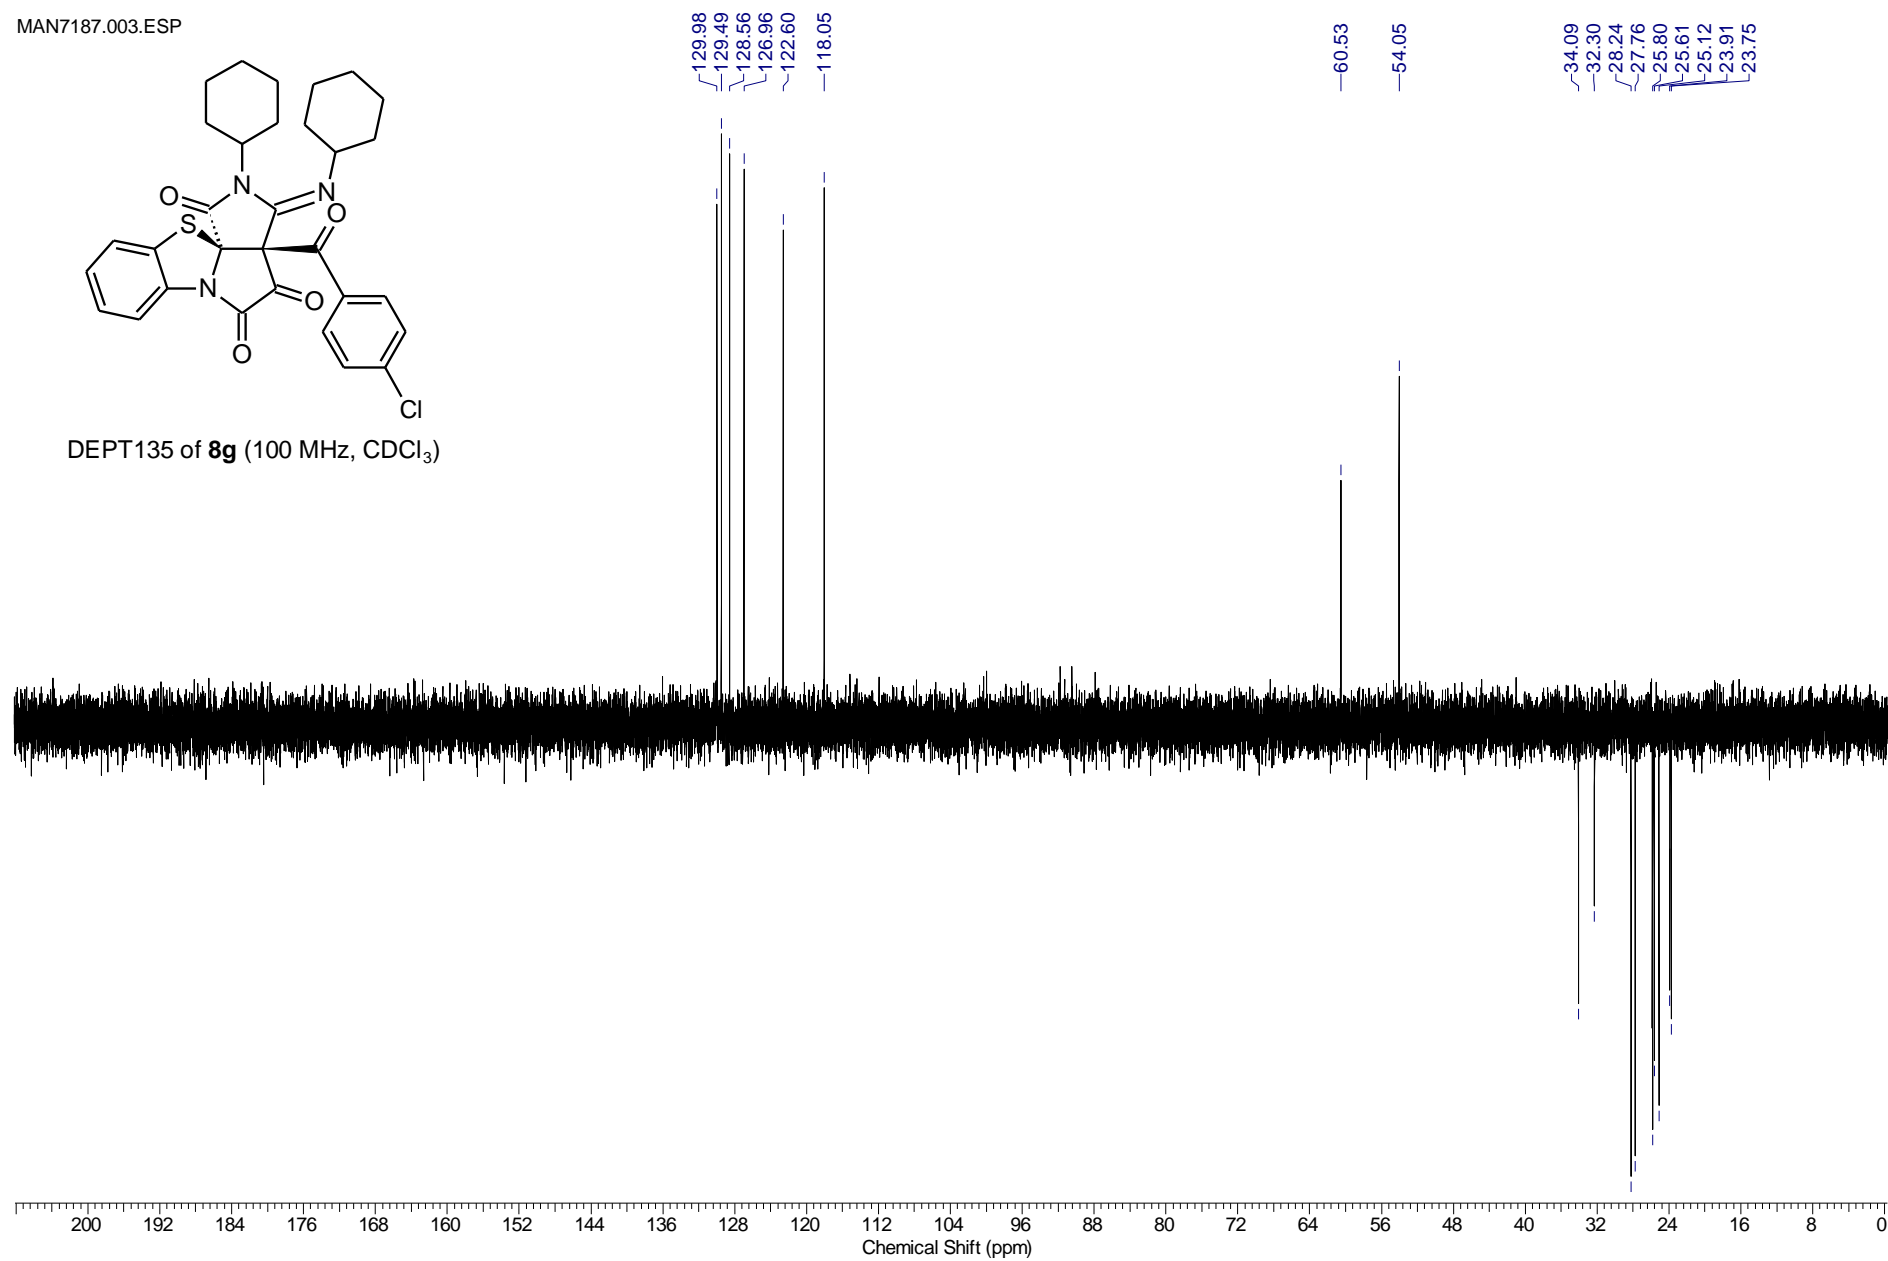

MAN7142.001.ESP

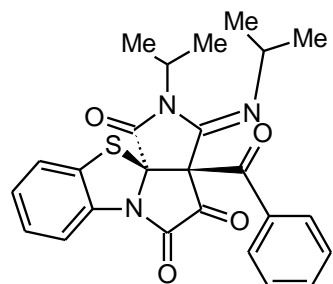

$^1\text{H}$  NMR of **8h** (400 MHz,  $\text{CDCl}_3$ )

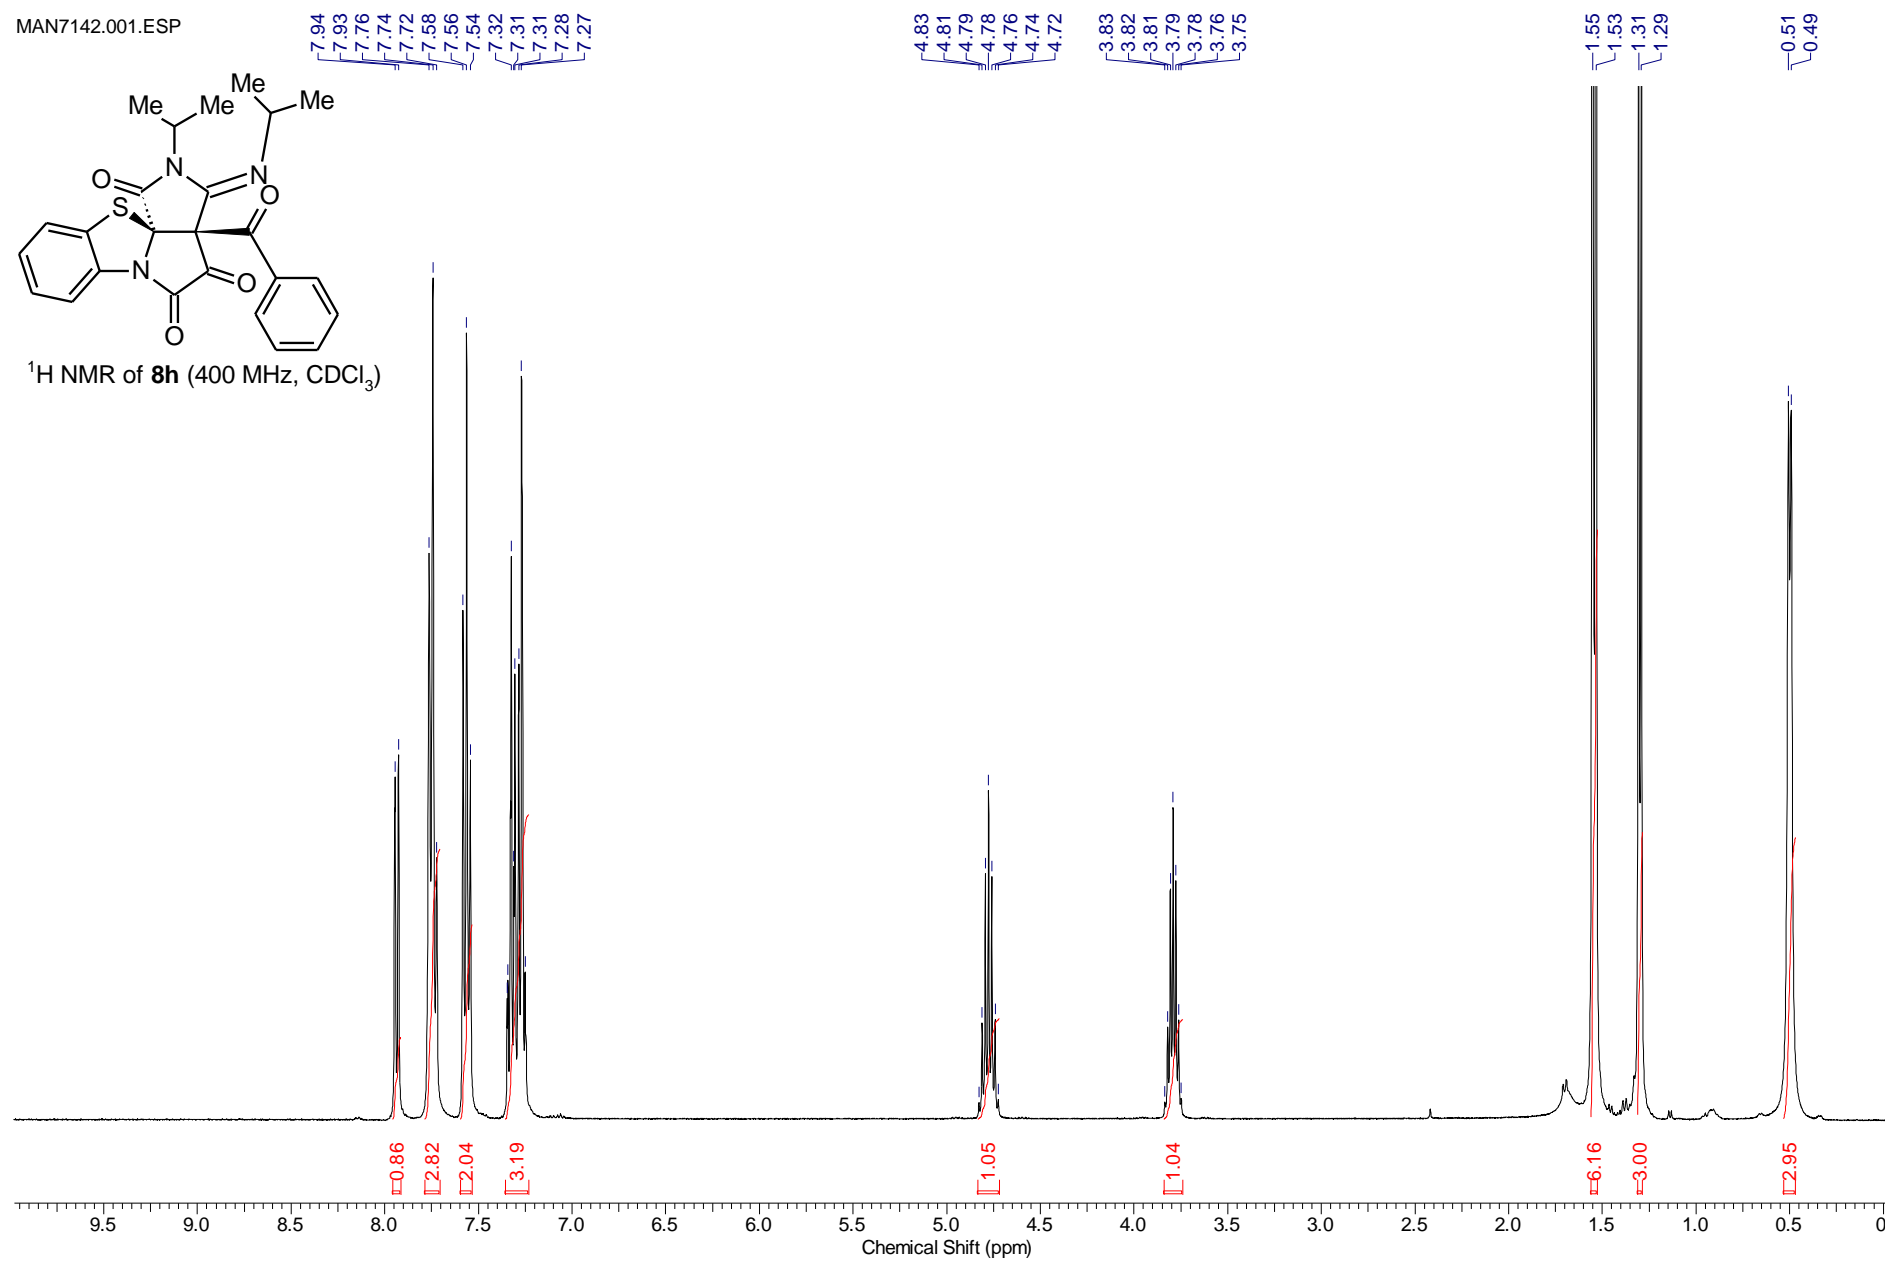



MAN7142.002.ESS

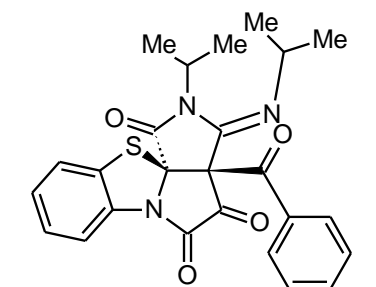

$^{13}\text{C}$  NMR of **8h** (100 MHz,  $\text{CDCl}_3$ )

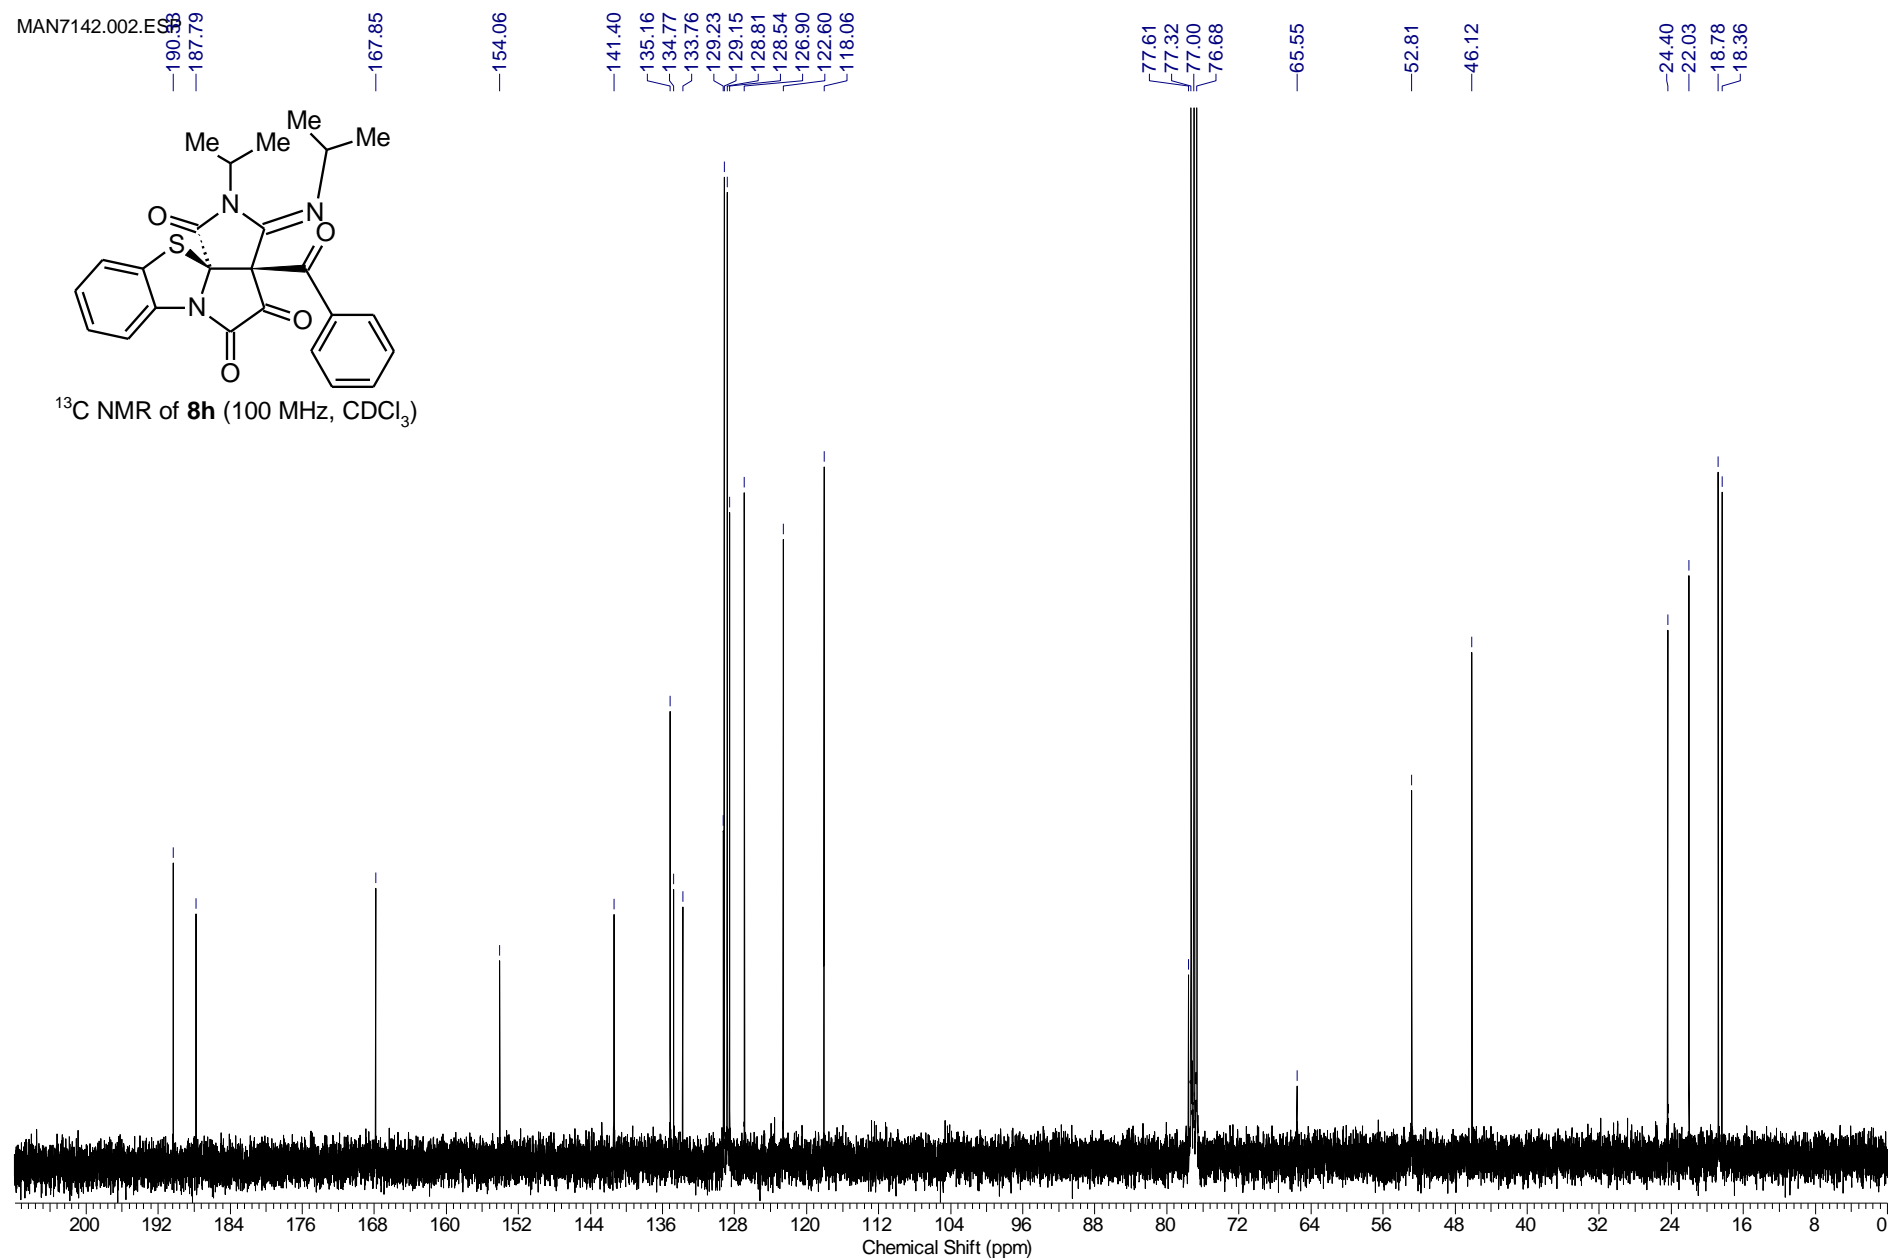

MAN7142.003.ESP

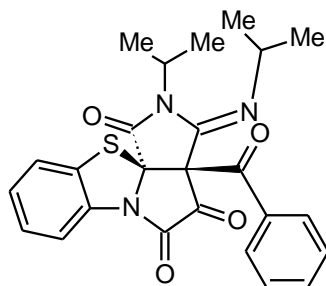

DEPT135 of **8h** (100 MHz, CDCl<sub>3</sub>)

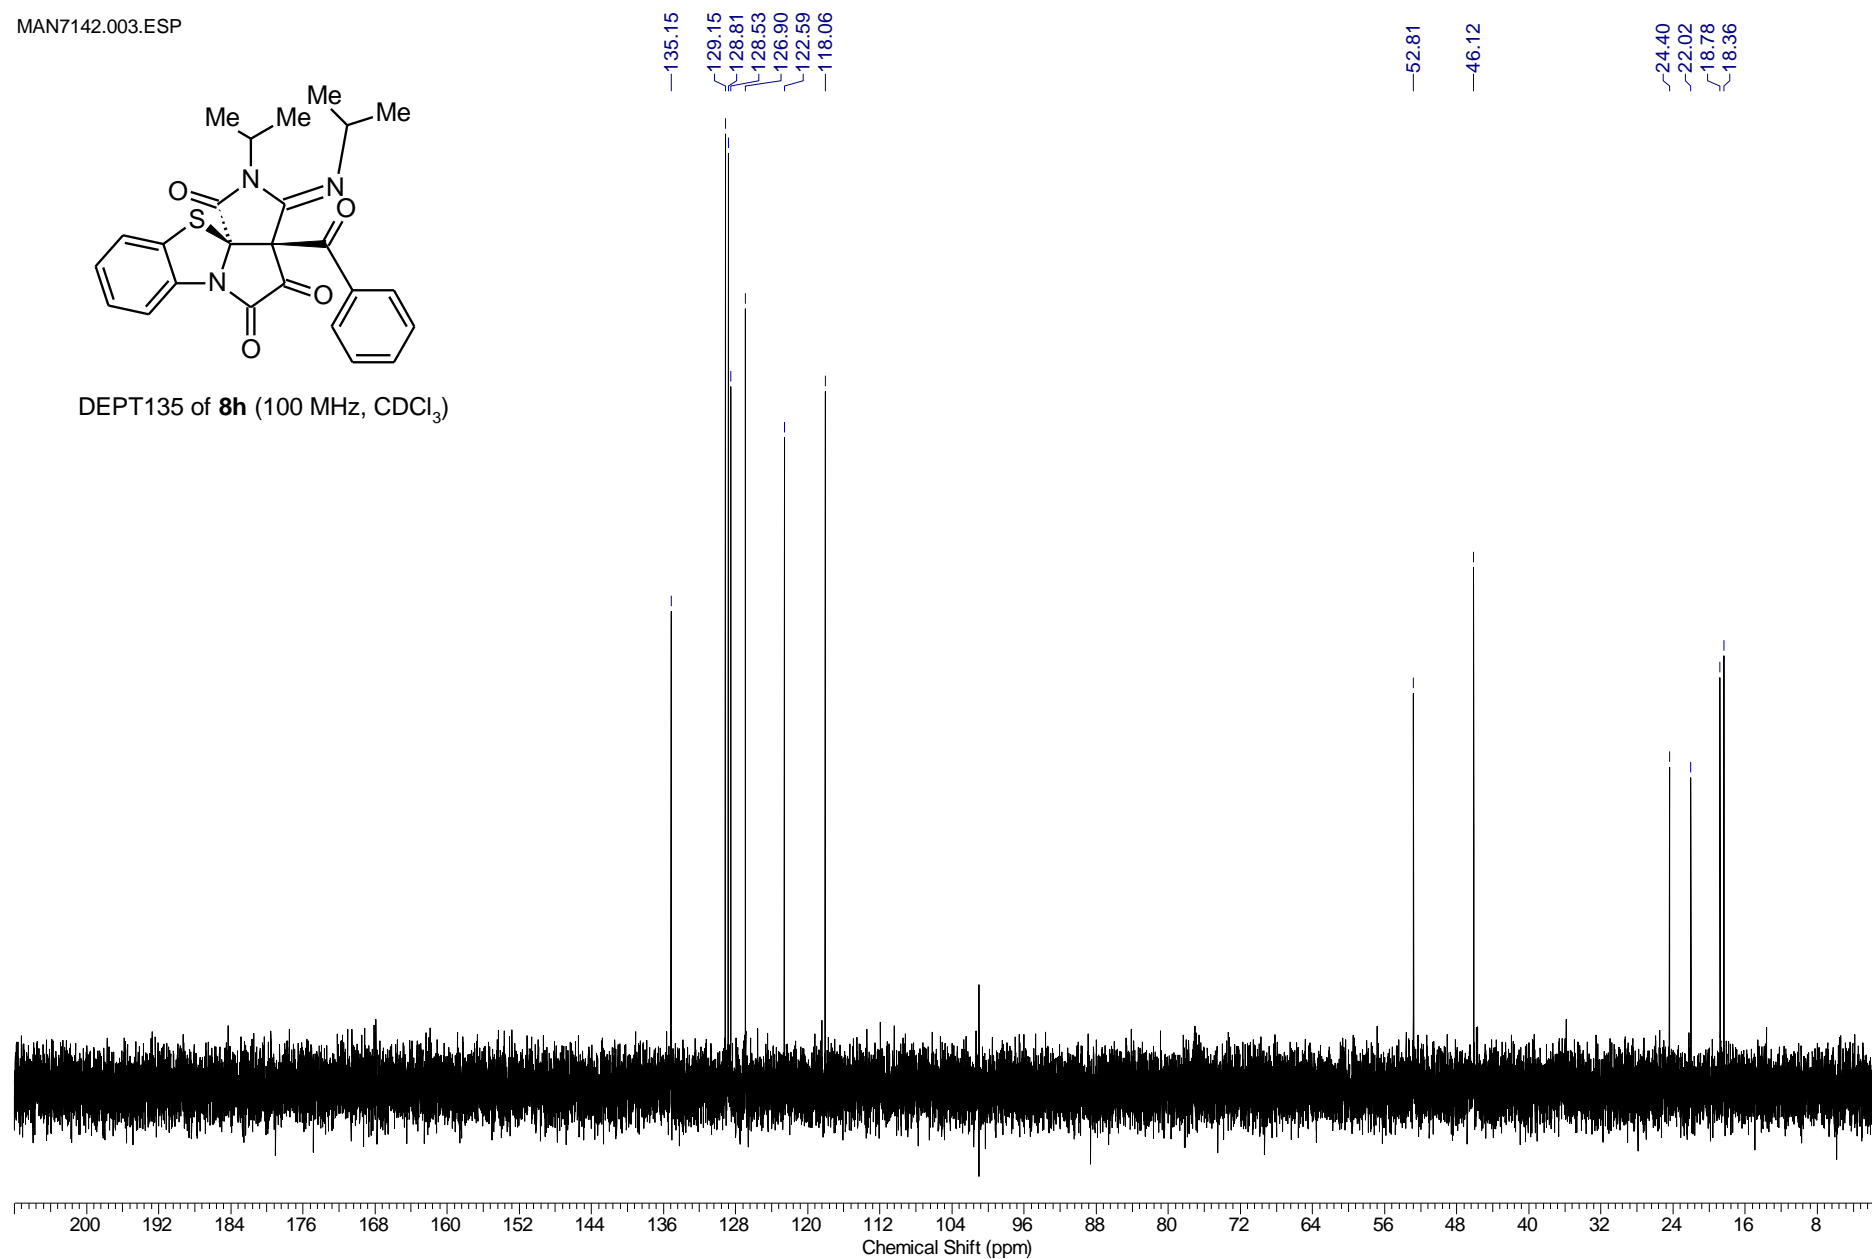

MAN7282.001.ESP

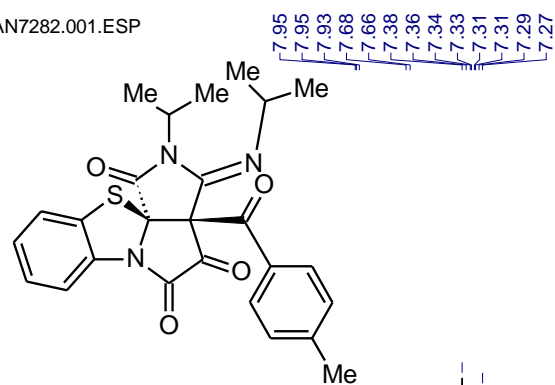

$^1\text{H}$  NMR of **8i** (400 MHz,  $\text{CDCl}_3$ )

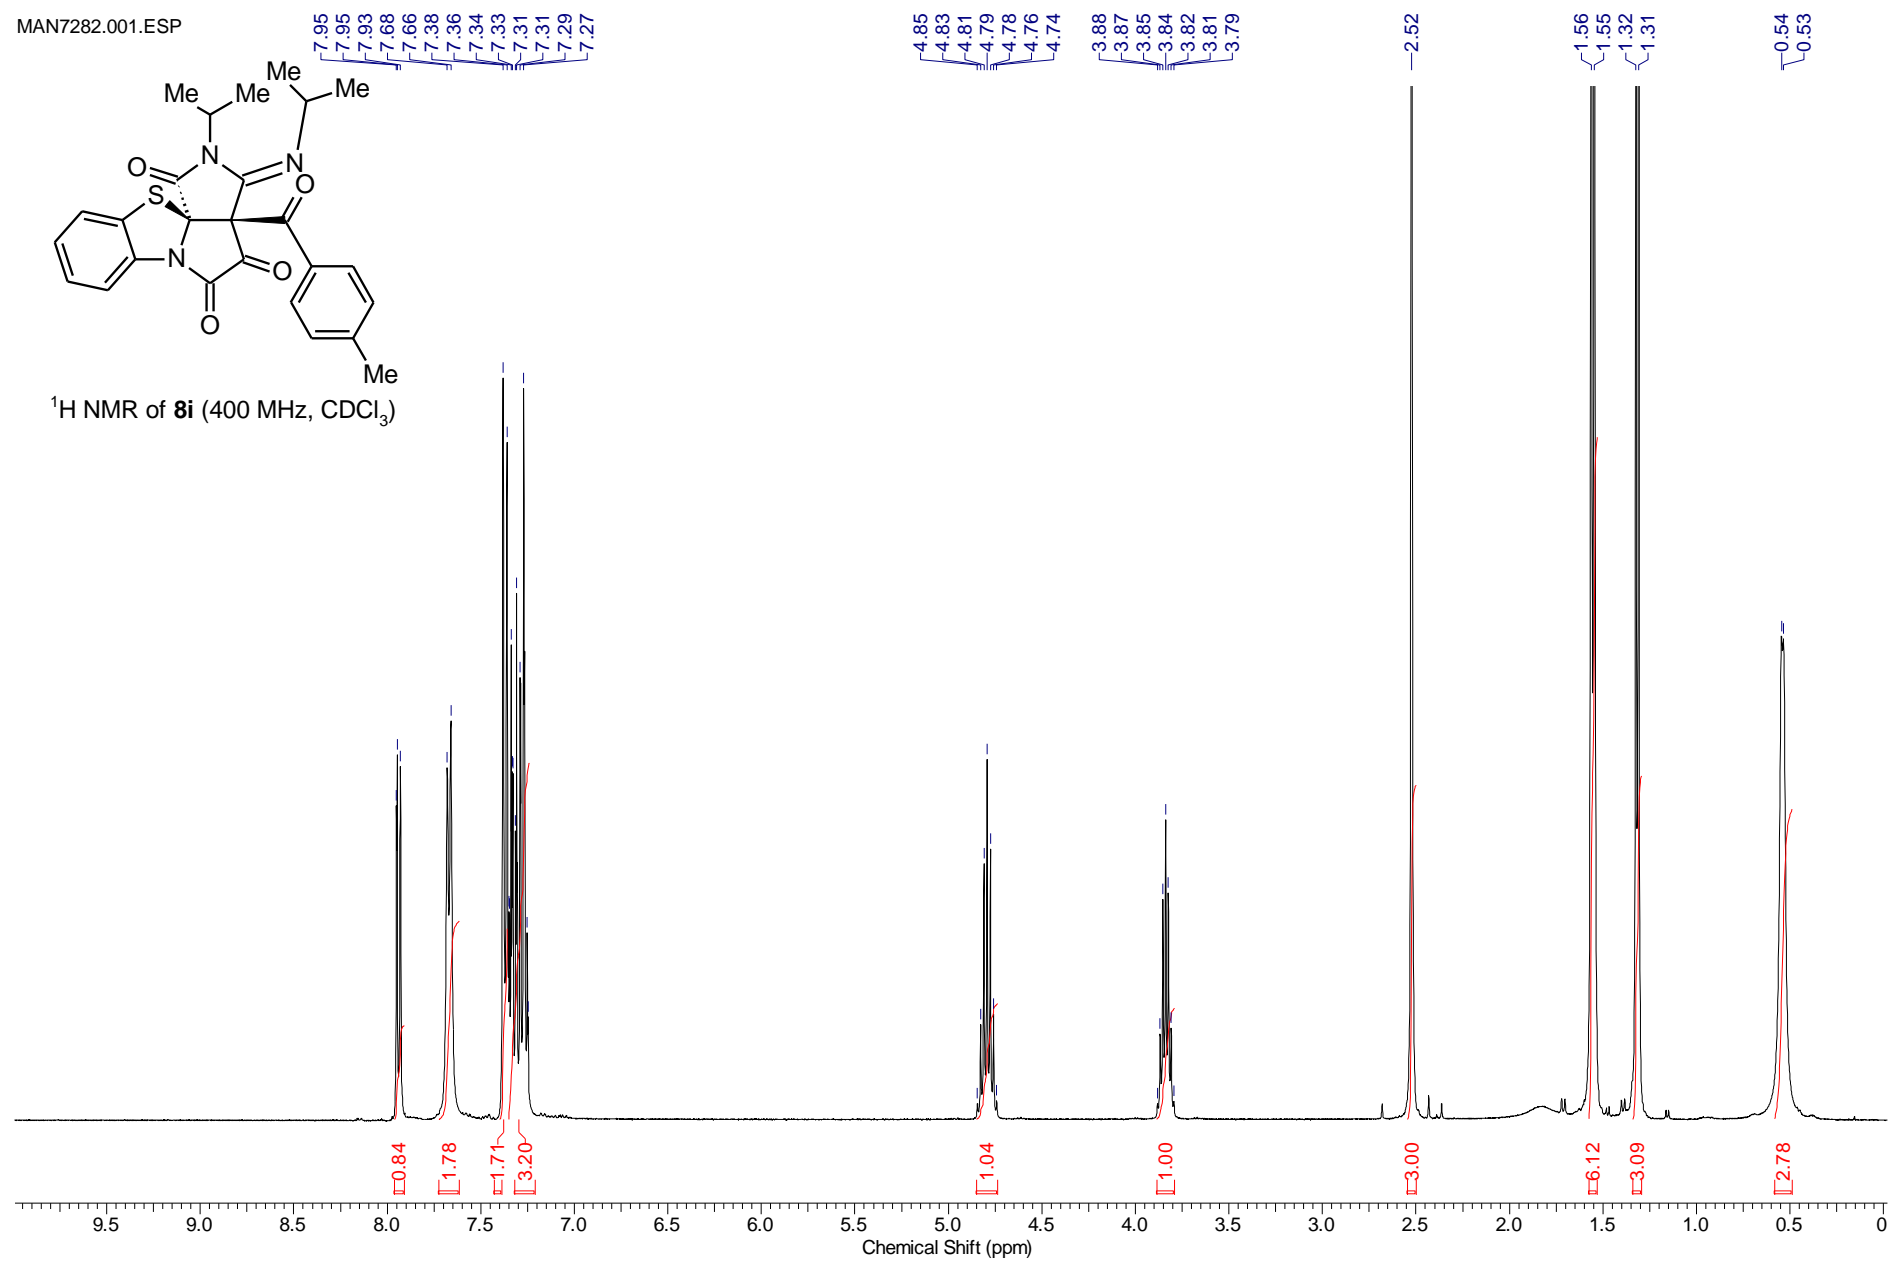

MAN7282.002.ES.09

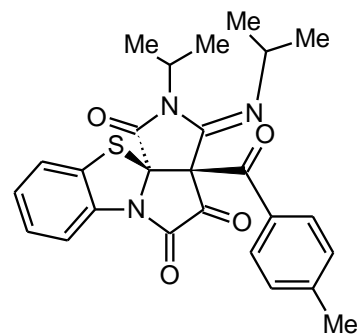

$^{13}\text{C}$  NMR of **8i** (100 MHz,  $\text{CDCl}_3$ )

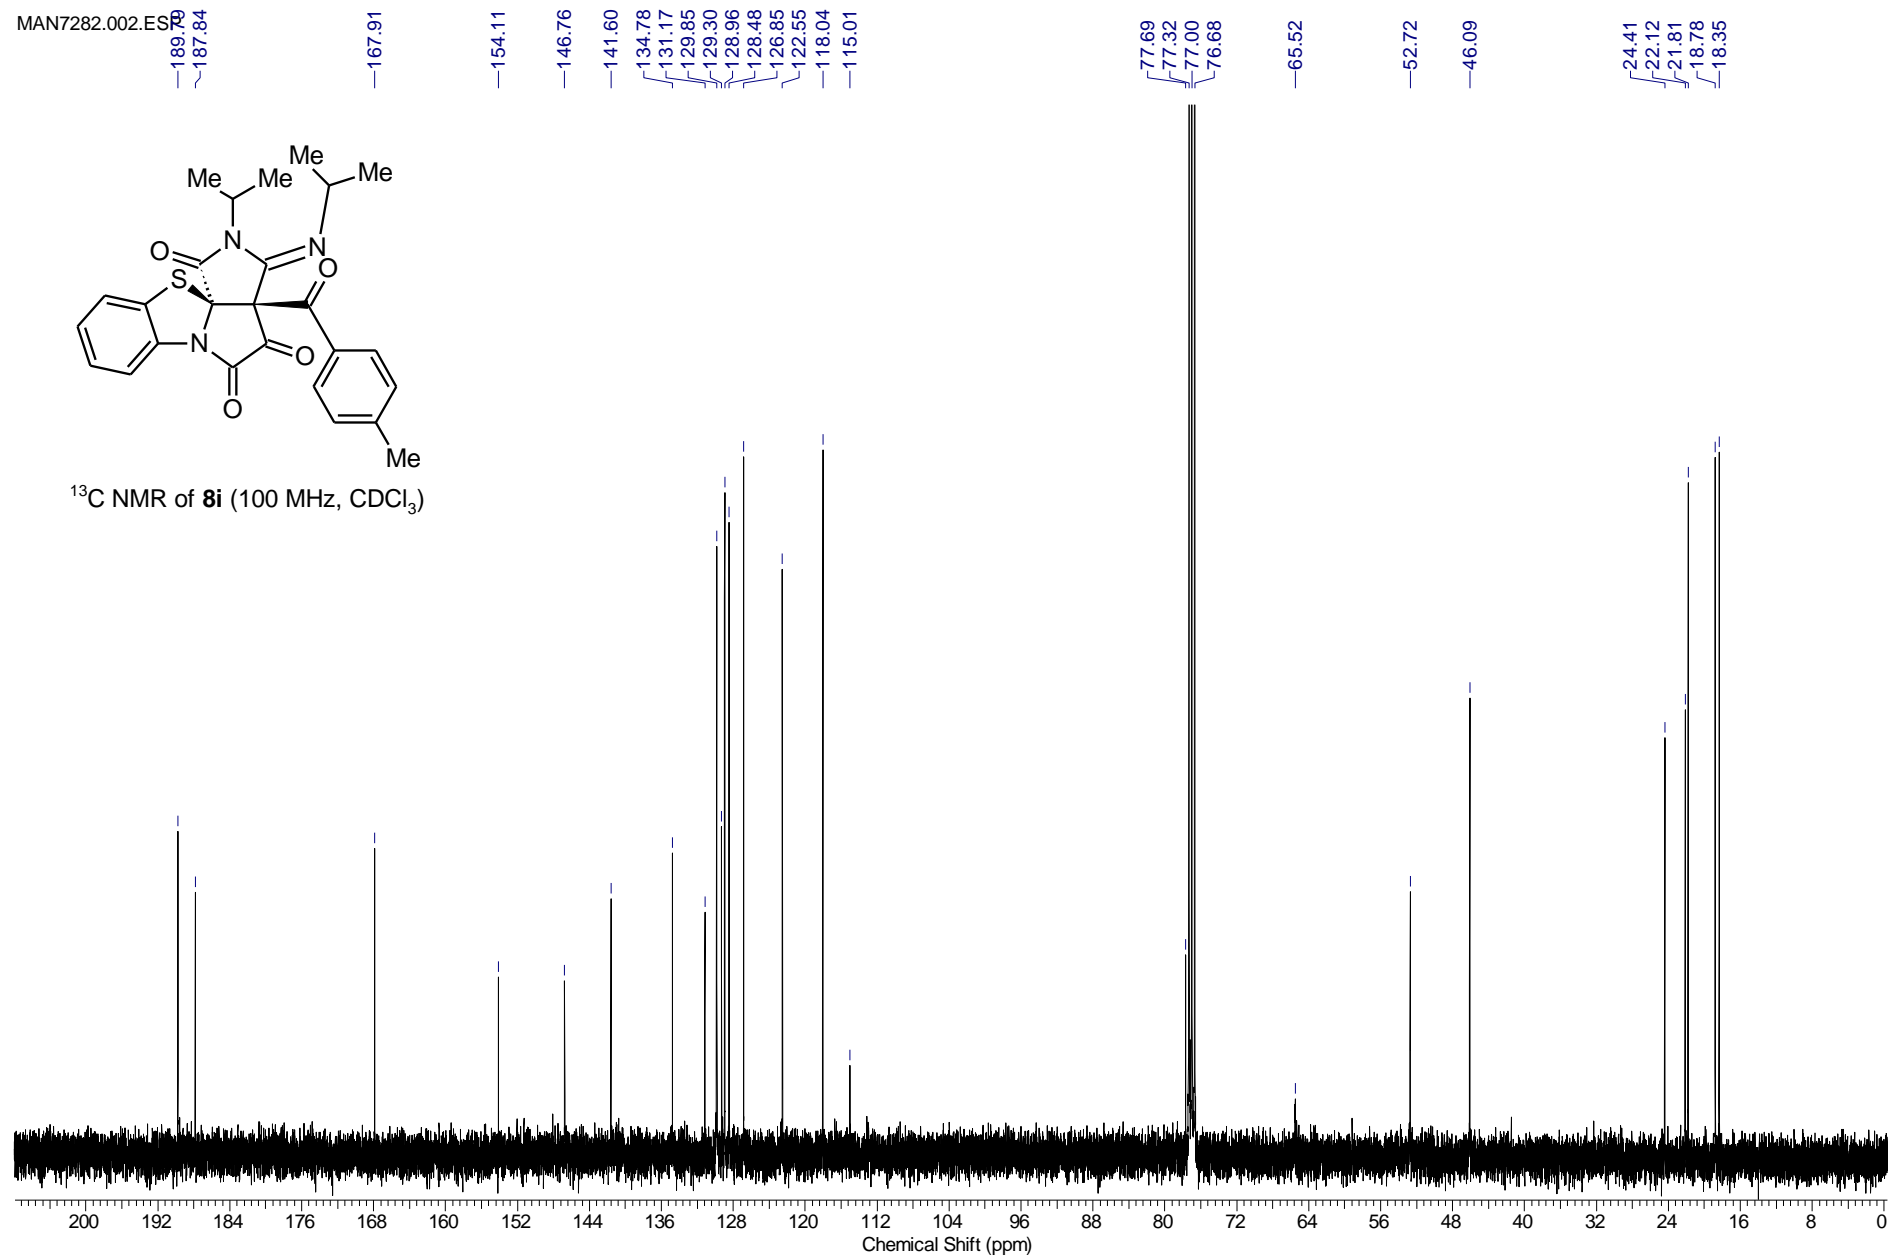

MAN7282.003.ESP

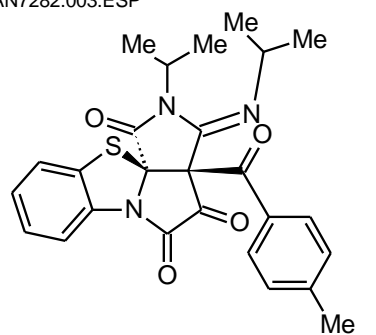

DEPT135 of **8i** (100 MHz, CDCl<sub>3</sub>)

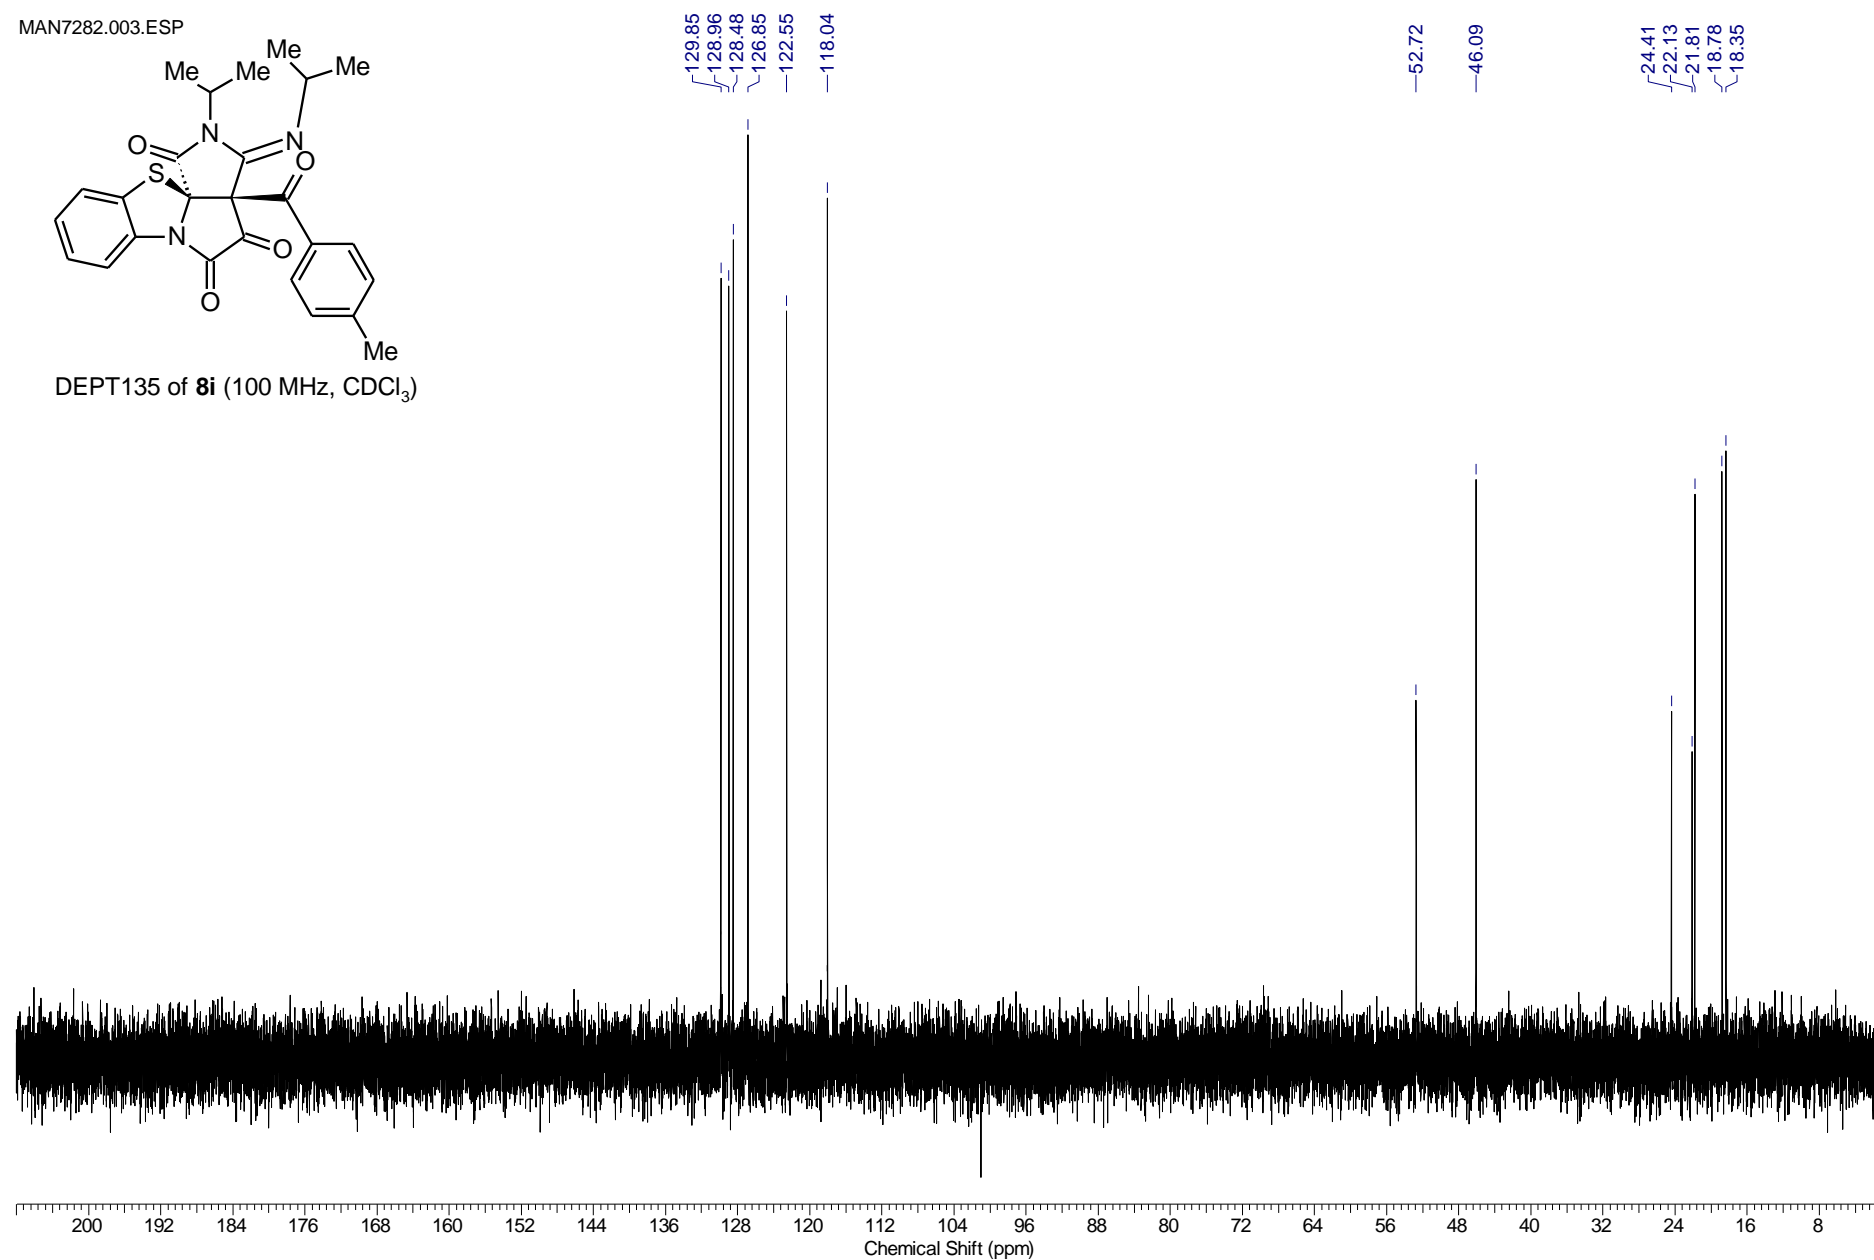

MAN7281.001.ESP

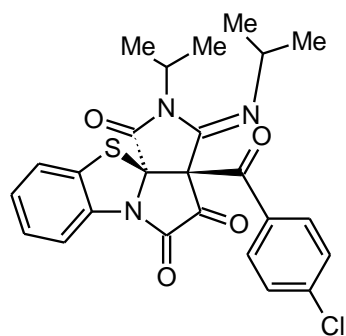

$^1\text{H}$  NMR of **8j** (400 MHz,  $\text{CDCl}_3$ )

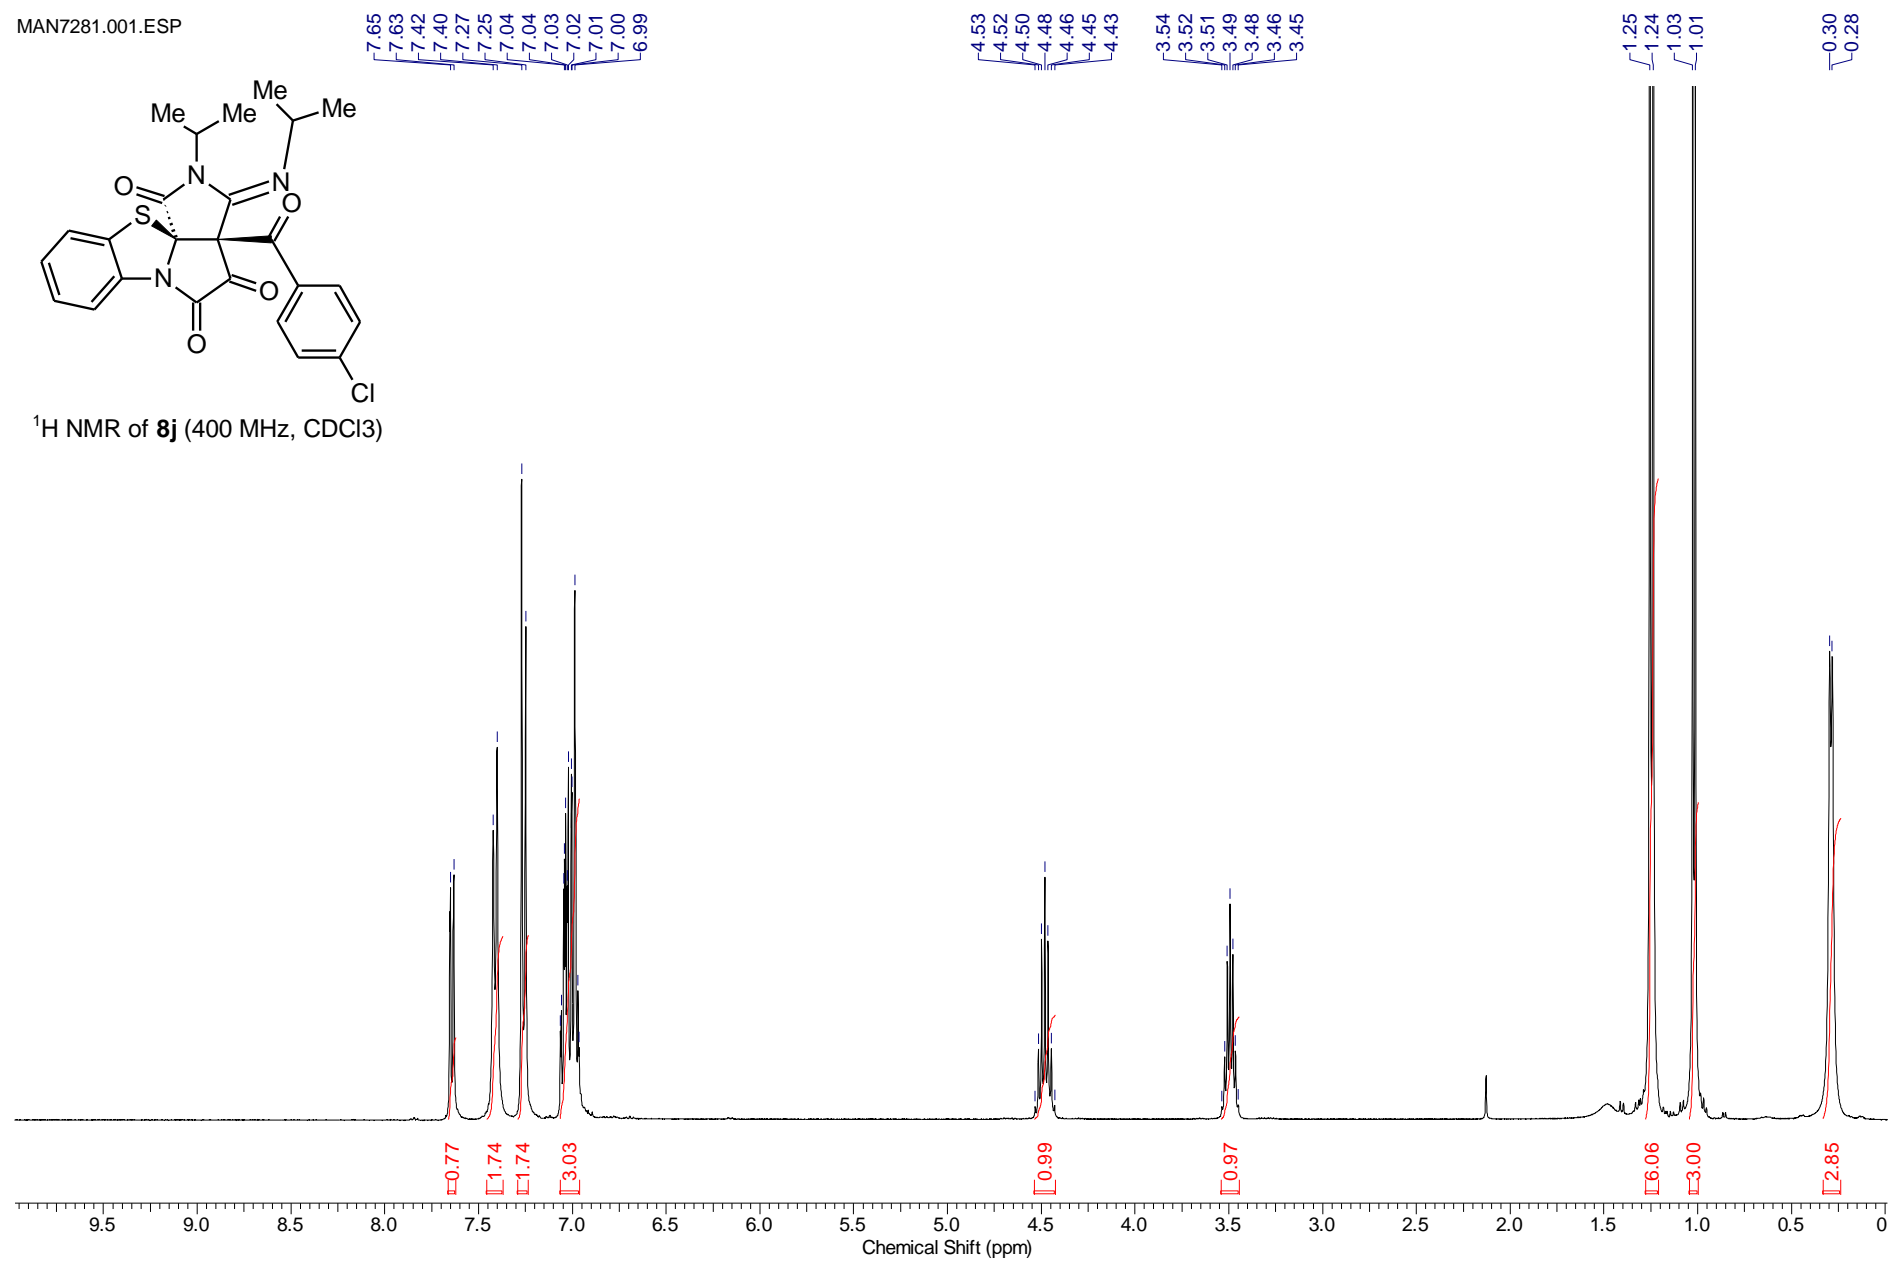

MAN7281.002.ESP

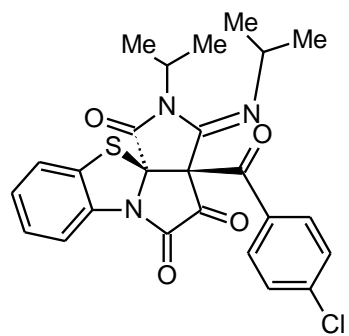

$^{13}\text{C}$  NMR of **8j** (100 MHz,  $\text{CDCl}_3$ )

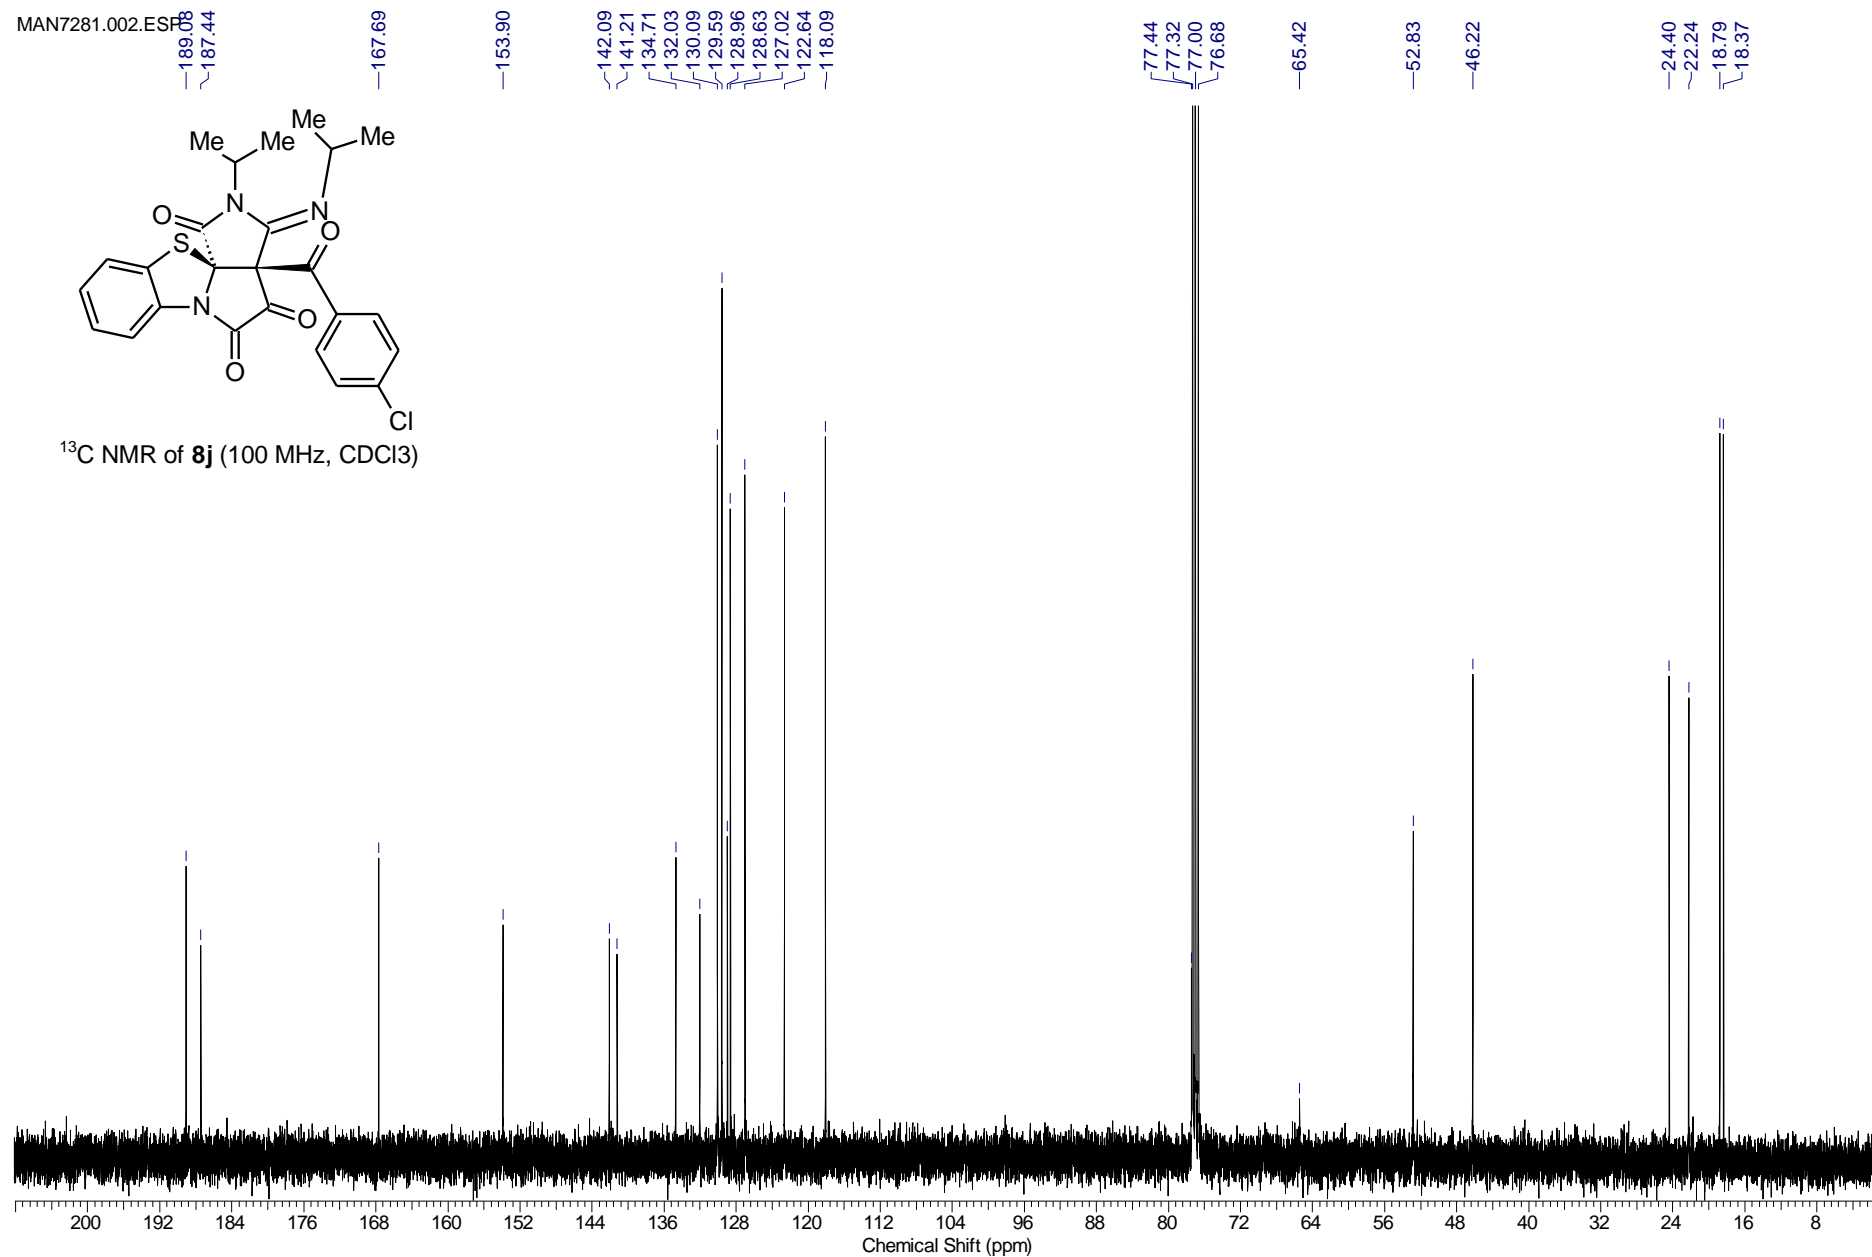

MAN7281.003.ESP

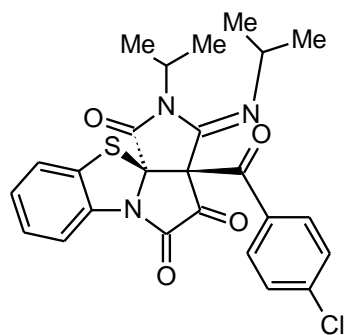

DEPT135 of **8j** (100 MHz, CDCl<sub>3</sub>)

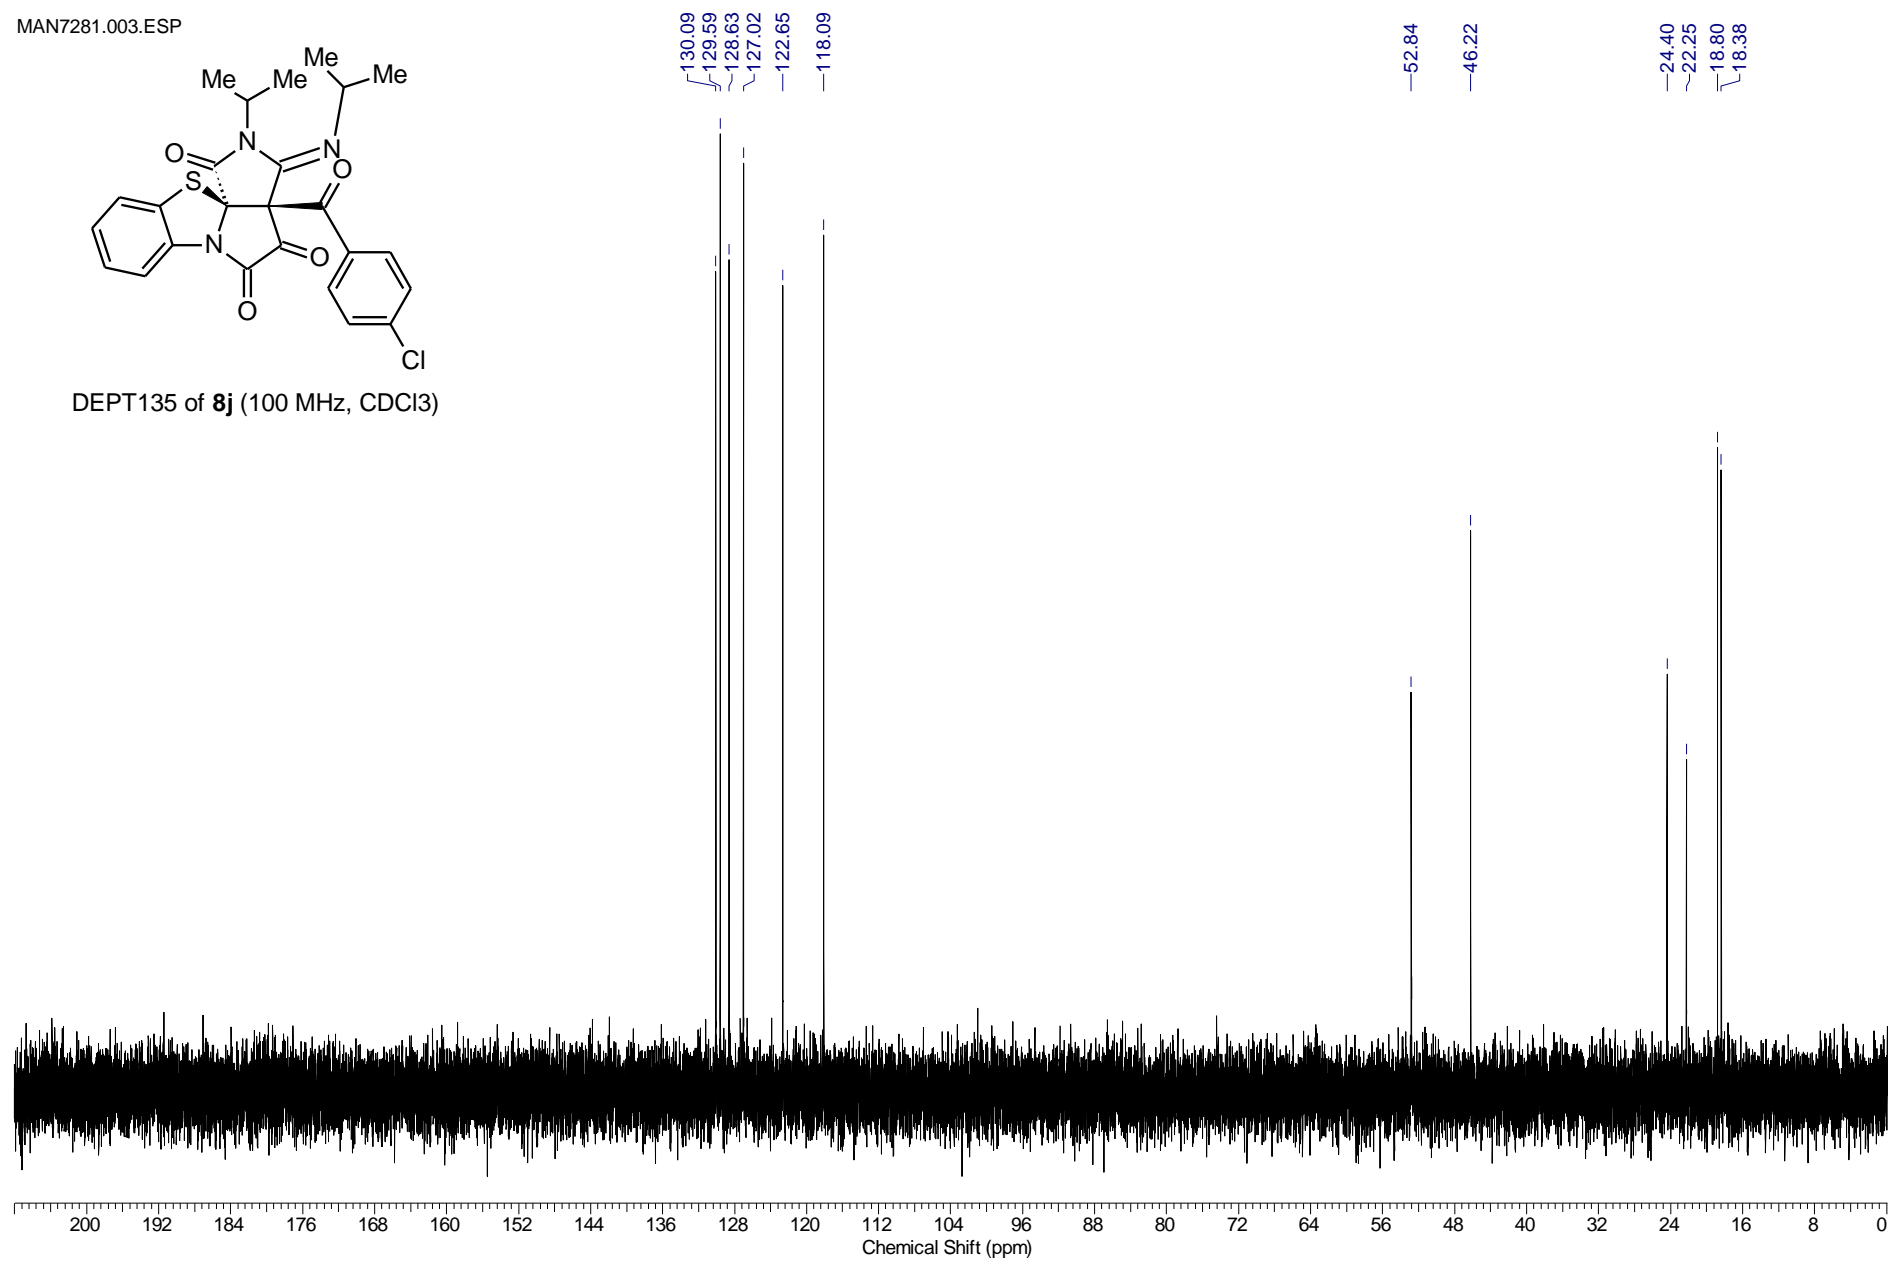



MAN8285.001.esp

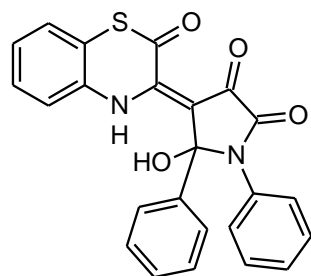

$^1\text{H}$  NMR of **4a** (400 MHz,  $\text{DMSO}-d_6$ )

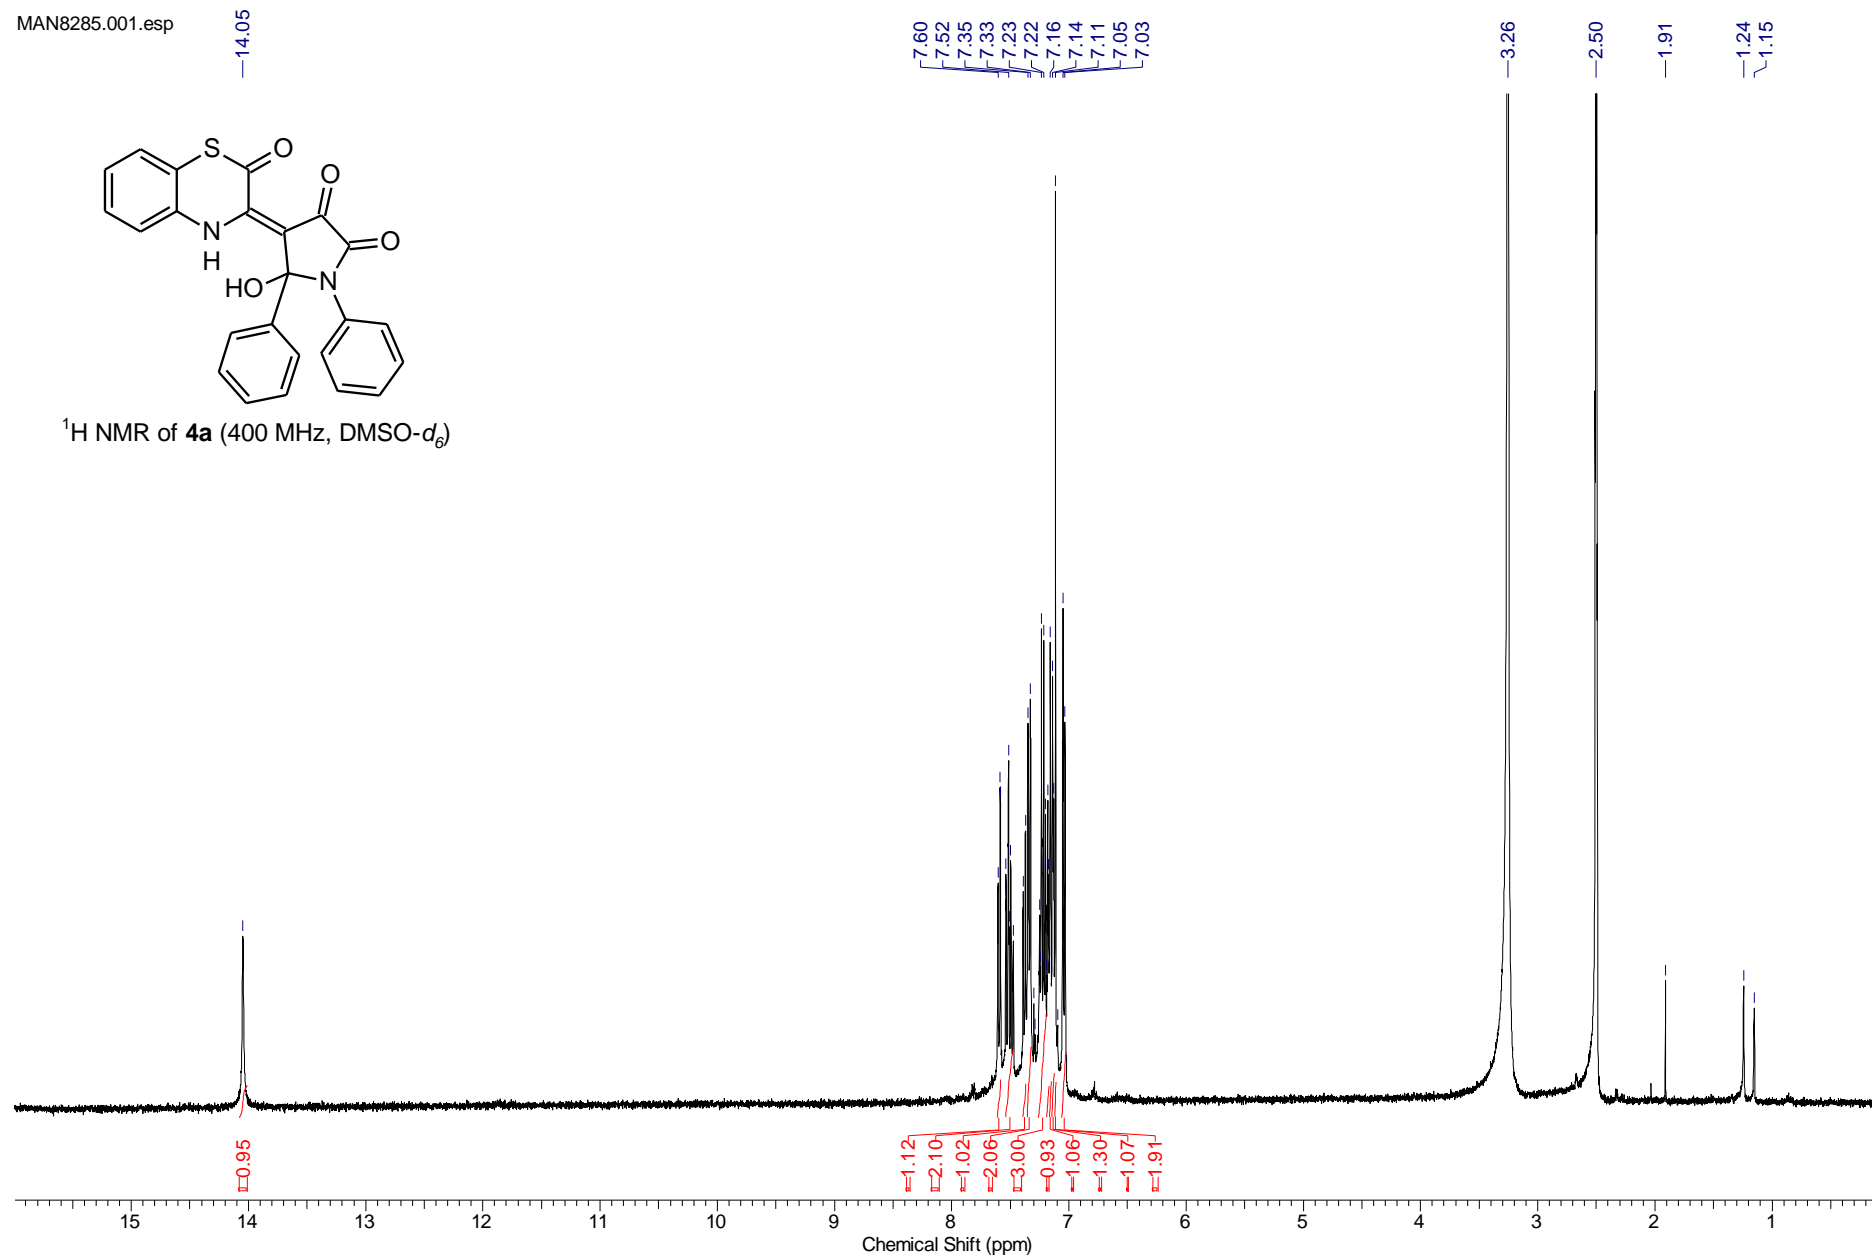

MAN8465.001.esp

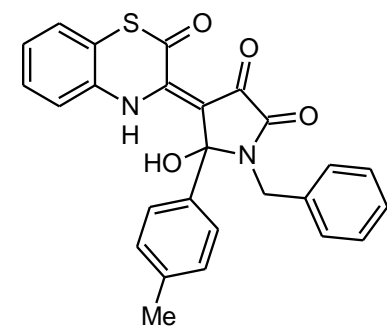

$^1\text{H}$  NMR of **4b** (400 MHz,  $\text{DMSO}-d_6$ )

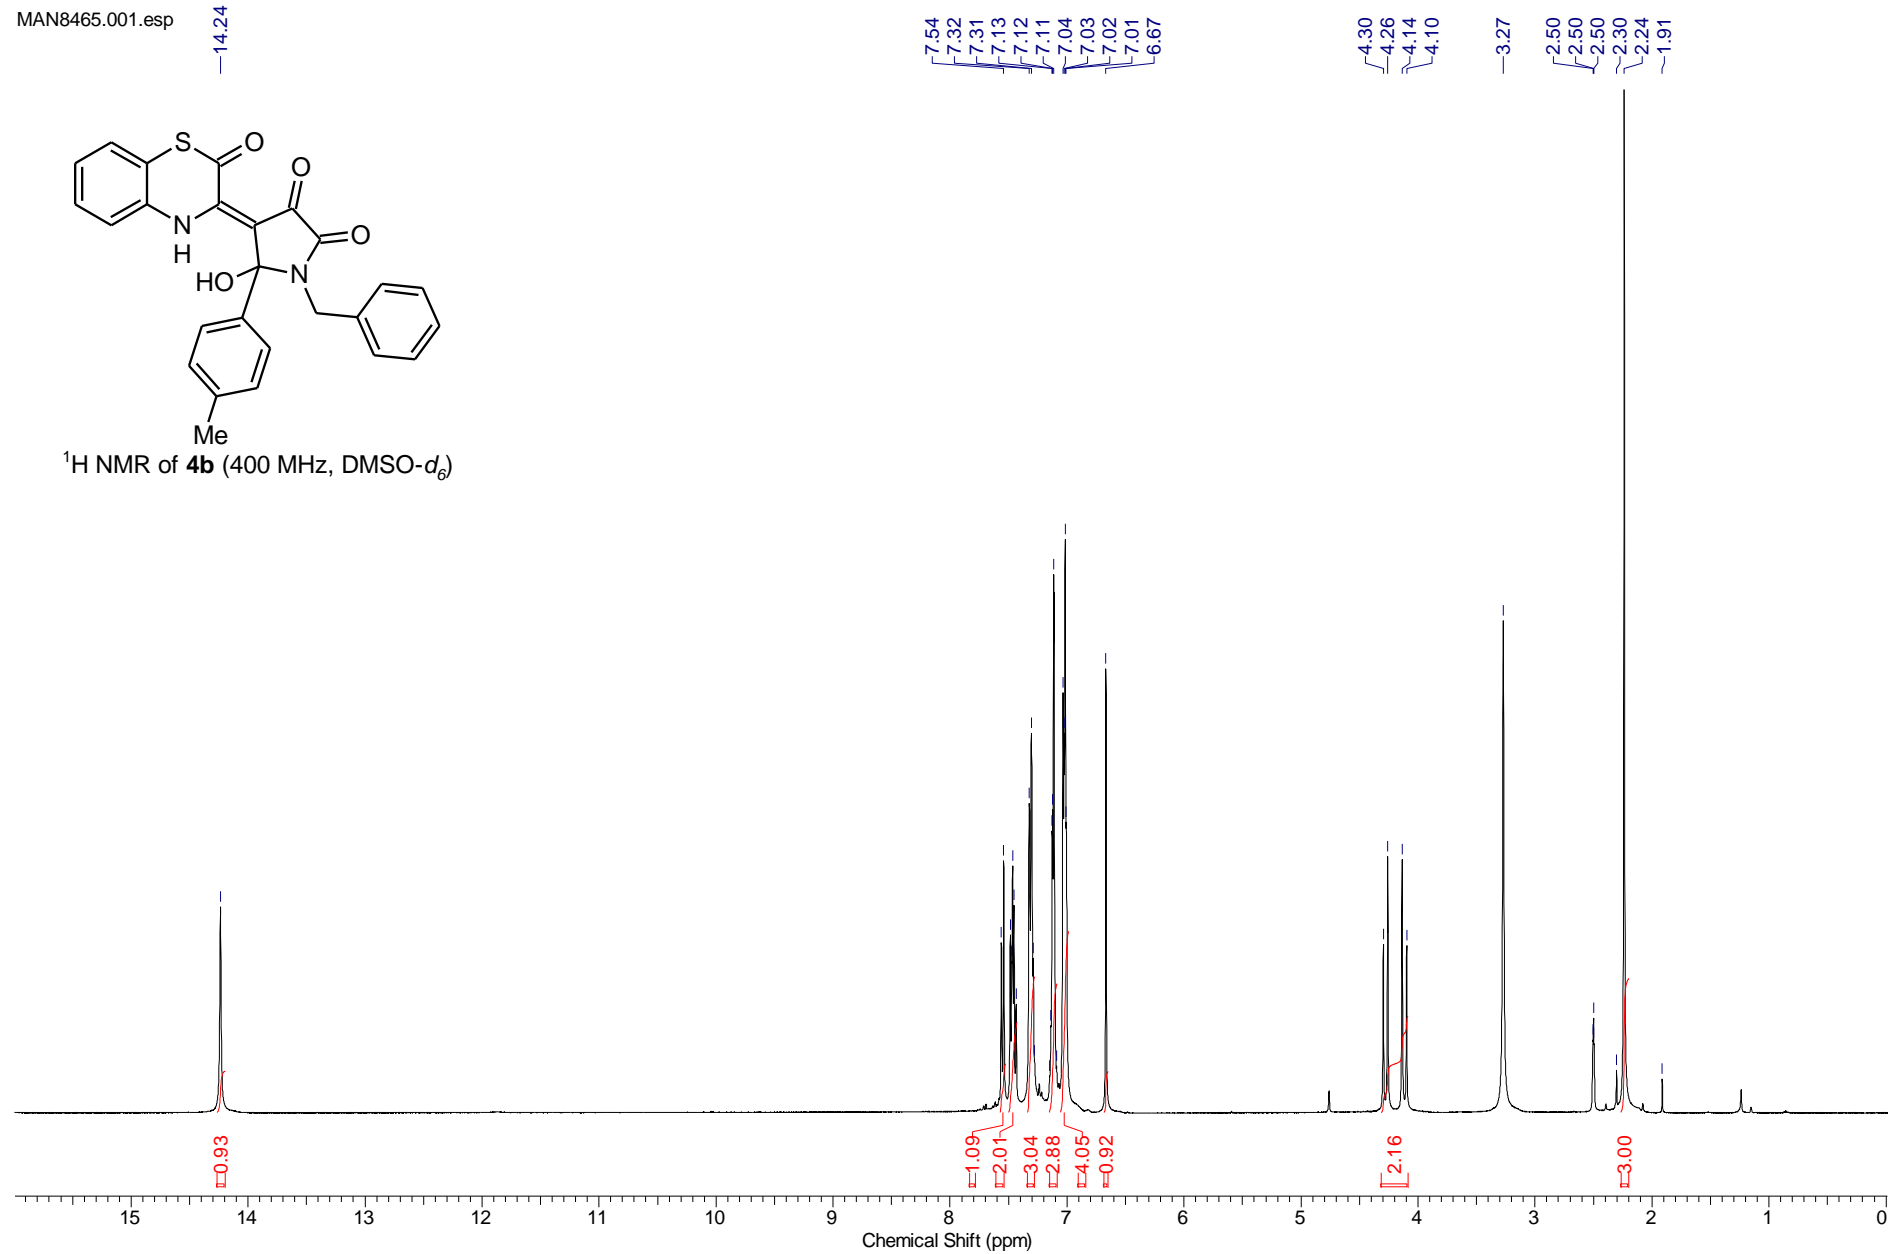

—20.49

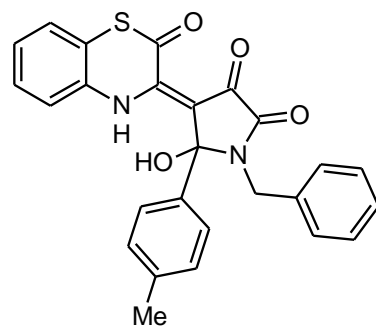 $^{13}\text{C}$  NMR of **4b** (100 MHz, DMSO- $d_6$ )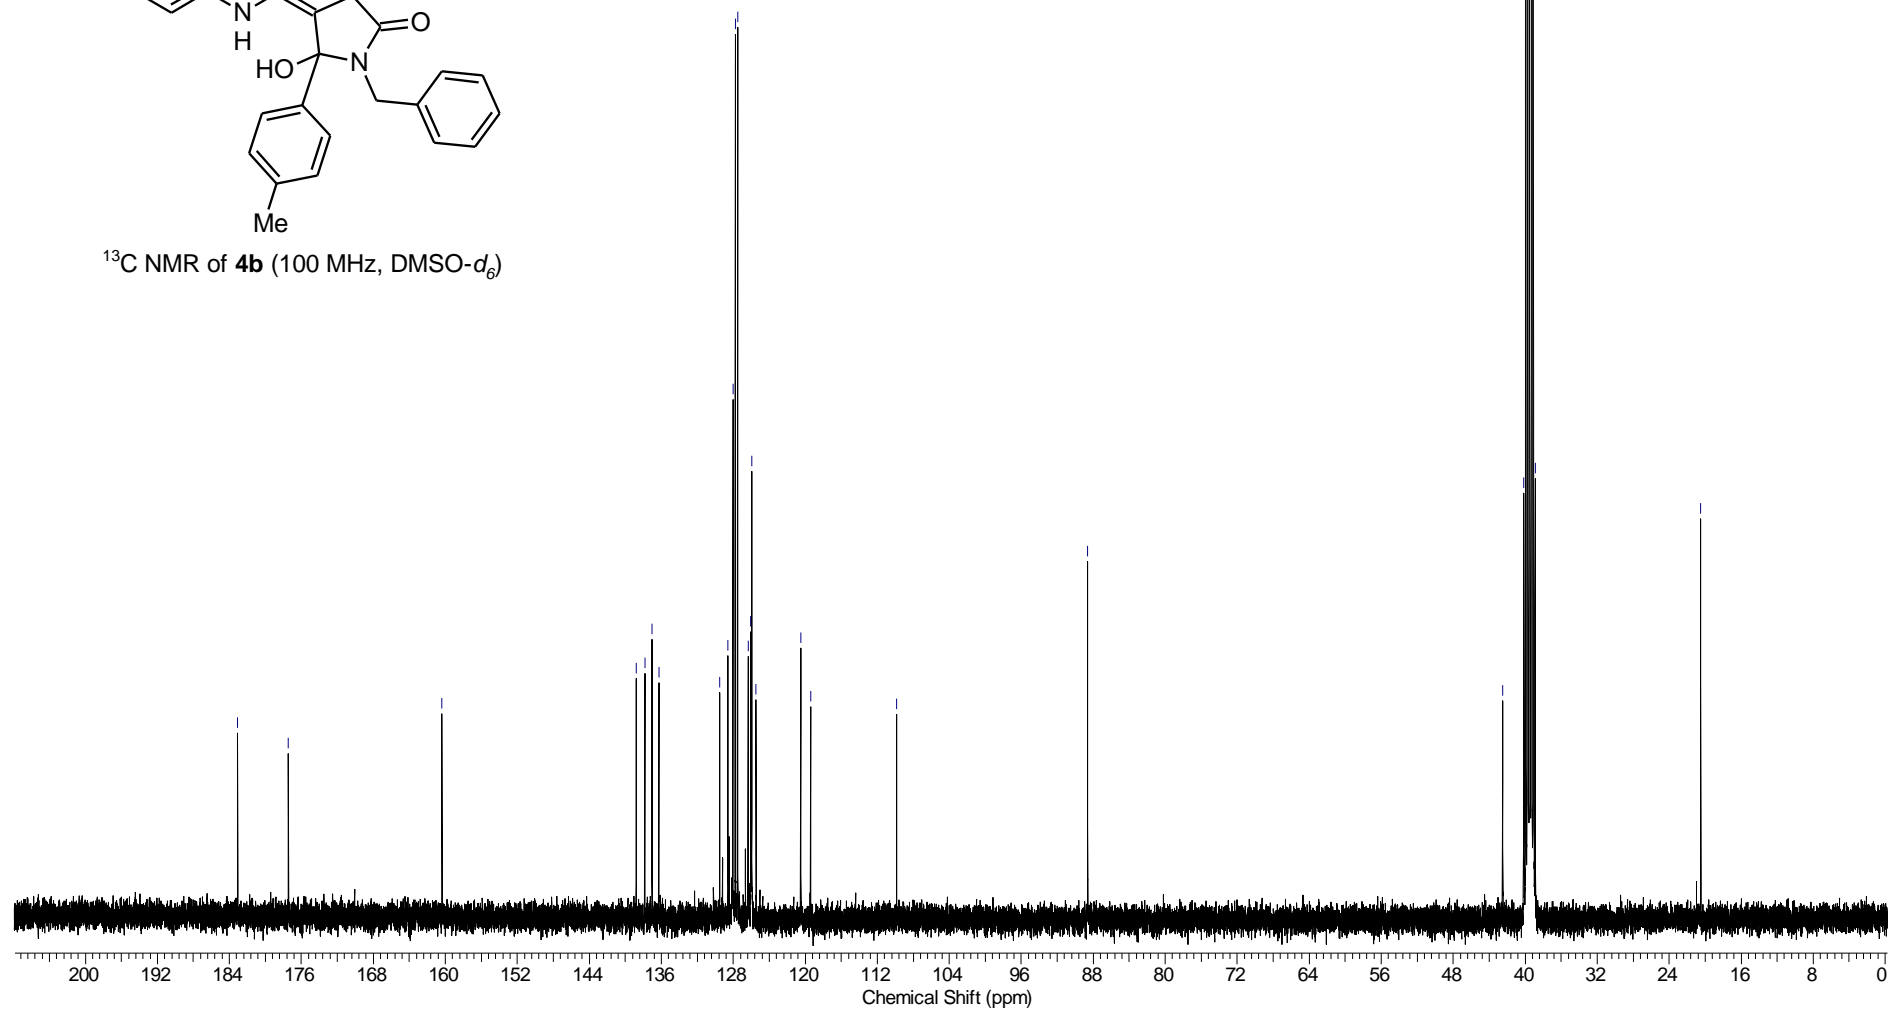

MAN8465.003.esp

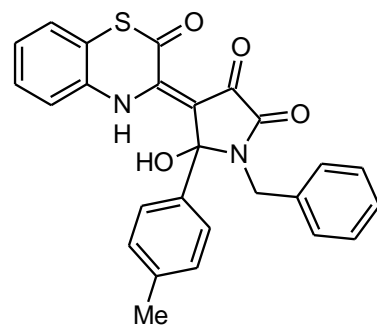

DEPT135 of **4b** (100 MHz, DMSO- $d_6$ )

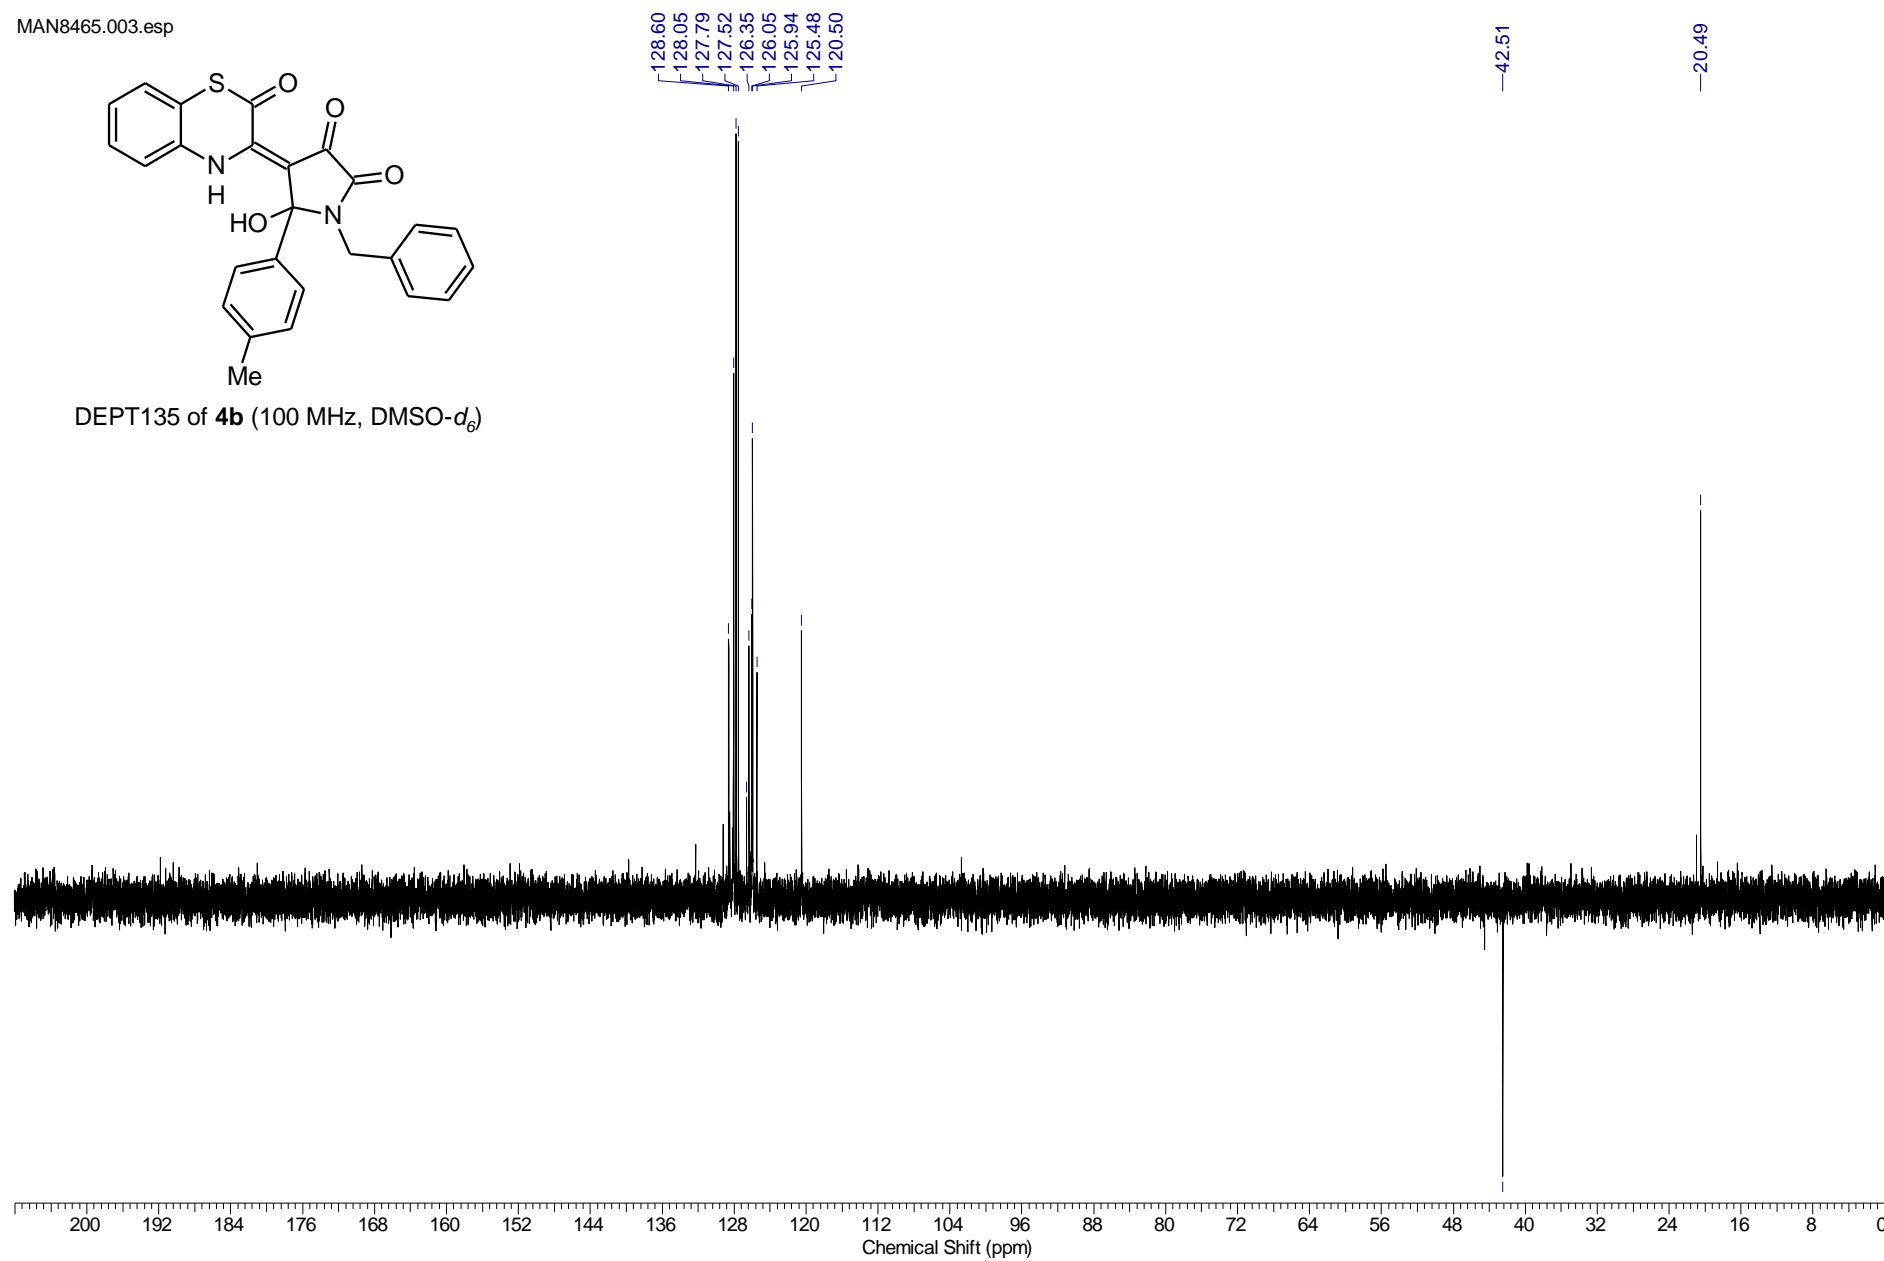

MAN8496.001.E59

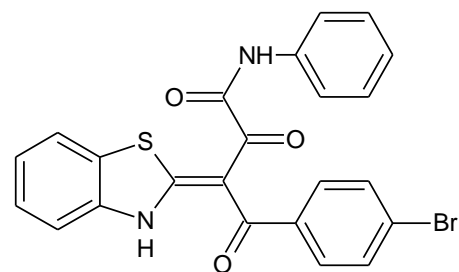

$^1\text{H}$  NMR of **6d** (400 MHz,  $\text{DMSO}-d_6$ )

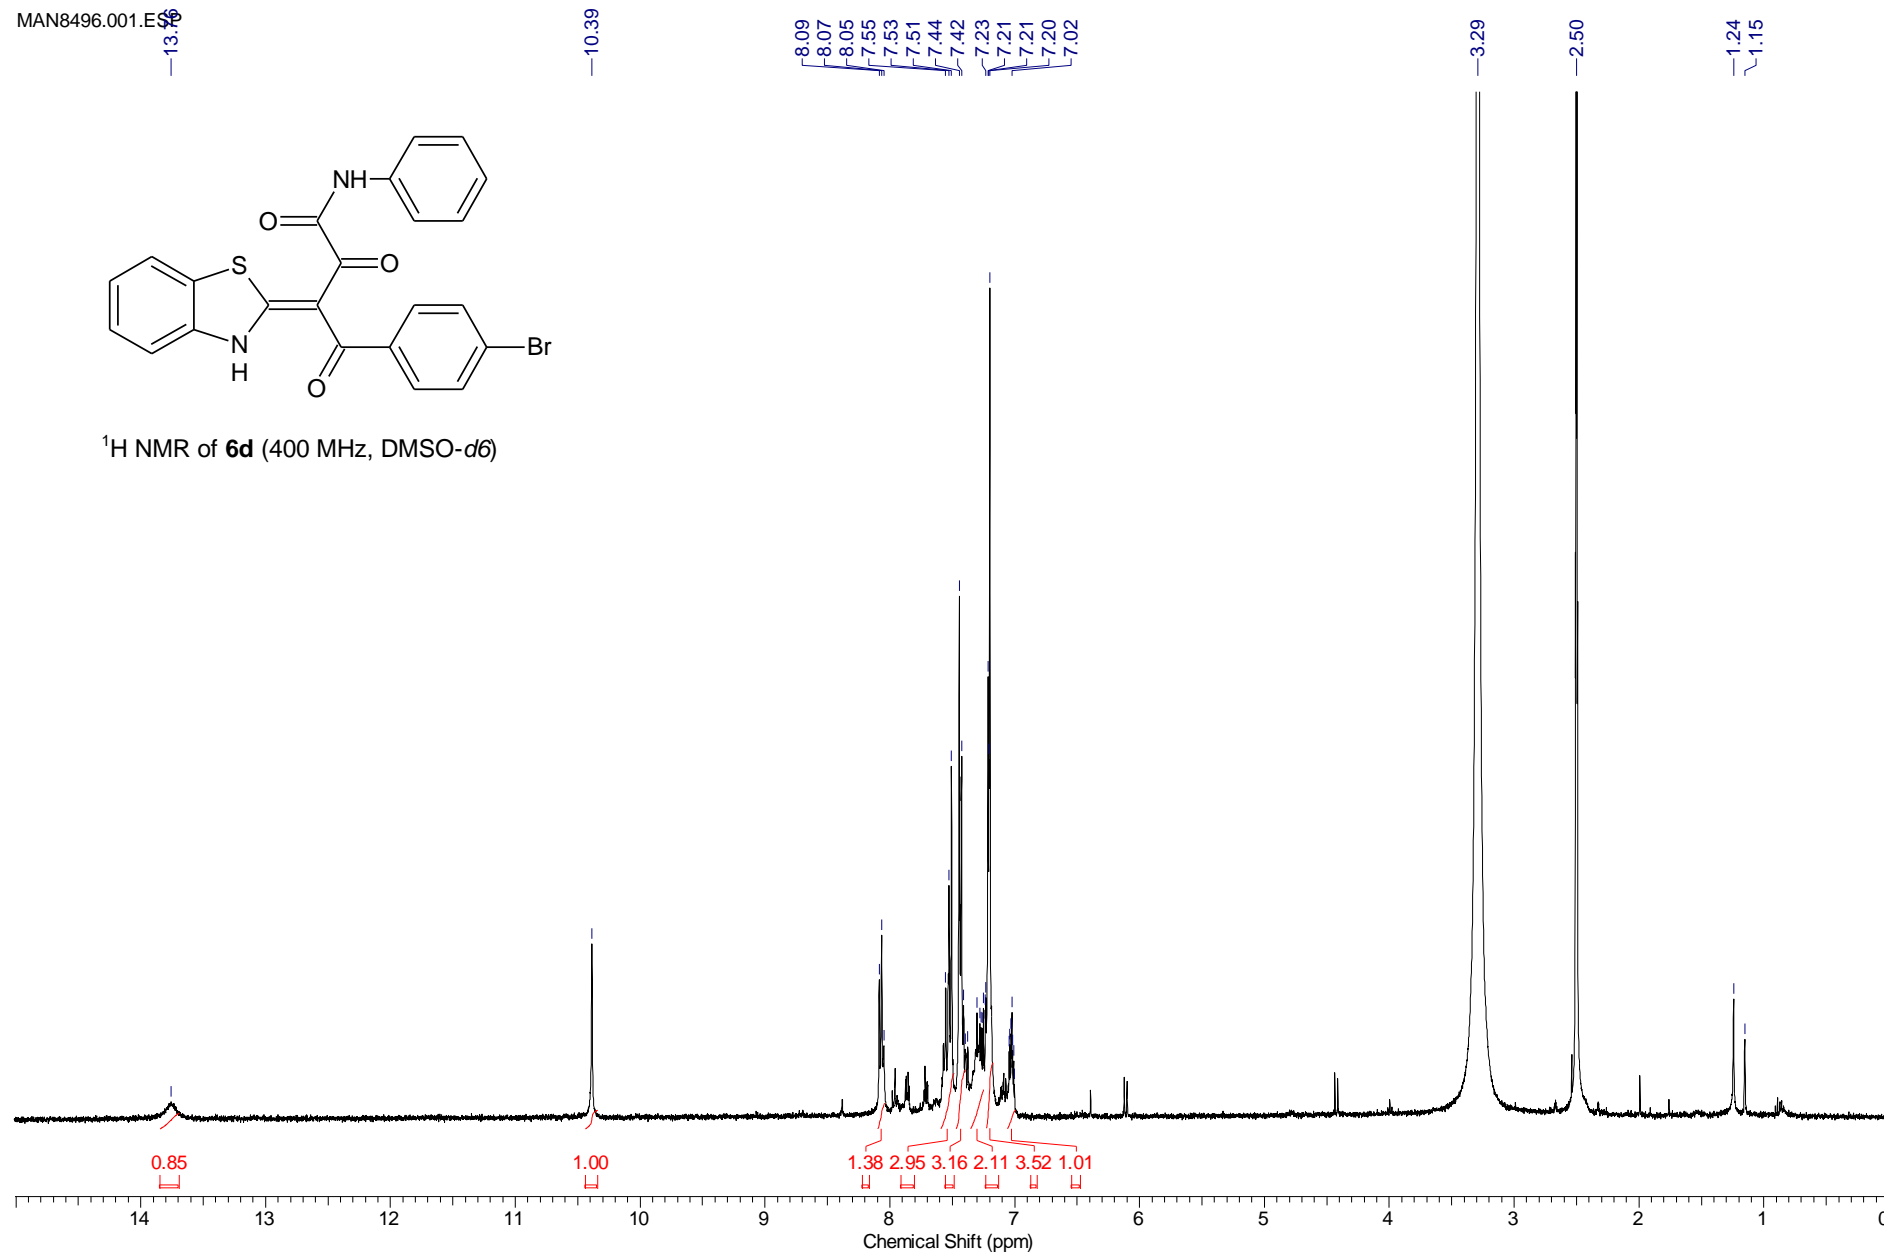

Calculated total electronic energies (E, in Hartree), enthalpies (H, in Hartree), Gibbs free energies (G, in Hartree), and entropies (S, cal/mol•K) for optimized equilibrium model structures.

| Model structure | E              | H            | G            | S       |
|-----------------|----------------|--------------|--------------|---------|
| <b>2a</b>       | -556.505478837 | -556.288000  | -556.337930  | 105.087 |
| <b>1a</b>       | -1444.70735189 | -1444.455577 | -1444.525748 | 147.689 |
| <b>OC</b>       | -2001.22427330 | -2000.752484 | -2000.853026 | 211.608 |
| <b>I2</b>       | -2001.20499337 | -2000.732654 | -2000.826957 | 198.477 |
| <b>3a</b>       | -2001.27537318 | -2000.801112 | -2000.892382 | 192.095 |
| <b>3'a</b>      | -2001.28342773 | -2000.808838 | -2000.899955 | 191.773 |
| <b>TS</b>       | -2001.21741473 | -2000.745789 | -2000.837371 | 192.749 |
| <b>TS'</b>      | -2001.21575382 | -2000.744961 | -2000.834876 | 189.242 |

ORTEP images of X-ray crystal structures of compounds 3a, 4b, 6d, 8a

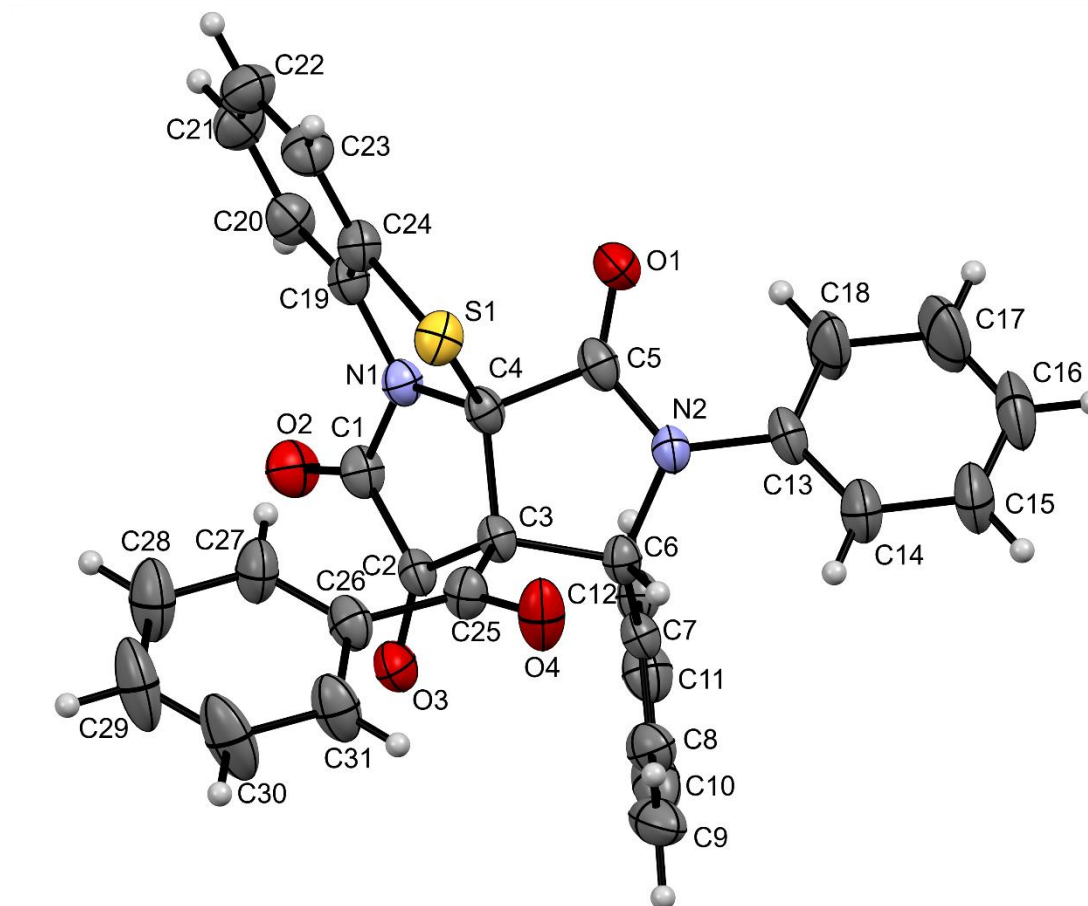

**Figure S1.** Molecular structure of compound **3a** showing 30% probability amplitude displacement ellipsoids (CCDC 2341688). Toluene solvate molecule is not shown.

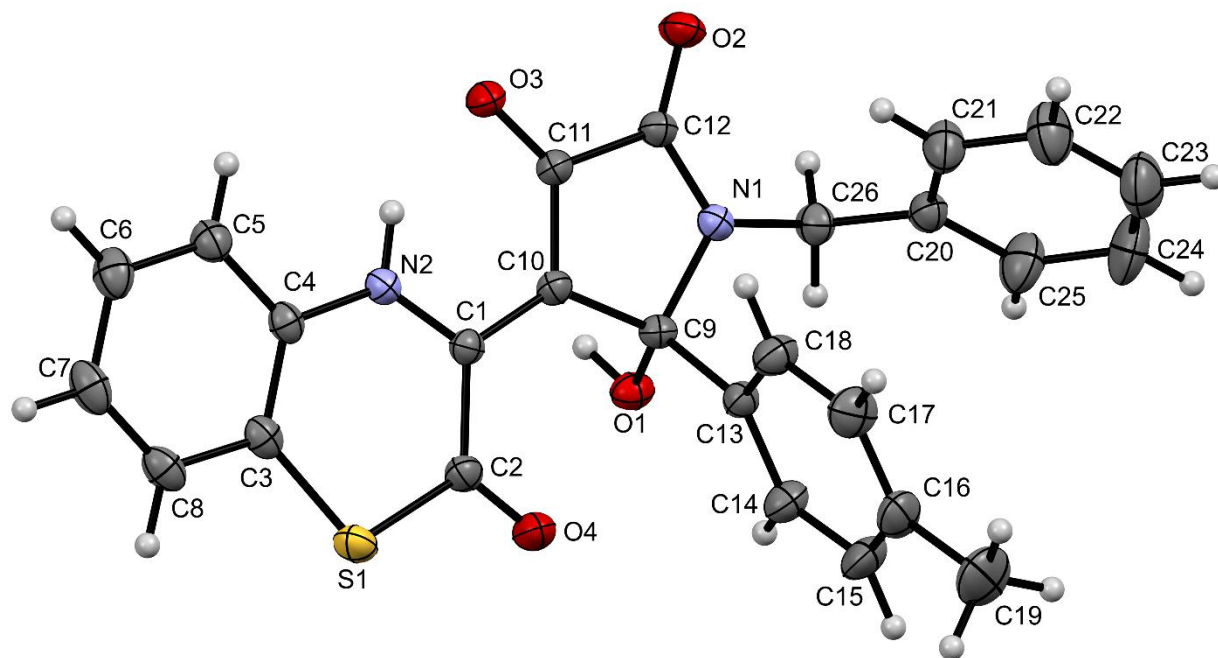

**Figure S2.** Molecular structure of compound **4b** showing 30% probability amplitude displacement ellipsoids (CCDC 2341690).





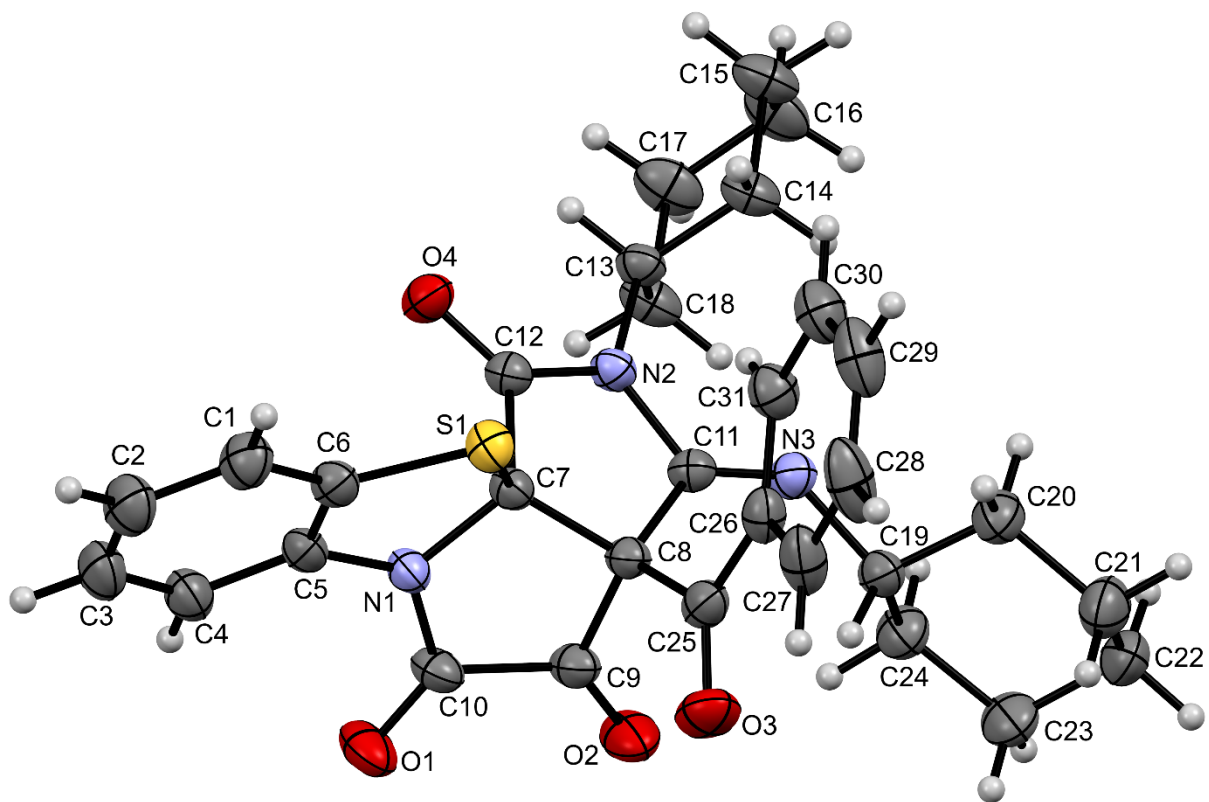

**Figure S4.** Molecular structure of compound **8a** showing 30% probability amplitude displacement ellipsoids (CCDC 2341689).
